# Supplementary material for: Probiotics in the non-surgical treatment of periodontitis: a systematic review and network meta-analysis
Source: PubMed Central journal article supplement — BMC Oral Health. 2024 Oct 15;24:1224. doi: 10.1186/s12903-024-05027-6 (PMC11481756; doi:10.1186/s12903-024-05027-6), 2024-10-15
Supplement: 12903_2024_5027_MOESM1_ESM.pdf [file 12903_2024_5027_MOESM1_ESM.pdf]

# **Probiotics in the treatment of periodontitis: a systematic review and network meta-analysis**

Carlota Duarte de Mendonça.<sup>1,2</sup>, António Mata<sup>1,2,3</sup>, Luís Azevedo<sup>4,5</sup>, Joana Faria Marques<sup>1,2,3</sup>, João Silveira<sup>1,2,3</sup>, Duarte Marques<sup>1,2,3</sup>

1. Biology and Oral Biochemistry Group, Faculty of Dental Medicine, University of Lisbon, 1649-003, Lisbon, Portugal.
2. Center for Evidence-Based Dental Medicine, Faculty of Dental Medicine, University of Lisbon, 1649-003, Lisbon, Portugal.
3. LIBPhys-FCT UID/FIS/04559/2013, Faculty of Dental Medicine, University of Lisbon, 1649-003, Lisbon, Portugal.
4. Faculty of Medicine, University of Porto – Department of Community Medicine, Information and Decision in Health (MEDCIDS@FMUP), 4200-450 Porto, Portugal.
5. Center for Health Technology and Services Research & Associate Laboratory – Health Research Network (CINTESIS@RISE), 4200-450 Porto, Portugal.

|                                                                                                                                                                                       |            |
|---------------------------------------------------------------------------------------------------------------------------------------------------------------------------------------|------------|
| <b>APPENDIX 1: PRISMA CHECKLIST.....</b>                                                                                                                                              | <b>3</b>   |
| <b>APPENDIX 2: SEARCH STRATEGY.....</b>                                                                                                                                               | <b>7</b>   |
| <b>APPENDIX 3: TABLE OF EXCLUDED STUDIES.....</b>                                                                                                                                     | <b>8</b>   |
| <b>APPENDIX 4: DATA ITEMS .....</b>                                                                                                                                                   | <b>9</b>   |
| 4.1. Main variables of the included studies.....                                                                                                                                      | 9          |
| 4.2. Data according to group and outcome .....                                                                                                                                        | 13         |
| <b>APPENDIX 5: STATISTICAL METHODS IN DETAIL .....</b>                                                                                                                                | <b>20</b>  |
| <b>APPENDIX 6: RISK OF BIAS ACROSS STUDIES, PUBLICATION BIAS AND<br/>EVALUATION OF THE CONFIDENCE IN THE RESULTS OF THE<br/>NETWORK META-ANALYSIS USING THE CINEMA FRAMEWORK.....</b> | <b>37</b>  |
| <b>APPENDIX 7: FLOW DIAGRAM SUMMARIZING THE SEARCH STRATEGY<br/>AND STUDY SELECTION.....</b>                                                                                          | <b>86</b>  |
| <b>APPENDIX 8: SUMMARY OF THE INCLUDED RCTS.....</b>                                                                                                                                  | <b>89</b>  |
| <b>APPENDIX 9: RISK OF BIAS WITHIN INDIVIDUAL STUDIES .....</b>                                                                                                                       | <b>102</b> |
| 9.1. Risk of bias in individual studies .....                                                                                                                                         | 102        |
| 9.2. Overall appraisal of included studies.....                                                                                                                                       | 118        |
| <b>APPENDIX 10: SIDE ANALYSIS.....</b>                                                                                                                                                | <b>119</b> |
| <b>REFERENCES .....</b>                                                                                                                                                               | <b>127</b> |

# Appendix 1: PRISMA checklist

## PRISMA NMA Checklist of Items to Include When Reporting A Systematic Review Involving a Network Meta-analysis

| Section/Topic             | Item # | Checklist Item                                                                                                                                                                                                                                                                                                                                                                                                                                                                                                                                                                                                                                                                                                                                                                           | Reported on Page # |
|---------------------------|--------|------------------------------------------------------------------------------------------------------------------------------------------------------------------------------------------------------------------------------------------------------------------------------------------------------------------------------------------------------------------------------------------------------------------------------------------------------------------------------------------------------------------------------------------------------------------------------------------------------------------------------------------------------------------------------------------------------------------------------------------------------------------------------------------|--------------------|
| <b>TITLE</b>              |        |                                                                                                                                                                                                                                                                                                                                                                                                                                                                                                                                                                                                                                                                                                                                                                                          |                    |
| Title                     | 1      | Identify the report as a systematic review <i>incorporating a network meta-analysis (or related form of meta-analysis)</i> .                                                                                                                                                                                                                                                                                                                                                                                                                                                                                                                                                                                                                                                             | 1                  |
| <b>ABSTRACT</b>           |        |                                                                                                                                                                                                                                                                                                                                                                                                                                                                                                                                                                                                                                                                                                                                                                                          |                    |
| Structured summary        | 2      | Provide a structured summary including, as applicable:<br><b>Background:</b> main objectives<br><b>Methods:</b> data sources; study eligibility criteria, participants, and interventions; study appraisal; and <i>synthesis methods, such as network meta-analysis</i> .<br><b>Results:</b> number of studies and participants identified; summary estimates with corresponding confidence/credible intervals; <i>treatment rankings may also be discussed. Authors may choose to summarize pairwise comparisons against a chosen treatment included in their analyses for brevity</i> .<br><b>Discussion/Conclusions:</b> limitations; conclusions and implications of findings.<br><b>Other:</b> primary source of funding; systematic review registration number with registry name. | 2                  |
| <b>INTRODUCTION</b>       |        |                                                                                                                                                                                                                                                                                                                                                                                                                                                                                                                                                                                                                                                                                                                                                                                          |                    |
| Rationale                 | 3      | Describe the rationale for the review in the context of what is already known, <i>including mention of why a network meta-analysis has been conducted</i> .                                                                                                                                                                                                                                                                                                                                                                                                                                                                                                                                                                                                                              | 3                  |
| Objectives                | 4      | Provide an explicit statement of questions being addressed, with reference to participants, interventions, comparisons, outcomes, and study design (PICOS).                                                                                                                                                                                                                                                                                                                                                                                                                                                                                                                                                                                                                              | 3                  |
| <b>METHODS</b>            |        |                                                                                                                                                                                                                                                                                                                                                                                                                                                                                                                                                                                                                                                                                                                                                                                          |                    |
| Protocol and registration | 5      | Indicate whether a review protocol exists and if and where it can be accessed (e.g., Web address); and, if available, provide registration information, including registration number.                                                                                                                                                                                                                                                                                                                                                                                                                                                                                                                                                                                                   | 3                  |
| Eligibility criteria      | 6      | Specify study characteristics (e.g., PICOS, length of follow-up) and report characteristics (e.g., years considered, language, publication status) used as criteria for eligibility, giving rationale. <i>Clearly</i>                                                                                                                                                                                                                                                                                                                                                                                                                                                                                                                                                                    | 3                  |

|                                        |           |                                                                                                                                                                                                                                                                                                                                                                                                                        |   |
|----------------------------------------|-----------|------------------------------------------------------------------------------------------------------------------------------------------------------------------------------------------------------------------------------------------------------------------------------------------------------------------------------------------------------------------------------------------------------------------------|---|
|                                        |           | <i>describe eligible treatments included in the treatment network, and note whether any have been clustered or merged into the same node (with justification).</i>                                                                                                                                                                                                                                                     |   |
| Information sources                    | 7         | Describe all information sources (e.g., databases with dates of coverage, contact with study authors to identify additional studies) in the search and date last searched.                                                                                                                                                                                                                                             | 4 |
| Search                                 | 8         | Present full electronic search strategy for at least one database, including any limits used, such that it could be repeated.                                                                                                                                                                                                                                                                                          | 4 |
| Study selection                        | 9         | State the process for selecting studies (i.e., screening, eligibility, included in systematic review, and, if applicable, included in the meta-analysis).                                                                                                                                                                                                                                                              | 5 |
| Data collection process                | 10        | Describe method of data extraction from reports (e.g., piloted forms, independently, in duplicate) and any processes for obtaining and confirming data from investigators.                                                                                                                                                                                                                                             | 5 |
| Data items                             | 11        | List and define all variables for which data were sought (e.g., PICOS, funding sources) and any assumptions and simplifications made.                                                                                                                                                                                                                                                                                  | 5 |
| <b>Geometry of the network</b>         | <b>S1</b> | Describe methods used to explore the geometry of the treatment network under study and potential biases related to it. This should include how the evidence base has been graphically summarized for presentation, and what characteristics were compiled and used to describe the evidence base to readers.                                                                                                           | 5 |
| Risk of bias within individual studies | 12        | Describe methods used for assessing risk of bias of individual studies (including specification of whether this was done at the study or outcome level), and how this information is to be used in any data synthesis.                                                                                                                                                                                                 | 5 |
| Summary measures                       | 13        | State the principal summary measures (e.g., risk ratio, difference in means). <i>Also describe the use of additional summary measures assessed, such as treatment rankings and surface under the cumulative ranking curve (SUCRA) values, as well as modified approaches used to present summary findings from meta-analyses.</i>                                                                                      | 5 |
| Planned methods of analysis            | 14        | Describe the methods of handling data and combining results of studies for each network meta-analysis. This should include, but not be limited to: <ul style="list-style-type: none"> <li>• <i>Handling of multi-arm trials;</i></li> <li>• <i>Selection of variance structure;</i></li> <li>• <i>Selection of prior distributions in Bayesian analyses; and</i></li> <li>• <i>Assessment of model fit.</i></li> </ul> | 5 |
| <b>Assessment of Inconsistency</b>     | <b>S2</b> | Describe the statistical methods used to evaluate the agreement of direct and indirect evidence in the treatment network(s) studied. Describe efforts taken to address its presence when found.                                                                                                                                                                                                                        | 6 |
| Risk of bias across studies            | 15        | Specify any assessment of risk of bias that may affect the cumulative evidence (e.g., publication bias, selective reporting within studies).                                                                                                                                                                                                                                                                           | 6 |

|                     |    |                                                                                                                                                                                                                                                                                                                                                                                                                                                   |   |
|---------------------|----|---------------------------------------------------------------------------------------------------------------------------------------------------------------------------------------------------------------------------------------------------------------------------------------------------------------------------------------------------------------------------------------------------------------------------------------------------|---|
| Additional analyses | 16 | Describe methods of additional analyses if done, indicating which were pre-specified. This may include, but not be limited to, the following: <ul style="list-style-type: none"> <li>• Sensitivity or subgroup analyses;</li> <li>• Meta-regression analyses;</li> <li>• <i>Alternative formulations of the treatment network; and</i></li> <li>• <i>Use of alternative prior distributions for Bayesian analyses (if applicable).</i></li> </ul> | 6 |
|---------------------|----|---------------------------------------------------------------------------------------------------------------------------------------------------------------------------------------------------------------------------------------------------------------------------------------------------------------------------------------------------------------------------------------------------------------------------------------------------|---|

## RESULTS†

|                                          |           |                                                                                                                                                                                                                                                                                                                                                                                                                                                              |    |
|------------------------------------------|-----------|--------------------------------------------------------------------------------------------------------------------------------------------------------------------------------------------------------------------------------------------------------------------------------------------------------------------------------------------------------------------------------------------------------------------------------------------------------------|----|
| Study selection                          | 17        | Give numbers of studies screened, assessed for eligibility, and included in the review, with reasons for exclusions at each stage, ideally with a flow diagram.                                                                                                                                                                                                                                                                                              | 6  |
| <b>Presentation of network structure</b> | <b>S3</b> | Provide a network graph of the included studies to enable visualization of the geometry of the treatment network.                                                                                                                                                                                                                                                                                                                                            | 19 |
| <b>Summary of network geometry</b>       | <b>S4</b> | Provide a brief overview of characteristics of the treatment network. This may include commentary on the abundance of trials and randomized patients for the different interventions and pairwise comparisons in the network, gaps of evidence in the treatment network, and potential biases reflected by the network structure.                                                                                                                            | 6  |
| Study characteristics                    | 18        | For each study, present characteristics for which data were extracted (e.g., study size, PICOS, follow-up period) and provide the citations.                                                                                                                                                                                                                                                                                                                 | 6  |
| Risk of bias within studies              | 19        | Present data on risk of bias of each study and, if available, any outcome level assessment.                                                                                                                                                                                                                                                                                                                                                                  | 7  |
| Results of individual studies            | 20        | For all outcomes considered (benefits or harms), present, for each study: 1) simple summary data for each intervention group, and 2) effect estimates and confidence intervals. <i>Modified approaches may be needed to deal with information from larger networks.</i>                                                                                                                                                                                      | 7  |
| Synthesis of results                     | 21        | Present results of each meta-analysis done, including confidence/credible intervals. <i>In larger networks, authors may focus on comparisons versus a particular comparator (e.g. placebo or standard care), with full findings presented in an appendix. League tables and forest plots may be considered to summarize pairwise comparisons.</i> If additional summary measures were explored (such as treatment rankings), these should also be presented. | 7  |
| <b>Exploration for inconsistency</b>     | <b>S5</b> | Describe results from investigations of inconsistency. This may include such information as measures of model fit to compare consistency and inconsistency models, <i>P</i> values from statistical tests,                                                                                                                                                                                                                                                   | 8  |

|                                |    |                                                                                                                                                                                                                                                                                                                                                                                                                                |    |
|--------------------------------|----|--------------------------------------------------------------------------------------------------------------------------------------------------------------------------------------------------------------------------------------------------------------------------------------------------------------------------------------------------------------------------------------------------------------------------------|----|
|                                |    | or summary of inconsistency estimates from different parts of the treatment network.                                                                                                                                                                                                                                                                                                                                           |    |
| Risk of bias across studies    | 22 | Present results of any assessment of risk of bias across studies for the evidence base being studied.                                                                                                                                                                                                                                                                                                                          | 7  |
| Results of additional analyses | 23 | Give results of additional analyses, if done (e.g., sensitivity or subgroup analyses, meta-regression analyses, <i>alternative network geometries studied, alternative choice of prior distributions for Bayesian analyses</i> , and so forth).                                                                                                                                                                                | 8  |
| <b>DISCUSSION</b>              |    |                                                                                                                                                                                                                                                                                                                                                                                                                                |    |
| Summary of evidence            | 24 | Summarize the main findings, including the strength of evidence for each main outcome; consider their relevance to key groups (e.g., healthcare providers, users, and policy-makers).                                                                                                                                                                                                                                          | 9  |
| Limitations                    | 25 | Discuss limitations at study and outcome level (e.g., risk of bias), and at review level (e.g., incomplete retrieval of identified research, reporting bias). <i>Comment on the validity of the assumptions, such as transitivity and consistency. Comment on any concerns regarding network geometry (e.g., avoidance of certain comparisons).</i>                                                                            | 10 |
| Conclusions                    | 26 | Provide a general interpretation of the results in the context of other evidence, and implications for future research.                                                                                                                                                                                                                                                                                                        | 11 |
| <b>FUNDING</b>                 |    |                                                                                                                                                                                                                                                                                                                                                                                                                                |    |
| Funding                        | 27 | Describe sources of funding for the systematic review and other support (e.g., supply of data); role of funders for the systematic review. This should also include information regarding whether funding has been received from manufacturers of treatments in the network and/or whether some of the authors are content experts with professional conflicts of interest that could affect use of treatments in the network. | 12 |

PICOS = population, intervention, comparators, outcomes, study design.

\* Text in italics indicates wording specific to reporting of network meta-analyses that has been added to guidance from the PRISMA statement.

† Authors may wish to plan for use of appendices to present all relevant information in full detail for items in this section.

## Appendix 2: Search strategy

Algorithm MEDLINE (via PubMed)

# 1 (“gingivitis” [MeSH Terms] OR “periodontal disease” [MeSH Terms] OR “periodontitis” [MeSH Terms] OR “alveolar bone loss” [MeSH Terms] OR “chronic periodontitis” [MeSH Terms])

# 2 (“oral conditions” [Text Word] OR “dental plaque” [MeSH Terms] OR “oral hygiene” [Text Word] OR “tooth diseases” [All fields])

# 3 (#1) OR (#2)

# 4 (“probiotic\*” [MeSH Terms] OR “probiotic\*” [All Fields]) OR “prebiotic\*” [All Fields] OR “symbiotic\*” [All Fields]

# 5 “Bifidobacterium” [All Fields] OR “Lactobacillus” [All Fields] OR “Streptococcus” [All Fields] OR “Bacillus” [All Fields]

# 6 (#4) OR (#5)

# 7 (#3) AND (#6)

## Appendix 3: Table of excluded studies

Table 2 - Table of excluded studies.

| Author (year)                 | Reason for exclusion |
|-------------------------------|----------------------|
| Szkaradkiewicz et al. (2014)  | 7                    |
| Mani et al. (2017)            | 7                    |
| Shimauchi et al. (2008)       | 7                    |
| Dhawan et al. (2013)          | 4                    |
| Grusovin et al. (2020)        | 4                    |
| Kuru et al. (2017)            | 4                    |
| Khoramian et al. (2020)       | 4                    |
| Alanzi et al. (2018)          | 4                    |
| Deshmukh et al. 2017          | 4                    |
| Jung et al. (2014)            | 5                    |
| Shah et al. 2013              | 4                    |
| Boia et al. 2019              | 5                    |
| Nagarajappa et al. (2015)     | 4                    |
| Carvalho et al. (2005)        | 5                    |
| Tobita et al. (2018)          | 4                    |
| Harper et al. (1990)          | 4                    |
| Tyagi et al. (2011)           | 5                    |
| Flemmig et al. (2011)         | 5                    |
| Hirota et al. (2011)          | 4                    |
| Fujiwara et al. (2019)        | 4                    |
| Mayanagi et al. (2009)        | 4                    |
| Botelho et al. (2009)         | 4                    |
| Bae et al. (2006)             | 4                    |
| Iwasaki et al. (2016)         | 4                    |
| Marttinen et al. (2012)       | 4                    |
| Ten Bruggencate et al. (2014) | 4                    |
| Pedrazzoli et al. (1992)      | 5                    |
| Okuda et al. (1992)           | 5                    |
| Feres et al. (1999)           | 5                    |
| Thomas et al. (1998)          | 5                    |
| Fonseca et al. (2015)         | 5                    |
| Twetman et al. (2009)         | 4                    |
| Kang et al. (2020)            | 4                    |
| Grudianov et al. (2002)       | 2                    |
| Imran et al. (2015)           | 2                    |
| Pozharitskaia et al. (1994)   | 2                    |
| Nędzi-Góra et al. (2020)      | 4                    |
| Matsuoka et al. (2005)        | 2                    |
| Kerdar et al. (2019)          | 2                    |
| Laleman et al. (2019)         | 4                    |
| Keller et al. (2017)          | 4                    |
| Jain I et al. (2016)          | 6                    |
| Schaeken et al. (1996)        | 4                    |
| Fine et al. (2000)            | 4                    |
| Stomatologia et al. (2002)    | 2                    |
| Koll-Klais et al. (2005)      | 2                    |
| Ishikawa et al. (2003)        | 2                    |
| Baca-Castanõn et al. (2015)   | 2                    |
| Mackawa et a. (2014)          | 2                    |
| Matsuoka et al. (2006)        | 2                    |
| Montalto et al. (2004)        | 4                    |
| Mousques et al. (1980)        | 1                    |

|                            |   |
|----------------------------|---|
| Oh et al. (2017)           | 5 |
| Zahradnik et al. (2009)    | 4 |
| Schlagenhauf et al. (2020) | 4 |
| Vohra et al. (2020)        | 3 |
| Patyna et al. (2021)       | 2 |
| Godowski et al. (1995)     | 5 |
| Bhavana et al. (2017)      | 5 |
| Riccia et al. (2007)       | 2 |
| Yuki O, et al. (2019)      | 3 |
| Sajedinejad et al. (2017)  | 2 |
| Sinulingga et al. (2019)   | 2 |
| Ann et al. (2017)          | 5 |
| Monaca et al. (2023)       | 1 |

(1) studies lacking essential data required for a meta-analysis; (2) non-randomized clinical studies, cohort studies, and case series; (3) studies involving patients with systemic diseases (HIV/AIDS or diabetes) or intellectual disabilities; (4) studies focused on forms of periodontal disease other than chronic periodontitis, patients in periodontal supportive therapy, or healthy volunteers; (5) studies examining therapies other than probiotics; (6) studies targeting children, adolescents, or the elderly population; (7) studies failing to meet the transitivity assumption.



## Appendix 4: Data items

### 4.1. Main variables of the included studies

Table 3 – Main variables of the included studies

| studlab                                                                     | study design                                    | population/diagnostic criteria                                                                                                                                                                                                          | intervention                                                         | comparison                                     | outcomes               | smoking habits  | follow-up period |
|-----------------------------------------------------------------------------|-------------------------------------------------|-----------------------------------------------------------------------------------------------------------------------------------------------------------------------------------------------------------------------------------------|----------------------------------------------------------------------|------------------------------------------------|------------------------|-----------------|------------------|
| Abuazab2021(Abuazab, El-Shinnawi, & El-Daker, 2021)                         | clinical study                                  | PPD $\geq$ 4 mm and CAL 3-4mm.                                                                                                                                                                                                          | Group I: SRP + probiotic                                             | Group II: SRP + CHX gel<br>Group III: SRP only | CAL, PPD, PI, CFU      | All non-smokers | 6 weeks          |
| Alshareef2020(Alshareef et al., 2020)                                       | RCT                                             | Moderate to severe chronic periodontitis (CAL $\geq$ 3 mm)                                                                                                                                                                              | SRP + probiotic                                                      | SRP alone                                      | CAL, PPD, PI, BOP      | NR              | 30 days          |
| Butera2020(Butera et al., 2020)                                             | RCT, parallel                                   | Presence of periodontal disease (stage II–III)                                                                                                                                                                                          | SRP + Probiotic toothpaste<br>SRP + Probiotic toothpaste+chewing gum | SRP + Curasept CHX toothpaste                  | CAL, PPD, PI, BOP, CFU | NR              | 6 months         |
| Chandra2016(Chandra et al., 2016)                                           | RCT                                             | At least two periodontal pockets $\geq$ 5 mm with at least one pocket in each quadrant were included in the study.                                                                                                                      | SRP + probiotic                                                      | SRP                                            | CAL, PPD, PI           | All non-smokers | 6 months         |
| Costacurta2018(Costacurta, Sicuro, Margiotta, Ingrassiotta, & Docimo, 2018) | RCT, parallel                                   | Chronic periodontitis, show for each quadrant at least two elements with PPD $\geq$ 4 mm and positive BOP.                                                                                                                              | SRP + probiotic                                                      | SRP alone                                      | CAL, PPD, BOP          | NR              | 4 weeks          |
| deOliveira2022(de Oliveira, Lourenco, & Colombo, 2022)                      | RCT, parallel, double-blind, placebo-controlled | Stage I–III periodontitis<br>Inclusion criteria were: aged $\geq$ 18 years; $\geq$ 12 teeth; non-smokers; and untreated periodontitis with $\geq$ 1 site with PPD $\geq$ 6mm and $\geq$ 2 sites with PPD $\geq$ 5mm in different teeth. | SRP + probiotic                                                      | SRP + placebo                                  | CAL, PPD, BOP          | All non-smokers | 2 months         |
| Dhaliwal2017(Dhaliwal, Grover, Malhotra, & Kapoor, 2017)                    | RCT                                             | Patients having moderate to severe chronic generalized periodontitis ( $\geq$ 3 mm clinical attachment loss involving $>$ 30% of sites)                                                                                                 | SRP + probiotic                                                      | SRP alone                                      | CAL, PPD, PI, CFU      | NR              | 3 months         |
| El-bagoory2021(El-Bagoory, El-Guindy, Shoukheba, & El-Zamarany, 2021)       | RCT; prospective; single-blind                  | Moderate chronic periodontitis according to Armitage criteria; having at minimum two teeth with one proximal site with ( [CAL]) of 3–4 mm, and ( [PPD]) of 5–6 mm; horizontal bone erosion by panoramic radiography.                    | SRP + probiotic                                                      | SRP alone                                      | CAL, PPD, CFU          | All non-smokers | 6 months         |
| Ghasemi2020(Ghasemi, Babaloo, Mohammadi, & Esmailzadeh, 2020)               | RCT                                             | Definitive diagnosis of chronic periodontitis, at least 4 teeth with a PPD of $\geq$ 5 mm, and a CAL of $\geq$ 4 mm.                                                                                                                    | SRP + probiotic                                                      | SRP + placebo                                  | CAL PPD, PI, BOP       | All non-smokers | 3 months         |

|                                                                                         |                                                  |                                                                                                                                                                                                                                                                                                                                                      |                                                                                         |                  |                       |                 |          |
|-----------------------------------------------------------------------------------------|--------------------------------------------------|------------------------------------------------------------------------------------------------------------------------------------------------------------------------------------------------------------------------------------------------------------------------------------------------------------------------------------------------------|-----------------------------------------------------------------------------------------|------------------|-----------------------|-----------------|----------|
| <b>Grover(Grover)</b>                                                                   | [thesis file]                                    | Patients suffering from moderate to severe chronic generalized periodontitis ( $\geq 3$ mm clinical attachment loss involving $>30\%$ of sites).                                                                                                                                                                                                     | SRP + probiotic                                                                         | SRP alone        | CAL, PPD, PI, CFU     | NR              | 3 months |
| <b>Ikram2019(Ikram et al., 2019)</b>                                                    | RCT, double-blind, placebo-controlled            | Subjects from both genders, age $\geq 30$ years, who were systemically healthy with clinically diagnosed CP, having pocket depth of $\geq 4$ mm were included in the study.                                                                                                                                                                          | SRP + probiotic                                                                         | SRP + placebo    | CAL PPD, PI, BOP      | All non-smokers | 84 dias  |
| <b>Ince2015(Ince et al., 2015)</b>                                                      | RCT, parallell, double-blind, placebo-controlled | Chronic periodontitis 23 patients with radiographically detected horizontal bone loss, the presence of at least 2 teeth with na approximal site each with a PD of 5-7 mm and a GI of $\geq 2$ in each quadrant.                                                                                                                                      | SRP + probiotic                                                                         | SRP + placebo    | PPD, PI, BOP          | All non-smokers | 1 year   |
| <b>Invernici2018(Invernici et al., 2018)</b>                                            | RCT, parallell, double-blind, placebo-controlled | 30% or more of the sites with PPD $\geq 4$ mm and CAL $\geq 4$ mm, (4) presence of bleeding on probing (BOP) and a minimum of five teeth with at least one site with CAL and PPD $\geq 5$ mm. All patients had to be in good general health.                                                                                                         | SRP + probiotic                                                                         | SRP + placebo    | CAL PPD, PI, BOP      | All non-smokers | 90 days  |
| <b>Invernici2020(Invernici et al., 2020)</b>                                            | RCT, parallell, double-blind, placebo-controlled | 30% or more of the sites with PPD $\geq 4$ mm and CAL $\geq 4$ mm, (4) presence of bleeding on probing (BOP) and a minimum of five teeth with at least one site with CAL and PPD $\geq 5$ mm. All patients had to be in good general health.                                                                                                         | SRP + probiotic                                                                         | SRP + placebo    | PI, BOP               | All non-smokers | 90 days  |
| <b>Jebin2021(Jebin, Nisha, &amp; Padmanabhan, 2021)</b>                                 | RCT, parallell, double-blind                     | Patients with Stage II/Stage III and Grade A/Grade B periodontitis according to the American Academy of Periodontology 2018 classification with CAL 3–6 mm in at least 2 quadrants, presence of at least 16 remaining teeth with a minimum of four teeth in each quadrant, presence of at least single tooth with PPD 5–7 mm in minimum 2 quadrants. | SRP + probiotic                                                                         | SRP alone        | CAL, PPD, PI, CFU     | All non-smokers | 3 months |
| <b>Kanagaraj2019(Kanagaraj, Elavarasu, Thangavelu, Subaramoniam, &amp; Dutta, 2019)</b> | Single-blind, RCT, prospective                   | Moderate chronic periodontitis, as defined by probing depth $\geq 4$ mm to $\leq 7$ mm and generalized interproximal attachment loss were considered in the study.                                                                                                                                                                                   | SRP + probiotic                                                                         | SRP + placebo    | CAL PPD, PI, BOP, CFU | All non-smokers | 6 weeks  |
| <b>Kumar2021(Kumar et al., 2021)</b>                                                    | RCT, parallell, double-blind, placebo-controlled | Generalized CP with a minimum of 3 natural teeth in each quadrant (excluding third molars), with at least 1 site having a mean PPD $\geq 5$ mm, a CAL $\geq 4$ mm, and presence of BOP                                                                                                                                                               | SRP+single application of probiotic (G2); SRP+incremental application of probiotic (G3) | SRP+placebo (G1) | CAL PPD, PI, BOP      | All non-smokers | 24 weeks |
| <b>Laleman2015(Laleman et al., 2015)</b>                                                | RCT, parallell, double-blind,                    | Previously untreated moderate to severe generalized adult periodontitis (Van der Velden 2005). - $\geq 14$ teeth; $\geq 36$ years; moderate = bone loss $> 1/3$ and $\leq 1/2$ of the root length or attachment loss 4–5 mm;                                                                                                                         | SRP + probiotic                                                                         | SRP + placebo    | CAL, PPD, BOP         | NR              | 24 weeks |

|                                                              |                                                   |                                                                                                                                                                                                                                                                                                     |                 |               |                            |                         |           |
|--------------------------------------------------------------|---------------------------------------------------|-----------------------------------------------------------------------------------------------------------------------------------------------------------------------------------------------------------------------------------------------------------------------------------------------------|-----------------|---------------|----------------------------|-------------------------|-----------|
|                                                              | placebo-controlled                                | severe = bone loss > 1/2 of the root length or attachment loss $\geq$ 6 mm                                                                                                                                                                                                                          |                 |               |                            |                         |           |
| <b>Meenakshi2020(Meenakshi &amp; Varghese, 2018)</b>         | NR                                                | Patients with moderate periodontitis with a pocket depth <6 mm.                                                                                                                                                                                                                                     | SRP + probiotic | SRP alone     | CAL, PPD, PI, CFU          | All non-smokers         | 1 month   |
| <b>Minic2020(Minic, Pejic, &amp; Bradic-Vasic, 2022)</b>     | RCT, prospective study                            | Have periodontal pockets depth $\geq$ 5 mm (at least two sites per tooth: mesial and mesiobuccal on maxillary and mandible part).                                                                                                                                                                   | SRP + probiotic | SRP alone     | PPD, PI, BOP               | NR                      | 30 days   |
| <b>Morales2016(Morales et al., 2016)</b>                     | RCT, parallel, double-blind, placebo-controlled   | Chronic periodontitis was defined as having at least five teeth with periodontal sites with pocket probing depth (PPD) $\geq$ 5mm and CAL $\geq$ 3 mm, 20% BOP and extensive radiographically determined bone loss.                                                                                 | SRP + probiotic | SRP + placebo | CAL PPD, PI, BOP           | NR                      | 12 months |
| <b>Oliveira2021(Oliveira, Lourenço, &amp; Colombo, 2021)</b> | RCT, double-blind, placebo-controlled prospective | Inclusion criteria were: $\geq$ 18 years of age; $\geq$ 12 teeth; non-smokers; and untreated periodontitis with $\geq$ 1 site with PPD $\geq$ 6 mm and $\geq$ 2 sites with PPD $\geq$ 5 mm in different teeth.                                                                                      | SRP + probiotic | SRP + placebo | CAL, PPD, PI, BOP, CFU     | NR                      | 2 months  |
| <b>Özener2023(Ozener, Kuru, Kadir, &amp; Kuru, 2023)</b>     | RCT, double-blind, placebo-controlled             | 30 chronic periodontitis patients that are considered under stage III grade B; the presence of at least 2 teeth with one approximal site having a PPD of 4–6 mm and a GI of $\geq$ 2 in each quadrant                                                                                               | SRP + probiotic | SRP + placebo | PPD, PI, GI, CAL, BOP, CFU | All non-smokers         | 3 months  |
| <b>Paul2019(Paul, Gandhimadhi, &amp; Babu, 2019)</b>         | RCT, double-blind, placebo-controlled             | Mild-to-moderate chronic periodontitis, as defined by PPD 5–7 mm in >30% of the probing sites, having a minimum of 16 remaining natural teeth (minimum of at least four teeth per quadrant) were included.                                                                                          | SRP + probiotic | SRP + placebo | CAL PPD, PI, BOP, CFU      | All non-smokers         | 12 weeks  |
| <b>Pelekos2020(Pelekos et al., 2020)</b>                     | RCT, parallel, double-blind, placebo-controlled   | Stage III and IV of periodontitis (presence of at least 2 probing sites in PPD $\geq$ 5mm and radiographically determined bone loss)                                                                                                                                                                | SRP + probiotic | SRP + placebo | CAL, PPD, BOP              | All non-smokers         | 180 days  |
| <b>Penala2016(Penala et al., 2016)</b>                       | RCT, parallel, double-blind, placebo-controlled   | Chronic periodontitis clinically evident with at least 4 teeth showing PPD $\geq$ 5 mm, CAL $\geq$ 4 mm, and with clinically perceptible halitosis were included.                                                                                                                                   | SRP + probiotic | SRP + placebo | CAL PPD, PI, BOP           | All non-smokers         | 3 months  |
| <b>Pudgar2021(Pudgar et al., 2021)</b>                       | RCT, parallel, double-blind,                      | Advanced periodontitis with a PPD of $\geq$ 5 mm on at least four teeth in four different quadrants (stage III or IV according to the AAP/EFP classification of 2018), has stable occlusion and with the presence of at least 16 teeth of which at least 12 were scorable (excluding third molars). | SRP + probiotic | SRP + placebo | CAL PPD, PI, BOP           | Smokers and non-smokers | 3 months  |

|                                                                       |                                                 |                                                                                                                                                                                                                                                                                                                                                                                                                |                                                                         |                                                                                           |                        |                 |          |
|-----------------------------------------------------------------------|-------------------------------------------------|----------------------------------------------------------------------------------------------------------------------------------------------------------------------------------------------------------------------------------------------------------------------------------------------------------------------------------------------------------------------------------------------------------------|-------------------------------------------------------------------------|-------------------------------------------------------------------------------------------|------------------------|-----------------|----------|
|                                                                       | placebo-controlled                              |                                                                                                                                                                                                                                                                                                                                                                                                                |                                                                         |                                                                                           |                        |                 |          |
| <b>Ranjith2021(Ranjith, Nazimudeen, &amp; Baiju, 2022)</b>            | RCT, triple-blind, parallel                     | Inclusion criteria: Systemically healthy patients of age >30 years; Generalized Stage II periodontitis; Bleeding on probing in at least 30% sites; Non-smokers or who stopped smoking for at least 6 months CAL 3 to 4mm; Radiographic bone loss coronal third (15% to 33%); No tooth loss due to periodontitis; Maximum probing depth ≤5mm. Mostly horizontal bone loss.                                      | SRP + probiotic                                                         | SRP + placebo                                                                             | CAL PPD, PI            | All non-smokers | 90 days  |
| <b>Tekce2015(Tekce et al., 2015)</b>                                  | RCT, parallel, double-blind, placebo-controlled | Chronic periodontitis patients with radiographically detected horizontal bone loss (Armitage 1999), the presence of at least 2 teeth with one approximal site with a PD of 5–7 mm and a GI of ≥2 in each quadrant.                                                                                                                                                                                             | SRP + probiotic                                                         | SRP + placebo                                                                             | PPD, PI, BOP, CFU      | All non-smokers | 360 days |
| <b>Teughels2013(Teughels et al., 2013)</b>                            | RCT, parallel, double-blind, placebo-controlled | Previously untreated moderate to severe generalized adult periodontitis (Van der Velden 2005). - ≥ 14 teeth; ≥ 36 years; moderate = bone loss > 1/3 and ≤ 1/2 of the root length or attachment loss 4–5 mm; severe = bone loss > 1/2 of the root length or attachment loss ≥ 6 mm                                                                                                                              | SRP + probiotic                                                         | SRP + placebo                                                                             | CAL, PPD, PI, BOP, CFU | All non-smokers | 12 weeks |
| <b>Theodoro2019(Theodoro et al., 2019)</b>                            | RCT, parallel, placebo-controlled               | Diagnosis of severe generalised chronic periodontitis, with at least 6 teeth presenting at least 1 site each with PPD and CAL ≥5 mm, and at least 30% of sites with PD and CAL ≥4 mm and BOP (Armitage, 1999), being heavy smokers (more than 10 cigarettes per day for more than 5 years) (Ammenheuser et al., 1997), and at least 15 teeth in the mouth, excluding third molars.                             | SRP + probiotic                                                         | SRP + placebo                                                                             | CAL, PPD, BOP          | All smokers     | 90 days  |
| <b>Tsubura2009(Tsubura et al., 2009)</b>                              | RCT                                             | Chronic periodontitis (They also had at least 20 natural teeth, including at least eight sites with PPD>4 mm on molar teeth)                                                                                                                                                                                                                                                                                   | SRP + probiotic (Extraction 300E (containing Bacillus subtilis: E-300 ) | SRP + control (NG - Neosteline Green (NG), containing benzethonium chloride 0.2 g/100 ml) | PPD, BOP               | All non-smokers | 30 days  |
| <b>Vicario2013(Vicario, Santos, Violant, Nart, &amp; Giner, 2013)</b> | RCT, double-blind, placebo-controlled           | Chronic periodontitis according to the criteria at the 1999 International Classification by Armitage, good general health, stated availability throughout the entire study period and willingness and capacity to comply with the protocol. (Armitage)<br>Chronic Periodontitis (slight: 1-2 mm CAL; moderate: 3-4 mm CAL; severe: > 5 mm CAL)<br>A. Localized<br>B. Generalized (> 30% of sites are involved) | SRP + probiotic                                                         | SRP + placebo                                                                             | PPD, PI, BOP           | All non-smokers | 30 days  |

AL: attachment loss; BOP: bleeding on probing; CAL: clinical attachment level; CFU: colony forming units; CHX: chlorhexidine; CP: chronic periodontitis; GI: gingival index; NR: not reported; PI: plaque index; PPD: periodontal probing depth; RCT: randomized controlled trial; SRP: scaling and root planning.

## 4.2. Data according to group and outcome

Table 4

– Data according to group and outcome.

| studlab                                | sample size                                                         | Age ± SD                                                                | gender (M/F)                                                               | probiotic strain and concentration                                                                                                                                                            | form of administration     | duration of probiotic therapy | CAL (mm)                                                                                                                                                             | PPD (mm)                                                                                                                                                             | PI (%)                                                                                                                                                                           | BOP (%)                                                                                                                                                                          | CFU                                                                                                                                                                                                                                                                                                                                                                                                                                                                                                                                      | adverse effects | notes                                                                                                                                                                                                                                                                                      |
|----------------------------------------|---------------------------------------------------------------------|-------------------------------------------------------------------------|----------------------------------------------------------------------------|-----------------------------------------------------------------------------------------------------------------------------------------------------------------------------------------------|----------------------------|-------------------------------|----------------------------------------------------------------------------------------------------------------------------------------------------------------------|----------------------------------------------------------------------------------------------------------------------------------------------------------------------|----------------------------------------------------------------------------------------------------------------------------------------------------------------------------------|----------------------------------------------------------------------------------------------------------------------------------------------------------------------------------|------------------------------------------------------------------------------------------------------------------------------------------------------------------------------------------------------------------------------------------------------------------------------------------------------------------------------------------------------------------------------------------------------------------------------------------------------------------------------------------------------------------------------------------|-----------------|--------------------------------------------------------------------------------------------------------------------------------------------------------------------------------------------------------------------------------------------------------------------------------------------|
| Abuazab2021 (Abuazab et al., 2021)     | 30 (SRP:10; SRP+CHX:10 SRP+Prob:10)                                 | 30-50                                                                   | 12 males; 18 females                                                       | Bifidobacterium bifidum, EMCC #: 1334, Designation: DSM 20082, E 319f, JCM 12, isolated from intestine of adults and supplied as actively growing cultures.                                   | Gel                        | 6w                            | (SRP) Day 0: 2.78 ± 0.31; 6w: 2.25 ± 0.35; (SRP+CHX) Day 0: 2.57 ± 0.34; 6w: 1.96 ± 0.41; (SRP+prob) Day 0: 2.79 ± 0.34; 6w: 1.87 ± 0.41.                            | (SRP) Day 0: 3.28 ± 0.39; 6w: 1.92 ± 0.23; (SRP+CHX) Day 0: 3.06 ± 0.45; 6w: 1.97 ± 0.32; (SRP+prob) Day 0: 3.29 ± 0.39; 6w: 2.02 ± 0.42.                            | (SRP) Day 0: 2.33 ± 0.21; 6w: 0.826 ± 0.109; (SRP+CHX) Day 0: 2.49 ± 0.245; 6w: 0.889 ± 0.138; (SRP+prob) Day 0: 2.34 ± 0.24; 6w: 0.766 ± 0.096.                                 | Not reported                                                                                                                                                                     | (Pg) (SRP) Day 0: 29.0 ± 10.15; 6w: 17.0 ± 1.9; (SRP+CHX) Day 0: 28.0 ± 17.52; 6w: 9.0 ± 2.0; (SRP+prob) Day 0: 30.0 ± 14.43; 6w: 7.0 ± 1.4; (Pi) (SRP) Day 0: 32.0 ± 8.93; 6w: 19.0 ± 3.1; (SRP+CHX) Day 0: 33.0 ± 18.7; 6w: 12.0 ± 1.5; (SRP+prob) Day 0: 35.0 ± 11.28; 6w: 11.0 ± 2.5; (Total load) (SRP) Day 0: 965.0 ± 166.02; 6w: 612.0 ± 146.35; (SRP+CHX) Day 0: 884.0 ± 187.39; 6w: 581.0 ± 177.60; (SRP+prob) Day 0: 928.50 ± 183.88; 6w: 505 ± 174.42.                                                                        | None            | Also report data related to GI and total count of bacteria<br>Data from PI are presented in % but the method is not explained                                                                                                                                                              |
| Alshareef2020 (Alshareef et al., 2020) | 25 (SRP: 10; SRP+prob: 15)                                          | 29 ± 96                                                                 | Not reported                                                               | Each probiotic lozenge contains five bifid bacteria including Lactobacillus acidophilus, Lactobacillus casei, Bifidobacterium bifidum, Lactobacillus rhamnosus, and Lactobacillus salivarius. | Lozenges                   | not reported                  | (SRP) Day 0: 3.4930 ± 0.66101; 30d: 3.1490 ± 0.65514; (SRP+prob) Day 0: 3.5740 ± 0.58024; 30d: 3.1487 ± 0.59010.                                                     | (SRP) Day 0: 2.6130 ± 0.41508; 30d: 2.3380 ± 0.43235; (SRP+prob) Day 0: 2.5533 ± 0.23654; 30d: 2.1973 ± 0.27830.                                                     | (SRP) Day 0: 47.3250 ± 15.38717; 30d: 37.3160 ± 12.29990; (SRP+prob) Day 0: 44.0127 ± 10.06966; 30d: 35.7433 ± 15.18255.                                                         | (SRP) Day 0: 49.7550 ± 13.93193; 30d: 40.8200 ± 13.21242; (SRP+prob) Day 0: 40.7533 ± 9.58256; 30d: 32.1533 ± 8.50200.                                                           | Not reported                                                                                                                                                                                                                                                                                                                                                                                                                                                                                                                             | Not reported    | Also reported Unpaired t-test statistical comparisons of clinical parameters for both examined groups                                                                                                                                                                                      |
| Butera2020 (Butera et al., 2020)       | 60 (SRP+CHX: 20; SRP+probToothpaste:20; SRP+probToothpaste&gum: 20) | SRP+C<br>HX: 55<br>SRP+probToothpaste: 49<br>SRP+probToothpaste&gum: 55 | SRP+CHX: 9/11<br>SRP+probToothpaste: 13/7<br>SRP+probToothpaste&gum: 10/10 | Toothpaste: Bifidobacterium *, Lactobacillus *<br>Chewing gum: L. reuteri (SGL 01), L. salivarius (SGL 03), L. plantarum (SGL 07)                                                             | Toothpaste and chewing gum | 6m                            | (CHXtoothpaste) Day 0: 5.83 ± 1.87; 6m: 5.57 ± 1.72; (ProbToothpaste) Day 0: 5.64 ± 2.27; 6m: 4.44 ± 2.14; (ProbToothpaste+gum) Day 0: 5.36 ± 1.46; 6m: 3.46 ± 0.94. | (CHXtoothpaste) Day 0: 5.88 ± 1.26; 6m: 5.80 ± 1.08; (ProbToothpaste) Day 0: 5.67 ± 0.74; 6m: 4.46 ± 0.84; (ProbToothpaste+gum) Day 0: 5.57 ± 0.85; 6m: 3.52 ± 0.53. | (CHXtoothpaste) Day 0: 70.00 ± 26.56; 6m: 67.00 ± 22.33; (ProbToothpaste) Day 0: 68.50 ± 22.48; 6m: 34.15 ± 14.08; (ProbToothpaste+gum) Day 0: 70.50 ± 20.38; 6m: 28.50 ± 17.85. | (CHXtoothpaste) Day 0: 66.25 ± 17.23; 6m: 64.00 ± 14.01; (ProbToothpaste) Day 0: 67.00 ± 24.94; 6m: 33.00 ± 20.39; (ProbToothpaste+gum) Day 0: 66.15 ± 34.89; 6m: 21.50 ± 17.55. | (Aa) (CHXtoothpaste) Day 0: 1247.48 ± 1238.52; 6m: 1030.08 ± 1202.40; (ProbToothpaste) Day 0: 528 ± 1121.42; 6m: 734.5 ± 2076.09; (ProbToothpaste+gum) Day 0: 650.25 ± 1114.43; 6m: 406.2 ± 919.53; (Pg) (CHXtoothpaste) Day 0: 10530.55 ± 18424.41; 6m: 8479 ± 3974.44; (ProbToothpaste) Day 0: 9107.65 ± 21882.53; 6m: 7625.75 ± 22714.00; (ProbToothpaste+gum) Day 0: 11644.1 ± 23306.05; 6m: 7553.641 ± 15781.77; (Tf) (CHXtoothpaste) Day 0: 34012.51 ± 54134.03; 6m: 40990 ± 19938.19; (ProbToothpaste) Day 0: 57690.4 ± 90873.28; | Not reported    | Also reported data relative to Bleeding Score, Sulcus Bleeding Index, Approximal Plaque Index, Adherent Gingiva (distance between the mucogingival junction and the projection on the external surface of the bottom of the gingival sulcus), Gingival Recession and Pathological Sites.). |

|                                                 |                                 |                                         |                                             |                                                                                                                                                                                                                                                                                                                                                                                                                                                                                                       |         |                    |                                                                                                     |                                                                                                     |                                                                                            |                                                                                                                 |                                                                                                                                                                                                                                                                                                                                                                                                                                                                                                                                                                                                                                                                                                                                                                                                                                                                                                                                                                                 |                                                                                           |                                                                                      |
|-------------------------------------------------|---------------------------------|-----------------------------------------|---------------------------------------------|-------------------------------------------------------------------------------------------------------------------------------------------------------------------------------------------------------------------------------------------------------------------------------------------------------------------------------------------------------------------------------------------------------------------------------------------------------------------------------------------------------|---------|--------------------|-----------------------------------------------------------------------------------------------------|-----------------------------------------------------------------------------------------------------|--------------------------------------------------------------------------------------------|-----------------------------------------------------------------------------------------------------------------|---------------------------------------------------------------------------------------------------------------------------------------------------------------------------------------------------------------------------------------------------------------------------------------------------------------------------------------------------------------------------------------------------------------------------------------------------------------------------------------------------------------------------------------------------------------------------------------------------------------------------------------------------------------------------------------------------------------------------------------------------------------------------------------------------------------------------------------------------------------------------------------------------------------------------------------------------------------------------------|-------------------------------------------------------------------------------------------|--------------------------------------------------------------------------------------|
|                                                 |                                 |                                         |                                             |                                                                                                                                                                                                                                                                                                                                                                                                                                                                                                       |         |                    |                                                                                                     |                                                                                                     |                                                                                            |                                                                                                                 | 6m: 25656.4 ± 48302.74; (ProbToothpaste+gum) Day 0: 35091.9 ± 40463.06; 6m: 3929080 ± 66828.91; (Ti) (CHXtoothpaste) Day 0: 7339.82 ± 19922.95; 6m: 4651 ± 2158.87; (ProbToothpaste) Day 0: 5318 ± 10086.63; 6m: 10244.63 ± 15860.15; (ProbToothpaste+gum) Day 0: 5521.75 ± 18720.46; 6m: 6065.13 ± 19738.92; (Pi) (CHXtoothpaste) Day 0: 11018 ± 10208.32; 6m: 8830 ± 5617.44; (ProbToothpaste) Day 0: 9720.1 ± 2405.66; 6m: 3536 ± 5931.72; (ProbToothpaste+gum) Day 0: 7476.55 ± 4787.82; 6m: 2520.5 ± 2435.87; (Fn) (CHXtoothpaste) Day 0: 17607.3 ± 25342.18; 6m: 16298.82 ± 17212.96; (ProbToothpaste) Day 0: 19381.2 ± 10360.37; 6m: 7843.6 ± 5509.43; (ProbToothpaste+gum) Day 0: 18053 ± 10931.75; 6m: 7211.78 ± 5971.25; (Total Bacteria Count) (CHXtoothpaste) Day 0: 1648650 ± 2571189.00; 6m: 561150 ± 349477.80; (ProbToothpaste) Day 0: 1150665 ± 2270115.00; 6m: 535470 ± 306466.90; (ProbToothpaste+gum) Day 0: 808115 ± 1619913.00; 6m: 2097731 ± 5655579.00; |                                                                                           |                                                                                      |
| <b>Chandra2016(Chandra et al., 2016)</b>        | 30 (SRP: 27; SRP+prob:30)       | 25-50                                   | Not reported                                | (250 mg; Florafi x®, Unique Biotech, Hyderabad, India) + The probiotic was mixed with a prebiotic (fructooligosaccharide, FOS; Mitushi Pharma, Ahmedabad, India), in the ratio of 4:1 to induce growth and activity in <i>S. boulardii</i> . Briefly, 30 preparations of 1 g <i>S. boulardii</i> -FOS mixture were made by stirring 200 mg of FOS and 800 mg of probiotic with a spatula, containing approximately 5 billion colony forming units (CFU) of the yeast <i>Saccharomyces boulardii</i> . | Powder  | Single application | (SRP) Day 0: 3.52 ± 0.74; 6m: 1.80 ± 0.92; (SRP+prob) Day 0: 3.57 ± 0.74; 6m: 0.61 ± 0.58.          | (SRP) Day 0: 5.52 ± 0.74; 6m: 3.61 ± 0.97; (SRP+prob) Day 0: 5.66 ± 0.73; 6m: 2.19 ± 0.51.          | (SRP) Day 0: 1.79 ± 0.36; 6m: 0.92 ± 0.27; (SRP+prob) Day 0: 1.58 ± 0.34; 6m: 0.64 ± 0.28. | Not reported                                                                                                    | Not reported                                                                                                                                                                                                                                                                                                                                                                                                                                                                                                                                                                                                                                                                                                                                                                                                                                                                                                                                                                    | Not reported                                                                              | Also analyse Viability of <i>S. boulardii</i> in the gingival sulcus <i>in vitro</i> |
| <b>Costacurta2018(Costacurta et al., 2018)</b>  | 40 (SRP: 20; SRP+prob: 20)      | SRP: 51.8±14.94<br>SRP+prob: 41.3±11.85 | SRP: F:60%, M:40%<br>SRP+prob: F:40%, M:60% | probiotic containing 10 <sup>8</sup> CFU of <i>Lactobacillus reuteri</i> DSM 17938 and 10 <sup>8</sup> CFU of <i>Lactobacillus reuteri</i> ATCC PTA 5289                                                                                                                                                                                                                                                                                                                                              | Tablets | 4w                 | (SRP) Day 0: 4.95 ± 0.56; 4w: 4.3 ± 0.52; (SRP+prob) Day 0: 4.56 ± 0.94; 4w: 3.94 ± 0.85.           | (SRP) Day 0: 4.51 ± 0.54; 4w: 3.91 ± 0.50; (SRP+prob) Day 0: 4.12 ± 0.89; 4w: 3.47 ± 0.65.          | Not reported                                                                               | (SRP) Day 0: 88.45 ± 9.63; 4w: 58.15±10.38; (SRP+prob) Day 0: 87.5±14.75; 4w: 31.45±15.97.                      | Not reported                                                                                                                                                                                                                                                                                                                                                                                                                                                                                                                                                                                                                                                                                                                                                                                                                                                                                                                                                                    | Not reported                                                                              | -                                                                                    |
| <b>deOliveira2022(de Oliveira et al., 2022)</b> | 48 (SRP+plac: 23; SRP+prob: 19) | Not reported                            | Not reported                                | Dive strains of <i>Lactobacillus</i> spp. and three of <i>Bifidobacterium</i> spp.                                                                                                                                                                                                                                                                                                                                                                                                                    | Capsule | 1capsule/day (2m)  | (SRP+plac) Day 0: 3.18 ± 0.785; 2m: 2.89 ± 0.711; (SRP+prob) Day 0: 3.31 ± 0.830; 2m: 2.74 ± 0.844. | (SRP+plac) Day 0: 2.82 ± 0.460; 2m: 2.24 ± 0.207; (SRP+prob) Day 0: 3.00 ± 0.363; 2m: 2.36 ± 0.319. | Not reported                                                                               | (SRP+plac) Day 0: 45.10 ± 16.333; 2m: 24.70 ± 14.740; (SRP+prob) Day 0: 53.30 ± 24.148; 2m: 32.20 ± 17.111. (%) | Not reported                                                                                                                                                                                                                                                                                                                                                                                                                                                                                                                                                                                                                                                                                                                                                                                                                                                                                                                                                                    | Most patients reported feeling well during treatments; however, gastrointestinal symptoms | -                                                                                    |

|                                                |                                 |                                                    |                                          |                                                                                                                                                                                                                                                                                                                                                                                     |            |      |                                                                                                   |                                                                                                     |                                                                                                       |                                                                                                         |                                                                                                                                                                                                                                                                                                             |              |                                                                                                                |
|------------------------------------------------|---------------------------------|----------------------------------------------------|------------------------------------------|-------------------------------------------------------------------------------------------------------------------------------------------------------------------------------------------------------------------------------------------------------------------------------------------------------------------------------------------------------------------------------------|------------|------|---------------------------------------------------------------------------------------------------|-----------------------------------------------------------------------------------------------------|-------------------------------------------------------------------------------------------------------|---------------------------------------------------------------------------------------------------------|-------------------------------------------------------------------------------------------------------------------------------------------------------------------------------------------------------------------------------------------------------------------------------------------------------------|--------------|----------------------------------------------------------------------------------------------------------------|
|                                                |                                 |                                                    |                                          |                                                                                                                                                                                                                                                                                                                                                                                     |            |      |                                                                                                   |                                                                                                     |                                                                                                       |                                                                                                         |                                                                                                                                                                                                                                                                                                             |              | were more frequently reported in the probiotic than placebo group, in particular the occurrence of soft stools |
| <b>Dhaliwal2017(Dhaliwal et al., 2017)</b>     | 27 (SRP: 13; SRP+prob: 14)      | SRP: 31 ± 8.07<br>SRP+prob: 33.46 ± 6.63           | 20 males (74.07%) and 7 females (25.93%) | Bifi lac lozenges (Tablets India Private Limited, Chennai). It is a commercially available probiotic preparation combined with prebiotics to enhance its action. Each tablet contains Streptococcus faecalis T-110 JPC -30 million CFU, Clostridium butyricum TO-A IHS-2 million CFU, Bacillus mesentericus TO-A JPC-1 million CFU and Lactobacillus sporogenes IHS-50 million CFU. | Lozenges   | 3m   | (SRP) Day 0: 9.17 ± 0.75; 3m: 8.21 ± 1.08; (SRP+prob) Day 0: 9.45 ± 1.14; 3m: 8.16 ± 1.55.        | (SRP) Day 0: 4.97 ± 0.61; 3m: 4.15 ± 0.73; (SRP+prob) Day 0: 5.54 ± 1.08; 3m: 4.62 ± 1.32.          | (SRP) Day 0: 1.51 ± 0.40; 3m: 1.11 ± 0.15; (SRP+prob) Day 0: 1.59 ± 0.34; 3m: 1.20 ± 0.20.            | Not reported                                                                                            | (Aa) (SRP) Day 0: 10.57 ± 16.15; 3m: 11.07 ± 24.03; (SRP+prob) Day 0: 5.82 ± 10.60; 3m: 0.00 ± 0.00; (Pg) (SRP) Day 0: 28.29 ± 30.68; 3m: 14.36 ± 21.68; (SRP+prob) Day 0: 21.38 ± 22.51; 3m: 0.00 ± 0.00; (Pi) (SRP) Day 0: 0.71 ± 1.86; 3m: 2.57 ± 8.05; (SRP+prob) Day 0: 2.00 ± 5.54; 3m: 7.69 ± 27.74; | None         | Also report data relative to GI                                                                                |
| <b>EI-Bagoory2021(EI-Bagoory et al., 2021)</b> | 12 (SRP: 6; SRP+prob:6)         | SRP: 39.33 ± 3.20<br>SRP+prob: 39.33 ± 3.20        | SRP:1/5<br>SRP+prob: 2/4                 | <i>L. reuteri</i> DSM 17938 [1 × 10 <sup>8</sup> CFU]                                                                                                                                                                                                                                                                                                                               | Drops      | 4w   | (SRP) Day 0: 3.30 ± 0.48; 6m: 2.30 ± 0.67; (SRP+prob) Day 0: 3.10 ± 0.32; 6m: 1.30 ± 0.48.        | (SRP) Day 0: 5.30 ± 0.48; 6m: 4.30 ± 0.67; (SRP+prob) Day 0: 5.10 ± 0.32; 6m: 3.30 ± 0.48.          | Not reported                                                                                          | Not reported                                                                                            | (Pg) (SRP) Day 0: 31.01 ± 5.43; 6m: 36.10 ± 2.81; (SRP+prob) Day 0: 34.41 ± 1.13; 6m: 24.34 ± 3.30.                                                                                                                                                                                                         | None         | Loss of attachment                                                                                             |
| <b>Ghasemi2020(Ghasemi et al., 2020)</b>       | 36 (SRP+plac:18; SRP+prob:18)   | SRP+plac: 44.35<br>SRP+prob: 44.81                 | SRP+plac: 60%/40%;<br>SRP+prob: 55%/45%  | Prokid capsule (15×10 <sup>9</sup> probiotic units per capsule), which contained a combination of bacterial strains, i.e., Bifidobacterium lactis, Lactobacillus acidophilus, Bifidobacterium bifidum, Lactobacillus rhamnosus, which were purchased from Gostaresh Milad Pharmed Co                                                                                                | Mouth wash | 20d  | (SRP+plac) Day 0: 5.33±0.69; 3m: 4.69±0.69; (SRP+prob) Day 0: 5.31±0.58; 3m: 4.25±0.76.           | (SRP+plac) Day 0: 5.78±0.57; 3m: 4.97±0.68; (SRP+prob) Day 0: 5.65±0.57; 3m: 4.29±0.71.             | (SRP+plac) Day 0: 48.72±7.71; 3m: 20.11±7.54; (SRP+prob) Day 0: 50.76±7.87; 3m: 19.59±10.79.          | (SRP+plac) Day 0: 47.55±8.14; 3m: 23.45±9.17; (SRP+prob) Day 0: 48.95±7.73; 3m: 19.46±10.97.            | Not reported                                                                                                                                                                                                                                                                                                | Not reported | -                                                                                                              |
| <b>Grover(Grover)</b>                          | 30 (SRP: 15; SRP+prob: 15)      | SRP: 31 ± 8.07 (A)<br>SRP+prob: 33.46 ± 6.63 (B)   | population: 20/7                         | Bifilac lozenges (Streptococcus faecalis T-110 JPC -30 million CFU; Clostridium butyricum TO-A IHS-2 million CFU; Bacillus mesentericus TO-A JPC-1 million CFU; Lactobacillus sporogenes IHS-50 million CFU)                                                                                                                                                                        | Lozenges   | 21d  | (SRP) Day 0: 9.17 ± 0.75; 3m: 8.21 ± 1.08; (SRP+prob) Day 0: 9.45 ± 1.14; 3m: 8.16 ± 1.55.        | (SRP) Day 0: 4.97 ± 0.61; 3m: 4.15 ± 0.73; (SRP+prob) Day 0: 5.54 ± 1.08; 3m: 4.62 ± 1.32.          | (SRP) Day 0: 1.51 ± 0.40; 3m: 1.11 ± 0.15; (SRP+prob) Day 0: 1.59 ± 0.34; 3m: 1.20 ± 0.20.            | Not reported                                                                                            | (Aa) (SRP) Day 0: 10.57 ± 16.15; 3m: 11.07 ± 24.03; (SRP+prob) Day 0: 5.82 ± 10.60; 3m: 0 ± 0; (Pg) (SRP) Day 0: 28.29 ± 30.68; 3m: 14.36 ± 21.68; (SRP+prob) Day 0: 21.38 ± 22.51; 3m: 0 ± 0; (Pi) (SRP) Day 0: 0.71 ± 1.86; 3m: 2.57 ± 8.05; (SRP+prob) Day 0: 2.00 ± 5.54; 3m: 7.69 ± 27.74              | None         | Relative attachment loss<br>Also report data related to GI                                                     |
| <b>Ikram2019b(Ikram et al., 2019)</b>          | 67 (SRP+plac: 14; SRP+prob: 14) | SRP+plac: 40.14 ± 2.64;<br>SRP+prob: 41.78 ± 3.58; | SRP+plac: 8/6<br>SRP+prob: 9/5           | <i>L. reuteri</i> (doesn't mention dosage), but protocol has <i>L. reuteri</i> 1.2 billion CFU/g                                                                                                                                                                                                                                                                                    | Sachet     | 12wk | (SRP+plac) Day 0: 4.12 ± 0.74; 84d: 3.86 ± 0.59; (SRP+prob) Day 0: 4.08 ± 0.66; 84d: 3.24 ± 0.47. | (SRP+plac) Day 0: 4.25 ± 1.12; 84d: 3.95 ± 0.78; (SRP+prob) Day 0: 4.32 ± 0.91; 84d: 2.54 ± 0.52.   | (SRP+plac) Day 0: 84.58 ± 8.06; 84d: 33.67 ± 9.47; (SRP+prob) Day 0: 85.23 ± 8.23; 84d: 26.28 ± 4.12. | (SRP+plac) Day 0: 71.94 ± 23.13; 84d: 46.24 ± 11.40; (SRP+prob) Day 0: 70.47 ± 11.8; 84d: 13.89 ± 3.25. | Not reported                                                                                                                                                                                                                                                                                                | Not reported | -                                                                                                              |
| <b>Ince2015(Ince et al., 2015)</b>             | 30 (SRP+plac: 15; SRP+prob: 15) | SRP+plac: 42.20 ± 2.78<br>SRP+prob: 41 ± 3.17      | SRP+plac: 8/7<br>SRP+prob: 9/6           | <i>L. reuteri</i> DSM17938 and <i>L. reuteri</i> ATCC PTAS289 with 10 <sup>8</sup> CFU for each strain (Prodentis, Biogaia, Sweden).                                                                                                                                                                                                                                                | Lozenges   | 3wk  | Not reported                                                                                      | (SRP+plac) Day 0: 5.57 ± 0.39; 360d: 5.01 ± 0.40; (SRP+prob) Day 0: 5.85 ± 0.54; 360d: 4.15 ± 0.44. | (SRP+plac) Day 0: 2.23 ± 0.24; 360d: 1.43 ± 0.26; (SRP+prob) Day 0: 2.25 ± 0.25; 360d: 0.76 ± 0.24.   | (SRP+plac) Day 0: 88.65 ± 4.11; 360d: 19.00 ± 5.42; (SRP+prob) Day 0: 88.90 ± 7.66; 360d: 11.60 ± 4.35. | Not reported                                                                                                                                                                                                                                                                                                | None         | Also report data relative to GI, GCF volum, MMP-8, TIMP-1                                                      |

|                                                      |                                                         |                                                                                      |                                                           |                                                                                                                                                                                                 |                     |      |                                                                                                                                                                    |                                                                                                                                                                    |                                                                                                                                                                    |                                                                                                                                                                                |                                                                                                                                                                                                                                                              |              |                                                                                                                                                                                                                                                                                |
|------------------------------------------------------|---------------------------------------------------------|--------------------------------------------------------------------------------------|-----------------------------------------------------------|-------------------------------------------------------------------------------------------------------------------------------------------------------------------------------------------------|---------------------|------|--------------------------------------------------------------------------------------------------------------------------------------------------------------------|--------------------------------------------------------------------------------------------------------------------------------------------------------------------|--------------------------------------------------------------------------------------------------------------------------------------------------------------------|--------------------------------------------------------------------------------------------------------------------------------------------------------------------------------|--------------------------------------------------------------------------------------------------------------------------------------------------------------------------------------------------------------------------------------------------------------|--------------|--------------------------------------------------------------------------------------------------------------------------------------------------------------------------------------------------------------------------------------------------------------------------------|
| <b>Invernici2018(Invernici et al., 2018)</b>         | 41<br>(SRP+plac: 21;<br>SRP+prob: 20)                   | Not reported                                                                         | Not reported                                              | Bifidobacterium animalis subsp. lactis (B. lactis) HN019 (HOWARU® Bifido LYO 40 DCUS, DuPont™ Danisco® Sweeteners Oy, Kantvik, Finland) (10 <sup>9</sup> colony-forming units (CFUs))           | Lozenges            | 30d  | (SRP+plac) Day 0: 3.42 ± 0.54;<br>90d: 3.24 ± 0.51;<br>(SRP+prob) Day 0: 3.26 ± 0.39;<br>90d: 2.77 ± 0.38.                                                         | (SRP+plac) Day 0: 3.10 ± 0.43;<br>90d: 2.85 ± 0.34;<br>(SRP+prob) Day 0: 3.01 ± 0.27;<br>90d: 2.49 ± 0.27.                                                         | (SRP+plac) Day 0: 26.71 ± 16.60;<br>90d: 27.14 ± 18.64;<br>(SRP+prob) Day 0: 23.85 ± 15.33;<br>90d: 21.65 ± 13.13.                                                 | (SRP+plac) Day 0: 35.00 ± 25.84;<br>90d: 30.71 ± 27.86;<br>(SRP+prob) Day 0: 30.80 ± 22.07;<br>90d: 18.80 ± 16.14.                                                             | Not reported                                                                                                                                                                                                                                                 | None         | Also report mean difference and data relative to moderate and deep pockets separately                                                                                                                                                                                          |
| <b>Invernici2020(Invernici et al., 2020)</b>         | 30<br>(SRP+plac: 15;<br>SRP+prob: 15)                   | SRP+plac:<br>47.67 ± 9.49<br>SRP+prob:<br>47.60 ± 9.97                               | SRP+plac:<br>8/7<br>SRP+prob:<br>5/10                     | 10 <sup>9</sup> colony-forming units (CFUs) of B. lactis HN019 (HOWARU® Bifido LYO 40 DCU-S, DuPont™ Danisco® Sweeteners Oy, Kantvik, Finland)                                                  | Lozenges            | 30d  | Not reported                                                                                                                                                       | Not reported                                                                                                                                                       | (SRP+plac) Day 0: 22.50 ± 8.54;<br>90d: 22.66 ± 9.99;<br>(SRP+prob) Day 0: 18.71 ± 12.14;<br>90d: 18.27 ± 17.11.                                                   | (SRP+plac) Day 0: 14.07 ± 7.99;<br>90d: 12.10 ± 8.19;<br>(SRP+prob) Day 0: 9.17 ± 7.71;<br>90d: 5.92 ± 6.12.                                                                   | Not reported                                                                                                                                                                                                                                                 | None         | Also report data relative to immunocompetence of gingival tissues [expression of beta-defensin (BD)-3, toll-like receptor 4 (TLR4), cluster of differentiation (CD)-57 and CD-4], and on immunological properties of saliva (IgA levels)                                       |
| <b>Jebin2021(Jebin et al., 2021)</b>                 | 27<br>(SRP:13;<br>SRP+prob:14)                          | SRP:<br>37.8 ± 7.90<br>SRP+prob:<br>37.5 ± 7.12                                      | SRP: 10/3<br>SRP+prob:11/3                                | L. reuteri UBLRu-87, 0.5 billion CFU, Unique Biotech Ltd, Hyderabad, India                                                                                                                      | Chewable tablet     | 1m   | (SRP) Day 0: 4.17 ± 0.20;<br>3m: 3.50 ± 0.21;<br>(SRP+prob) Day 0: 3.99 ± 0.56;<br>3m: 2.97 ± 0.35.                                                                | (SRP) Day 0: 5.20 ± 0.40;<br>3m: 4.35 ± 0.38;<br>(SRP+prob) Day 0: 5.27 ± 0.49;<br>3m: 3.6 ± 0.56.                                                                 | (SRP) Day 0: 1.80 ± 0.32;<br>3m: 1.28 ± 0.23;<br>(SRP+prob) Day 0: 1.69 ± 0.36;<br>3m: 0.95 ± 0.19.                                                                | Not reported                                                                                                                                                                   | (SRP) Day 0: 6.43±0.64;<br>3m: 4.54±0.49;<br>(SRP+prob) Day 0: 6.60±0.63;<br>3m: 3.94±0.33.                                                                                                                                                                  | None         | Also report data related to GI PI is reported according to mean of Silness & Loe index 1964                                                                                                                                                                                    |
| <b>Kanagaraj2019(Kanagaraj et al., 2019)</b>         | 60<br>(SRP+plac: 30;<br>SRP+prob: 30)                   | 25-50                                                                                | Not reported                                              | BIFILAC-lozenges) contains Lactobacillus sporogenes 100 million, Streptococcus faecalis T-110 JPC 60 million, Clostridium butyrium TO-A 4 million and Bacillus mesentericus TO-A JPC 2 million. | Lozenges            | 3w   | (SRP+plac) Day 0: 3.09 ± 0.21;<br>6w: 1.27 ± 0.38;<br>(SRP+prob) Day 0: 3.05 ± 0.13;<br>6w: 0.50 ± 0.47.                                                           | (SRP+plac) Day 0: 5.13 ± 0.10;<br>6w: 2.50 ± 0.54;<br>(SRP+prob) Day 0: 5.19 ± 0.14;<br>6w: 1.69 ± 0.57.                                                           | (SRP+plac) Day 0: 2.12 ± 0.51;<br>6w: 1.92 ± 0.43;<br>(SRP+prob) Day 0: 2.15 ± 0.48;<br>6w: 1.04 ± 0.51.                                                           | (SRP+plac) Day 0: 2.30 ± 0.47;<br>6w: 1.96 ± 0.43;<br>(SRP+prob) Day 0: 2.24 ± 0.42;<br>6w: 1.13 ± 0.49.                                                                       | In evaluating the presence of Porphyromonas gingivalis, more positive bands of P gingivalis was seen in both Group I and Group II at Day 0 and there was much reduction after 3 weeks in Group II after post therapy compared to Group I as shown in Fig. 3. | None         | Sulcus bleeding index<br>Also report data related to MMP 8 Levels in GCF<br>Data from PI are presented in % but the method is not explained                                                                                                                                    |
| <b>Kumar2021(Kumar et al., 2021)</b>                 | 48<br>(SRP+plac: 15;<br>SRP+prob: 15;<br>SRP+pprob: 15) | SRP+plac:<br>42.87 ± 3.42<br>SRP+prob:<br>41.79 ± 2.37<br>SRP+pprob:<br>39.74 ± 2.97 | SRP+plac:<br>7/8<br>SRP+prob:<br>6/9<br>SRP+pprob:<br>8/7 | 5.9 billion colony-forming units (CFU) of L. reuteri per gram and maltodextrin as a carrier (batch No. LR 12, Meteoric Lifesciences, Ahmedabad, India)                                          | Free-flowing powder | 4w   | (SRP+plac) Day 0: 5.92 ± 0.65;<br>24w: 4.79 ± 0.90;<br>(SRP+prob) Day 0: 6.27 ± 0.75;<br>24w: 4.82 ± 0.60;<br>(SRP+pprob) Day 0: 6.44 ± 0.79;<br>24w: 4.88 ± 0.58. | (SRP+plac) Day 0: 6.72 ± 0.63;<br>24w: 5.08 ± 0.50;<br>(SRP+prob) Day 0: 6.78 ± 0.72;<br>24w: 4.92 ± 0.58;<br>(SRP+pprob) Day 0: 6.63 ± 0.75;<br>24w: 4.91 ± 0.73. | (SRP+plac) Day 0: 2.08 ± 0.18;<br>24w: 0.70 ± 0.40;<br>(SRP+prob) Day 0: 2.10 ± 0.23;<br>24w: 0.73 ± 0.24;<br>(SRP+pprob) Day 0: 2.20 ± 0.43;<br>24w: 0.46 ± 0.19. | (SRP+plac) Day 0: 81.67 ± 19.97;<br>24w: 43.33 ± 22.09;<br>(SRP+prob) Day 0: 93.33 ± 11.44;<br>24w: 35.00 ± 22.76;<br>(SRP+pprob) Day 0: 92.86 ± 15.28;<br>24w: 31.21 ± 15.39. | Not reported                                                                                                                                                                                                                                                 | None         | Also reported Intra-group comparisons of clinical outcomes at various time intervals for test teeth and Biochemical outcome measures with inter-group comparisons at various time intervals for the test teeth<br>PI is reported according to mean of Silness & Loe index 1964 |
| <b>Laleman2015(Laleman et al., 2015)</b>             | 48<br>(SRP+plac: 24;<br>SRP+prob: 24)                   | SRP+plac:<br>46.0 ± 5.0<br>SRP+prob:<br>47.0 ± 5.0                                   | SRP+plac:<br>14/10<br>SRP+prob:<br>12/12                  | S. oralis KJ3, S. uberis KJ2 and S. rattus JH145 (Probiora3.,Oragenics, Alachua, FL, USA) were added (at least 108 CFU of each strain/tablet)                                                   | Tablet              | 12wk | (SRP+plac) Day 0: 5.36 ± 0.45;<br>24w: 4.60 ± 0.48;<br>(SRP+prob) Day 0: 5.22 ± 0.41;<br>24w: 4.51 ± 0.41.                                                         | (SRP+plac) Day 0: 4.59 ± 0.52;<br>24w: 2.98 ± 0.47;<br>(SRP+prob) Day 0: 4.50 ± 0.51;<br>24w: 2.99 ± 0.47.                                                         | Not reported                                                                                                                                                       | (SRP+plac) Day 0: 85.55 ± 7.29<br>24w: 30.11 ± 10.36;<br>(SRP+prob) Day 0: 87.44 ± 6.03;<br>24w: 26.98 ± 9.34.                                                                 | Not reported                                                                                                                                                                                                                                                 | None         | Also report data relative to moderate and deep pockets separately                                                                                                                                                                                                              |
| <b>Meenakshi2020(Meenakshi &amp; Varghese, 2018)</b> | 20<br>(SRP:10;<br>SRP+prob:10)                          | Not reported                                                                         | Not reported                                              | Yakult containing <i>Lactobacillus casei</i> strain Shirota                                                                                                                                     | Mouth wash          | 1m   | (SRP) Day 0: 4.89±0.55;<br>1m: 4.54±0.53;<br>(SRP+prob) Day 0: 4.95±0.40;<br>1m: 4.01±0.53.                                                                        | (SRP) Day 0: 4.46±0.75;<br>1m: 4.14±0.66;<br>(SRP+prob) Day 0: 4.57±0.51;<br>1m: 3.43±0.39.                                                                        | (SRP) Day 0: 1.76±0.41;<br>1m: 1.40±0.35;<br>(SRP+prob) Day 0: 1.93±0.40;<br>1m: 0.80±0.35.                                                                        | Not reported                                                                                                                                                                   | (SRP) Day 0: 163.9±37.6;<br>1m: 122.5±28.6;<br>(SRP+prob) Day 0: 169.4±34.7;<br>1m: 98.9±16.2.                                                                                                                                                               | Not reported | Also report data relative to gingival index                                                                                                                                                                                                                                    |
| <b>Minic2020(Minic et al., 2022)</b>                 | 80<br>(SRP: 40;<br>SRP+prob: 40)                        | 35-55                                                                                | Not reported                                              | 6.5 billion live Lactobacillus acidophilus, concentration of 107 CFU, at least 107 CFU Bifidobacterium infantis and at least 106 CFU Enterococcus faecium colony-forming units per capsule      | Gel                 | 5d   | Not reported                                                                                                                                                       | (SRP) Day 0: 5.22 ± 0.56;<br>30d: 4.72 ± 0.36;<br>(SRP+prob) Day 0: 5.30 ± 0.46;<br>30d: 4.08 ± 0.22.                                                              | (SRP) Day 0: 1.92 ± 0.53;<br>30d: 0.61 ± 0.03;<br>(SRP+prob) Day 0: 2.00 ± 0.56;<br>30d: 0.10 ± 0.04.                                                              | (SRP) Day 0: 1.87 ± 0.38;<br>30d: 0.82 ± 0.13;<br>(SRP+prob) Day 0: 1.80 ± 0.35;<br>30d: 0.18 ± 0.06.                                                                          | Not reported                                                                                                                                                                                                                                                 | None         | PI were recorded as follows: 0 = no plaque present; 1 = plaque covering not more than 1/3 of the tooth; 2 = plaque covering more than 1/3, but not more than 2/3 of exposed tooth surface; and 3 = plaque covering                                                             |



|                                            |                                       |                                                 |                                  |                                                                                                                |          |     |                                                                                                                |                                                                                                             |                                                                                                               |                                                                                                                  |                                                                                                                                                                                                  |                                                                                                                                                                                                                                                                                                                                                                          |                                                                                                                                                                                                                     |
|--------------------------------------------|---------------------------------------|-------------------------------------------------|----------------------------------|----------------------------------------------------------------------------------------------------------------|----------|-----|----------------------------------------------------------------------------------------------------------------|-------------------------------------------------------------------------------------------------------------|---------------------------------------------------------------------------------------------------------------|------------------------------------------------------------------------------------------------------------------|--------------------------------------------------------------------------------------------------------------------------------------------------------------------------------------------------|--------------------------------------------------------------------------------------------------------------------------------------------------------------------------------------------------------------------------------------------------------------------------------------------------------------------------------------------------------------------------|---------------------------------------------------------------------------------------------------------------------------------------------------------------------------------------------------------------------|
|                                            |                                       |                                                 |                                  |                                                                                                                |          |     |                                                                                                                |                                                                                                             |                                                                                                               |                                                                                                                  |                                                                                                                                                                                                  |                                                                                                                                                                                                                                                                                                                                                                          | more than 2/3 of exposed tooth surface. BOP was evaluated using a scoring scheme, where 0 = no bleeding within 10 seconds after probing; 1 = bleeding within 10 seconds after probing; and 2 = bleeding on probing. |
| <b>Morales2016(Morales et al., 2016)</b>   | 28<br>(SRP+plac: 14;<br>SRP+prob:14)  | SRP+plac: 46.9 ± 10.3<br>SRP+prob: 52.7 ± 7.3   | SRP+plac: 7/7<br>SRP+prob: 7/7   | <i>L. rhamanosus</i> SP1 ( $2 \times 10^7$ CFU/day) (Macrofood SA, Santiago, Chile)                            | Sachet   | 3m  | (SRP+plac) Day 0: 4.9 ± 1.3;<br>12m: 4.8 ± 1.3;<br>(SRP+prob) Day 0: 4.2 ± 0.9;<br>12m: 4.1 ± 1.0.             | (SRP+plac) Day 0: 2.5 ± 0.3;<br>12m: 2.0 ± 0.2;<br>(SRP+prob) Day 0: 2.7 ± 0.6;<br>12m: 2.1 ± 0.5.          | (SRP+plac) Day 0: 52.1 ± 20.7;<br>12m: 35.5 ± 11.4;<br>(SRP+prob) Day 0: 63.1 ± 18.59.<br>12m: 33.1 ± 21.3.   | (SRP+plac) Day 0: 33.8 ± 16.1;<br>12m: 25.4 ± 10.3;<br>(SRP+prob) Day 0: 41.1 ± 16.3;<br>12m: 29.3 ± 12.7.       | Not reported                                                                                                                                                                                     | None                                                                                                                                                                                                                                                                                                                                                                     | -                                                                                                                                                                                                                   |
| <b>Oliveira2021(Oliveira et al., 2021)</b> | 48<br>(SRP+plac: 23;<br>SRP+prob: 19) | SRP+plac: 53.0 (12.0)<br>SRP+prob: 49.0 (10.0)  | SRP+plac: 9/14<br>SRP+prob: 10/9 | The probiotic selected * contained 5 strains of <i>Lactobacillus</i> spp. and 3 of <i>Bifidobacterium</i> spp. | Capsule  | 30d | (SRP+plac) Day 0: 3.18 (1.06);<br>2m: 2.89 (0.96);<br>(SRP+prob) Day 0: 3.31 (1.12);<br>2m: 2.74 (1.14).       | (SRP+plac) Day 0: 2.82 (0.62);<br>2m: 2.24 (0.28);<br>(SRP+prob) Day 0: 3.00 (0.49);<br>2m: 2.36 (0.43).    | (SRP+plac) Day 0: 62.10 (20);<br>2m: 44.90 (19.10);<br>(SRP+prob) Day 0: 61.30 (22.10);<br>2m: 47.90 (22.40). | (SRP+plac) Day 0: 45.10 (22.05);<br>2m: 24.70 (19.90);<br>(SRP+prob) Day 0: 53.30 (32.60);<br>2m: 32.20 (23.10). | Change in mean counts, 41 graphics<br>Not reported on other way                                                                                                                                  | The 42 individuals who finished the study reported full adherence to the prescribed products, but 3 did not fill the side effects form correctly. Most patients reported feeling well during treatments; however, gastrointestinal symptoms were more frequently reported in the probiotic than placebo group, in particular the occurrence of soft stools. Median (IQR) | -                                                                                                                                                                                                                   |
| <b>Özener2023(Ozener et al., 2023)</b>     | 30<br>(SRP+plac: 15;<br>SRP+prob: 15) | SRP+plac: 42.27 ± 8.8;<br>SRP+prob: 41.40 ± 6.8 | SRP+plac: 7/8<br>SRP+prob: 8/7   | <i>B. lactis</i> DN-173010, $\geq 10^8$ CFU                                                                    | Yogurt   | 28d | (SRP+plac) Day 0: 2.67 ± 0.46;<br>3m: 2.16 ± 0.43;<br>(SRP+prob) Day 0: 2.93 ± 0.37;<br>3m: 2.26 ± 0.45.       | (SRP+plac) Day 0: 2.59 ± 0.43;<br>3m: 2.06 ± 0.35c;<br>(SRP+prob) Day 0: 2.76 ± 0.38;<br>3m: 2.05 ± 0.36.   | (SRP+plac) Day 0: 1.79 ± 0.36;<br>3m: 0.35 ± 0.22;<br>(SRP+prob) Day 0: 1.81 ± 0.23;<br>3m: 0.18 ± 0.08.      | (SRP+plac) Day 0: 49.16 ± 15.09;<br>3m: 22.34 ± 5.23;<br>(SRP+prob) Day 0: 52.70 ± 21.98;<br>3m: 10.58 ± 3.16.   | (SRP+plac) Day 0: 75.64 ± 42.72;<br>3m: 24.90 ± 28.31;<br>(SRP+prob) Day 0: 93.95 ± 76.18;<br>3m: 31.95 ± 39.62.                                                                                 | None                                                                                                                                                                                                                                                                                                                                                                     | PI is reported according to mean of Silness & Loe index 1964; CFU was calculated for total viable count                                                                                                             |
| <b>Paul2019(Paul et al., 2019)</b>         | 30<br>(SRP+plac: 13;<br>SRP+prob: 14) | 38.1                                            | 13/17                            | <i>Lactobacillus brevis</i> (dosage not reported)                                                              | Lozenges | 3w  | (SRP+plac) Day 0: 3.584 ± 0.73;<br>12w: 2.776 ± 0.71;<br>(SRP+prob) Day 0: 3.580 ± 1.00;<br>12w: 3.133 ± 1.15. | (SRP+plac) Day 0: 3.420 ± 0.77;<br>12w: 2.617 ± 0.97;<br>(SRP+prob) Day 0: 3.280 ± 0.83; 12w: 2.573 ± 0.60. | (SRP+plac) Day 0: 1.138 ± 0.78;<br>12w: 0.604 ± 0.38;<br>(SRP+prob) Day 0: 1.274 ± 0.63; 12w: 0.636 ± 0.32.   | (SRP+plac) Day 0: 0.902 ± 0.17;<br>12w: 0.540 ± 0.24;<br>(SRP+prob) Day 0: 0.871 ± 0.30; 12w: 0.714 ± 0.22.      | (Aa)<br>(SRP+plac) Day 0: 10500 ± 14740;<br>12w: 0 ± 0;<br>(SRP+prob) Day 0: 19000 ± 41160;<br>12w: 0 ± 0;<br>(Pg)<br>(SRP+plac) Day 0: 12400 ± 10400;<br>12w: 0 ± 0;<br>(SRP+prob) Day 0: 18400 | None                                                                                                                                                                                                                                                                                                                                                                     | PI is reported according to mean of Silness & Loe index 1964<br>BOP is reported according to mean of Ainamo & Bay index 1975                                                                                        |

|                                             |                                       |                                                  |                                         |                                                                                                                                                                                                                                                              |               |     |                                                                                                                      |                                                                                                                      |                                                                                                                              |                                                                                                                                 |                                                                                                                                                                                                                                                                                                                                                                                                                                                                                                                                                                                            |                                                                                 |                                                                                                                                                          |
|---------------------------------------------|---------------------------------------|--------------------------------------------------|-----------------------------------------|--------------------------------------------------------------------------------------------------------------------------------------------------------------------------------------------------------------------------------------------------------------|---------------|-----|----------------------------------------------------------------------------------------------------------------------|----------------------------------------------------------------------------------------------------------------------|------------------------------------------------------------------------------------------------------------------------------|---------------------------------------------------------------------------------------------------------------------------------|--------------------------------------------------------------------------------------------------------------------------------------------------------------------------------------------------------------------------------------------------------------------------------------------------------------------------------------------------------------------------------------------------------------------------------------------------------------------------------------------------------------------------------------------------------------------------------------------|---------------------------------------------------------------------------------|----------------------------------------------------------------------------------------------------------------------------------------------------------|
|                                             |                                       |                                                  |                                         |                                                                                                                                                                                                                                                              |               |     |                                                                                                                      |                                                                                                                      |                                                                                                                              |                                                                                                                                 | ± 23000;<br>12w: 538 ± 1050;<br>(Pi)<br>(SRP+plac) Day 0: 4181 ± 8931;<br>12w: 0 ± 0;<br>(SRP+prob) Day 0: 1846 ± 3105;<br>12w: 0 ± 0;                                                                                                                                                                                                                                                                                                                                                                                                                                                     |                                                                                 |                                                                                                                                                          |
| <b>Pelekos2020 (Pelekos et al., 2020)</b>   | 59<br>(SRP+plac: 20;<br>SRP+prob: 20) | SRP+plac:<br>52.76<br>SRP+prob:<br>51.14         | SRP+plac:<br>10/10<br>SRP+prob:<br>4/16 | L. reuteri DSM17938 and L. reuteri ATCC PTA5289 with 10 <sup>8</sup> CFU for each strain (Prodentis, Biogaia, Sweden).                                                                                                                                       | Lozenges      | 28d | (SRP+plac) Day 0: 8.02 ± 2.32;<br>180d: 7.50 ± 2.58;<br>(SRP+prob) Day 0: 7.61 ± 1.99;<br>180d: 7.07 ± 2.20.         | (SRP+plac) Day 0: 6.38 ± 1.68;<br>180d: 4.97 ± 1.91;<br>(SRP+prob) Day 0: 5.95 ± 1.19;<br>180d: 4.55 ± 1.37.         | Not reported                                                                                                                 | (SRP+plac) Day 0: 221(93.2%);<br>180d: 145 (61.2%);<br>(SRP+prob) Day 0: 184 (87.6%);<br>180d: 110 (52.4%).                     | Not reported                                                                                                                                                                                                                                                                                                                                                                                                                                                                                                                                                                               | Not reported                                                                    | -                                                                                                                                                        |
| <b>Penala2016 (Penala et al., 2016)</b>     | 29<br>(SRP+plac: 14;<br>SRP+prob: 15) | SRP+plac: 35.5 ± 9.17<br>SRP+prob: 37.2 ± 9.79   | Not reported                            | Lactobacillus salivarius (2 × 10 <sup>9</sup> CFU) and Lactobacillus reuteri (2 × 10 <sup>9</sup> CFU) per capsule                                                                                                                                           | Mouth wash    | 14d | (SRP+plac) Day 0: 2.88 ± 0.40;<br>3m: gráfico;<br>(SRP+prob) Day 0: 2.98 ± 0.78;<br>3m: gráfico.                     | (SRP+plac) Day 0: 3.19 ± 0.44;<br>3m: gráfico;<br>(SRP+prob) Day 0: 3.12 ± 0.71;<br>3m: gráfico.                     | (SRP+plac) Day 0: 2.16 ± 0.35;<br>3m: 0.72 ± 0.39;<br>(SRP+prob) Day 0: 1.81 ± 0.47;<br>3m: 0.35 ± 0.18.                     | (SRP+plac) Day 0: 1.79 ± 0.11;<br>3m: 0-71 ± 0.43.<br>(SRP+prob) Day 0: 1.65 ± 0.38;<br>3m: 0.31 ± 0.14.                        | Not reported                                                                                                                                                                                                                                                                                                                                                                                                                                                                                                                                                                               | None                                                                            | Also report data relative to moderate and deep pockets; also data relative to halitosis; Data from PI are presented in % but the method is not explained |
| <b>Pudgar2021 (Pudgar et al., 2021)</b>     | 40<br>(SRP+plac: 20;<br>SRP+prob: 20) | SRP+plac: 46.7 (11.0)<br>SRP+prob: 45.9 (8.0)    | SRP+plac: 11/9<br>SRP+prob: 7/13        | 6.0 × 10 <sup>9</sup> CFU/ml of L. brevis (CECT7480) [8] and 6.0 × 10 <sup>9</sup> CFU/ml of L. plantarum (CECT7481) [8], while the probiotic lozenges contained 1.2 × 10 <sup>9</sup> CFU/ml of each bacterium (ProLacSan, CMS Dental, Copenhagen, Denmark) | Lozenges      | 3m  | (SRP+plac) Day 0: 4.5 (4.0; 5.9);<br>3m: 3.7 (3.3; 4.9);<br>(SRP+prob) Day 0: 4.3 (3.8; 4.9);<br>3m: 3.6 (3.1; 4.2). | (SRP+plac) Day 0: 4.0 (3.6; 4.3);<br>3m: 3.1 (2.8; 3.3);<br>(SRP+prob) Day 0: 3.9 (3.7; 4.2);<br>3m: 3.0 (2.9; 3.2). | (SRP+plac) Day 0: 23.5 (14.0; 36.5)<br>3m: 12.5 (5.5; 23.5);<br>(SRP+prob) Day 0: 24.5 (17.5; 38.0);<br>3m: 9.0 (6.0; 13.5). | (SRP+plac) Day 0: 63.0 (44.0; 74.5)<br>3m: 24.5 (15.5; 30.0);<br>(SRP+prob) Day 0: 63.0 (45.0; 77.5);<br>3m: 27.0 (18.5; 31.0). | Not reported                                                                                                                                                                                                                                                                                                                                                                                                                                                                                                                                                                               | None                                                                            | Also report data relative to gingival recession<br>Data relative to PI is reported by median (Q1; Q3)                                                    |
| <b>Ranjith2021 (Ranjith et al., 2022)</b>   | 60<br>(SRP+plac: 27;<br>SRP+prob: 28) | SRP+plac: 37.95 ± 6.94<br>SRP+prob: 39.48 ± 7.65 | SRP+plac: 16/14<br>SRP+prob: 17/13      | Darolac, Aristo pharmaceuticals, India containing 1 g powder of 1.25 billion freeze-dried combination of a mixture of L. acidophilus, L. rhamnosus, B. longum and S. boulardii.                                                                              | Sachet (2x/d) | 1m  | (SRP+plac) Day 0: 2.9 ± 0.16;<br>90d: 2.72 ± 0.10;<br>(SRP+prob) Day 0: 3.48 ± 0.2;<br>90d: 2.25 ± 0.11.             | (SRP+plac) Day 0: 3.0 ± 0.16;<br>90d: 2.74 ± 0.15;<br>(SRP+prob) Day 0: 3.4 ± 0.28;<br>90d: 2.65 ± 0.11.             | (SRP+plac) Day 0: 1.57 ± 0.87;<br>90d: 1.06 ± 0.06;<br>(SRP+prob) Day 0: 1.7 ± 0.87;<br>90d: 1.09 ± 0.07.<br>(Silness & Loe) | Not reported                                                                                                                    | Not reported                                                                                                                                                                                                                                                                                                                                                                                                                                                                                                                                                                               | No adverse events were reported and compliance was satisfactory in both groups. | -                                                                                                                                                        |
| <b>Tekce2015 (Tekce et al., 2015)</b>       | 40<br>(SRP+plac: 20;<br>SRP+prob: 20) | SRP+plac: 41.40 ± 8.86<br>SRP+prob: 43 ± 5.01    | SRP+plac: 10/10<br>SRP+prob: 8/12       | L. reuteri (1x10 <sup>8</sup> CFU) for DSM17938 and ATCC PTA5289 (Prodentis; BioGaia, Lund, Sweden)                                                                                                                                                          | Lozenges      | 3w  | Not reported                                                                                                         | (SRP+plac) Day 0: 5.36 ± 0.72;<br>360d: 4.80 ± 0.70;<br>(SRP+prob) Day 0: 5.23 ± 0.68;<br>360d: 3.49 ± 0.87.         | (SRP+plac) Day 0: 2.30 ± 0.41;<br>360d: 1.39 ± 0.28;<br>(SRP+prob) Day 0: 2.29 ± 0.28;<br>360d: 0.73 ± 0.24.                 | (SRP+plac) Day 0: 88.65 ± 4.11;<br>360d: 19.05 ± 4.84;<br>(SRP+prob) Day 0: 88.90 ± 7.66;<br>360d: 11.05 ± 3.99.                | (SRP+plac) Day 0: 41.5 (14-81);<br>360d: 40.5 (12-78);<br>(SRP+prob) Day 0: 35.5 (26-43);<br>360d: 35 (25-42).                                                                                                                                                                                                                                                                                                                                                                                                                                                                             | None                                                                            | Also report data relative to gingival index; PI is reported according to mean of Silness & Loe index 1964; CFU presented with median, (min-max)          |
| <b>Teughels2013 (Teughels et al., 2013)</b> | 30<br>(SRP+plac: 15;<br>SRP+prob: 15) | SRP+plac: 45.7 ± 6.2<br>SRP+prob: 46.6 ± 4.5     | SRP+plac: 8/7<br>SRP+prob: 7/8          | L. reuteri (1x10 <sup>8</sup> CFU) for DSM17938 and ATCC PTA5289 (Prodentis; BioGaia, Lund, Sweden)                                                                                                                                                          | Lozenges      | 12w | (SRP+plac) Day 0: 4.97 ± 0.61;<br>12w: 4.21 ± 0.67;<br>(SRP+prob) Day 0: 4.97 ± 1.01;<br>12w: 3.97 ± 0.97.           | (SRP+plac) Day 0: 4.32 ± 0.50;<br>12w: 2.93 ± 0.40;<br>(SRP+prob) Day 0: 4.15 ± 0.71;<br>12w: 2.73 ± 0.57.           | (SRP+plac) Day 0: 99.66 ± 0.99;<br>12w: 24.88 ± 33.26;<br>(SRP+prob) Day 0: 95 ± 10.27;<br>12w: 16.34 ± 19.19.               | (SRP+plac) Day 0: 67.53% ± 11.37;<br>12w: 16.58% ± 10.54;<br>(SRP+prob) Day 0: 70.70% ± 14.53;<br>12w: 15.51% ± 11.92.          | (Aa) (SRP+plac) Day 0: 3.57 ± 1.97;<br>12w: 1.86 ± 2.12;<br>(SRP+prob) Day 0: 3.84 ± 2.70;<br>12w: 1.98 ± 2.38;<br>(Fn) (SRP+plac) Day 0: 7.40 ± 1.16;<br>12w: 5.87 ± 1.08;<br>(SRP+prob) Day 0: 7.70 ± 1.11;<br>12w: 5.45 ± 2.05;<br>(Pg) (SRP+plac) Day 0: 6.37 ± 1.7;<br>12w: 5.43 ± 1.73;<br>(SRP+prob) Day 0: 6.67 ± 1.5;<br>12w: 4.87 ± 1.21;<br>(Pi) (SRP+plac) Day 0: 6.17 ± 2.73;<br>12w: 4.81 ± 2.44;<br>(SRP+prob) Day 0: 6.345 ± 2.14;<br>12w: 4.22 ± 2.07;<br>(TI) (SRP+plac) Day 0: 0.656 ± 0.89;<br>12w: 5.24 ± 1.17;<br>(SRP+prob) Day 0: 5.95 ± 1.82<br>12w: 8.49 ± 0.82; | None                                                                            | Also report data relative to moderate and deep pockets separately and individually for specific bacteria (Aa, Fn, Pg, Pi, Tj)                            |

|                                              |                                       |                                                                      |                                       |                                                                                                                              |              |              |                                                                                                            |                                                                                                                                                                                                                                                                                                                             |                                                                                                                |                                                                                                                    |                                                                                                                            |              |                                                                                                                    |
|----------------------------------------------|---------------------------------------|----------------------------------------------------------------------|---------------------------------------|------------------------------------------------------------------------------------------------------------------------------|--------------|--------------|------------------------------------------------------------------------------------------------------------|-----------------------------------------------------------------------------------------------------------------------------------------------------------------------------------------------------------------------------------------------------------------------------------------------------------------------------|----------------------------------------------------------------------------------------------------------------|--------------------------------------------------------------------------------------------------------------------|----------------------------------------------------------------------------------------------------------------------------|--------------|--------------------------------------------------------------------------------------------------------------------|
|                                              |                                       |                                                                      |                                       |                                                                                                                              |              |              |                                                                                                            |                                                                                                                                                                                                                                                                                                                             |                                                                                                                |                                                                                                                    | (Total load) (SRP+plac)<br>Day 0: 10.11 ± 0.86;<br>12w: 8.99 ± 0.99;<br>(SRP+prob) Day 0: 9.9 ± 0.52;<br>12w: 8.49 ± 0.82; |              |                                                                                                                    |
| <b>Theodoro2019</b> (Theodoro et al., 2019)  | 34<br>(SRP+plac: 14;<br>SRP+prob: 14) | SRP+plac:<br>45.07 ± 6.31<br>SRP+prob:<br>47.25 ± 7.10               | SRP+plac:<br>10/4<br>SRP+prob:<br>5/9 | <i>L. reuteri</i> DSM 17938, with 1×10 <sup>8</sup> cfu (BioGaia™, 450 mg, Laboratórios Ferring Ltda, São Paulo, SP, Brazil) | Lozenges     | 21d          | (SRP+plac) Day 0: 4.23 ± 0.56;<br>90d: 4.17 ± 0.42;<br>(SRP+prob) Day 0: 4.39 ± 0.86;<br>90d: 3.96 ± 0.89. | (SRP+plac) Day 0: 3.81 ± 0.44;<br>90d: 3.66 ± 0.36;<br>(SRP+prob) Day 0: 3.23 ± 0.44;<br>90d: 2.98 ± 0.54.                                                                                                                                                                                                                  | Not reported                                                                                                   | (SRP+plac) Day 0: 74.10 ± 22.08;<br>90d: 65.13 ± 20.65;<br>(SRP+prob) Day 0: 45.74 ± 20.65;<br>90d: 23.51 ± 14.15. | Not reported                                                                                                               | None         | Also report data relative to moderate and deep pockets separately and % deep pockets + BOP; and gingival recession |
| <b>Tsubura2009</b> (Tsubura et al., 2009)    | 54<br>(SRP+cont:27;<br>SRP+prob: 27)  | 53.4<br>(44-62)                                                      | 21/33                                 | <i>Bacillus subtilis</i>                                                                                                     | Mouth wash   | 30d          | Not reported                                                                                               | (SRP+cont) Day 0:<br>4.7±0.72;<br>30d: 3.5±0.51;<br>(SRP+prob) Day 0:<br>4.8±0.75;<br>30d: 4.2±0.60.                                                                                                                                                                                                                        | Not reported                                                                                                   | (SRP+cont) Day 0:<br>1.6±0.50;<br>30d: 0.8±0.62;<br>(SRP+prob) Day 0:<br>1.6±0.51;<br>30d: 0.5±0.51.               | Not reported                                                                                                               | Not reported | Also report data relative to GI and BANA score                                                                     |
| <b>Vicario2013</b><br>(Vicario et al., 2013) | 19<br>(SRP+plac: 9;<br>SRP+prob: 10)  | SRP+plac:<br>53.8<br>(44.3–63.1)<br>SRP+prob:<br>58.0<br>(51.4–64.7) | SRP+plac:<br>4/5<br>SRP+prob:<br>8/2  | <i>Lactobacillus reuteri</i> (ATCC 55730 and ATCCPTA 5289) (2X10 <sup>8</sup> living cells of <i>L.reuteri</i> Prodentis)    | Not reported | Not reported | Not reported                                                                                               | % sites with pocket probing depths 4–5 mm.<br>(SRP+plac) Day 0: 38.1 ± 16.37;<br>30d: 45.3 ± 10.38;<br>(SRP+prob) Day 0: 50.1 ± 17.92;<br>30d: 40.4 ± 17.76.<br>% sites with pocket probing depths ≥ 6 mm.<br>(SRP+plac) Day 0: 13.7 ± 16.42;<br>30d: 13.4 ± 13.31;<br>(SRP+prob) Day 0: 12.3 ± 16.13;<br>30d: 7.5 ± 11.40. | (SRP+plac) Day 0: 62.9 ± 24.21;<br>30d: 67.4 ± 16.57;<br>(SRP+prob) Day 0: 69.5 ± 16.95;<br>30d: 52.5 ± 14.25. | (SRP+plac) Day 0: 40.0 ± 23.36;<br>30d: 47.0 ± 17.43;<br>(SRP+prob) Day 0: 55.3 ± 16.39;<br>30d: 29.3 ± 15.04.     | Not reported                                                                                                               | None         | -                                                                                                                  |

%: percentage; *Aa*: *Aggregatibacter actinomycetemcomitans*; atb: antibiotic; BOP: bleeding on probing; CAL: clinical attachment level; CFU: colony forming units; CHX: chlorhexidine; d: day; F: female; *Fn*: *Fusobacterium nucleatum*; GCF: gingival crevicular fluid; GI: gingival index; m: months; M: male; mm: millimeter; NR: not reported; *Pg*: *Porphyromonas gingivalis*; *Pi*: *Prevotella intermedia*; PI: plaque index; plac: placebo; PPD: periodontal probing depth; prob: probiotic; SD: standard deviation; SRP: scaling and root planning; tetra: tetracycline fibers; *Tn*: *Tannerella forsythia*; *Td*: *Treponema denticola*; w: week

## Appendix 5: Statistical methods in detail

PPD

Table 5 - Summary measures of treatment effect of PPD outcome

| studlab                                 | treat1.long                                                          | treat2.long                                                                                                                                               | treat1    | treat2                      | n1 | n2 | TE (treat1) | seTE (treat1) | TE (treat2) | seTE (treat2) | TEglobal | seTE (global) |
|-----------------------------------------|----------------------------------------------------------------------|-----------------------------------------------------------------------------------------------------------------------------------------------------------|-----------|-----------------------------|----|----|-------------|---------------|-------------|---------------|----------|---------------|
| Abuazab2021(Abuazab et al., 2021)       | SRP                                                                  | SRP + Bbifidum, EMCC #: 1334, Designation: DSM 20082, E 319f, JCM 12                                                                                      | SRP       | Sbbif                       | 10 | 10 | -1.360      | 0.143         | -1.270      | 0.181         | 0.090    | 0.073         |
| Abuazab2021(Abuazab et al., 2021)       | SRP                                                                  | SRP + CHX                                                                                                                                                 | SRP       | SChx                        | 10 | 10 | -1.360      | 0.143         | -1.090      | 0.175         | 0.270    | 0.071         |
| Abuazab2021(Abuazab et al., 2021)       | SRP + Bbifidum, EMCC #: 1334, Designation: DSM 20082, E 319f, JCM 12 | SRP + CHX                                                                                                                                                 | Sbbif     | SChx                        | 10 | 10 | -1.270      | 0.181         | -1.090      | 0.175         | 0.180    | 0.080         |
| Alshareef2020(Alshareef et al., 2020)   | SRP                                                                  | SRP + Lacidophilus, Lcasei, Bbifidum, Lrhamnosus, and Lsalivarius                                                                                         | SRP       | SLacidLcasBbifLrh<br>amLsal | 10 | 15 | -0.275      | 0.190         | -0.356      | 0.094         | -0.081   | 0.055         |
| Butera2020(Butera et al., 2020)         | SRP + CHX toothpaste                                                 | SRP + Bifidobacterium, Lactobacillus (toothpaste)                                                                                                         | SChx      | SBifLactt                   | 20 | 20 | -0.080      | 0.371         | -1.210      | 0.250         | -1.130   | 0.100         |
| Butera2020(Butera et al., 2020)         | SRP + CHX toothpaste                                                 | SRP + Bifidobacterium, Lactobacillus (toothpaste+chewing gum)                                                                                             | SChx      | SBifLacttg                  | 20 | 20 | -0.080      | 0.371         | -2.050      | 0.224         | -1.970   | 0.097         |
| Butera2020(Butera et al., 2020)         | SRP + Bifidobacterium, Lactobacillus (toothpaste)                    | SRP + Bifidobacterium, Lactobacillus (toothpaste+chewing gum)                                                                                             | SBifLactt | SBifLacttg                  | 20 | 20 | -1.210      | 0.250         | -2.050      | 0.224         | -0.840   | 0.075         |
| Chandra2016(Chandra et al., 2016)       | SRP                                                                  | SRP + Saccharomyces boulardii ( $\geq 5$ billion CFU)                                                                                                     | SRP       | Ssbou                       | 27 | 28 | -1.910      | 0.235         | -3.470      | 0.168         | -1.560   | 0.055         |
| Costacurta2018(Costacurta et al., 2018) | SRP                                                                  | SRP + Lreuteri ( $1 \times 10^8$ CFU) for DSM17938 and ATCC PTA5289                                                                                       | SRP       | SLreutDA                    | 20 | 20 | -0.600      | 0.165         | -0.650      | 0.246         | -0.050   | 0.066         |
| deOliveira2022(deOliveira et al., 2022) | SRP + placebo                                                        | SRP + Lactobacillus spp. and 3 of Bifidobacterium spp.                                                                                                    | Splac     | SLsppBssp                   | 23 | 19 | -0.580      | 0.105         | -0.640      | 0.111         | -0.060   | 0.033         |
| Dhaliwal2017(Dhaliwal et al., 2017)     | SRP                                                                  | Sfaecalis T-110 JPC -30 million CFU, Clostridium butyricum TO-A IHS-2 million CFU, Bmesentericus TO-A JPC-1million CFU and Lsporogenes IHS-50 million CFU | SRP       | SfaeCbut<br>BmesLspo        | 13 | 14 | -0.820      | 0.264         | -0.920      | 0.456         | -0.100   | 0.145         |
| El-bagoory2021(El-Bagoory et al., 2021) | SRP                                                                  | SRP + Lreuteri DSM 17938 ( $1 \times 10^8$ CFU)                                                                                                           | SRP       | SLreutD                     | 6  | 6  | -1.000      | 0.336         | -1.800      | 0.236         | -0.800   | 0.168         |
| Ghasemi2020(Ghasemi et al., 2020)       | SRP + placebo                                                        | SRP + $15 \times 10^9$ probiotic units per capsule), Blactis, Lacidophilus, Bbifidum, Lrhamnosus                                                          | Splac     | SBlacLacidBbifLrh<br>am     | 18 | 18 | -0.810      | 0.209         | -1.360      | 0.215         | -0.550   | 0.071         |

|                                                      |                                                                                                |                                                                                                                                                                                    |                  |                          |    |    |        |       |        |       |        |       |
|------------------------------------------------------|------------------------------------------------------------------------------------------------|------------------------------------------------------------------------------------------------------------------------------------------------------------------------------------|------------------|--------------------------|----|----|--------|-------|--------|-------|--------|-------|
| <b>Grover(Grover)</b>                                | SRP                                                                                            | SRP + Bifilac lozenges (Sfaecalis T-110 JPC -30 million CFU, Clostridium butyricum TO-A IHS-2 million CFU, Bmesentericus TO-A JPC-1million CFU and Lsporogenes IHS-50 million CFU) | SRP              | SfaeCbut<br>BmesLsp<br>o | 15 | 15 | -0.820 | 0.246 | -0.920 | 0.440 | -0.100 | 0.130 |
| <b>Ikram2019(Ikram et al., 2019)</b>                 | SRP + placebo                                                                                  | SRP + L. reuteri 1.2 billion CFU/g                                                                                                                                                 | Splac            | Slreut                   | 14 | 14 | -0.300 | 0.365 | -1.780 | 0.280 | -1.480 | 0.123 |
| <b>Ince2015(Ince et al., 2015)</b>                   | SRP + placebo                                                                                  | SRP + Lreuteri (1x10 <sup>8</sup> CFU) for DSM17938 and ATCC PTA5289                                                                                                               | Splac            | SLreutD<br>A             | 15 | 15 | -0.560 | 0.144 | -1.700 | 0.180 | -1.140 | 0.060 |
| <b>Invernici2018(Invernici et al., 2018)</b>         | SRP + placebo                                                                                  | SRP + Bifidobacterium lactis HN019 (1X10 <sup>9</sup> CFU)                                                                                                                         | Splac            | SBlactis                 | 21 | 20 | -0.250 | 0.120 | -0.520 | 0.085 | -0.270 | 0.033 |
| <b>Invernici2020(Invernici et al., 2020)</b>         | SRP + placebo                                                                                  | SRP + Bifidobacterium lactis HN019 (1X10 <sup>9</sup> CFU)                                                                                                                         | Splac            | SBlactis                 | 15 | 15 | NA     | NA    | NA     | NA    | NA     | NA    |
| <b>Jebin2021(Jebin et al., 2021)</b>                 | SRP                                                                                            | SRP + Lreuteri UBLRu-87 ( 0.5 billion CFU)                                                                                                                                         | SRP              | SLreutU                  | 13 | 14 | -0.850 | 0.153 | -1.670 | 0.199 | 2.520  | 0.069 |
| <b>Kanagaraj2019(Kanagaraj et al., 2019)</b>         | SRP + placebo                                                                                  | SRP + Lsporogenes 100 million, Sfaecalis Scientific Name Search PC 60 million, Clostridium butyrium TO-A 4 million, and Bmesentericus TO-A JPC 2 million                           | Splac            | LspoSfae<br>CbutBme<br>s | 30 | 30 | -2.630 | 0.100 | -3.500 | 0.107 | -0.870 | 0.027 |
| <b>Kumar2021(Kumar et al., 2021)</b>                 | SRP + placebo                                                                                  | SRP + 5.9 billion CFU) of Lreuteri per gram and maltodextrin as a carrier (single application)                                                                                     | Splac            | SLreutsin<br>gle         | 15 | 15 | -1.640 | 0.208 | -1.860 | 0.239 | -0.220 | 0.082 |
| <b>Kumar2021(Kumar et al., 2021)</b>                 | SRP + placebo                                                                                  | SRP + 5.9 billion CFU) of Lreuteri per gram and maltodextrin as a carrier (incremental application)                                                                                | Splac            | Slreutincr<br>em         | 15 | 15 | -1.640 | 0.208 | -1.720 | 0.270 | -0.080 | 0.088 |
| <b>Kumar2021(Kumar et al., 2021)</b>                 | SRP + 5.9 billion CFU) of Lreuteri per gram and maltodextrin as a carrier (single application) | SRP + 5.9 billion CFU) of Lreuteri per gram and maltodextrin as a carrier (incremental application)                                                                                | SLreutsin<br>gle | Slreutincr<br>em         | 15 | 15 | -1.860 | 0.239 | -1.720 | 0.270 | 0.140  | 0.093 |
| <b>Laleman2015(Laleman et al., 2015)</b>             | SRP + placebo                                                                                  | SRP + Soralis KJ3, Suberis KJ2 and Srattus JH145(≥ 10 <sup>8</sup> CFU)                                                                                                            | Splac            | SSoralube<br>rrat        | 24 | 24 | -1.610 | 0.143 | -1.510 | 0.142 | 0.100  | 0.041 |
| <b>Meenakshi2020(Meenakshi &amp; Varghese, 2018)</b> | SRP                                                                                            | SRP + Lcasei (dosage not specified)                                                                                                                                                | SRP              | SLcas                    | 10 | 10 | -0.320 | 0.316 | -1.140 | 0.203 | -0.820 | 0.119 |
| <b>Minic2020(Minic et al., 2022)</b>                 | SRP                                                                                            | SRP + 6.5 billion live L acidophilus, concentration of 107 CFU, at least 107 CFU Binfantis and at least 106 CFU Efaecium colony-forming                                            | SRP              | SRPLacid<br>BinEfae      | 40 | 40 | -0.500 | 0.105 | -1.220 | 0.081 | -0.720 | 0.021 |
| <b>Morales2016(Morales et al., 2016)</b>             | SRP + placebo                                                                                  | SRP + LrhamanosusSP1 (2X10 <sup>7</sup> CFU)                                                                                                                                       | Splac            | SLrham                   | 14 | 14 | -0.500 | 0.096 | -0.600 | 0.209 | -0.100 | 0.061 |
| <b>Oliveira2021(Oliveira et al., 2021)</b>           | SRP + placebo                                                                                  | SRP + Lactobacillus spp. and 3 of Bifidobacterium spp.                                                                                                                             | Splac            | SLsppBsp<br>p            | 23 | 19 | -0.580 | 0.105 | -0.640 | 0.111 | -0.060 | 0.033 |
| <b>Özener2023(Ozener et al., 2023)</b>               | SRP + placebo                                                                                  | SRP + B. lactis DN-173010, ≥108 CFU                                                                                                                                                | Splac            | SBlactDN                 | 15 | 15 | -0.530 | 0.143 | -0.710 | 0.135 | -0.180 | 0.051 |
| <b>Paul2019(Paul et al., 2019)</b>                   | SRP + placebo                                                                                  | SRP + Lbrevis (dosage not reported)                                                                                                                                                | Splac            | Slbrevis                 | 13 | 14 | -0.803 | 0.343 | -0.707 | 0.274 | 0.096  | 0.119 |
| <b>Pelekos2020(Pelekos et al., 2020)</b>             | SRP + placebo                                                                                  | SRP + Lreuteri (1x10 <sup>8</sup> CFU) for DSM17938 and ATCC PTA5289                                                                                                               | Splac            | SLreutD<br>A             | 20 | 20 | -1.410 | 0.569 | -1.400 | 0.406 | 0.010  | 0.156 |
| <b>Penala2016(Penala et al., 2016)</b>               | SRP + placebo                                                                                  | SRP + L salivarius (2 × 10 <sup>9</sup> CFU) and Lreuteri (2 × 10 <sup>9</sup> CFU)                                                                                                | Splac            | LSalreut                 | 14 | 15 | NA     | NA    | NA     | NA    | NA     | NA    |

|                                            |               |                                                                                                                                                                                       |       |                      |    |    |        |       |        |       |        |       |
|--------------------------------------------|---------------|---------------------------------------------------------------------------------------------------------------------------------------------------------------------------------------|-------|----------------------|----|----|--------|-------|--------|-------|--------|-------|
| <b>Pudgar2021(Pudgar et al., 2021)</b>     | SRP + placebo | SRP + Lbrevis (CECT7480) and Lplantarum (CECT7481) (1.2 × 10 <sup>9</sup> CFU/ml of each bacterium)                                                                                   | Splac | SLbrevisplant        | 20 | 20 | -0.900 | 0.143 | -0.900 | 0.096 | 0.000  | 0.039 |
| <b>Ranjith2021(Ranjith et al., 2022)</b>   | SRP + placebo | SRP + Darolac, Aristo pharmaceuticals, India containing 1 g powder of 1.25 billion freeze-dried combination of a mixture of L. acidophilus, L. rhamnosus, B. longum and S. boulardii. | Splac | SLacidLrhaBlongSboul | 27 | 28 | -0.260 | 0.042 | -0.750 | 0.057 | -0.490 | 0.014 |
| <b>Tekce2015(Tekce et al., 2015)</b>       | SRP + placebo | SRP + Lreuteri (1x10 <sup>8</sup> CFU) for DSM17938 and ATCC PTA5289                                                                                                                  | Splac | SLreutDA             | 20 | 20 | -0.560 | 0.225 | -1.740 | 0.247 | -1.180 | 0.075 |
| <b>Teughels2013(Teughels et al., 2013)</b> | SRP + placebo | SRP + Lreuteri (1x10 <sup>8</sup> CFU) for DSM17938 and ATCC PTA5289                                                                                                                  | Splac | SLreutDA             | 15 | 15 | -1.390 | 0.165 | -1.420 | 0.235 | -0.030 | 0.074 |
| <b>Theodoro2019(Theodoro et al., 2019)</b> | SRP + placebo | SRP + Lreuteri DSM 17938 (1×10 <sup>8</sup> CFU)                                                                                                                                      | Splac | SLreutD              | 14 | 14 | -0.150 | 0.152 | -0.250 | 0.186 | -0.100 | 0.064 |
| <b>Tsubura2009(Tsubura et al., 2009)</b>   | SRP + control | SRP + B subtilis: E-300                                                                                                                                                               | Scont | Sbsub                | 27 | 27 | -1.200 | 0.170 | -0.600 | 0.185 | 0.600  | 0.048 |
| <b>Vicario2013(Vicario et al., 2013)</b>   | SRP + placebo | SRP + L reuteri ATCC 55730 and ATCCPTA 5289) (2X10 <sup>8</sup> CFU)                                                                                                                  | Splac | SLreutAA             | 9  | 10 | NA     | NA    | NA     | NA    | NA     | NA    |

CFU: colony forming units; CHX: chlorhexidine; SRP: scaling and root planning.

Table 6 - Summary measures of treatment effect of CAL outcome

| studlab                                 | treat1.long                                                          | treat2.long                                                                                                                                                                        | treat1    | treat2                   | n1 | n2 | TE (treat1) | seTE (treat1) | TE (treat2) | seTE (treat2) | TEglobal | seTE (global) |
|-----------------------------------------|----------------------------------------------------------------------|------------------------------------------------------------------------------------------------------------------------------------------------------------------------------------|-----------|--------------------------|----|----|-------------|---------------|-------------|---------------|----------|---------------|
| Abuazab2021(Abuazab et al., 2021)       | SRP                                                                  | SRP + Bbifidum, EMCC #: 1334, Designation: DSM 20082, E 319f, JCM 12                                                                                                               | SRP       | Sbbif                    | 10 | 10 | -0.530      | 0.148         | -0.920      | 0.168         | -0.390   | 0.071         |
| Abuazab2021(Abuazab et al., 2021)       | SRP                                                                  | SRP + CHX                                                                                                                                                                          | SRP       | SChx                     | 10 | 10 | -0.530      | 0.148         | -0.610      | 0.168         | -0.080   | 0.071         |
| Abuazab2021(Abuazab et al., 2021)       | SRP + Bbifidum, EMCC #: 1334, Designation: DSM 20082, E 319f, JCM 12 | SRP + CHX                                                                                                                                                                          | Sbbif     | SChx                     | 10 | 10 | -0.920      | 0.168         | -0.610      | 0.168         | 0.310    | 0.075         |
| Alshareef2020(Alshareef et al., 2020)   | SRP                                                                  | SRP + Lacidophilus, Lcasei, Bbifidum, Lrhamnosus, and Lsalivarius                                                                                                                  | SRP       | SLacidLcasBbifLrh amLsal | 10 | 15 | -0.344      | 0.294         | -0.425      | 0.214         | -0.081   | 0.101         |
| Butera2020(Butera et al., 2020)         | SRP + CHX toothpaste                                                 | SRP + Bifidobacterium, Lactobacillus (toothpaste)                                                                                                                                  | SChx      | SBifLactt                | 20 | 20 | -0.260      | 0.568         | -1.200      | 0.698         | -0.940   | 0.201         |
| Butera2020(Butera et al., 2020)         | SRP + CHX toothpaste                                                 | SRP + Bifidobacterium, Lactobacillus (toothpaste+chewing gum)                                                                                                                      | SChx      | SBifLacttg               | 20 | 20 | -0.260      | 0.568         | -1.900      | 0.388         | -1.640   | 0.154         |
| Butera2020(Butera et al., 2020)         | SRP + Bifidobacterium, Lactobacillus (toothpaste)                    | SRP + Bifidobacterium, Lactobacillus (toothpaste+chewing gum)                                                                                                                      | SBifLactt | SBifLacttg               | 20 | 20 | -1.200      | 0.698         | -1.900      | 0.388         | -0.700   | 0.179         |
| Chandra2016(Chandra et al., 2016)       | SRP                                                                  | SRP + Saccharomyces boulardii ( $\geq 5$ billion CFU)                                                                                                                              | SRP       | Ssbou                    | 27 | 28 | -1.720      | 0.227         | -2.960      | 0.178         | -1.240   | 0.055         |
| Costacurta2018(Costacurta et al., 2018) | SRP                                                                  | SRP + Lreuteri ( $1 \times 10^8$ CFU) for DSM17938 and ATCC PTA5289                                                                                                                | SRP       | SLreutDA                 | 20 | 20 | -0.650      | 0.171         | -0.620      | 0.283         | 0.030    | 0.074         |
| deOliveira2022(deOliveira et al., 2022) | SRP + placebo                                                        | SRP + Lactobacillus spp. and 3 of Bifidobacterium spp.                                                                                                                             | Splac     | SLsppBssp                | 23 | 19 | -0.290      | 0.221         | -0.570      | 0.272         | -0.280   | 0.076         |
| Dhaliwal2017(Dhaliwal et al., 2017)     | SRP                                                                  | Sfaecalis T-110 JPC -30 million CFU, Clostridium butyricum TO-A IHS-2 million CFU, Bmesentericus TO-A JPC-1million CFU and Lsporogenes IHS-50 million CFU                          | SRP       | SfaeCbut BmesLspo        | 13 | 14 | -0.960      | 0.365         | -1.290      | 0.514         | -0.330   | 0.173         |
| El-bagoory2021(El-Bagoory et al., 2021) | SRP                                                                  | SRP + Lreuteri DSM 17938 ( $1 \times 10^8$ CFU)                                                                                                                                    | SRP       | SLreutD                  | 6  | 6  | -1.000      | 0.336         | -1.800      | 0.236         | -0.800   | 0.168         |
| Ghasemi2020(Ghasemi et al., 2020)       | SRP + placebo                                                        | SRP + $15 \times 10^9$ probiotic units per capsule), Blactis, Lacidophilus, Bbifidum, Lrhamnosus                                                                                   | Splac     | SBlacLacidBbifLrh am     | 18 | 18 | -0.640      | 0.230         | -1.060      | 0.225         | -0.420   | 0.076         |
| Grover(Grover)                          | SRP                                                                  | SRP + Bifilac lozenges (Sfaecalis T-110 JPC -30 million CFU, Clostridium butyricum TO-A IHS-2 million CFU, Bmesentericus TO-A JPC-1million CFU and Lsporogenes IHS-50 million CFU) | SRP       | SfaeCbut BmesLspo        | 15 | 15 | -0.960      | 0.339         | -1.290      | 0.497         | -0.330   | 0.155         |
| Ikram2019(Ikram et al., 2019)           | SRP + placebo                                                        | SRP + L. reuteri 1.2 billion CFU/g                                                                                                                                                 | Splac     | Slreut                   | 14 | 14 | -0.260      | 0.253         | -0.840      | 0.217         | -0.580   | 0.089         |

|                                                      |                                                                                                |                                                                                                                                                                                       |              |                      |    |    |        |       |        |       |        |       |
|------------------------------------------------------|------------------------------------------------------------------------------------------------|---------------------------------------------------------------------------------------------------------------------------------------------------------------------------------------|--------------|----------------------|----|----|--------|-------|--------|-------|--------|-------|
| <b>Ince2015(Ince et al., 2015)</b>                   | SRP + placebo                                                                                  | SRP + Lreuteri (1x10 <sup>8</sup> CFU) for DSM17938 and ATCC PTA5289                                                                                                                  | Splac        | SLreutDA             | 15 | 15 | NA     | NA    | NA     | NA    | NA     | NA    |
| <b>Invernici2018(Invernici et al., 2018)</b>         | SRP + placebo                                                                                  | SRP + Bifidobacterium lactis HN019 (1X10 <sup>9</sup> CFU)                                                                                                                            | Splac        | SBlactis             | 21 | 20 | -0.180 | 0.162 | -0.490 | 0.122 | -0.310 | 0.045 |
| <b>Invernici2020(Invernici et al., 2020)</b>         | SRP + placebo                                                                                  | SRP + Bifidobacterium lactis HN019 (1X10 <sup>9</sup> CFU)                                                                                                                            | Splac        | SBlactis             | 15 | 15 | NA     | NA    | NA     | NA    | NA     | NA    |
| <b>Jebin2021(Jebin et al., 2021)</b>                 | SRP                                                                                            | SRP + Lreuteri UBLRu-87 ( 0.5 billion CFU)                                                                                                                                            | SRP          | SLreutU              | 13 | 14 | -0.670 | 0.080 | -1.020 | 0.176 | -0.350 | 0.053 |
| <b>Kanagaraj2019(Kanagaraj et al., 2019)</b>         | SRP + placebo                                                                                  | SRP + Lsporigenes 100 million, Sfaecalis Scientific Name Search PC 60 million, Clostridium butyrium TO-A 4 million, and Bmesentericus TO-A JPC 2 million                              | Splac        | LspoSfaeCbutBmes     | 30 | 30 | -1.820 | 0.079 | -2.550 | 0.089 | -0.730 | 0.022 |
| <b>Kumar2021(Kumar et al., 2021)</b>                 | SRP + placebo                                                                                  | SRP + 5.9 billion CFU) of Lreuteri per gram and maltodextrin as a carrier (single application)                                                                                        | Splac        | SLreutsingle         | 15 | 15 | -1.130 | 0.287 | -1.450 | 0.248 | -0.320 | 0.098 |
| <b>Kumar2021(Kumar et al., 2021)</b>                 | SRP + placebo                                                                                  | SRP + 5.9 billion CFU) of Lreuteri per gram and maltodextrin as a carrier (incremental application)                                                                                   | Splac        | Sltreutincrem        | 15 | 15 | -1.130 | 0.287 | -1.560 | 0.253 | -0.430 | 0.099 |
| <b>Kumar2021(Kumar et al., 2021)</b>                 | SRP + 5.9 billion CFU) of Lreuteri per gram and maltodextrin as a carrier (single application) | SRP + 5.9 billion CFU) of Lreuteri per gram and maltodextrin as a carrier (incremental application)                                                                                   | SLreutsingle | Sltreutincrem        | 15 | 15 | -1.450 | 0.248 | -1.560 | 0.253 | -0.110 | 0.091 |
| <b>Laleman2015(Laleman et al., 2015)</b>             | SRP + placebo                                                                                  | SRP + Soralis KJ3, Suberis KJ2 and Srattus JH145(≥ 10 <sup>8</sup> CFU)                                                                                                               | Splac        | SSoraluberrat        | 24 | 24 | -0.760 | 0.134 | -0.710 | 0.118 | 0.050  | 0.036 |
| <b>Meenakshi2020(Meenakshi &amp; Varghese, 2018)</b> | SRP                                                                                            | SRP + Lcasei (dosage not specified)                                                                                                                                                   | SRP          | SLcas                | 10 | 10 | -0.350 | 0.242 | -0.940 | 0.210 | -0.590 | 0.101 |
| <b>Minic2020(Minic et al., 2022)</b>                 | SRP                                                                                            | SRP + 6.5 billion live L acidophilus, concentration of 107 CFU, at least 107 CFU Binfantis and at least 106 CFU Efaecium colony-forming                                               | SRP          | SRPLacidBinfEfae     | 40 | 40 | NA     | NA    | NA     | NA    | NA     | NA    |
| <b>Morales2016(Morales et al., 2016)</b>             | SRP + placebo                                                                                  | SRP + LrhamanosusSP1 (2X10 <sup>7</sup> CFU)                                                                                                                                          | Splac        | SLrham               | 14 | 14 | -0.100 | 0.491 | -0.100 | 0.360 | 0.000  | 0.163 |
| <b>Oliveira2021(Oliveira et al., 2021)</b>           | SRP + placebo                                                                                  | SRP + Lactobacillus spp. and 3 of Bifidobacterium spp.                                                                                                                                | Splac        | SLsppBssp            | 23 | 19 | -0.290 | 0.221 | -0.570 | 0.271 | -0.280 | 0.076 |
| <b>Özener2023(Ozener et al., 2023)</b>               | SRP + placebo                                                                                  | SRP + B. lactis DN-173010, ≥108 CFU                                                                                                                                                   | Splac        | SBlactDN             | 15 | 15 | -0.510 | 0.163 | -0.670 | 0.150 | -0.160 | 0.057 |
| <b>Paul2019(Paul et al., 2019)</b>                   | SRP + placebo                                                                                  | SRP + Lbrevis (dosage not reported)                                                                                                                                                   | Splac        | SLbrevis             | 13 | 14 | -0.808 | 0.282 | -0.447 | 0.407 | 0.361  | 0.136 |
| <b>Pelekos2020(Pelekos et al., 2020)</b>             | SRP + placebo                                                                                  | SRP + Lreuteri (1x10 <sup>8</sup> CFU) for DSM17938 and ATCC PTA5289                                                                                                                  | Splac        | SLreutDA             | 20 | 20 | -0.520 | 0.776 | -0.540 | 0.663 | -0.020 | 0.228 |
| <b>Penala2016(Penala et al., 2016)</b>               | SRP + placebo                                                                                  | SRP + L salivarius (2 × 10 <sup>9</sup> CFU) and Lreuteri (2 × 10 <sup>9</sup> CFU)                                                                                                   | Splac        | LSalreut             | 14 | 15 | NA     | NA    | NA     | NA    | NA     | NA    |
| <b>Pudgar2021(Pudgar et al., 2021)</b>               | SRP + placebo                                                                                  | SRP + Lbrevis (CECT7480) and Lplantarum (CECT7481) (1.2 × 10 <sup>9</sup> CFU/ml of each bacterium)                                                                                   | Splac        | SLbrevisplant        | 20 | 20 | -0.800 | 0.413 | -0.700 | 0.256 | 0.100  | 0.109 |
| <b>Ranjith2021(Ranjith et al., 2022)</b>             | SRP + placebo                                                                                  | SRP + Darolac, Aristo pharmaceuticals, India containing 1 g powder of 1.25 billion freeze-dried combination of a mixture of L. acidophilus, L. rhamnosus, B. longum and S. boulardii. | Splac        | SLacidLrhaBlongSboul | 27 | 28 | -0.180 | 0.036 | -1.230 | 0.043 | -1.050 | 0.011 |



|                                            |               |                                                                      |       |              |    |    |        |       |        |       |        |       |
|--------------------------------------------|---------------|----------------------------------------------------------------------|-------|--------------|----|----|--------|-------|--------|-------|--------|-------|
| <b>Tekce2015(Tekce et al., 2015)</b>       | SRP + placebo | SRP + Lreuteri (1x10 <sup>8</sup> CFU) for DSM17938 and ATCC PTA5289 | Splac | SLreutD<br>A | 20 | 20 | NA     | NA    | NA     | NA    | NA     | NA    |
| <b>Teughels2013(Teughels et al., 2013)</b> | SRP + placebo | SRP + Lreuteri (1x10 <sup>8</sup> CFU) for DSM17938 and ATCC PTA5289 | Splac | SLreutD<br>A | 15 | 15 | -0.760 | 0.234 | -1.000 | 0.362 | -0.240 | 0.111 |
| <b>Theodoro2019(Theodoro et al., 2019)</b> | SRP + placebo | SRP + Lreuteri DSM 17938 (1x10 <sup>8</sup> CFU)                     | Splac | SLreutD      | 14 | 14 | -0.060 | 0.187 | -0.430 | 0.331 | -0.370 | 0.102 |
| <b>Tsubura2009(Tsubura et al., 2009)</b>   | SRP + control | SRP + B subtilis: E-300                                              | Scont | Sbsub        | 27 | 27 | NA     | NA    | NA     | NA    | NA     | NA    |
| <b>Vicario2013(Vicario et al., 2013)</b>   | SRP + placebo | SRP + L reuteri ATCC 55730 and ATCCPTA 5289) (2X10 <sup>8</sup> CFU) | Splac | SLreutA<br>A | 9  | 10 | NA     | NA    | NA     | NA    | NA     | NA    |

CFU: colony forming units; CHX: chlorhexidine; SRP: scaling and root planning.

BOP

Table 7 - Summary measures of treatment effect of BOP outcome

| studlab                                 | treat1.long                                                          | treat2.long                                                                                                                                                                        | treat1    | treat2                   | n1 | n2 | TE (treat1) | seTE (treat1) | TE (treat2) | seTE (treat2) | TEglobal | seTE (global) |
|-----------------------------------------|----------------------------------------------------------------------|------------------------------------------------------------------------------------------------------------------------------------------------------------------------------------|-----------|--------------------------|----|----|-------------|---------------|-------------|---------------|----------|---------------|
| Abuazab2021(Abuazab et al., 2021)       | SRP                                                                  | SRP + Bbifidum, EMCC #: 1334, Designation: DSM 20082, E 319f, JCM 12                                                                                                               | SRP       | Sbbif                    | 10 | 10 | NA          | NA            | NA          | NA            | NA       | NA            |
| Abuazab2021(Abuazab et al., 2021)       | SRP                                                                  | SRP + CHX                                                                                                                                                                          | SRP       | SChx                     | 10 | 10 | NA          | NA            | NA          | NA            | NA       | NA            |
| Abuazab2021(Abuazab et al., 2021)       | SRP + Bbifidum, EMCC #: 1334, Designation: DSM 20082, E 319f, JCM 12 | SRP + CHX                                                                                                                                                                          | Sbbif     | SChx                     | 10 | 10 | NA          | NA            | NA          | NA            | NA       | NA            |
| Alshareef2020(Alshareef et al., 2020)   | SRP                                                                  | SRP + Lacidophilus, Lcasei, Bbifidum, Lrhamnosus, and Lsalivarius                                                                                                                  | SRP       | SLacidLcasBbifLrh amLsal | 10 | 15 | -8.935      | 6.072         | -8.600      | 3.308         | 0.335    | 1.875         |
| Butera2020(Butera et al., 2020)         | SRP + CHX toothpaste                                                 | SRP + Bifidobacterium, Lactobacillus (toothpaste)                                                                                                                                  | SChx      | SBifLactt                | 20 | 20 | -2.250      | 4.966         | -34.000     | 7.203         | -31.750  | 1.956         |
| Butera2020(Butera et al., 2020)         | SRP + CHX toothpaste                                                 | SRP + Bifidobacterium, Lactobacillus (toothpaste+chewing gum)                                                                                                                      | SChx      | SBifLacttg               | 20 | 20 | -2.250      | 4.966         | -44.650     | 8.733         | -42.400  | 2.246         |
| Butera2020(Butera et al., 2020)         | SRP + Bifidobacterium, Lactobacillus (toothpaste)                    | SRP + Bifidobacterium, Lactobacillus (toothpaste+chewing gum)                                                                                                                      | SBifLactt | SBifLacttg               | 20 | 20 | -34.000     | 7.203         | -44.650     | 8.733         | -10.650  | 2.531         |
| Chandra2016(Chandra et al., 2016)       | SRP                                                                  | SRP + Saccharomyces boulardii ( $\geq 5$ billion CFU)                                                                                                                              | SRP       | Ssbou                    | 27 | 28 | NA          | NA            | NA          | NA            | NA       | NA            |
| Costacurta2018(Costacurta et al., 2018) | SRP                                                                  | SRP + Lreuteri ( $1 \times 10^8$ CFU) for DSM17938 and ATCC PTA5289                                                                                                                | SRP       | SLreutDA                 | 20 | 20 | -30.300     | 3.166         | -56.050     | 4.861         | -25.750  | 1.297         |
| deOliveira2022(deOliveira et al., 2022) | SRP + placebo                                                        | SRP + Lactobacillus spp. and 3 of Bifidobacterium spp.                                                                                                                             | Splac     | SLsppBssp                | 23 | 19 | -20.400     | 4.587         | -21.100     | 6.790         | -0.700   | 1.762         |
| Dhaliwal2017(Dhaliwal et al., 2017)     | SRP                                                                  | Sfaecalis T-110 JPC -30 million CFU, Clostridium butyricum TO-A IHS-2 million CFU, Bmesentericus TO-A JPC-1million CFU and Lsporogenes IHS-50 million CFU                          | SRP       | SfaeCbut BmesLspo        | 13 | 14 | NA          | NA            | NA          | NA            | NA       | NA            |
| El-Bagoory2021(El-Bagoory et al., 2021) | SRP                                                                  | SRP + Lreuteri DSM 17938 ( $1 \times 10^8$ CFU)                                                                                                                                    | SRP       | SLreutD                  | 6  | 6  | NA          | NA            | NA          | NA            | NA       | NA            |
| Ghasemi2020(Ghasemi et al., 2020)       | SRP + placebo                                                        | SRP + $15 \times 10^9$ probiotic units per capsule), Blactis, Lacidophilus, Bbifidum, Lrhamnosus                                                                                   | Splac     | SBlacLacidBbifLrh am     | 18 | 18 | -24.100     | 2.890         | -29.490     | 3.163         | -5.390   | 1.010         |
| Grover(Grover)                          | SRP                                                                  | SRP + Bifilac lozenges (Sfaecalis T-110 JPC -30 million CFU, Clostridium butyricum TO-A IHS-2 million CFU, Bmesentericus TO-A JPC-1million CFU and Lsporogenes IHS-50 million CFU) | SRP       | SfaeCbut BmesLspo        | 15 | 15 | NA          | NA            | NA          | NA            | NA       | NA            |
| Ikram2019(Ikram et al., 2019)           | SRP + placebo                                                        | SRP + L. reuteri 1.2 billion CFU/g                                                                                                                                                 | Splac     | Slreut                   | 14 | 14 | -25.700     | 6.892         | -56.580     | 3.271         | -30.880  | 2.039         |

|                                                      |                                                                                                |                                                                                                                                                                                       |              |                      |    |    |         |       |         |       |         |       |
|------------------------------------------------------|------------------------------------------------------------------------------------------------|---------------------------------------------------------------------------------------------------------------------------------------------------------------------------------------|--------------|----------------------|----|----|---------|-------|---------|-------|---------|-------|
| <b>Ince2015(Ince et al., 2015)</b>                   | SRP + placebo                                                                                  | SRP + Lreuteri (1x10 <sup>8</sup> CFU) for DSM17938 and ATCC PTA5289                                                                                                                  | Splac        | SLreutDA             | 15 | 15 | -69.650 | 1.756 | -77.300 | 2.274 | -7.650  | 0.742 |
| <b>Invernici2018(Invernici et al., 2018)</b>         | SRP + placebo                                                                                  | SRP + Bifidobacterium lactis HN019 (1X10 <sup>9</sup> CFU)                                                                                                                            | Splac        | SBlactis             | 21 | 20 | -4.290  | 8.292 | -12.000 | 6.114 | -7.710  | 2.285 |
| <b>Invernici2020(Invernici et al., 2020)</b>         | SRP + placebo                                                                                  | SRP + Bifidobacterium lactis HN019 (1X10 <sup>9</sup> CFU)                                                                                                                            | Splac        | SBlactis             | 15 | 15 | -1.970  | 2.954 | -3.250  | 2.542 | -1.280  | 1.006 |
| <b>Jebin2021(Jebin et al., 2021)</b>                 | SRP                                                                                            | SRP + Lreuteri UBLRu-87 ( 0.5 billion CFU)                                                                                                                                            | SRP          | SLreutU              | 13 | 14 | NA      | NA    | NA      | NA    | NA      | NA    |
| <b>Kanagaraj2019(Kanagaraj et al., 2019)</b>         | SRP + placebo                                                                                  | SRP + Lspirogenes 100 million, Sfaecalis Scientific Name Search PC 60 million, Clostridium butyrium TO-A 4 million, and Bmesentericus TO-A JPC 2 million                              | Splac        | LspoSfaeCbutBmes     | 30 | 30 | -0.340  | 0.116 | -1.110  | 0.118 | -0.770  | 0.030 |
| <b>Kumar2021(Kumar et al., 2021)</b>                 | SRP + placebo                                                                                  | SRP + 5.9 billion CFU) of Lreuteri per gram and maltodextrin as a carrier (single application)                                                                                        | Splac        | SLreutsingle         | 15 | 15 | -38.340 | 7.689 | -58.330 | 6.577 | -19.990 | 2.613 |
| <b>Kumar2021(Kumar et al., 2021)</b>                 | SRP + placebo                                                                                  | SRP + 5.9 billion CFU) of Lreuteri per gram and maltodextrin as a carrier (incremental application)                                                                                   | Splac        | SLreutincrem         | 15 | 15 | -38.340 | 7.689 | -61.650 | 5.600 | -23.310 | 2.456 |
| <b>Kumar2021(Kumar et al., 2021)</b>                 | SRP + 5.9 billion CFU) of Lreuteri per gram and maltodextrin as a carrier (single application) | SRP + 5.9 billion CFU) of Lreuteri per gram and maltodextrin as a carrier (incremental application)                                                                                   | SLreutsingle | SLreutincrem         | 15 | 15 | -58.330 | 6.577 | -61.650 | 5.600 | -3.320  | 2.230 |
| <b>Laleman2015(Laleman et al., 2015)</b>             | SRP + placebo                                                                                  | SRP + Soralis KJ3, Suberis KJ2 and Srattus JH145(≥ 10 <sup>8</sup> CFU)                                                                                                               | Splac        | SSoraluberrrat       | 24 | 24 | -55.440 | 2.586 | -60.460 | 2.269 | -5.020  | 0.702 |
| <b>Meenakshi2020(Meenakshi &amp; Varghese, 2018)</b> | SRP                                                                                            | SRP + Lcasei (dosage not specified)                                                                                                                                                   | SRP          | SLcas                | 10 | 10 | NA      | NA    | NA      | NA    | NA      | NA    |
| <b>Minic2020(Minic et al., 2022)</b>                 | SRP                                                                                            | SRP + 6.5 billion live L acidophilus, concentration of 107 CFU, at least 107 CFU Binfantis and at least 106 CFU Efaecium colony-forming                                               | SRP          | SRPLacidBinEfae      | 40 | 40 | -1.050  | 0.064 | -1.620  | 0.056 | -0.570  | 0.013 |
| <b>Morales2016(Morales et al., 2016)</b>             | SRP + placebo                                                                                  | SRP + LrhamanosusSP1 (2X10 <sup>7</sup> CFU)                                                                                                                                          | Splac        | SLrham               | 14 | 14 | -8.400  | 5.108 | -11.800 | 5.523 | -3.400  | 2.011 |
| <b>Oliveira2021(Oliveira et al., 2021)</b>           | SRP + placebo                                                                                  | SRP + Lactobacillus spp. and 3 of Bifidobacterium spp.                                                                                                                                | Splac        | SLsppBssp            | 23 | 19 | -20.400 | 4.587 | -21.100 | 6.790 | 0.000   | 2.105 |
| <b>Özener2023(Ozener et al., 2023)</b>               | SRP + placebo                                                                                  | SRP + B. lactis DN-173010, ≥108 CFU                                                                                                                                                   | Splac        | SBlactDN             | 15 | 15 | -26.820 | 4.124 | -42.120 | 5.734 | -15.300 | 1.824 |
| <b>Paul2019(Paul et al., 2019)</b>                   | SRP + placebo                                                                                  | SRP + Lbrevis (dosage not reported)                                                                                                                                                   | Splac        | SLbrevis             | 13 | 14 | -0.362  | 0.082 | -0.157  | 0.099 | 0.205   | 0.035 |
| <b>Pelekos2020(Pelekos et al., 2020)</b>             | SRP + placebo                                                                                  | SRP + Lreuteri (1x10 <sup>8</sup> CFU) for DSM17938 and ATCC PTA5289                                                                                                                  | Splac        | SLreutDA             | 20 | 20 | NA      | NA    | NA      | NA    | NA      | NA    |
| <b>Penala2016(Penala et al., 2016)</b>               | SRP + placebo                                                                                  | SRP + L salivarius (2 × 10 <sup>9</sup> CFU) and Lreuteri (2 × 10 <sup>9</sup> CFU)                                                                                                   | Splac        | LSalreut             | 14 | 15 | NA      | NA    | NA      | NA    | NA      | NA    |
| <b>Pudgar2021(Pudgar et al., 2021)</b>               | SRP + placebo                                                                                  | SRP + Lbrevis (CECT7480) and Lplantarum (CECT7481) (1.2 × 10 <sup>9</sup> CFU/ml of each bacterium)                                                                                   | Splac        | SLbrevisplant        | 20 | 20 | -38.500 | 5.593 | -36.000 | 5.767 | 2.500   | 1.796 |
| <b>Ranjith2021(Ranjith et al., 2022)</b>             | SRP + placebo                                                                                  | SRP + Darolac, Aristo pharmaceuticals, India containing 1 g powder of 1.25 billion freeze-dried combination of a mixture of L. acidophilus, L. rhamnosus, B. longum and S. boulardii. | Splac        | SLacidLrhaBlongSboul | 27 | 28 | NA      | NA    | NA      | NA    | NA      | NA    |

|                                            |               |                                                                      |       |              |    |    |         |       |         |       |         |       |
|--------------------------------------------|---------------|----------------------------------------------------------------------|-------|--------------|----|----|---------|-------|---------|-------|---------|-------|
| <b>Tekce2015(Tekce et al., 2015)</b>       | SRP + placebo | SRP + Lreuteri (1x10 <sup>8</sup> CFU) for DSM17938 and ATCC PTA5289 | Splac | SLreutD<br>A | 20 | 20 | -69.600 | 1.420 | -77.850 | 1.931 | -8.250  | 0.536 |
| <b>Teughels2013(Teughels et al., 2013)</b> | SRP + placebo | SRP + Lreuteri (1x10 <sup>8</sup> CFU) for DSM17938 and ATCC PTA5289 | Splac | SLreutD<br>A | 15 | 15 | -50.950 | 4.003 | -55.190 | 4.853 | -4.240  | 1.624 |
| <b>Theodoro2019(Theodoro et al., 2019)</b> | SRP + placebo | SRP + Lreuteri DSM 17938 (1x10 <sup>8</sup> CFU)                     | Splac | SLreutD      | 14 | 14 | -8.970  | 8.080 | -22.230 | 6.690 | -13.260 | 2.804 |
| <b>Tsubura2009(Tsubura et al., 2009)</b>   | SRP + control | SRP + B subtilis: E-300                                              | Scont | Sbsub        | 27 | 27 | -0.800  | 0.153 | -1.100  | 0.139 | -0.300  | 0.040 |
| <b>Vicario2013(Vicario et al., 2013)</b>   | SRP + placebo | SRP + L reuteri ATCC 55730 and ATCCPTA 5289) (2X10 <sup>8</sup> CFU) | Splac | SLreutA<br>A | 9  | 10 | 7.000   | 9.715 | -26.000 | 7.034 | -33.000 | 3.861 |

CFU: colony forming units; CHX: chlorhexidine; SRP: scaling and root planning.

Table 8 - Summary measures of treatment effect of PI outcome.

| studlab                                 | treat1.long                                                          | treat2.long                                                                                                                                                                        | treat1    | treat2                   | n1 | n2 | TE (treat1) | seTE (treat1) | TE (treat2) | seTE (treat2) | TEglobal | seTE (global) |
|-----------------------------------------|----------------------------------------------------------------------|------------------------------------------------------------------------------------------------------------------------------------------------------------------------------------|-----------|--------------------------|----|----|-------------|---------------|-------------|---------------|----------|---------------|
| Abuazab2021(Abuazab et al., 2021)       | SRP                                                                  | SRP + Bbifidum, EMCC #: 1334, Designation: DSM 20082, E 319f, JCM 12                                                                                                               | SRP       | Sbbif                    | 10 | 10 | NA          | NA            | NA          | NA            | NA       | NA            |
| Abuazab2021(Abuazab et al., 2021)       | SRP                                                                  | SRP + CHX                                                                                                                                                                          | SRP       | SChx                     | 10 | 10 | NA          | NA            | NA          | NA            | NA       | NA            |
| Abuazab2021(Abuazab et al., 2021)       | SRP + Bbifidum, EMCC #: 1334, Designation: DSM 20082, E 319f, JCM 12 | SRP + CHX                                                                                                                                                                          | Sbbif     | SChx                     | 10 | 10 | NA          | NA            | NA          | NA            | NA       | NA            |
| Alshareef2020(Alshareef et al., 2020)   | SRP                                                                  | SRP + Lacidophilus, Lcasei, Bbifidum, Lrhamnosus, and Lsalivarius                                                                                                                  | SRP       | SLacidLcasBbifLrh amLsal | 10 | 15 | -10.009     | 6.229         | -8.269      | 4.704         | 1.740    | 2.185         |
| Butera2020(Butera et al., 2020)         | SRP + CHX toothpaste                                                 | SRP + Bifidobacterium, Lactobacillus (toothpaste)                                                                                                                                  | SChx      | SBifLactt                | 20 | 20 | -3.000      | 7.759         | -34.350     | 5.931         | -31.350  | 2.184         |
| Butera2020(Butera et al., 2020)         | SRP + CHX toothpaste                                                 | SRP + Bifidobacterium, Lactobacillus (toothpaste+chewing gum)                                                                                                                      | SChx      | SBifLacttg               | 20 | 20 | -3.000      | 7.759         | -42.000     | 6.058         | -39.000  | 2.201         |
| Butera2020(Butera et al., 2020)         | SRP + Bifidobacterium, Lactobacillus (toothpaste)                    | SRP + Bifidobacterium, Lactobacillus (toothpaste+chewing gum)                                                                                                                      | SBifLactt | SBifLacttg               | 20 | 20 | -34.350     | 5.931         | -42.000     | 6.058         | -7.650   | 1.896         |
| Chandra2016(Chandra et al., 2016)       | SRP                                                                  | SRP + Saccharomyces boulardii ( $\geq 5$ billion CFU)                                                                                                                              | SRP       | Ssbou                    | 27 | 28 | -0.870      | 0.087         | -0.940      | 0.083         | -0.070   | 0.023         |
| Costacurta2018(Costacurta et al., 2018) | SRP                                                                  | SRP + Lreuteri ( $1 \times 10^8$ CFU) for DSM17938 and ATCC PTA5289                                                                                                                | SRP       | SLreutDA                 | 20 | 20 | NA          | NA            | NA          | NA            | NA       | NA            |
| deOliveira2022(deOliveira et al., 2022) | SRP + placebo                                                        | SRP + Lactobacillus spp. and 3 of Bifidobacterium spp.                                                                                                                             | Splac     | SLsppBssp                | 23 | 19 | NA          | NA            | NA          | NA            | NA       | NA            |
| Dhaliwal2017(Dhaliwal et al., 2017)     | SRP                                                                  | Sfaecalis T-110 JPC -30 million CFU, Clostridium butyricum TO-A IHS-2 million CFU, Bmesentericus TO-A JPC-1million CFU and Lsporogenes IHS-50 million CFU                          | SRP       | SfaeCbut BmesLspo        | 13 | 14 | -0.400      | 0.118         | -0.390      | 0.105         | 0.010    | 0.043         |
| El-Bagoory2021(El-Bagoory et al., 2021) | SRP                                                                  | SRP + Lreuteri DSM 17938 ( $1 \times 10^8$ CFU)                                                                                                                                    | SRP       | SLreutD                  | 6  | 6  | NA          | NA            | NA          | NA            | NA       | NA            |
| Ghasemi2020(Ghasemi et al., 2020)       | SRP + placebo                                                        | SRP + $15 \times 10^9$ probiotic units per capsule), Blactis, Lacidophilus, Bbifidum, Lrhamnosus                                                                                   | Splac     | SBlacLacidBbifLrh am     | 18 | 18 | -28.610     | 2.542         | -31.170     | 3.148         | -2.560   | 0.954         |
| Grover(Grover)                          | SRP                                                                  | SRP + Bifilac lozenges (Sfaecalis T-110 JPC -30 million CFU, Clostridium butyricum TO-A IHS-2 million CFU, Bmesentericus TO-A JPC-1million CFU and Lsporogenes IHS-50 million CFU) | SRP       | SfaeCbut BmesLspo        | 15 | 15 | -0.400      | 0.110         | -0.390      | 0.102         | 0.010    | 0.039         |
| Ikram2019(Ikram et al., 2019)           | SRP + placebo                                                        | SRP + L. reuteri 1.2 billion CFU/g                                                                                                                                                 | Splac     | Slreut                   | 14 | 14 | -50.910     | 3.324         | -58.950     | 2.460         | -8.040   | 1.105         |

|                                                      |                                                                                                |                                                                                                                                                                                       |              |                      |    |    |         |       |         |       |         |       |
|------------------------------------------------------|------------------------------------------------------------------------------------------------|---------------------------------------------------------------------------------------------------------------------------------------------------------------------------------------|--------------|----------------------|----|----|---------|-------|---------|-------|---------|-------|
| <b>Ince2015(Ince et al., 2015)</b>                   | SRP + placebo                                                                                  | SRP + Lreuteri (1x10 <sup>8</sup> CFU) for DSM17938 and ATCC PTA5289                                                                                                                  | Splac        | SLreutDA             | 15 | 15 | -0.800  | 0.091 | -1.490  | 0.089 | -0.690  | 0.033 |
| <b>Invernici2018(Invernici et al., 2018)</b>         | SRP + placebo                                                                                  | SRP + Bifidobacterium lactis HN019 (1X10 <sup>9</sup> CFU)                                                                                                                            | Splac        | SBlactis             | 21 | 20 | 0.430   | 5.447 | -2.200  | 4.513 | -2.630  | 1.567 |
| <b>Invernici2020(Invernici et al., 2020)</b>         | SRP + placebo                                                                                  | SRP + Bifidobacterium lactis HN019 (1X10 <sup>9</sup> CFU)                                                                                                                            | Splac        | SBlactis             | 15 | 15 | 0.160   | 3.393 | -0.440  | 5.417 | -0.600  | 1.650 |
| <b>Jebin2021(Jebin et al., 2021)</b>                 | SRP                                                                                            | SRP + Lreuteri UBLRu-87 ( 0.5 billion CFU)                                                                                                                                            | SRP          | SLreutU              | 13 | 14 | -0.520  | 0.109 | -0.740  | 0.109 | -0.220  | 0.042 |
| <b>Kanagaraj2019(Kanagaraj et al., 2019)</b>         | SRP + placebo                                                                                  | SRP + Lsporigenes 100 million, Sfaecalis Scientific Name Search PC 60 million, Clostridium butyrium TO-A 4 million, and Bmesentericus TO-A JPC 2 million                              | Splac        | LspoSfaeCbutBmes     | 30 | 30 | NA      | NA    | NA      | NA    | NA      | NA    |
| <b>Kumar2021(Kumar et al., 2021)</b>                 | SRP + placebo                                                                                  | SRP + 5.9 billion CFU) of Lreuteri per gram and maltodextrin as a carrier (single application)                                                                                        | Splac        | SLreutsingle         | 15 | 15 | -1.380  | 0.113 | -1.370  | 0.086 | 0.010   | 0.037 |
| <b>Kumar2021(Kumar et al., 2021)</b>                 | SRP + placebo                                                                                  | SRP + 5.9 billion CFU) of Lreuteri per gram and maltodextrin as a carrier (incremental application)                                                                                   | Splac        | Sltreutincrem        | 15 | 15 | -1.380  | 0.113 | -1.740  | 0.121 | -0.360  | 0.043 |
| <b>Kumar2021(Kumar et al., 2021)</b>                 | SRP + 5.9 billion CFU) of Lreuteri per gram and maltodextrin as a carrier (single application) | SRP + 5.9 billion CFU) of Lreuteri per gram and maltodextrin as a carrier (incremental application)                                                                                   | SLreutsingle | Sltreutincrem        | 15 | 15 | -1.370  | 0.086 | -1.740  | 0.121 | -0.370  | 0.038 |
| <b>Laleman2015(Laleman et al., 2015)</b>             | SRP + placebo                                                                                  | SRP + Soralis KJ3, Suberis KJ2 and Srattus JH145(≥ 10 <sup>8</sup> CFU)                                                                                                               | Splac        | SSoraluberrat        | 24 | 24 | NA      | NA    | NA      | NA    | NA      | NA    |
| <b>Meenakshi2020(Meenakshi &amp; Varghese, 2018)</b> | SRP                                                                                            | SRP + Lcasei (dosage not specified)                                                                                                                                                   | SRP          | SLcas                | 10 | 10 | -0.360  | 0.170 | -1.130  | 0.168 | -0.770  | 0.076 |
| <b>Minic2020(Minic et al., 2022)</b>                 | SRP                                                                                            | SRP + 6.5 billion live L acidophilus, concentration of 107 CFU, at least 107 CFU Binfantis and at least 106 CFU Efaecium colony-forming                                               | SRP          | SRPLacidBinEfae      | 40 | 40 | -1.310  | 0.084 | -1.900  | 0.089 | -0.590  | 0.019 |
| <b>Morales2016(Morales et al., 2016)</b>             | SRP + placebo                                                                                  | SRP + LrhamanosusSP1 (2X10 <sup>7</sup> CFU)                                                                                                                                          | Splac        | SLrham               | 14 | 14 | -16.600 | 6.316 | -30.000 | 7.556 | -13.400 | 2.632 |
| <b>Oliveira2021(Oliveira et al., 2021)</b>           | SRP + placebo                                                                                  | SRP + Lactobacillus spp. and 3 of Bifidobacterium spp.                                                                                                                                | Splac        | SLsppBssp            | 23 | 19 | -17.200 | 4.271 | -13.300 | 5.347 | 3.900   | 1.483 |
| <b>Özener2023(Ozener et al., 2023)</b>               | SRP + placebo                                                                                  | SRP + B. lactis DN-173010, ≥108 CFU                                                                                                                                                   | Splac        | SBlactDN             | 15 | 15 | -1.440  | 0.109 | -1.630  | 0.063 | -0.190  | 0.033 |
| <b>Paul2019(Paul et al., 2019)</b>                   | SRP + placebo                                                                                  | SRP + Lbrevis (dosage not reported)                                                                                                                                                   | Splac        | SLbrevis             | 13 | 14 | -0.534  | 0.241 | -0.638  | 0.189 | -0.104  | 0.083 |
| <b>Pelekos2020(Pelekos et al., 2020)</b>             | SRP + placebo                                                                                  | SRP + Lreuteri (1x10 <sup>8</sup> CFU) for DSM17938 and ATCC PTA5289                                                                                                                  | Splac        | SLreutDA             | 20 | 20 | NA      | NA    | NA      | NA    | NA      | NA    |
| <b>Penala2016(Penala et al., 2016)</b>               | SRP + placebo                                                                                  | SRP + L salivarius (2 × 10 <sup>9</sup> CFU) and Lreuteri (2 × 10 <sup>9</sup> CFU)                                                                                                   | Splac        | LSalreut             | 14 | 15 | NA      | NA    | NA      | NA    | NA      | NA    |
| <b>Pudgar2021(Pudgar et al., 2021)</b>               | SRP + placebo                                                                                  | SRP + Lbrevis (CECT7480) and Lplantarum (CECT7481) (1.2 × 10 <sup>9</sup> CFU/ml of each bacterium)                                                                                   | Splac        | SLbrevisplant        | 20 | 20 | -11.000 | 4.773 | -15.500 | 3.617 | -4.500  | 1.339 |
| <b>Ranjith2021(Ranjith et al., 2022)</b>             | SRP + placebo                                                                                  | SRP + Darolac, Aristo pharmaceuticals, India containing 1 g powder of 1.25 billion freeze-dried combination of a mixture of L. acidophilus, L. rhamnosus, B. longum and S. boulardii. | Splac        | SLacidLrhaBlongSboul | 27 | 28 | -0.510  | 0.168 | -0.610  | 0.165 | -0.100  | 0.045 |

|                                            |               |                                                                      |       |              |    |    |         |       |         |       |         |       |
|--------------------------------------------|---------------|----------------------------------------------------------------------|-------|--------------|----|----|---------|-------|---------|-------|---------|-------|
| <b>Tekce2015(Tekce et al., 2015)</b>       | SRP + placebo | SRP + Lreuteri (1x10 <sup>8</sup> CFU) for DSM17938 and ATCC PTA5289 | Splac | SLreutD<br>A | 20 | 20 | -0.910  | 0.111 | -1.560  | 0.082 | -0.650  | 0.031 |
| <b>Teughels2013(Teughels et al., 2013)</b> | SRP + placebo | SRP + Lreuteri (1x10 <sup>8</sup> CFU) for DSM17938 and ATCC PTA5289 | Splac | SLreutD<br>A | 15 | 15 | -74.780 | 8.591 | -78.660 | 5.620 | -3.880  | 2.651 |
| <b>Theodoro2019(Theodoro et al., 2019)</b> | SRP + placebo | SRP + Lreuteri DSM 17938 (1x10 <sup>8</sup> CFU)                     | Splac | SLreutD      | 14 | 14 | NA      | NA    | NA      | NA    | NA      | NA    |
| <b>Tsubura2009(Tsubura et al., 2009)</b>   | SRP + control | SRP + B subtilis: E-300                                              | Scont | Sbsub        | 27 | 27 | NA      | NA    | NA      | NA    | NA      | NA    |
| <b>Vicario2013(Vicario et al., 2013)</b>   | SRP + placebo | SRP + L reuteri ATCC 55730 and ATCCPTA 5289) (2X10 <sup>8</sup> CFU) | Splac | SLreutA<br>A | 9  | 10 | 4.500   | 9.779 | -17.000 | 7.003 | -21.500 | 3.871 |

CFU: colony forming units; CHX: chlorhexidine; SRP: scaling and root planning.

Table 9 - Summary measures of treatment effect of CFU outcome.

| studlab                               | treat1.long                                                          | treat2.long                                                          | treat1 | treat2                      | n1 | n2 | TE<br>(treat1)                                                                                                                                    | seTE<br>(treat1)                                                                                                                                     | TE<br>(treat2)                                                                                                                                 | seTE<br>(treat2)                                                                                                                                                  | TEglob<br>al                                                                                                                                                | seTE<br>(global)                                                                                                                                                 |
|---------------------------------------|----------------------------------------------------------------------|----------------------------------------------------------------------|--------|-----------------------------|----|----|---------------------------------------------------------------------------------------------------------------------------------------------------|------------------------------------------------------------------------------------------------------------------------------------------------------|------------------------------------------------------------------------------------------------------------------------------------------------|-------------------------------------------------------------------------------------------------------------------------------------------------------------------|-------------------------------------------------------------------------------------------------------------------------------------------------------------|------------------------------------------------------------------------------------------------------------------------------------------------------------------|
| Abuazab2021(Abuazab et al., 2021)     | SRP                                                                  | SRP + Bbifidum, EMCC #: 1334, Designation: DSM 20082, E 319f, JCM 12 | SRP    | Sbbif                       | 10 | 10 | <i>Pg</i><br>-12.000<br><i>Pi</i><br>-13.000<br><i>Total load</i><br>-<br>353.000                                                                 | <i>Pg</i><br>3.265<br><i>Pi</i><br>2.989<br><i>Total load</i><br>69.986                                                                              | <i>Pg</i><br>-23.000<br><i>Pi</i><br>-24.000<br><i>Total load</i><br>-<br>423.500                                                              | <i>Pg</i><br>4.585<br><i>Pi</i><br>3.654<br><i>Total load</i><br>80.146                                                                                           | <i>Pg</i><br>-11.000<br><i>Pi</i><br>-11.000<br><i>Total load</i><br>-70.500                                                                                | <i>Pg</i><br>1.780<br><i>Pi</i><br>1.493<br><i>Total load</i><br>33.647                                                                                          |
| Abuazab2021(Abuazab et al., 2021)     | SRP                                                                  | SRP + CHX                                                            | SRP    | SChx                        | 10 | 10 | <i>Pg</i><br>-12.000<br><i>Pi</i><br>-13.000<br><i>Total load</i><br>-<br>353.000                                                                 | <i>Pg</i><br>3.265<br><i>Pi</i><br>2.989<br><i>Total load</i><br>69.986                                                                              | <i>Pg</i><br>-19.000<br><i>Pi</i><br>-21.000<br><i>Total load</i><br>-<br>303.000                                                              | <i>Pg</i><br>5.576<br><i>Pi</i><br>5.932<br><i>Total load</i><br>81.644                                                                                           | <i>Pg</i><br>-7.000<br><i>Pi</i><br>-8.000<br><i>Total load</i><br>50.000                                                                                   | <i>Pg</i><br>2.043<br><i>Pi</i><br>2.101<br><i>Total load</i><br>34.006                                                                                          |
| Abuazab2021(Abuazab et al., 2021)     | SRP + Bbifidum, EMCC #: 1334, Designation: DSM 20082, E 319f, JCM 12 | SRP + CHX                                                            | Sbbif  | SChx                        | 10 | 10 | <i>Pg</i><br>-23.000<br><i>Pi</i><br>-24.000<br><i>Total load</i><br>-<br>423.500                                                                 | <i>Pg</i><br>4.585<br><i>Pi</i><br>3.654<br><i>Total load</i><br>80.146                                                                              | <i>Pg</i><br>-19.000<br><i>Pi</i><br>-21.000<br><i>Total load</i><br>-<br>303.000                                                              | <i>Pg</i><br>5.576<br><i>Pi</i><br>5.932<br><i>Total load</i><br>81.644                                                                                           | <i>Pg</i><br>4.000<br><i>Pi</i><br>3.000<br><i>Total load</i><br>120.500                                                                                    | <i>Pg</i><br>2.283<br><i>Pi</i><br>2.203<br><i>Total load</i><br>36.179                                                                                          |
| Alshareef2020(Alshareef et al., 2020) | SRP                                                                  | SRP + Lacidophilus, Lcasei, Bbifidum, Lrhamnosus, and Lsalivarius    | SRP    | SLacidLcasBbifLrh<br>amLsal | 10 | 15 | NA                                                                                                                                                | NA                                                                                                                                                   | NA                                                                                                                                             | NA                                                                                                                                                                | NA                                                                                                                                                          | NA                                                                                                                                                               |
| Butera2020(Butera et al., 2020)       | SRP + CHX toothpaste                                                 | SRP + Bifidobacterium, Lactobacillus (toothpaste)                    | SChx   | SBifLactt                   | 20 | 20 | <i>Aa</i><br>-<br>217.400<br><i>Pg</i><br>-<br>2051.55<br>0<br><i>Tf</i><br>6977.49<br>0<br><i>Td</i><br>-<br>2688.82<br>0<br><i>Pi</i><br>-<br>0 | <i>Aa</i><br>385.986<br><i>Pg</i><br>4214.58<br>8<br><i>Tf</i><br>12899.6<br>60<br>4480.98<br>6<br><i>Pi</i><br>2605.43<br>1<br><i>Fn</i><br>6850.22 | <i>Aa</i><br>206.500<br><i>Pg</i><br>-<br>1481.90<br>0<br><i>Tf</i><br>32034.0<br>00<br><i>Td</i><br>4926.63<br>0<br><i>Pi</i><br>-<br>6184.10 | <i>Aa</i><br>527.624<br><i>Pg</i><br>7052.55<br>6<br><i>Tf</i><br>23012.0<br>70<br><i>Td</i><br>4202.88<br>3<br><i>Pi</i><br>1431.30<br>2<br><i>Fn</i><br>2623.84 | <i>Aa</i><br>423.900<br><i>Pg</i><br>569.650<br><i>Tf</i><br>-<br>39011.4<br>90<br><i>Td</i><br>7615.45<br>0<br><i>Pi</i><br>-<br>3996.10<br>0<br><i>Fn</i> | <i>Aa</i><br>146.180<br><i>Pg</i><br>1837.13<br>5<br><i>Tf</i><br>5898.96<br>9<br><i>Td</i><br>1373.74<br>4<br><i>Pi</i><br>664.714<br><i>Fn</i><br>1640.27<br>7 |



|                                        |                                                   |                                                               |            |            |    |    |                                                                                                                                                                                                                                        |                                                                                                                                                                                                         |                                                                                                                                                                                                                      |                                                                                                                                                                                                           |                                                                                                                                                                                                                        |                                                                                                                                                                                                         |
|----------------------------------------|---------------------------------------------------|---------------------------------------------------------------|------------|------------|----|----|----------------------------------------------------------------------------------------------------------------------------------------------------------------------------------------------------------------------------------------|---------------------------------------------------------------------------------------------------------------------------------------------------------------------------------------------------------|----------------------------------------------------------------------------------------------------------------------------------------------------------------------------------------------------------------------|-----------------------------------------------------------------------------------------------------------------------------------------------------------------------------------------------------------|------------------------------------------------------------------------------------------------------------------------------------------------------------------------------------------------------------------------|---------------------------------------------------------------------------------------------------------------------------------------------------------------------------------------------------------|
|                                        |                                                   |                                                               |            |            |    |    | 2188.00<br>0<br><b>Fn</b><br>-<br>1308.48<br>0<br><b>Total</b><br>-<br>1087500<br>.000                                                                                                                                                 | 7<br><b>Total</b><br>580221.<br>837                                                                                                                                                                     | 0<br><b>Fn</b><br>-<br>11537.6<br>00<br><b>Total</b><br>-<br>615195.<br>000                                                                                                                                          | 3<br><b>Total</b><br>512217.<br>926                                                                                                                                                                       | -<br>10229.1<br>20<br><b>Total</b><br>472305.<br>000                                                                                                                                                                   | <b>Total</b><br>173064.<br>234                                                                                                                                                                          |
| <b>Butera2020(Butera et al., 2020)</b> | SRP + CHX toothpaste                              | SRP + Bifidobacterium, Lactobacillus (toothpaste+chewing gum) | SChx       | SBifLacttg | 20 | 20 | <b>Aa</b><br>-<br>217.400<br><b>Pg</b><br>-<br>2051.55<br>0<br><b>Tf</b><br>6977.49<br>0<br><b>Td</b><br>-<br>2688.82<br>0<br><b>Pi</b><br>-<br>2188.00<br>0<br><b>Fn</b><br>-<br>1308.48<br>0<br><b>Total</b><br>-<br>1087500<br>.000 | <b>Aa</b><br>385.986<br><b>Pg</b><br>4214.58<br>8<br><b>Tf</b><br>12899.6<br>0<br><b>Td</b><br>4480.98<br>6<br><b>Pi</b><br>2605.43<br>1<br><b>Fn</b><br>6850.22<br>7<br><b>Total</b><br>580221.<br>837 | <b>Aa</b><br>-<br>244.050<br><b>Pg</b><br>11644<br>2<br><b>Tf</b><br>3893988<br>.100<br><b>Td</b><br>543.380<br><b>Pi</b><br>-<br>4956.05<br>0<br><b>Fn</b><br>-<br>10841.2<br>20<br><b>Total</b><br>1289616<br>.000 | <b>Aa</b><br>323.070<br><b>Pg</b><br>6293.79<br>2<br><b>Tf</b><br>17469.0<br>62<br><b>Td</b><br>6083.09<br>4<br><b>Pi</b><br>1201.18<br>0<br><b>Fn</b><br>2785.31<br>0<br><b>Total</b><br>1315478<br>.847 | <b>Aa</b><br>-26.650<br><b>Pg</b><br>13695.5<br>50<br><b>Tf</b><br>3887010<br>.610<br><b>Td</b><br>3232.20<br>0<br><b>Pi</b><br>-<br>2768.05<br>0<br><b>Fn</b><br>-<br>9532.74<br>0<br><b>Total</b><br>2377116<br>.000 | <b>Aa</b><br>112.552<br><b>Pg</b><br>1693.73<br>2<br><b>Tf</b><br>4855.76<br>6<br><b>Td</b><br>1689.42<br>7<br><b>Pi</b><br>641.526<br>0<br><b>Fn</b><br>1653.53<br>5<br><b>Total</b><br>321491.<br>989 |
| <b>Butera2020(Butera et al., 2020)</b> | SRP + Bifidobacterium, Lactobacillus (toothpaste) | SRP + Bifidobacterium, Lactobacillus (toothpaste+chewing gum) | SBifLacttg | SBifLacttg | 20 | 20 | <b>Aa</b><br>206.500<br><b>Pg</b><br>-<br>1481.90<br>0<br><b>Tf</b><br>-<br>32034.0<br>00<br><b>Td</b><br>4926.63<br>0<br><b>Pi</b>                                                                                                    | <b>Aa</b><br>527.624<br><b>Pg</b><br>7052.55<br>6<br><b>Tf</b><br>23012.0<br>70<br><b>Td</b><br>4202.88<br>3<br><b>Pi</b><br>1431.30<br>2                                                               | <b>Aa</b><br>-<br>244.050<br><b>Pg</b><br>11644<br>2<br><b>Tf</b><br>3893988<br>.100<br><b>Td</b><br>543.380<br><b>Pi</b><br>-<br>4956.05<br>0                                                                       | <b>Aa</b><br>323.070<br><b>Pg</b><br>6293.79<br>2<br><b>Tf</b><br>17469.0<br>62<br><b>Td</b><br>6083.09<br>4<br><b>Pi</b><br>1201.18<br>0                                                                 | <b>Aa</b><br>-<br>450.550<br><b>Pg</b><br>13125.9<br>00<br><b>Tf</b><br>3926022<br>.100<br><b>Td</b><br>-<br>4383.25<br>0<br><b>Pi</b>                                                                                 | <b>Aa</b><br>138.340<br><b>Pg</b><br>2113.65<br>0<br><b>Tf</b><br>6460.35<br>4<br><b>Td</b><br>1653.30<br>4<br><b>Pi</b><br>417.819<br><b>Fn</b>                                                        |

|                                                |               |                                                                                                                                                                                    |       |                     |    |    |                                                                                             |                                                                 |                                                                                          |                                                                                          |                                                                                          |                                                                                          |
|------------------------------------------------|---------------|------------------------------------------------------------------------------------------------------------------------------------------------------------------------------------|-------|---------------------|----|----|---------------------------------------------------------------------------------------------|-----------------------------------------------------------------|------------------------------------------------------------------------------------------|------------------------------------------------------------------------------------------|------------------------------------------------------------------------------------------|------------------------------------------------------------------------------------------|
|                                                |               |                                                                                                                                                                                    |       |                     |    |    | -<br>6184.10<br>0<br><b>Fn</b><br>-<br>11537.6<br>00<br><b>Total</b><br>-<br>615195.<br>000 | <b>Fn</b><br>2623.84<br>3<br><b>Total</b><br>512217.<br>926     | <b>Fn</b><br>-<br>10841.2<br>20<br><b>Total</b><br>1289616<br>.000                       | <b>Fn</b><br>2785.31<br>0<br><b>Total</b><br>1315478<br>.847                             | 1228.05<br>0<br><b>Fn</b><br>696.380<br><b>Total</b><br>1904811<br>.000                  | 855.643<br><b>Total</b><br>315662.<br>145                                                |
| <b>Chandra2016(Chandra et al., 2016)</b>       | SRP           | SRP + Saccharomyces boulardii (≥ 5 billion CFU)                                                                                                                                    | SRP   | Ssbou               | 27 | 28 | NA                                                                                          | NA                                                              | NA                                                                                       | NA                                                                                       | NA                                                                                       | NA                                                                                       |
| <b>Costacurta2018(Costacurta et al., 2018)</b> | SRP           | SRP + Lreuteri (1x10 <sup>8</sup> CFU) for DSM17938 and ATCC PTA5289                                                                                                               | SRP   | SLreutDA            | 20 | 20 | NA                                                                                          | NA                                                              | NA                                                                                       | NA                                                                                       | NA                                                                                       | NA                                                                                       |
| <b>deOliveira2022(deOliveira et al., 2022)</b> | SRP + placebo | SRP + Lactobacillus spp. and 3 of Bifidobacterium spp.                                                                                                                             | Splac | SLsppBspP           | 23 | 19 | NA                                                                                          | NA                                                              | NA                                                                                       | NA                                                                                       | NA                                                                                       | NA                                                                                       |
| <b>Dhaliwal2017(Dhaliwal et al., 2017)</b>     | SRP           | Sfaecalis T-110 JPC -30 million CFU, Clostridium butyricum TO-A IHS-2 million CFU, Bmesentericus TO-A JPC-1million CFU and Lsporogenes IHS-50 million CFU                          | SRP   | SfaeCbutBmesLspO    | 13 | 14 | <b>Aa</b><br>0.500<br><b>Pg</b><br>-13.930<br><b>Pi</b><br>1.860                            | <b>Aa</b><br>8.030<br><b>Pg</b><br>10.419<br><b>Pi</b><br>2.291 | <b>Aa</b><br>not applicab<br>le<br><b>Pg</b><br>not applicab<br>le<br><b>Pi</b><br>5.690 | <b>Aa</b><br>not applicab<br>le<br><b>Pg</b><br>not applicab<br>le<br><b>Pi</b><br>5.690 | <b>Aa</b><br>not applicab<br>le<br><b>Pg</b><br>not applicab<br>le<br><b>Pi</b><br>3.830 | <b>Aa</b><br>not applicab<br>le<br><b>Pg</b><br>not applicab<br>le<br><b>Pi</b><br>2.187 |
| <b>El-Bagoory2021(El-Bagoory et al., 2021)</b> | SRP           | SRP + Lreuteri DSM 17938 (1×10 <sup>8</sup> CFU)                                                                                                                                   | SRP   | SLreutD             | 6  | 6  | 5.090                                                                                       | 2.496                                                           | -10.070                                                                                  | 1.424                                                                                    | -15.160                                                                                  | 1.173                                                                                    |
| <b>Ghasemi2020(Ghasemi et al., 2020)</b>       | SRP + placebo | SRP + 15×10 <sup>9</sup> probiotic units per capsule), Blactis, Lacidophilus, Bbifidum, Lrhamnosus                                                                                 | Splac | SBlacLacidBbifLrham | 18 | 18 | NA                                                                                          | NA                                                              | NA                                                                                       | NA                                                                                       | NA                                                                                       | NA                                                                                       |
| <b>Grover(Grover)</b>                          | SRP           | SRP + Bifilac lozenges (Sfaecalis T-110 JPC -30 million CFU, Clostridium butyricum TO-A IHS-2 million CFU, Bmesentericus TO-A JPC-1million CFU and Lsporogenes IHS-50 million CFU) | SRP   | SfaeCbutBmesLspO    | 15 | 15 | <b>Aa</b><br>0.500<br><b>Pg</b><br>-13.930<br><b>Pi</b><br>1.860                            | <b>Aa</b><br>7.476<br><b>Pg</b><br>9.700<br><b>Pi</b><br>2.133  | <b>Aa</b><br>not applicab<br>le<br><b>Pg</b><br>not applicab<br>le<br><b>Pi</b><br>5.690 | <b>Aa</b><br>not applicab<br>le<br><b>Pg</b><br>not applicab<br>le<br><b>Pi</b><br>7.304 | <b>Aa</b><br>not applicab<br>le<br><b>Pg</b><br>not applicab<br>le<br><b>Pi</b><br>3.830 | <b>Aa</b><br>not applicab<br>le<br><b>Pg</b><br>not applicab<br>le<br><b>Pi</b><br>1.965 |
| <b>Ikram2019(Ikram et al., 2019)</b>           | SRP + placebo | SRP + L. reuteri 1.2 billion CFU/g                                                                                                                                                 | Splac | Slreut              | 14 | 14 | NA                                                                                          | NA                                                              | NA                                                                                       | NA                                                                                       | NA                                                                                       | NA                                                                                       |
| <b>Ince2015(Ince et al., 2015)</b>             | SRP + placebo | SRP + Lreuteri (1x10 <sup>8</sup> CFU) for DSM17938 and ATCC PTA5289                                                                                                               | Splac | SLreutDA            | 15 | 15 | NA                                                                                          | NA                                                              | NA                                                                                       | NA                                                                                       | NA                                                                                       | NA                                                                                       |

|                                                      |                                                                                                |                                                                                                                                                          |              |                      |    |    |                                                                                  |                                                                                  |                                                                               |                                                                            |                                                                                  |                                                                                  |
|------------------------------------------------------|------------------------------------------------------------------------------------------------|----------------------------------------------------------------------------------------------------------------------------------------------------------|--------------|----------------------|----|----|----------------------------------------------------------------------------------|----------------------------------------------------------------------------------|-------------------------------------------------------------------------------|----------------------------------------------------------------------------|----------------------------------------------------------------------------------|----------------------------------------------------------------------------------|
| <b>Invernici2018(Invernici et al., 2018)</b>         | SRP + placebo                                                                                  | SRP + Bifidobacterium lactis HN019 (1X10 <sup>9</sup> CFU)                                                                                               | Splac        | SBlactis             | 21 | 20 | NA                                                                               | NA                                                                               | NA                                                                            | NA                                                                         | NA                                                                               | NA                                                                               |
| <b>Invernici2020(Invernici et al., 2020)</b>         | SRP + placebo                                                                                  | SRP + Bifidobacterium lactis HN019 (1X10 <sup>9</sup> CFU)                                                                                               | Splac        | SBlactis             | 15 | 15 | NA                                                                               | NA                                                                               | NA                                                                            | NA                                                                         | NA                                                                               | NA                                                                               |
| <b>Jebin2021(Jebin et al., 2021)</b>                 | SRP                                                                                            | SRP + Lreuteri UBLRu-87 ( 0.5 billion CFU)                                                                                                               | SRP          | SLreutU              | 13 | 14 | -1.890                                                                           | 0.224                                                                            | -2.660                                                                        | 0.190                                                                      | -0.770                                                                           | 0.080                                                                            |
| <b>Kanagaraj2019(Kanagaraj et al., 2019)</b>         | SRP + placebo                                                                                  | SRP + Lsporigenes 100 million, Sfaecalis Scientific Name Search PC 60 million, Clostridium butyrium TO-A 4 million, and Bmesentericus TO-A JPC 2 million | Splac        | LspoSfae<br>CbutBmes | 30 | 30 | NA                                                                               | NA                                                                               | NA                                                                            | NA                                                                         | NA                                                                               | NA                                                                               |
| <b>Kumar2021(Kumar et al., 2021)</b>                 | SRP + placebo                                                                                  | SRP + 5.9 billion CFU) of Lreuteri per gram and maltodextrin as a carrier (single application)                                                           | Splac        | SLreutsingle         | 15 | 15 | NA                                                                               | NA                                                                               | NA                                                                            | NA                                                                         | NA                                                                               | NA                                                                               |
| <b>Kumar2021(Kumar et al., 2021)</b>                 | SRP + placebo                                                                                  | SRP + 5.9 billion CFU) of Lreuteri per gram and maltodextrin as a carrier (incremental application)                                                      | Splac        | Sltreutincrem        | 15 | 15 | NA                                                                               | NA                                                                               | NA                                                                            | NA                                                                         | NA                                                                               | NA                                                                               |
| <b>Kumar2021(Kumar et al., 2021)</b>                 | SRP + 5.9 billion CFU) of Lreuteri per gram and maltodextrin as a carrier (single application) | SRP + 5.9 billion CFU) of Lreuteri per gram and maltodextrin as a carrier (incremental application)                                                      | SLreutsingle | Sltreutincrem        | 15 | 15 | NA                                                                               | NA                                                                               | NA                                                                            | NA                                                                         | NA                                                                               | NA                                                                               |
| <b>Laleman2015(Laleman et al., 2015)</b>             | SRP + placebo                                                                                  | SRP + Soralis KJ3, Suberis KJ2 and Srattus JH145(≥ 10 <sup>8</sup> CFU)                                                                                  | Splac        | SSoraluberrrat       | 24 | 24 | NA                                                                               | NA                                                                               | NA                                                                            | NA                                                                         | NA                                                                               | NA                                                                               |
| <b>Meenakshi2020(Meenakshi &amp; Varghese, 2018)</b> | SRP                                                                                            | SRP + Lcasei (dosage not specified)                                                                                                                      | SRP          | SLcas                | 10 | 10 | -41.400                                                                          | 14.939                                                                           | -70.500                                                                       | 12.110                                                                     | -29.100                                                                          | 6.081                                                                            |
| <b>Minic2020(Minic et al., 2022)</b>                 | SRP                                                                                            | SRP + 6.5 billion live L acidophilus, concentration of 107 CFU, at least 107 CFU Binfantis and at least 106 CFU Efaecium colony-forming                  | SRP          | SRPLacid<br>BinfEfae | 40 | 40 | NA                                                                               | NA                                                                               | NA                                                                            | NA                                                                         | NA                                                                               | NA                                                                               |
| <b>Morales2016(Morales et al., 2016)</b>             | SRP + placebo                                                                                  | SRP + LrhamanosusSP1 (2X10 <sup>7</sup> CFU)                                                                                                             | Splac        | SLrham               | 14 | 14 | NA                                                                               | NA                                                                               | NA                                                                            | NA                                                                         | NA                                                                               | NA                                                                               |
| <b>Oliveira2021(Oliveira et al., 2021)</b>           | SRP + placebo                                                                                  | SRP + Lactobacillus spp. and 3 of Bifidobacterium spp.                                                                                                   | Splac        | SLsppBssp            | 23 | 19 | NA                                                                               | NA                                                                               | NA                                                                            | NA                                                                         | NA                                                                               | NA                                                                               |
| <b>Özener2023(Ozener et al., 2023)</b>               | SRP + placebo                                                                                  | SRP + B. lactis DN-173010, ≥108 CFU                                                                                                                      | Splac        | SBlactDN             | 15 | 15 | -50.740                                                                          | 13.232                                                                           | -62.000                                                                       | 22.171                                                                     | -11.260                                                                          | 6.667                                                                            |
| <b>Paul2019(Paul et al., 2019)</b>                   | SRP + placebo                                                                                  | SRP + Lbrevis (dosage not reported)                                                                                                                      | Splac        | Slbrevis             | 13 | 14 | <b>Aa</b> not applicable<br><b>Pg</b> not applicable<br><b>Pi</b> not applicable | <b>Aa</b> not applicable<br><b>Pg</b> not applicable<br><b>Pi</b> not applicable | <b>Aa</b> not applicable<br><b>Pg</b> - 17862.000<br><b>Pi</b> not applicable | <b>Aa</b> not applicable<br><b>Pg</b> 6153.411<br><b>Pi</b> not applicable | <b>Aa</b> not applicable<br><b>Pg</b> not applicable<br><b>Pi</b> not applicable | <b>Aa</b> not applicable<br><b>Pg</b> not applicable<br><b>Pi</b> not applicable |
| <b>Pelekos2020(Pelekos et al., 2020)</b>             | SRP + placebo                                                                                  | SRP + Lreuteri (1x10 <sup>8</sup> CFU) for DSM17938 and ATCC PTA5289                                                                                     | Splac        | SLreutDA             | 20 | 20 | NA                                                                               | NA                                                                               | NA                                                                            | NA                                                                         | NA                                                                               | NA                                                                               |
| <b>Penala2016(Penala et al., 2016)</b>               | SRP + placebo                                                                                  | SRP + L salivarius (2 × 10 <sup>9</sup> CFU) and Lreuteri (2 × 10 <sup>9</sup> CFU)                                                                      | Splac        | LSalreut             | 14 | 15 | NA                                                                               | NA                                                                               | NA                                                                            | NA                                                                         | NA                                                                               | NA                                                                               |

|                                            |               |                                                                                                                                                                                       |       |                      |    |    |                                                                                                                                                |                                                                                                                                          |                                                                                                                                                |                                                                                                                                                 |                                                                                                                                                      |                                                                                                                                          |
|--------------------------------------------|---------------|---------------------------------------------------------------------------------------------------------------------------------------------------------------------------------------|-------|----------------------|----|----|------------------------------------------------------------------------------------------------------------------------------------------------|------------------------------------------------------------------------------------------------------------------------------------------|------------------------------------------------------------------------------------------------------------------------------------------------|-------------------------------------------------------------------------------------------------------------------------------------------------|------------------------------------------------------------------------------------------------------------------------------------------------------|------------------------------------------------------------------------------------------------------------------------------------------|
| <b>Pudgar2021(Pudgar et al., 2021)</b>     | SRP + placebo | SRP + Lbrevis (CECT7480) and Lplantarum (CECT7481) (1.2 × 10 <sup>9</sup> CFU/ml of each bacterium)                                                                                   | Splac | SLbrevisplant        | 20 | 20 | NA                                                                                                                                             | NA                                                                                                                                       | NA                                                                                                                                             | NA                                                                                                                                              | NA                                                                                                                                                   | NA                                                                                                                                       |
| <b>Ranjith2021(Ranjith et al., 2022)</b>   | SRP + placebo | SRP + Darolac, Aristo pharmaceuticals, India containing 1 g powder of 1.25 billion freeze-dried combination of a mixture of L. acidophilus, L. rhamnosus, B. longum and S. boulardii. | Splac | SLacidLrhaBlongSboul | 27 | 28 | NA                                                                                                                                             | NA                                                                                                                                       | NA                                                                                                                                             | NA                                                                                                                                              | NA                                                                                                                                                   | NA                                                                                                                                       |
| <b>Tekce2015(Tekce et al., 2015)</b>       | SRP + placebo | SRP + Lreuteri (1x10 <sup>8</sup> CFU) for DSM17938 and ATCC PTA5289                                                                                                                  | Splac | SLreutDA             | 20 | 20 | -1.000                                                                                                                                         | 15.578                                                                                                                                   | -0.300                                                                                                                                         | 3.981                                                                                                                                           | 0.700                                                                                                                                                | 3.595                                                                                                                                    |
| <b>Teughels2013(Teughels et al., 2013)</b> | SRP + placebo | SRP + Lreuteri (1x10 <sup>8</sup> CFU) for DSM17938 and ATCC PTA5289                                                                                                                  | Splac | SLreutDA             | 15 | 15 | <b>Aa</b><br>-1.710<br><b>Fn</b><br>-1.530<br><b>Pg</b><br>-0.940<br><b>Pi</b><br>-1.360<br><b>Tf</b><br>-1.320<br><b>Total load</b><br>-1.120 | <b>Aa</b><br>0.747<br><b>Fn</b><br>0.409<br><b>Pg</b><br>0.626<br><b>Pi</b><br>0.945<br><b>Tf</b><br>0.380<br><b>Total load</b><br>0.339 | <b>Aa</b><br>-1.860<br><b>Fn</b><br>-2.250<br><b>Pg</b><br>-1.800<br><b>Pi</b><br>-2.120<br><b>Tf</b><br>-0.990<br><b>Total load</b><br>-1.410 | <b>Aa</b><br><b>0.929</b><br><b>Fn</b><br>0.602<br><b>Pg</b><br>0.498<br><b>Pi</b><br>0.769<br><b>Tf</b><br>0.657<br><b>Total load</b><br>0.251 | <b>Aa</b><br>-3.570<br><b>Fn</b><br>-0.720<br><b>Pg</b><br>-0.860<br><b>Pi</b><br><b>-0.760</b><br><b>Tf</b><br>0.330<br><b>Total load</b><br>-0.290 | <b>Aa</b><br>0.308<br><b>Fn</b><br>0.188<br><b>Pg</b><br>0.207<br><b>Pi</b><br>0.315<br><b>Tf</b><br>0.196<br><b>Total load</b><br>0.109 |
| <b>Theodoro2019(Theodoro et al., 2019)</b> | SRP + placebo | SRP + Lreuteri DSM 17938 (1×10 <sup>8</sup> CFU)                                                                                                                                      | Splac | SLreutD              | 14 | 14 | NA                                                                                                                                             | NA                                                                                                                                       | NA                                                                                                                                             | NA                                                                                                                                              | NA                                                                                                                                                   | NA                                                                                                                                       |
| <b>Tsubura2009(Tsubura et al., 2009)</b>   | SRP + control | SRP + B subtilis: E-300                                                                                                                                                               | Scont | Sbsub                | 27 | 27 | NA                                                                                                                                             | NA                                                                                                                                       | NA                                                                                                                                             | NA                                                                                                                                              | NA                                                                                                                                                   | NA                                                                                                                                       |
| <b>Vicario2013(Vicario et al., 2013)</b>   | SRP + placebo | SRP + L reuteri ATCC 55730 and ATCCPTA 5289) (2X10 <sup>8</sup> CFU)                                                                                                                  | Splac | SLreutAA             | 9  | 10 | NA                                                                                                                                             | NA                                                                                                                                       | NA                                                                                                                                             | NA                                                                                                                                              | NA                                                                                                                                                   | NA                                                                                                                                       |

Aa: *Aggregatibacter actinomycetemcomitans*; CFU: colony forming units; CHX: chlorhexidine; Fn: *Fusobacterium nucleatum*; Pg: *Porphyromonas gingivalis*; Pi: *Prevotella intermedia*; SRP: scaling and root planning; Tn: *Tannerella forsythia*; Td: *Treponema denticola*.

## Appendix 6: Risk of bias across studies, publication bias and evaluation of the confidence in the results of the network meta-analysis using the CINeMA framework

Table 10 - CINeMA for the primary outcome “PPD”

| COMPARISON                          | NUMBER OF STUDIES | WITHIN-STUDY BIAS | REPORTING BIAS | INDIRECTNESS  | IMPRECISION    | HETEROGENEITY | INCOHERENCE    | CONFIDENCE RATING | REASON(S) FOR DOWNGRADING                                  |
|-------------------------------------|-------------------|-------------------|----------------|---------------|----------------|---------------|----------------|-------------------|------------------------------------------------------------|
| <b>MIXED EVIDENCE</b>               |                   |                   |                |               |                |               |                |                   |                                                            |
| Lsposfaecbutbmes:Splac              | 1                 | Some concerns     | Low risk       | No concerns   | No concerns    | Some concerns | Major concerns | very low          | Study limitations, Heterogeneity, Serious Incoherence      |
| <b>SBLACLACIDBBIFLRHAM :SPLAC</b>   | 1                 | No concerns       | Low risk       | No concerns   | Some concerns  | Some concerns | Major concerns | very low          | Imprecision, Heterogeneity, Serious Incoherence            |
| <b>SBLACTDN:SPLAC</b>               | 1                 | No concerns       | Low risk       | No concerns   | Major concerns | No concerns   | Major concerns | very low          | Serious Imprecision and Incoherence                        |
| <b>SBLACTIS:SPLAC</b>               | 1                 | No concerns       | Low risk       | No concerns   | Some concerns  | Some concerns | Major concerns | very low          | Imprecision, Heterogeneity, Serious Incoherence            |
| <b>SCHX:SRP</b>                     | 2                 | Major concerns    | Low risk       | Some concerns | Some concerns  | Some concerns | Major concerns | very low          | Study limitations and Serious Incoherence                  |
| <b>SBBIF:SCHX</b>                   | 1                 | Some concerns     | Low risk       | No concerns   | Major concerns | No concerns   | Some concerns  | very low          | Study limitations, Major imprecision and Incoherence       |
| <b>SLACIDLCASBBIFLRHAM LSAL:SRP</b> | 1                 | Some concerns     | Low risk       | Some concerns | Major concerns | No concerns   | Major concerns | very low          | Serious Imprecision and Incoherence                        |
| <b>SLACIDLRHABLONGBOUL:SPLAC</b>    | 1                 | No concerns       | Low risk       | No concerns   | Some concerns  | Some concerns | Major concerns | very low          | Imprecision, Heterogeneity, Serious Incoherence            |
| <b>SLBREVISEPLANT:SPLAC</b>         | 1                 | No concerns       | Low risk       | Some concerns | Major concerns | No concerns   | Major concerns | very low          | Serious Imprecision and Incoherence                        |
| <b>SLCAS:SRP</b>                    | 1                 | Some concerns     | Some concerns  | No concerns   | No concerns    | Some concerns | Major concerns | very low          | Study limitations, heterogeneity, Serious Incoherence      |
| <b>SLREUTD:SRP</b>                  | 2                 | Some concerns     | Low risk       | No concerns   | Some concerns  | Some concerns | Some concerns  | very low          | Study limitations, Imprecision, Heterogeneity, Incoherence |

|                                   |   |                |               |               |                |               |                |          |                                                                    |
|-----------------------------------|---|----------------|---------------|---------------|----------------|---------------|----------------|----------|--------------------------------------------------------------------|
| <b>SLREUTD:SPLAC</b>              | 1 | No concerns    | Low risk      | No concerns   | No concerns    | Some concerns | Some concerns  | low      | Heterogeneity and Incoherence                                      |
| <b>SLREUTDA:SRP</b>               | 1 | Some concerns  | Low risk      | Some concerns | Some concerns  | Some concerns | No concerns    | very low | Study limitations, Imprecision, Heterogeneity                      |
| <b>SLREUTDA:SPLAC</b>             | 5 | No concerns    | Some concerns | No concerns   | No concerns    | Some concerns | No concerns    | low      | Heterogeneity                                                      |
| <b>SLREUTU:SRP</b>                | 1 | Some concerns  | Low risk      | No concerns   | No concerns    | No concerns   | Major concerns | very low | Study limitations, Serious Incoherence                             |
| <b>SLREUTINCREM:SLREUT SINGLE</b> | 1 | No concerns    | Low risk      | No concerns   | Major concerns | No concerns   | Major concerns | very low | Serious Imprecision and Incoherence                                |
| <b>SLREUTSINGLE:SPLAC</b>         | 1 | No concerns    | Low risk      | No concerns   | Major concerns | No concerns   | Major concerns | very low | Serious Imprecision and Incoherence                                |
| <b>SLRHAM:SPLAC</b>               | 3 | No concerns    | Low risk      | Some concerns | Some concerns  | Some concerns | Major concerns | very low | Imprecision, Heterogeneity, Serious Incoherence                    |
| <b>SLSPPBSP:SPLAC</b>             | 2 | No concerns    | Some concerns | No concerns   | Some concerns  | Some concerns | Major concerns | very low | Imprecision, Heterogeneity, Serious Incoherence                    |
| <b>SRP:SRPLACIDBINFEFAE</b>       | 1 | Major concerns | Low risk      | Some concerns | Some concerns  | No concerns   | Major concerns | very low | Study limitations and Serious Incoherence                          |
| <b>SBBIF:SRP</b>                  | 1 | Some concerns  | Low risk      | No concerns   | Major concerns | No concerns   | Some concerns  | very low | Study limitations, Major imprecision, Incoherence                  |
| <b>SFAECBUTBMESLSPO:SRP</b>       | 2 | Some concerns  | Some concerns | Some concerns | Some concerns  | Some concerns | Major concerns | very low | Study limitations, Imprecision, Heterogeneity, serious Incoherence |
| <b>SRP:SSBOU</b>                  | 1 | No concerns    | Low risk      | No concerns   | No concerns    | No concerns   | Major concerns | low      | Serious Incoherence                                                |
| <b>SPLAC:SSORALUBERRAT</b>        | 1 | No concerns    | Low risk      | Some concerns | Major concerns | No concerns   | Major concerns | very low | Serious Imprecision and Incoherence                                |
| <b>SLBREVIS:SPLAC</b>             | 1 | No concerns    | Low risk      | No concerns   | Major concerns | No concerns   | Major concerns | very low | Serious Imprecision and Incoherence                                |
| <b>SLREUT:SPLAC</b>               | 1 | No concerns    | Some concerns | No concerns   | No concerns    | Some concerns | Major concerns | very low | Study limitations, Heterogeneity, Serious Incoherence              |
| <b>SLREUTINCREM:SPLAC</b>         | 1 | No concerns    | Low risk      | No concerns   | Major concerns | No concerns   | Major concerns | very low | Serious Imprecision and Incoherence                                |

**INDIRECT EVIDENCE**

|                                                           |   |               |          |               |                |               |                |          |                                                 |
|-----------------------------------------------------------|---|---------------|----------|---------------|----------------|---------------|----------------|----------|-------------------------------------------------|
| <b>LSPOSFAECBUTBMES:SB<br/>LACLACIDBBIFLRHAM</b>          | 0 | Some concerns | Low risk | No concerns   | Major concerns | No concerns   | Major concerns | very low | Serious Imprecision and Incoherence             |
| <b>LSPOSFAECBUTBMES:SB<br/>LACTDN</b>                     | 0 | Some concerns | Low risk | No concerns   | Some concerns  | Some concerns | Major concerns | very low | Imprecision, Heterogeneity, Serious Incoherence |
| <b>LSPOSFAECBUTBMES:SB<br/>LACTIS</b>                     | 0 | Some concerns | Low risk | No concerns   | Some concerns  | Some concerns | Major concerns | very low | Imprecision, Heterogeneity, Serious Incoherence |
| <b>LSPOSFAECBUTBMES:SC<br/>HX</b>                         | 0 | Some concerns | Low risk | No concerns   | Major concerns | No concerns   | Major concerns | very low | Serious Imprecision and Incoherence             |
| <b>LSPOSFAECBUTBMES:SL<br/>ACIDLCASBBIFLRHAMLS<br/>AL</b> | 0 | Some concerns | Low risk | No concerns   | Major concerns | No concerns   | Major concerns | very low | Serious Imprecision and Incoherence             |
| <b>LSPOSFAECBUTBMES:SL<br/>ACIDLRHABLONGSBOUL</b>         | 0 | Some concerns | Low risk | No concerns   | Major concerns | No concerns   | Major concerns | very low | Serious Imprecision and Incoherence             |
| <b>LSPOSFAECBUTBMES:SL<br/>BREVISEPLANT</b>               | 0 | Some concerns | Low risk | Some concerns | Some concerns  | Some concerns | Major concerns | very low | Imprecision, Heterogeneity, Serious Incoherence |
| <b>LSPOSFAECBUTBMES:SL<br/>CAS</b>                        | 0 | Some concerns | Low risk | No concerns   | Major concerns | No concerns   | Major concerns | very low | Serious Imprecision and Incoherence             |
| <b>LSPOSFAECBUTBMES:SL<br/>REUTD</b>                      | 0 | Some concerns | Low risk | No concerns   | Major concerns | No concerns   | Major concerns | very low | Serious Imprecision and Incoherence             |
| <b>LSPOSFAECBUTBMES:SL<br/>REUTDA</b>                     | 0 | Some concerns | Low risk | No concerns   | Major concerns | No concerns   | Major concerns | very low | Serious Imprecision and Incoherence             |
| <b>LSPOSFAECBUTBMES:SL<br/>REUTU</b>                      | 0 | Some concerns | Low risk | No concerns   | No concerns    | No concerns   | Major concerns | very low | Study limitations and Serious Incoherence       |
| <b>LSPOSFAECBUTBMES:SL<br/>REUTSINGLE</b>                 | 0 | No concerns   | Low risk | No concerns   | Some concerns  | Some concerns | Major concerns | very low | Imprecision, Heterogeneity, Serious Incoherence |
| <b>LSPOSFAECBUTBMES:SL<br/>RHAM</b>                       | 0 | No concerns   | Low risk | Some concerns | No concerns    | Some concerns | Major concerns | very low | Heterogeneity and serious Incoherence           |
| <b>LSPOSFAECBUTBMES:SLS<br/>PPBSPP</b>                    | 0 | Some concerns | Low risk | No concerns   | Some concerns  | Some concerns | Major concerns | very low | Imprecision, Heterogeneity, Serious Incoherence |
| <b>LSPOSFAECBUTBMES:SR<br/>P</b>                          | 0 | Some concerns | Low risk | No concerns   | Some concerns  | Some concerns | Major concerns | very low | Imprecision, Heterogeneity, Serious Incoherence |

|                                                              |   |               |          |               |                |               |                |          |                                                       |
|--------------------------------------------------------------|---|---------------|----------|---------------|----------------|---------------|----------------|----------|-------------------------------------------------------|
| <b>LSPOSFAECBUTBMES:SR<br/>PLACIDBINFEFAE</b>                | 0 | Some concerns | Low risk | No concerns   | Major concerns | No concerns   | Major concerns | very low | Serious Imprecision and Incoherence                   |
| <b>LSPOSFAECBUTBMES:SS<br/>ORALUBERRAT</b>                   | 0 | Some concerns | Low risk | Some concerns | Some concerns  | No concerns   | Major concerns | very low | Study limitations, heterogeneity, Serious Incoherence |
| <b>LSPOSFAECBUTBMES:SB<br/>BIF</b>                           | 0 | Some concerns | Low risk | No concerns   | Major concerns | No concerns   | Major concerns | very low | Serious Imprecision and Incoherence                   |
| <b>LSPOSFAECBUTBMES:SF<br/>AECBUTBMESLSPO</b>                | 0 | Some concerns | Low risk | No concerns   | Major concerns | No concerns   | Major concerns | very low | Serious Imprecision and Incoherence                   |
| <b>LSPOSFAECBUTBMES:SL<br/>BREVIS</b>                        | 0 | Some concerns | Low risk | No concerns   | Some concerns  | No concerns   | Major concerns | very low | Study limitations, Imprecision, serious Incoherence   |
| <b>LSPOSFAECBUTBMES:SL<br/>REUT</b>                          | 0 | Some concerns | Low risk | No concerns   | Major concerns | No concerns   | Major concerns | very low | Serious Imprecision and Incoherence                   |
| <b>LSPOSFAECBUTBMES:SL<br/>REUTINCREM</b>                    | 0 | No concerns   | Low risk | No concerns   | Some concerns  | Some concerns | Major concerns | very low | Imprecision, Heterogeneity, Serious Incoherence       |
| <b>LSPOSFAECBUTBMES:SSB<br/>OU</b>                           | 0 | No concerns   | Low risk | No concerns   | Some concerns  | Some concerns | Major concerns | very low | Imprecision, Heterogeneity, Serious Incoherence       |
| <b>SBLACLACIDBBIFLRHAM<br/>:SBLACTDN</b>                     | 0 | No concerns   | Low risk | No concerns   | Major concerns | No concerns   | Major concerns | very low | Serious Imprecision and Incoherence                   |
| <b>SBLACLACIDBBIFLRHAM<br/>:SBLACTIS</b>                     | 0 | No concerns   | Low risk | No concerns   | Major concerns | No concerns   | Major concerns | very low | Serious Imprecision and Incoherence                   |
| <b>SBLACLACIDBBIFLRHAM<br/>:SCHX</b>                         | 0 | Some concerns | Low risk | No concerns   | Major concerns | No concerns   | Major concerns | very low | Serious Imprecision and Incoherence                   |
| <b>SBLACLACIDBBIFLRHAM<br/>:SLACIDLCASBBIFLRHAM<br/>LSAL</b> | 0 | No concerns   | Low risk | No concerns   | Major concerns | No concerns   | Major concerns | very low | Serious Imprecision and Incoherence                   |
| <b>SBLACLACIDBBIFLRHAM<br/>:SLACIDLRHABLONGSBO<br/>UL</b>    | 0 | No concerns   | Low risk | No concerns   | Major concerns | No concerns   | Major concerns | very low | Serious Imprecision and Incoherence                   |
| <b>SBLACLACIDBBIFLRHAM<br/>:SLBREVISEPLANT</b>               | 0 | No concerns   | Low risk | Some concerns | Major concerns | No concerns   | Major concerns | very low | Serious Imprecision and Incoherence                   |
| <b>SBLACLACIDBBIFLRHAM<br/>:SLCAS</b>                        | 0 | No concerns   | Low risk | No concerns   | Major concerns | No concerns   | Major concerns | very low | Serious Imprecision and Incoherence                   |
| <b>SBLACLACIDBBIFLRHAM<br/>:SLREUTD</b>                      | 0 | No concerns   | Low risk | No concerns   | Major concerns | No concerns   | Major concerns | very low | Serious Imprecision and Incoherence                   |



|                                             |   |               |          |               |                |               |                |          |                                                 |
|---------------------------------------------|---|---------------|----------|---------------|----------------|---------------|----------------|----------|-------------------------------------------------|
| <b>SBLACLACIDBBIFLRHAM:SLREUTDA</b>         | 0 | No concerns   | Low risk | No concerns   | Major concerns | No concerns   | Major concerns | very low | Serious Imprecision and Incoherence             |
| <b>SBLACLACIDBBIFLRHAM:SLREUTU</b>          | 0 | No concerns   | Low risk | No concerns   | No concerns    | No concerns   | Major concerns | low      | Serious Incoherence                             |
| <b>SBLACLACIDBBIFLRHAM:SLREUTSINGLE</b>     | 0 | No concerns   | Low risk | No concerns   | Major concerns | No concerns   | Major concerns | very low | Serious Imprecision and Incoherence             |
| <b>SBLACLACIDBBIFLRHAM:SLRHAM</b>           | 0 | No concerns   | Low risk | Some concerns | Some concerns  | Some concerns | Major concerns | very low | Imprecision, Heterogeneity, Serious Incoherence |
| <b>SBLACLACIDBBIFLRHAM:SLSPPBSPP</b>        | 0 | No concerns   | Low risk | No concerns   | Some concerns  | Some concerns | Major concerns | very low | Imprecision, Heterogeneity, Serious Incoherence |
| <b>SBLACLACIDBBIFLRHAM:SRP</b>              | 0 | No concerns   | Low risk | No concerns   | Major concerns | No concerns   | Major concerns | very low | Serious Imprecision and Incoherence             |
| <b>SBLACLACIDBBIFLRHAM:SRPLACIDBINFEFAE</b> | 0 | Some concerns | Low risk | No concerns   | Major concerns | No concerns   | Major concerns | very low | Serious Imprecision and Incoherence             |
| <b>SBLACLACIDBBIFLRHAM:SSORALUBERRAT</b>    | 0 | No concerns   | Low risk | Some concerns | Some concerns  | Some concerns | Major concerns | very low | Imprecision, Heterogeneity, Serious Incoherence |
| <b>SBBIF:SBLACLACIDBBIFLRHAM</b>            | 0 | Some concerns | Low risk | No concerns   | Major concerns | No concerns   | Major concerns | very low | Serious Imprecision and Incoherence             |
| <b>SBLACLACIDBBIFLRHAM:SFAECBUTBMESLSPO</b> | 0 | No concerns   | Low risk | No concerns   | Major concerns | No concerns   | Major concerns | very low | Serious Imprecision and Incoherence             |
| <b>SBLACLACIDBBIFLRHAM:SLBREVIS</b>         | 0 | No concerns   | Low risk | No concerns   | Some concerns  | Some concerns | Major concerns | very low | Imprecision, Heterogeneity, Serious Incoherence |
| <b>SBLACLACIDBBIFLRHAM:SLREUT</b>           | 0 | No concerns   | Low risk | No concerns   | Major concerns | No concerns   | Major concerns | very low | Serious Imprecision and Incoherence             |
| <b>SBLACLACIDBBIFLRHAM:SLREUTINCREM</b>     | 0 | No concerns   | Low risk | No concerns   | Major concerns | No concerns   | Major concerns | very low | Serious Imprecision and Incoherence             |
| <b>SBLACLACIDBBIFLRHAM:SSBOU</b>            | 0 | No concerns   | Low risk | No concerns   | No concerns    | Some concerns | Major concerns | very low | Heterogeneity and serious Incoherence           |
| <b>SBLACTDN:SBLACTIS</b>                    | 0 | No concerns   | Low risk | No concerns   | Major concerns | No concerns   | Major concerns | very low | Serious Imprecision and Incoherence             |
| <b>SBLACTDN:SCHX</b>                        | 0 | Some concerns | Low risk | No concerns   | Major concerns | No concerns   | Major concerns | very low | Serious Imprecision and Incoherence             |

|                                              |   |               |          |               |                |               |                |          |                                                 |
|----------------------------------------------|---|---------------|----------|---------------|----------------|---------------|----------------|----------|-------------------------------------------------|
| <b>SBLACTDN:SLACIDLCASB<br/>BIFLRHAMLSAL</b> | 0 | No concerns   | Low risk | No concerns   | Major concerns | No concerns   | Major concerns | very low | Serious Imprecision and Incoherence             |
| <b>SBLACTDN:SLACIDLRHA<br/>BLONGSBOUL</b>    | 0 | No concerns   | Low risk | No concerns   | Major concerns | No concerns   | Major concerns | very low | Serious Imprecision and Incoherence             |
| <b>SBLACTDN:SLBREVISEPL<br/>ANT</b>          | 0 | No concerns   | Low risk | Some concerns | Major concerns | No concerns   | Major concerns | very low | Serious Imprecision and Incoherence             |
| <b>SBLACTDN:SLCAS</b>                        | 0 | No concerns   | Low risk | No concerns   | Some concerns  | Some concerns | Major concerns | very low | Imprecision, Heterogeneity, Serious Incoherence |
| <b>SBLACTDN:SLREUTD</b>                      | 0 | No concerns   | Low risk | No concerns   | Major concerns | No concerns   | Major concerns | very low | Serious Imprecision and Incoherence             |
| <b>SBLACTDN:SLREUTDA</b>                     | 0 | No concerns   | Low risk | No concerns   | Some concerns  | Some concerns | Major concerns | very low | Imprecision, Heterogeneity, Serious Incoherence |
| <b>SBLACTDN:SLREUTU</b>                      | 0 | No concerns   | Low risk | No concerns   | No concerns    | No concerns   | Major concerns | low      | Serious Incoherence                             |
| <b>SBLACTDN:SLREUTSINGL<br/>E</b>            | 0 | No concerns   | Low risk | No concerns   | Major concerns | No concerns   | Major concerns | very low | Serious Imprecision and Incoherence             |
| <b>SBLACTDN:SLRHAM</b>                       | 0 | No concerns   | Low risk | Some concerns | Major concerns | No concerns   | Major concerns | very low | Serious Imprecision and Incoherence             |
| <b>SBLACTDN:SLSPPBSPP</b>                    | 0 | No concerns   | Low risk | No concerns   | Major concerns | No concerns   | Major concerns | very low | Serious Imprecision and Incoherence             |
| <b>SBLACTDN:SRP</b>                          | 0 | No concerns   | Low risk | No concerns   | Major concerns | No concerns   | Major concerns | very low | Serious Imprecision and Incoherence             |
| <b>SBLACTDN:SRPLACIDBIN<br/>FEFAE</b>        | 0 | Some concerns | Low risk | No concerns   | Some concerns  | Some concerns | Major concerns | very low | Imprecision, Heterogeneity, Serious Incoherence |
| <b>SBLACTDN:SSORALUBER<br/>RAT</b>           | 0 | No concerns   | Low risk | Some concerns | Major concerns | No concerns   | Major concerns | very low | Serious Imprecision and Incoherence             |
| <b>SBBIF:SBLACTDN</b>                        | 0 | Some concerns | Low risk | No concerns   | Major concerns | No concerns   | Major concerns | very low | Serious Imprecision and Incoherence             |
| <b>SBLACTDN:SFAECBUTBM<br/>ESLSPO</b>        | 0 | No concerns   | Low risk | No concerns   | Major concerns | No concerns   | Major concerns | very low | Serious Imprecision and Incoherence             |
| <b>SBLACTDN:SLBREVIS</b>                     | 0 | No concerns   | Low risk | No concerns   | Major concerns | No concerns   | Major concerns | very low | Serious Imprecision and Incoherence             |

|                                         |   |               |          |               |                |               |                |          |                                                 |
|-----------------------------------------|---|---------------|----------|---------------|----------------|---------------|----------------|----------|-------------------------------------------------|
| <b>SBLACTDN:SLREUT</b>                  | 0 | No concerns   | Low risk | No concerns   | Some concerns  | Some concerns | Major concerns | very low | Imprecision, Heterogeneity, Serious Incoherence |
| <b>SBLACTDN:SLREUTINCREM</b>            | 0 | No concerns   | Low risk | No concerns   | Major concerns | No concerns   | Major concerns | very low | Serious Imprecision and Incoherence             |
| <b>SBLACTDN:SSBOU</b>                   | 0 | No concerns   | Low risk | No concerns   | No concerns    | No concerns   | Major concerns | low      | Serious Incoherence                             |
| <b>SBLACTIS:SCHX</b>                    | 0 | Some concerns | Low risk | No concerns   | Major concerns | No concerns   | Major concerns | very low | Serious Imprecision and Incoherence             |
| <b>SBLACTIS:SLACIDLCASB BIFLRHMLSAL</b> | 0 | No concerns   | Low risk | No concerns   | Major concerns | No concerns   | Major concerns | very low | Serious Imprecision and Incoherence             |
| <b>SBLACTIS:SLACIDLRHAB LONGSBOUL</b>   | 0 | No concerns   | Low risk | No concerns   | Major concerns | No concerns   | Major concerns | very low | Serious Imprecision and Incoherence             |
| <b>SBLACTIS:SLBREVISEPLANT</b>          | 0 | No concerns   | Low risk | Some concerns | Major concerns | No concerns   | Major concerns | very low | Serious Imprecision and Incoherence             |
| <b>SBLACTIS:SLCAS</b>                   | 0 | No concerns   | Low risk | No concerns   | Some concerns  | Some concerns | Major concerns | very low | Imprecision, Heterogeneity, Serious Incoherence |
| <b>SBLACTIS:SLREUTD</b>                 | 0 | No concerns   | Low risk | No concerns   | Major concerns | No concerns   | Major concerns | very low | Serious Imprecision and Incoherence             |
| <b>SBLACTIS:SLREUTDA</b>                | 0 | No concerns   | Low risk | No concerns   | Major concerns | No concerns   | Major concerns | very low | Serious Imprecision and Incoherence             |
| <b>SBLACTIS:SLREUTU</b>                 | 0 | No concerns   | Low risk | No concerns   | No concerns    | No concerns   | Major concerns | low      | Serious Incoherence                             |
| <b>SBLACTIS:SLREUTSINGLE</b>            | 0 | No concerns   | Low risk | No concerns   | Major concerns | No concerns   | Major concerns | very low | Serious Imprecision and Incoherence             |
| <b>SBLACTIS:SLRHAM</b>                  | 0 | No concerns   | Low risk | Some concerns | Some concerns  | Some concerns | Major concerns | very low | Imprecision, Heterogeneity, Serious Incoherence |
| <b>SBLACTIS:SLSPPBSPP</b>               | 0 | No concerns   | Low risk | No concerns   | Major concerns | No concerns   | Major concerns | very low | Serious Imprecision and Incoherence             |
| <b>SBLACTIS:SRP</b>                     | 0 | No concerns   | Low risk | No concerns   | Major concerns | No concerns   | Major concerns | very low | Serious Imprecision and Incoherence             |
| <b>SBLACTIS:SRPLACIDBINFEFAE</b>        | 0 | Some concerns | Low risk | No concerns   | Major concerns | No concerns   | Major concerns | very low | Serious Imprecision and Incoherence             |

|                                          |   |               |          |               |                |               |                |          |                                                 |
|------------------------------------------|---|---------------|----------|---------------|----------------|---------------|----------------|----------|-------------------------------------------------|
| <b>SBLACTIS:SSORALUBERRAT</b>            | 0 | No concerns   | Low risk | Some concerns | Major concerns | No concerns   | Major concerns | very low | Serious Imprecision and Incoherence             |
| <b>SBBIF:SBLACTIS</b>                    | 0 | Some concerns | Low risk | No concerns   | Major concerns | No concerns   | Major concerns | very low | Serious Imprecision and Incoherence             |
| <b>SBLACTIS:SFAECBUTBME<br/>SLSPO</b>    | 0 | No concerns   | Low risk | No concerns   | Major concerns | No concerns   | Major concerns | very low | Serious Imprecision and Incoherence             |
| <b>SBLACTIS:SLBREVIS</b>                 | 0 | No concerns   | Low risk | No concerns   | Major concerns | No concerns   | Major concerns | very low | Serious Imprecision and Incoherence             |
| <b>SBLACTIS:SLREUT</b>                   | 0 | No concerns   | Low risk | No concerns   | Some concerns  | Some concerns | Major concerns | very low | Imprecision, Heterogeneity, Serious Incoherence |
| <b>SBLACTIS:SLREUTINCREM</b>             | 0 | No concerns   | Low risk | No concerns   | Major concerns | No concerns   | Major concerns | very low | Serious Imprecision and Incoherence             |
| <b>SBLACTIS:SSBOU</b>                    | 0 | No concerns   | Low risk | No concerns   | No concerns    | Some concerns | Major concerns | very low | Heterogeneity and serious Incoherence           |
| <b>SCHX:SLACIDLCASBBIFL<br/>RHAMLSAL</b> | 0 | Some concerns | Low risk | Some concerns | Major concerns | No concerns   | Major concerns | very low | Serious Imprecision and Incoherence             |
| <b>SCHX:SLACIDLRHABLON<br/>GSBOUL</b>    | 0 | Some concerns | Low risk | No concerns   | Major concerns | No concerns   | Major concerns | very low | Serious Imprecision and Incoherence             |
| <b>SCHX:SLBREVISEPLANT</b>               | 0 | Some concerns | Low risk | Some concerns | Major concerns | No concerns   | Major concerns | very low | Serious Imprecision and Incoherence             |
| <b>SCHX:SLCAS</b>                        | 0 | Some concerns | Low risk | No concerns   | Some concerns  | Some concerns | Major concerns | very low | Imprecision, Heterogeneity, Serious Incoherence |
| <b>SCHX:SLREUTD</b>                      | 0 | Some concerns | Low risk | No concerns   | Major concerns | No concerns   | Major concerns | very low | Serious Imprecision and Incoherence             |
| <b>SCHX:SLREUTDA</b>                     | 0 | Some concerns | Low risk | No concerns   | Major concerns | No concerns   | Major concerns | very low | Serious Imprecision and Incoherence             |
| <b>SCHX:SLREUTU</b>                      | 0 | Some concerns | Low risk | No concerns   | No concerns    | No concerns   | Major concerns | very low | Study limitations and Serious Incoherence       |
| <b>SCHX:SLREUTSINGLE</b>                 | 0 | Some concerns | Low risk | No concerns   | Major concerns | No concerns   | Major concerns | very low | Serious Imprecision and Incoherence             |
| <b>SCHX:SLRHAM</b>                       | 0 | Some concerns | Low risk | Some concerns | Some concerns  | Some concerns | Major concerns | very low | Imprecision, Heterogeneity, Serious Incoherence |

|                                                     |   |                |          |               |                |               |                |          |                                                 |
|-----------------------------------------------------|---|----------------|----------|---------------|----------------|---------------|----------------|----------|-------------------------------------------------|
| <b>SCHX:SLSPPBSPP</b>                               | 0 | Some concerns  | Low risk | No concerns   | Some concerns  | Some concerns | Major concerns | very low | Imprecision, Heterogeneity, Serious Incoherence |
| <b>SCHX:SRPLACIDBINFEFAE</b>                        | 0 | Major concerns | Low risk | Some concerns | Some concerns  | Some concerns | Major concerns | very low | Imprecision, Heterogeneity, Serious Incoherence |
| <b>SCHX:SSORALUBERRAT</b>                           | 0 | Some concerns  | Low risk | Some concerns | Some concerns  | Some concerns | Major concerns | very low | Imprecision, Heterogeneity, Serious Incoherence |
| <b>SCHX:SFAECBUTBMESLSPO</b>                        | 0 | Some concerns  | Low risk | Some concerns | Major concerns | No concerns   | Major concerns | very low | Serious Imprecision and Incoherence             |
| <b>SCHX:SLBREVIS</b>                                | 0 | Some concerns  | Low risk | No concerns   | Some concerns  | Some concerns | Major concerns | very low | Imprecision, Heterogeneity, Serious Incoherence |
| <b>SCHX:SLREUT</b>                                  | 0 | Some concerns  | Low risk | Some concerns | Some concerns  | Some concerns | Major concerns | very low | Imprecision, Heterogeneity, Serious Incoherence |
| <b>SCHX:SLREUTINCREM</b>                            | 0 | Some concerns  | Low risk | No concerns   | Major concerns | No concerns   | Major concerns | very low | Serious Imprecision and Incoherence             |
| <b>SCHX:SPLAC</b>                                   | 0 | Some concerns  | Low risk | No concerns   | Some concerns  | Some concerns | Major concerns | very low | Imprecision, Heterogeneity, Serious Incoherence |
| <b>SCHX:SSBOU</b>                                   | 0 | Some concerns  | Low risk | No concerns   | No concerns    | Some concerns | Major concerns | very low | Heterogeneity and serious Incoherence           |
| <b>SLACIDLCASBBIFLRHAMLSAL:SLACIDLRHABLONGSBOUL</b> | 0 | No concerns    | Low risk | No concerns   | Major concerns | No concerns   | Major concerns | very low | Serious Imprecision and Incoherence             |
| <b>SLACIDLCASBBIFLRHAMLSAL:SLBREVISEPLANT</b>       | 0 | No concerns    | Low risk | Some concerns | Major concerns | No concerns   | Major concerns | very low | Serious Imprecision and Incoherence             |
| <b>SLACIDLCASBBIFLRHAMLSAL:SLCAS</b>                | 0 | Some concerns  | Low risk | Some concerns | Some concerns  | Some concerns | Major concerns | very low | Imprecision, Heterogeneity, Serious Incoherence |
| <b>SLACIDLCASBBIFLRHAMLSAL:SLREUTD</b>              | 0 | Some concerns  | Low risk | No concerns   | Major concerns | No concerns   | Major concerns | very low | Serious Imprecision and Incoherence             |
| <b>SLACIDLCASBBIFLRHAMLSAL:SLREUTDA</b>             | 0 | Some concerns  | Low risk | Some concerns | Major concerns | No concerns   | Major concerns | very low | Serious Imprecision and Incoherence             |
| <b>SLACIDLCASBBIFLRHAMLSAL:SLREUTU</b>              | 0 | Some concerns  | Low risk | Some concerns | No concerns    | No concerns   | Major concerns | very low | Study limitations and Serious Incoherence       |
| <b>SLACIDLCASBBIFLRHAMLSAL:SLREUTSINGLE</b>         | 0 | No concerns    | Low risk | No concerns   | Major concerns | No concerns   | Major concerns | very low | Serious Imprecision and Incoherence             |

|                                                           |   |                |          |               |                |               |                |          |                                                 |
|-----------------------------------------------------------|---|----------------|----------|---------------|----------------|---------------|----------------|----------|-------------------------------------------------|
| <b>SLACIDLCASBBIFLRHAM<br/>LSAL:SLRHAM</b>                | 0 | No concerns    | Low risk | Some concerns | Major concerns | No concerns   | Major concerns | very low | Serious Imprecision and Incoherence             |
| <b>SLACIDLCASBBIFLRHAM<br/>LSAL:SLSPPBSPP</b>             | 0 | No concerns    | Low risk | No concerns   | Major concerns | No concerns   | Major concerns | very low | Serious Imprecision and Incoherence             |
| <b>SLACIDLCASBBIFLRHAM<br/>LSAL:SRPLACIDBINFEFA<br/>E</b> | 0 | Major concerns | Low risk | Some concerns | Some concerns  | Some concerns | Major concerns | very low | Imprecision, Heterogeneity, Serious Incoherence |
| <b>SLACIDLCASBBIFLRHAM<br/>LSAL:SSORALUBERRAT</b>         | 0 | No concerns    | Low risk | Some concerns | Major concerns | No concerns   | Major concerns | very low | Serious Imprecision and Incoherence             |
| <b>SBBIF:SLACIDLCASBBIFL<br/>RHAMLSAL</b>                 | 0 | Some concerns  | Low risk | Some concerns | Major concerns | No concerns   | Major concerns | very low | Serious Imprecision and Incoherence             |
| <b>SFAECBUTBMESLSPO:SL<br/>ACIDLCASBBIFLRHAMLS<br/>AL</b> | 0 | Some concerns  | Low risk | Some concerns | Major concerns | No concerns   | Major concerns | very low | Serious Imprecision and Incoherence             |
| <b>SLACIDLCASBBIFLRHAM<br/>LSAL:SLBREVIS</b>              | 0 | No concerns    | Low risk | No concerns   | Major concerns | No concerns   | Major concerns | very low | Serious Imprecision and Incoherence             |
| <b>SLACIDLCASBBIFLRHAM<br/>LSAL:SLREUT</b>                | 0 | Some concerns  | Low risk | Some concerns | Some concerns  | Some concerns | Major concerns | very low | Imprecision, Heterogeneity, Serious Incoherence |
| <b>SLACIDLCASBBIFLRHAM<br/>LSAL:SLREUTINCREM</b>          | 0 | No concerns    | Low risk | No concerns   | Major concerns | No concerns   | Major concerns | very low | Serious Imprecision and Incoherence             |
| <b>SLACIDLCASBBIFLRHAM<br/>LSAL:SPLAC</b>                 | 0 | Some concerns  | Low risk | Some concerns | Major concerns | No concerns   | Major concerns | very low | Serious Imprecision and Incoherence             |
| <b>SLACIDLCASBBIFLRHAM<br/>LSAL:SSBOU</b>                 | 0 | Some concerns  | Low risk | Some concerns | No concerns    | No concerns   | Major concerns | very low | Study limitations and Serious Incoherence       |
| <b>SLACIDLRHABLONGBO<br/>UL:SLBREVISEPLANT</b>            | 0 | No concerns    | Low risk | Some concerns | Major concerns | No concerns   | Major concerns | very low | Serious Imprecision and Incoherence             |
| <b>SLACIDLRHABLONGBO<br/>UL:SLCAS</b>                     | 0 | No concerns    | Low risk | No concerns   | Major concerns | No concerns   | Major concerns | very low | Serious Imprecision and Incoherence             |
| <b>SLACIDLRHABLONGBO<br/>UL:SLREUTD</b>                   | 0 | No concerns    | Low risk | No concerns   | Major concerns | No concerns   | Major concerns | very low | Serious Imprecision and Incoherence             |
| <b>SLACIDLRHABLONGBO<br/>UL:SLREUTDA</b>                  | 0 | No concerns    | Low risk | No concerns   | Major concerns | No concerns   | Major concerns | very low | Serious Imprecision and Incoherence             |
| <b>SLACIDLRHABLONGBO<br/>UL:SLREUTU</b>                   | 0 | No concerns    | Low risk | No concerns   | No concerns    | No concerns   | Major concerns | low      | Serious Incoherence                             |

|                                             |   |               |          |               |                |               |                |          |                                                 |
|---------------------------------------------|---|---------------|----------|---------------|----------------|---------------|----------------|----------|-------------------------------------------------|
| <b>SLACIDLRHABLONGBOUL:SLREUTSINGLE</b>     | 0 | No concerns   | Low risk | No concerns   | Major concerns | No concerns   | Major concerns | very low | Serious Imprecision and Incoherence             |
| <b>SLACIDLRHABLONGBOUL:SLRHAM</b>           | 0 | No concerns   | Low risk | Some concerns | Some concerns  | Some concerns | Major concerns | very low | Imprecision, Heterogeneity, Serious Incoherence |
| <b>SLACIDLRHABLONGBOUL:SLSPPBSPP</b>        | 0 | No concerns   | Low risk | No concerns   | Some concerns  | Some concerns | Major concerns | very low | Imprecision, Heterogeneity, Serious Incoherence |
| <b>SLACIDLRHABLONGBOUL:SRP</b>              | 0 | No concerns   | Low risk | No concerns   | Major concerns | No concerns   | Major concerns | very low | Serious Imprecision and Incoherence             |
| <b>SLACIDLRHABLONGBOUL:SRPLACIDBINFEFAE</b> | 0 | Some concerns | Low risk | No concerns   | Major concerns | No concerns   | Major concerns | very low | Serious Imprecision and Incoherence             |
| <b>SLACIDLRHABLONGBOUL:SSORALUBERRAT</b>    | 0 | No concerns   | Low risk | Some concerns | Some concerns  | Some concerns | Major concerns | very low | Imprecision, Heterogeneity, Serious Incoherence |
| <b>SBBIF:SLACIDLRHABLONGBOUL</b>            | 0 | Some concerns | Low risk | No concerns   | Major concerns | No concerns   | Major concerns | very low | Serious Imprecision and Incoherence             |
| <b>SFAECBUTBMESLSPO:SLACIDLRHABLONGBOUL</b> | 0 | No concerns   | Low risk | No concerns   | Major concerns | No concerns   | Major concerns | very low | Serious Imprecision and Incoherence             |
| <b>SLACIDLRHABLONGBOUL:SLBREVIS</b>         | 0 | No concerns   | Low risk | No concerns   | Major concerns | No concerns   | Major concerns | very low | Serious Imprecision and Incoherence             |
| <b>SLACIDLRHABLONGBOUL:SLREUT</b>           | 0 | No concerns   | Low risk | No concerns   | Some concerns  | Some concerns | Major concerns | very low | Imprecision, Heterogeneity, Serious Incoherence |
| <b>SLACIDLRHABLONGBOUL:SLREUTINCREM</b>     | 0 | No concerns   | Low risk | No concerns   | Major concerns | No concerns   | Major concerns | very low | Serious Imprecision and Incoherence             |
| <b>SLACIDLRHABLONGBOUL:SSBOU</b>            | 0 | No concerns   | Low risk | No concerns   | No concerns    | Some concerns | Major concerns | very low | Heterogeneity and serious Incoherence           |
| <b>SLBREVISEPLANT:SLCAS</b>                 | 0 | No concerns   | Low risk | No concerns   | Some concerns  | Some concerns | Major concerns | very low | Imprecision, Heterogeneity, Serious Incoherence |
| <b>SLBREVISEPLANT:SLREUTD</b>               | 0 | No concerns   | Low risk | No concerns   | Some concerns  | Some concerns | Major concerns | very low | Imprecision, Heterogeneity, Serious Incoherence |
| <b>SLBREVISEPLANT:SLREUTDA</b>              | 0 | No concerns   | Low risk | Some concerns | Some concerns  | Some concerns | Major concerns | very low | Imprecision, Heterogeneity, Serious Incoherence |
| <b>SLBREVISEPLANT:SLREUTU</b>               | 0 | No concerns   | Low risk | No concerns   | No concerns    | No concerns   | Major concerns | low      | Serious Incoherence                             |

|                                             |   |               |          |               |                |               |                |          |                                                 |
|---------------------------------------------|---|---------------|----------|---------------|----------------|---------------|----------------|----------|-------------------------------------------------|
| <b>SLBREVISEPLANT:SLREU<br/>TSINGLE</b>     | 0 | No concerns   | Low risk | No concerns   | Major concerns | No concerns   | Major concerns | very low | Serious Imprecision and Incoherence             |
| <b>SLBREVISEPLANT:SLRHA<br/>M</b>           | 0 | No concerns   | Low risk | Some concerns | Major concerns | No concerns   | Major concerns | very low | Serious Imprecision and Incoherence             |
| <b>SLBREVISEPLANT:SLSPP<br/>BSPP</b>        | 0 | No concerns   | Low risk | Some concerns | Major concerns | No concerns   | Major concerns | very low | Serious Imprecision and Incoherence             |
| <b>SLBREVISEPLANT:SRP</b>                   | 0 | No concerns   | Low risk | Some concerns | Major concerns | No concerns   | Major concerns | very low | Serious Imprecision and Incoherence             |
| <b>SLBREVISEPLANT:SRPLA<br/>CIDBINFEFAE</b> | 0 | Some concerns | Low risk | Some concerns | Some concerns  | Some concerns | Major concerns | very low | Imprecision, Heterogeneity, Serious Incoherence |
| <b>SLBREVISEPLANT:SSORA<br/>LUBERRAT</b>    | 0 | No concerns   | Low risk | Some concerns | Major concerns | No concerns   | Major concerns | very low | Serious Imprecision and Incoherence             |
| <b>SBBIF:SLBREVISEPLANT</b>                 | 0 | Some concerns | Low risk | No concerns   | Major concerns | No concerns   | Major concerns | very low | Serious Imprecision and Incoherence             |
| <b>SFAECBUTBMESLSPO:SL<br/>BREVISEPLANT</b> | 0 | No concerns   | Low risk | Some concerns | Major concerns | No concerns   | Major concerns | very low | Serious Imprecision and Incoherence             |
| <b>SLBREVIS:SLBREVISEPLA<br/>NT</b>         | 0 | No concerns   | Low risk | Some concerns | Major concerns | No concerns   | Major concerns | very low | Serious Imprecision and Incoherence             |
| <b>SLBREVISEPLANT:SLREU<br/>T</b>           | 0 | No concerns   | Low risk | Some concerns | No concerns    | Some concerns | Major concerns | very low | Heterogeneity and serious Incoherence           |
| <b>SLBREVISEPLANT:SLREU<br/>TINCREM</b>     | 0 | No concerns   | Low risk | No concerns   | Major concerns | No concerns   | Major concerns | very low | Serious Imprecision and Incoherence             |
| <b>SLBREVISEPLANT:SSBOU</b>                 | 0 | No concerns   | Low risk | No concerns   | No concerns    | No concerns   | Major concerns | low      | Serious Incoherence                             |
| <b>SLCAS:SLREUTD</b>                        | 0 | Some concerns | Low risk | No concerns   | Some concerns  | Some concerns | Major concerns | very low | Imprecision, Heterogeneity, Serious Incoherence |
| <b>SLCAS:SLREUTDA</b>                       | 0 | Some concerns | Low risk | No concerns   | Some concerns  | Some concerns | Major concerns | very low | Imprecision, Heterogeneity, Serious Incoherence |
| <b>SLCAS:SLREUTU</b>                        | 0 | Some concerns | Low risk | No concerns   | No concerns    | No concerns   | Major concerns | very low | Serious Incoherence                             |
| <b>SLCAS:SLREUTSINGLE</b>                   | 0 | No concerns   | Low risk | No concerns   | Some concerns  | Some concerns | Major concerns | very low | Imprecision, Heterogeneity, Serious Incoherence |



|                               |   |                |          |               |                |               |                |          |                                                 |
|-------------------------------|---|----------------|----------|---------------|----------------|---------------|----------------|----------|-------------------------------------------------|
| <b>SLCAS:SLRHAM</b>           | 0 | No concerns    | Low risk | No concerns   | No concerns    | Some concerns | Major concerns | very low | Serious Incoherence                             |
| <b>SLCAS:SLSPBSPP</b>         | 0 | No concerns    | Low risk | No concerns   | Some concerns  | No concerns   | Major concerns | very low | Imprecision, Heterogeneity, Serious Incoherence |
| <b>SLCAS:SRPLACIDBINFEFAE</b> | 0 | Major concerns | Low risk | Some concerns | Major concerns | No concerns   | Major concerns | very low | Serious Imprecision and Incoherence             |
| <b>SLCAS:SSORALUBERRAT</b>    | 0 | No concerns    | Low risk | No concerns   | Some concerns  | No concerns   | Major concerns | very low | Imprecision, Serious Incoherence                |
| <b>SBBIF:SLCAS</b>            | 0 | Some concerns  | Low risk | No concerns   | Some concerns  | Some concerns | Major concerns | very low | Imprecision, Heterogeneity, Serious Incoherence |
| <b>SFAECBUTBMESLSPO:SLCAS</b> | 0 | Some concerns  | Low risk | Some concerns | Some concerns  | Some concerns | Major concerns | very low | Imprecision, Heterogeneity, Serious Incoherence |
| <b>SLBREVIS:SLCAS</b>         | 0 | No concerns    | Low risk | No concerns   | Some concerns  | No concerns   | Major concerns | very low | Imprecision, Serious Incoherence                |
| <b>SLCAS:SLREUT</b>           | 0 | Some concerns  | Low risk | No concerns   | Major concerns | No concerns   | Major concerns | very low | Serious Imprecision and Incoherence             |
| <b>SLCAS:SLREUTINCREM</b>     | 0 | No concerns    | Low risk | No concerns   | Some concerns  | Some concerns | Major concerns | very low | Imprecision, Heterogeneity, Serious Incoherence |
| <b>SLCAS:SPLAC</b>            | 0 | Some concerns  | Low risk | No concerns   | No concerns    | Some concerns | Major concerns | very low | Heterogeneity and serious Incoherence           |
| <b>SLCAS:SSBOU</b>            | 0 | Some concerns  | Low risk | No concerns   | Some concerns  | Some concerns | Major concerns | very low | Imprecision, Heterogeneity, Serious Incoherence |
| <b>SLREUTD:SLREUTDA</b>       | 0 | No concerns    | Low risk | No concerns   | Major concerns | No concerns   | Major concerns | very low | Serious Imprecision and Incoherence             |
| <b>SLREUTD:SLREUTU</b>        | 0 | Some concerns  | Low risk | No concerns   | No concerns    | No concerns   | Major concerns | very low | Serious Incoherence                             |
| <b>SLREUTD:SLREUTSINGLE</b>   | 0 | No concerns    | Low risk | No concerns   | Major concerns | No concerns   | Major concerns | very low | Serious Imprecision and Incoherence             |
| <b>SLREUTD:SLRHAM</b>         | 0 | No concerns    | Low risk | No concerns   | Some concerns  | No concerns   | Major concerns | very low | Imprecision, Heterogeneity, Serious Incoherence |
| <b>SLREUTD:SLSPBSPP</b>       | 0 | No concerns    | Low risk | No concerns   | Some concerns  | Some concerns | Major concerns | very low | Imprecision, Heterogeneity, Serious Incoherence |

|                                  |   |               |          |               |                |               |                |          |                                                 |
|----------------------------------|---|---------------|----------|---------------|----------------|---------------|----------------|----------|-------------------------------------------------|
| <b>SLREUTD:SRPLACIDBINFEFAE</b>  | 0 | Some concerns | Low risk | No concerns   | Major concerns | No concerns   | Major concerns | very low | Serious Imprecision and Incoherence             |
| <b>SLREUTD:SSORALUBERRAT</b>     | 0 | No concerns   | Low risk | No concerns   | Some concerns  | Some concerns | Major concerns | very low | Imprecision, Heterogeneity, Serious Incoherence |
| <b>SBBIF:SLREUTD</b>             | 0 | Some concerns | Low risk | No concerns   | Major concerns | No concerns   | Major concerns | very low | Serious Imprecision and Incoherence             |
| <b>SFAECBUTBMESLSPO:SLREUTD</b>  | 0 | Some concerns | Low risk | No concerns   | Major concerns | No concerns   | Major concerns | very low | Serious Imprecision and Incoherence             |
| <b>SLBREVIS:SLREUTD</b>          | 0 | No concerns   | Low risk | No concerns   | Some concerns  | Some concerns | Major concerns | very low | Imprecision, Heterogeneity, Serious Incoherence |
| <b>SLREUT:SLREUTD</b>            | 0 | No concerns   | Low risk | No concerns   | Some concerns  | Some concerns | Major concerns | very low | Imprecision, Heterogeneity, Serious Incoherence |
| <b>SLREUTD:SLREUTINCREM</b>      | 0 | No concerns   | Low risk | No concerns   | Some concerns  | Some concerns | Major concerns | very low | Imprecision, Heterogeneity, Serious Incoherence |
| <b>SLREUTD:SSBOU</b>             | 0 | No concerns   | Low risk | No concerns   | No concerns    | Some concerns | Major concerns | very low | Heterogeneity and serious Incoherence           |
| <b>SLREUTDA:SLREUTU</b>          | 0 | Some concerns | Low risk | No concerns   | No concerns    | No concerns   | Major concerns | very low | Serious Incoherence                             |
| <b>SLREUTDA:SLREUTSINGLE</b>     | 0 | No concerns   | Low risk | No concerns   | Some concerns  | Some concerns | Major concerns | very low | Imprecision, Heterogeneity, Serious Incoherence |
| <b>SLREUTDA:SLRHAM</b>           | 0 | No concerns   | Low risk | Some concerns | No concerns    | Some concerns | Major concerns | very low | Heterogeneity and serious Incoherence           |
| <b>SLREUTDA:SLSPPBSPP</b>        | 0 | No concerns   | Low risk | No concerns   | Some concerns  | Some concerns | Major concerns | very low | Imprecision, Heterogeneity, Serious Incoherence |
| <b>SLREUTDA:SRPLACIDBINFEFAE</b> | 0 | Some concerns | Low risk | Some concerns | Major concerns | No concerns   | Major concerns | very low | Serious Imprecision and Incoherence             |
| <b>SLREUTDA:SSORALUBERRAT</b>    | 0 | No concerns   | Low risk | Some concerns | Some concerns  | Some concerns | Major concerns | very low | Imprecision, Heterogeneity, Serious Incoherence |
| <b>SBBIF:SLREUTDA</b>            | 0 | Some concerns | Low risk | No concerns   | Major concerns | No concerns   | Major concerns | very low | Serious Imprecision and Incoherence             |
| <b>SFAECBUTBMESLSPO:SLREUTDA</b> | 0 | Some concerns | Low risk | Some concerns | Major concerns | No concerns   | Major concerns | very low | Serious Imprecision and Incoherence             |

|                                 |   |                |          |               |               |               |                |          |                                                 |
|---------------------------------|---|----------------|----------|---------------|---------------|---------------|----------------|----------|-------------------------------------------------|
| <b>SLBREVIS:SLREUTDA</b>        | 0 | No concerns    | Low risk | No concerns   | Some concerns | Some concerns | Major concerns | very low | Imprecision, Heterogeneity, Serious Incoherence |
| <b>SLREUT:SLREUTDA</b>          | 0 | No concerns    | Low risk | No concerns   | Some concerns | Some concerns | Major concerns | very low | Imprecision, Heterogeneity, Serious Incoherence |
| <b>SLREUTDA:SLREUTINCREM</b>    | 0 | No concerns    | Low risk | No concerns   | Some concerns | Some concerns | Major concerns | very low | Imprecision, Heterogeneity, Serious Incoherence |
| <b>SLREUTDA:SSBOU</b>           | 0 | No concerns    | Low risk | No concerns   | No concerns   | Some concerns | Major concerns | very low | Heterogeneity and serious Incoherence           |
| <b>SLREUTSINGLE:SLREUTU</b>     | 0 | No concerns    | Low risk | No concerns   | No concerns   | No concerns   | Major concerns | low      | Serious Incoherence                             |
| <b>SLREUTU:SLRHAM</b>           | 0 | No concerns    | Low risk | No concerns   | No concerns   | No concerns   | Major concerns | low      | Serious Incoherence                             |
| <b>SLREUTU:SLSPPBSPP</b>        | 0 | No concerns    | Low risk | No concerns   | No concerns   | No concerns   | Major concerns | low      | Serious Incoherence                             |
| <b>SLREUTU:SRPLACIDBINFEFAE</b> | 0 | Major concerns | Low risk | Some concerns | No concerns   | No concerns   | Major concerns | very low | Study limitations, Serious Incoherence          |
| <b>SLREUTU:SSORALUBERRAT</b>    | 0 | No concerns    | Low risk | No concerns   | No concerns   | No concerns   | Major concerns | low      | Serious Incoherence                             |
| <b>SBBIF:SLREUTU</b>            | 0 | Some concerns  | Low risk | No concerns   | No concerns   | No concerns   | Major concerns | very low | Study limitations, Serious Incoherence          |
| <b>SFAECBUTBMESLSPO:SLREUTU</b> | 0 | Some concerns  | Low risk | Some concerns | No concerns   | No concerns   | Major concerns | very low | Study limitations, Serious Incoherence          |
| <b>SLBREVIS:SLREUTU</b>         | 0 | No concerns    | Low risk | No concerns   | No concerns   | No concerns   | Major concerns | low      | Serious Incoherence                             |
| <b>SLREUT:SLREUTU</b>           | 0 | Some concerns  | Low risk | No concerns   | No concerns   | No concerns   | Major concerns | very low | Study limitations, Serious Incoherence          |
| <b>SLREUTINCREM:SLREUTU</b>     | 0 | No concerns    | Low risk | No concerns   | No concerns   | No concerns   | Major concerns | low      | Serious Incoherence                             |
| <b>SLREUTU:SPLAC</b>            | 0 | Some concerns  | Low risk | No concerns   | No concerns   | No concerns   | Major concerns | very low | Study limitations, Serious Incoherence          |
| <b>SLREUTU:SSBOU</b>            | 0 | Some concerns  | Low risk | No concerns   | No concerns   | No concerns   | Major concerns | very low | Study limitations, Serious Incoherence          |

|                                      |   |               |          |               |                |               |                |          |                                                 |
|--------------------------------------|---|---------------|----------|---------------|----------------|---------------|----------------|----------|-------------------------------------------------|
| <b>SLREUTSINGLE:SLRHAM</b>           | 0 | No concerns   | Low risk | No concerns   | Major concerns | No concerns   | Major concerns | very low | Serious Imprecision and Incoherence             |
| <b>SLREUTSINGLE:SLSPPBSP P</b>       | 0 | No concerns   | Low risk | No concerns   | Major concerns | No concerns   | Major concerns | very low | Serious Imprecision and Incoherence             |
| <b>SLREUTSINGLE:SRP</b>              | 0 | No concerns   | Low risk | No concerns   | Major concerns | No concerns   | Major concerns | very low | Serious Imprecision and Incoherence             |
| <b>SLREUTSINGLE:SRPLACIDBINFEFAE</b> | 0 | Some concerns | Low risk | No concerns   | Some concerns  | Some concerns | Major concerns | very low | Imprecision, Heterogeneity, Serious Incoherence |
| <b>SLREUTSINGLE:SSORALUBERRAT</b>    | 0 | No concerns   | Low risk | No concerns   | Major concerns | No concerns   | Major concerns | very low | Serious Imprecision and Incoherence             |
| <b>SBBIF:SLREUTSINGLE</b>            | 0 | Some concerns | Low risk | No concerns   | Major concerns | No concerns   | Major concerns | very low | Serious Imprecision and Incoherence             |
| <b>SFAECBUTBMESLSPO:SLREUTSINGLE</b> | 0 | No concerns   | Low risk | No concerns   | Major concerns | No concerns   | Major concerns | very low | Serious Imprecision and Incoherence             |
| <b>SLBREVIS:SLREUTSINGLE</b>         | 0 | No concerns   | Low risk | No concerns   | Major concerns | No concerns   | Major concerns | very low | Serious Imprecision and Incoherence             |
| <b>SLREUT:SLREUTSINGLE</b>           | 0 | No concerns   | Low risk | No concerns   | Some concerns  | Some concerns | Major concerns | very low | Imprecision, Heterogeneity, Serious Incoherence |
| <b>SLREUTSINGLE:SSBOU</b>            | 0 | No concerns   | Low risk | No concerns   | No concerns    | No concerns   | Major concerns | low      | Serious Incoherence                             |
| <b>SLRHAM:SLSPPBSP</b>               | 0 | No concerns   | Low risk | Some concerns | Major concerns | No concerns   | Major concerns | very low | Serious Imprecision and Incoherence             |
| <b>SLRHAM:SRP</b>                    | 0 | No concerns   | Low risk | Some concerns | Some concerns  | Some concerns | Major concerns | very low | Imprecision, Heterogeneity, Serious Incoherence |
| <b>SLRHAM:SRPLACIDBINFEFAE</b>       | 0 | Some concerns | Low risk | Some concerns | No concerns    | Some concerns | Major concerns | very low | Heterogeneity and serious Incoherence           |
| <b>SLRHAM:SSORALUBERRAT</b>          | 0 | No concerns   | Low risk | Some concerns | Major concerns | No concerns   | Major concerns | very low | Serious Imprecision and Incoherence             |
| <b>SBBIF:SLRHAM</b>                  | 0 | Some concerns | Low risk | No concerns   | Some concerns  | Some concerns | Major concerns | very low | Imprecision, Heterogeneity, Serious Incoherence |
| <b>SFAECBUTBMESLSPO:SLRHAM</b>       | 0 | No concerns   | Low risk | Some concerns | Some concerns  | Some concerns | Major concerns | very low | Imprecision, Heterogeneity, Serious Incoherence |

|                                    |   |               |          |               |                |               |                |          |                                                 |
|------------------------------------|---|---------------|----------|---------------|----------------|---------------|----------------|----------|-------------------------------------------------|
| <b>SLBREVIS:SLRHAM</b>             | 0 | No concerns   | Low risk | Some concerns | Major concerns | No concerns   | Major concerns | very low | Serious Imprecision and Incoherence             |
| <b>SLREUT:SLRHAM</b>               | 0 | No concerns   | Low risk | Some concerns | No concerns    | Some concerns | Major concerns | very low | Heterogeneity and serious Incoherence           |
| <b>SLREUTINCREM:SLRHAM</b>         | 0 | No concerns   | Low risk | No concerns   | Major concerns | No concerns   | Major concerns | very low | Serious Imprecision and Incoherence             |
| <b>SLRHAM:SSBOU</b>                | 0 | No concerns   | Low risk | No concerns   | No concerns    | No concerns   | Major concerns | low      | Serious Incoherence                             |
| <b>SLSPPBSPP:SRP</b>               | 0 | No concerns   | Low risk | No concerns   | Major concerns | No concerns   | Major concerns | very low | Serious Imprecision and Incoherence             |
| <b>SLSPPBSPP:SRPLACIDBIN FEFAE</b> | 0 | Some concerns | Low risk | No concerns   | Some concerns  | Some concerns | Major concerns | very low | Imprecision, Heterogeneity, Serious Incoherence |
| <b>SLSPPBSPP:SSORALUBERRAT</b>     | 0 | No concerns   | Low risk | Some concerns | Major concerns | No concerns   | Major concerns | very low | Serious Imprecision and Incoherence             |
| <b>SBBIF:SLSPPBSPP</b>             | 0 | Some concerns | Low risk | No concerns   | Major concerns | No concerns   | Major concerns | very low | Serious Imprecision and Incoherence             |
| <b>SFAECBUTBMESLSPO:SLSPBSPP</b>   | 0 | No concerns   | Low risk | No concerns   | Major concerns | No concerns   | Major concerns | very low | Serious Imprecision and Incoherence             |
| <b>SLBREVIS:SLSPPBSPP</b>          | 0 | No concerns   | Low risk | No concerns   | Major concerns | No concerns   | Major concerns | very low | Serious Imprecision and Incoherence             |
| <b>SLREUT:SLSPPBSPP</b>            | 0 | No concerns   | Low risk | No concerns   | No concerns    | Some concerns | Major concerns | very low | Heterogeneity and serious Incoherence           |
| <b>SLREUTINCREM:SLSPPBSPP</b>      | 0 | No concerns   | Low risk | No concerns   | Major concerns | No concerns   | Major concerns | very low | Serious Imprecision and Incoherence             |
| <b>SLSPPBSPP:SSBOU</b>             | 0 | No concerns   | Low risk | No concerns   | No concerns    | No concerns   | Major concerns | low      | Serious Incoherence                             |
| <b>SRP:SSORALUBERRAT</b>           | 0 | No concerns   | Low risk | Some concerns | Major concerns | No concerns   | Major concerns | very low | Serious Imprecision and Incoherence             |
| <b>SLBREVIS:SRP</b>                | 0 | No concerns   | Low risk | No concerns   | Major concerns | No concerns   | Major concerns | very low | Serious Imprecision and Incoherence             |
| <b>SLREUT:SRP</b>                  | 0 | No concerns   | Low risk | Some concerns | No concerns    | Some concerns | Major concerns | very low | Heterogeneity and serious Incoherence           |

|                                          |   |                |          |               |                |               |                |          |                                                 |
|------------------------------------------|---|----------------|----------|---------------|----------------|---------------|----------------|----------|-------------------------------------------------|
| <b>SLREUTINCREM:SRP</b>                  | 0 | No concerns    | Low risk | No concerns   | Major concerns | No concerns   | Major concerns | very low | Serious Imprecision and Incoherence             |
| <b>SPLAC:SRP</b>                         | 0 | No concerns    | Low risk | No concerns   | Some concerns  | Some concerns | Major concerns | very low | Imprecision, Heterogeneity, Serious Incoherence |
| <b>SRPLACIDBINFEFAE:SSORALUBERRAT</b>    | 0 | Some concerns  | Low risk | Some concerns | Some concerns  | No concerns   | Major concerns | very low | Imprecision, Serious Incoherence                |
| <b>SBBIF:SRPLACIDBINFEFAE</b>            | 0 | Major concerns | Low risk | Some concerns | Major concerns | No concerns   | Major concerns | very low | Serious Imprecision and Incoherence             |
| <b>SFAECBUTBMESLSPO:SRPLACIDBINFEFAE</b> | 0 | Major concerns | Low risk | Some concerns | Some concerns  | Some concerns | Major concerns | very low | Imprecision, Heterogeneity, Serious Incoherence |
| <b>SLBREVIS:SRPLACIDBINFEFAE</b>         | 0 | Some concerns  | Low risk | No concerns   | Some concerns  | Some concerns | Major concerns | very low | Imprecision, Heterogeneity, Serious Incoherence |
| <b>SLREUT:SRPLACIDBINFEFAE</b>           | 0 | Some concerns  | Low risk | Some concerns | Major concerns | No concerns   | Major concerns | very low | Serious Imprecision and Incoherence             |
| <b>SLREUTINCREM:SRPLACIDBINFEFAE</b>     | 0 | Some concerns  | Low risk | No concerns   | Some concerns  | Some concerns | Major concerns | very low | Imprecision, Heterogeneity, Serious Incoherence |
| <b>SPLAC:SRPLACIDBINFEFAE</b>            | 0 | Some concerns  | Low risk | Some concerns | No concerns    | Some concerns | Major concerns | very low | Heterogeneity and serious Incoherence           |
| <b>SRPLACIDBINFEFAE:SSBOU</b>            | 0 | Some concerns  | Low risk | Some concerns | Some concerns  | Some concerns | Major concerns | very low | Imprecision, Heterogeneity, Serious Incoherence |
| <b>SBBIF:SSORALUBERRAT</b>               | 0 | Some concerns  | Low risk | No concerns   | Major concerns | No concerns   | Major concerns | very low | Serious Imprecision and Incoherence             |
| <b>SFAECBUTBMESLSPO:SSORALUBERRAT</b>    | 0 | No concerns    | Low risk | Some concerns | Major concerns | No concerns   | Major concerns | very low | Serious Imprecision and Incoherence             |
| <b>SLBREVIS:SSORALUBERRAT</b>            | 0 | No concerns    | Low risk | Some concerns | Major concerns | No concerns   | Major concerns | very low | Serious Imprecision and Incoherence             |
| <b>SLREUT:SSORALUBERRAT</b>              | 0 | No concerns    | Low risk | Some concerns | No concerns    | Some concerns | Major concerns | very low | Heterogeneity and serious Incoherence           |
| <b>SLREUTINCREM:SSORALUBERRAT</b>        | 0 | No concerns    | Low risk | No concerns   | Major concerns | No concerns   | Major concerns | very low | Serious Imprecision and Incoherence             |
| <b>SSBOU:SSORALUBERRAT</b>               | 0 | No concerns    | Low risk | No concerns   | No concerns    | No concerns   | Major concerns | low      | Serious Incoherence                             |

|                                      |   |               |          |               |                |               |                |          |                                                 |
|--------------------------------------|---|---------------|----------|---------------|----------------|---------------|----------------|----------|-------------------------------------------------|
| <b>SBBIF:SFAECBUTBMESLSPO</b>        | 0 | Some concerns | Low risk | Some concerns | Major concerns | No concerns   | Major concerns | very low | Serious Imprecision and Incoherence             |
| <b>SBBIF:SLBREVIS</b>                | 0 | Some concerns | Low risk | No concerns   | Major concerns | No concerns   | Major concerns | very low | Serious Imprecision and Incoherence             |
| <b>SBBIF:SLREUT</b>                  | 0 | Some concerns | Low risk | No concerns   | Some concerns  | Some concerns | Major concerns | very low | Imprecision, Heterogeneity, Serious Incoherence |
| <b>SBBIF:SLREUTINCREM</b>            | 0 | Some concerns | Low risk | No concerns   | Major concerns | No concerns   | Major concerns | very low | Serious Imprecision and Incoherence             |
| <b>SBBIF:SPLAC</b>                   | 0 | Some concerns | Low risk | No concerns   | Some concerns  | Some concerns | Major concerns | very low | Imprecision, Heterogeneity, Serious Incoherence |
| <b>SBBIF:SSBOU</b>                   | 0 | Some concerns | Low risk | No concerns   | No concerns    | Some concerns | Major concerns | very low | Heterogeneity and serious Incoherence           |
| <b>SFAECBUTBMESLSPO:SLBREVIS</b>     | 0 | No concerns   | Low risk | No concerns   | Major concerns | No concerns   | Major concerns | very low | Serious Imprecision and Incoherence             |
| <b>SFAECBUTBMESLSPO:SLREUT</b>       | 0 | Some concerns | Low risk | Some concerns | Some concerns  | Some concerns | Major concerns | very low | Imprecision, Heterogeneity, Serious Incoherence |
| <b>SFAECBUTBMESLSPO:SLREUTINCREM</b> | 0 | No concerns   | Low risk | No concerns   | Major concerns | No concerns   | Major concerns | very low | Serious Imprecision and Incoherence             |
| <b>SFAECBUTBMESLSPO:SPLAC</b>        | 0 | Some concerns | Low risk | Some concerns | Some concerns  | Some concerns | Major concerns | very low | Imprecision, Heterogeneity, Serious Incoherence |
| <b>SFAECBUTBMESLSPO:SSBOU</b>        | 0 | Some concerns | Low risk | Some concerns | No concerns    | No concerns   | Major concerns | very low | Study limitations, Serious Incoherence          |
| <b>SLBREVIS:SLREUT</b>               | 0 | No concerns   | Low risk | No concerns   | No concerns    | Some concerns | Major concerns | very low | Heterogeneity and serious Incoherence           |
| <b>SLBREVIS:SLREUTINCREM</b>         | 0 | No concerns   | Low risk | No concerns   | Major concerns | No concerns   | Major concerns | very low | Serious Imprecision and Incoherence             |
| <b>SLBREVIS:SSBOU</b>                | 0 | No concerns   | Low risk | No concerns   | No concerns    | No concerns   | Major concerns | low      | Serious Incoherence                             |
| <b>SLREUT:SLREUTINCREM</b>           | 0 | No concerns   | Low risk | No concerns   | Some concerns  | No concerns   | Major concerns | very low | Imprecision, Serious Incoherence                |
| <b>SLREUT:SSBOU</b>                  | 0 | No concerns   | Low risk | No concerns   | Some concerns  | Some concerns | Major concerns | very low | Imprecision, Heterogeneity, Serious Incoherence |

|                           |   |             |          |             |             |             |                |     |                     |
|---------------------------|---|-------------|----------|-------------|-------------|-------------|----------------|-----|---------------------|
| <b>SLREUTINCREM:SSBOU</b> | 0 | No concerns | Low risk | No concerns | No concerns | No concerns | Major concerns | low | Serious Incoherence |
| <b>SPLAC:SSBOU</b>        | 0 | No concerns | Low risk | No concerns | No concerns | No concerns | Major concerns | low | Serious Incoherence |

Only for confidence rating ranging from 'very low' to 'moderate' the reasons for the downgrade were presented, since there were constraints in at least one of the six domains assessed by CInEMA.



Table 11 - CInEMA for the primary outcome “CAL”

| COMPARISON                          | NUMBER OF STUDIES | WITHIN-STUDY BIAS | REPORTING BIAS | INDIRECTNESS  | IMPRECISION    | HETEROGENEITY | INCOHERENCE    | CONFIDENCE RATING | REASON(S) FOR DOWNGRADING                     |
|-------------------------------------|-------------------|-------------------|----------------|---------------|----------------|---------------|----------------|-------------------|-----------------------------------------------|
| <b>MIXED EVIDENCE</b>               |                   |                   |                |               |                |               |                |                   |                                               |
| Lsposfaecbutb mes:Splac             | 1                 | Some concerns     | Low risk       | No concerns   | No concerns    | No concerns   | Some concerns  | low               | study limitations, incoherence                |
| <b>SBIFLACTT:SBIFLACTTG</b>         | 1                 | No concerns       | Low risk       | Some concerns | No concerns    | No concerns   | Some concerns  | low               | incoherence                                   |
| <b>SBIFLACTT:SCHX</b>               | 1                 | No concerns       | Low risk       | Some concerns | No concerns    | No concerns   | Some concerns  | low               | incoherence                                   |
| <b>SBIFLACTTG:SCHX</b>              | 1                 | No concerns       | Low risk       | Some concerns | No concerns    | No concerns   | Some concerns  | low               | incoherence                                   |
| <b>SBLACLACIDBBIFLRHAM :SPLAC</b>   | 1                 | No concerns       | Low risk       | No concerns   | No concerns    | Some concerns | Some concerns  | low               | incoherence                                   |
| <b>SBLACTDN:SPLAC</b>               | 1                 | No concerns       | Low risk       | No concerns   | Major concerns | No concerns   | Some concerns  | very low          | incoherence                                   |
| <b>SBLACTIS:SPLAC</b>               | 1                 | No concerns       | Low risk       | No concerns   | Some concerns  | Some concerns | Some concerns  | very low          | incoherence                                   |
| <b>SCHX:SRP</b>                     | 2                 | Major concerns    | Low risk       | Some concerns | Some concerns  | Some concerns | Some concerns  | very low          | serious study limitations, imprecision        |
| <b>SBBIF:SCHX</b>                   | 1                 | Some concerns     | Low risk       | No concerns   | Some concerns  | Some concerns | No concerns    | very low          | study limitations, imprecision, heterogeneity |
| <b>SLACIDLCASBBIFLRHAM LSAL:SRP</b> | 1                 | Some concerns     | Low risk       | Some concerns | Major concerns | No concerns   | Some concerns  | very low          | study limitations, incoherence                |
| <b>SLACIDLRHABLONGBO UL:SPLAC</b>   | 1                 | No concerns       | Low risk       | No concerns   | No concerns    | No concerns   | Some concerns  | moderate          | incoherence                                   |
| <b>SLBREVISEPLANT:SPLAC</b>         | 1                 | No concerns       | Low risk       | Some concerns | Major concerns | No concerns   | Some concerns  | very low          | serious imprecision, incoherence              |
| <b>SLCAS:SRP</b>                    | 1                 | Some concerns     | Some concerns  | No concerns   | No concerns    | No concerns   | Some concerns  | very low          | study limitations, incoherence                |
| <b>SLREUTD:SRP</b>                  | 2                 | Some concerns     | Low risk       | No concerns   | No concerns    | No concerns   | Major concerns | very low          | study limitations, incoherence                |

|                                   |   |               |               |               |                |                |               |          |                                          |
|-----------------------------------|---|---------------|---------------|---------------|----------------|----------------|---------------|----------|------------------------------------------|
| <b>SLREUTD:SPLAC</b>              | 1 | No concerns   | Low risk      | No concerns   | No concerns    | No concerns    | Some concerns | moderate | incoherence                              |
| <b>SLREUTDA:SRP</b>               | 1 | Some concerns | Low risk      | Some concerns | Major concerns | No concerns    | No concerns   | very low | study limitations, serious imprecision   |
| <b>SLREUTDA:SPLAC</b>             | 3 | No concerns   | Some concerns | No concerns   | No concerns    | Major concerns | No concerns   | very low | study limitations, serious heterogeneity |
| <b>SLREUTU:SRP</b>                | 1 | Some concerns | Low risk      | No concerns   | No concerns    | Major concerns | Some concerns | very low | study limitations, incoherence           |
| <b>SLREUTINCREM:SLREUT SINGLE</b> | 1 | No concerns   | Low risk      | No concerns   | Major concerns | No concerns    | Some concerns | very low | serious imprecision, incoherence         |
| <b>SLREUTSINGLE:SPLAC</b>         | 1 | No concerns   | Low risk      | No concerns   | Some concerns  | Some concerns  | Some concerns | very low | imprecision, incoherence                 |
| <b>SLRHAM:SPLAC</b>               | 3 | No concerns   | Low risk      | Some concerns | Major concerns | No concerns    | Some concerns | very low | serious imprecision, incoherence         |
| <b>SLSPPBSP:SPLAC</b>             | 2 | No concerns   | Some concerns | No concerns   | No concerns    | Major concerns | Some concerns | very low | serious heterogeneity, incoherence       |
| <b>SBBIF:SRP</b>                  | 1 | Some concerns | Low risk      | No concerns   | No concerns    | Some concerns  | No concerns   | low      | heterogeneity                            |
| <b>SFAECBUTBMESLSPO:SRP</b>       | 2 | Some concerns | Some concerns | Some concerns | No concerns    | Major concerns | Some concerns | very low | serious heterogeneity, incoherence       |
| <b>SRP:SSBOU</b>                  | 1 | No concerns   | Low risk      | No concerns   | No concerns    | No concerns    | Some concerns | moderate | incoherence                              |
| <b>SPLAC:SSORALUBERRAT</b>        | 1 | No concerns   | Low risk      | Some concerns | Major concerns | No concerns    | Some concerns | very low | serious imprecision, incoherence         |
| <b>SLBREVIS:SPLAC</b>             | 1 | No concerns   | Low risk      | No concerns   | Some concerns  | Some concerns  | Some concerns | very low | imprecision, heterogeneity, incoherence  |
| <b>SLREUT:SPLAC</b>               | 1 | No concerns   | Some concerns | No concerns   | No concerns    | Some concerns  | No concerns   | low      | heterogeneity                            |
| <b>SLREUTINCREM:SPLAC</b>         | 1 | No concerns   | Low risk      | No concerns   | No concerns    | Major concerns | Some concerns | very low | serious heterogeneity, incoherence       |

**INDIRECT EVIDENCE**

|                                                           |   |               |          |               |                |                |               |          |                                         |
|-----------------------------------------------------------|---|---------------|----------|---------------|----------------|----------------|---------------|----------|-----------------------------------------|
| <b>LSPOSFAECBUTBMES:SBI<br/>FLACTT</b>                    | 0 | Some concerns | Low risk | No concerns   | Major concerns | No concerns    | Some concerns | very low | serious imprecision, incoherence        |
| <b>LSPOSFAECBUTBMES:SBI<br/>FLACTTG</b>                   | 0 | Some concerns | Low risk | No concerns   | No concerns    | No concerns    | Some concerns | low      | study limitations, incoherence          |
| <b>LSPOSFAECBUTBMES:SB<br/>LACLACIDBBIFLRHAM</b>          | 0 | Some concerns | Low risk | No concerns   | Major concerns | No concerns    | Some concerns | very low | serious imprecision, incoherence        |
| <b>LSPOSFAECBUTBMES:SB<br/>LACTDN</b>                     | 0 | Some concerns | Low risk | No concerns   | No concerns    | Some concerns  | Some concerns | very low | heterogeneity, incoherence              |
| <b>LSPOSFAECBUTBMES:SB<br/>LACTIS</b>                     | 0 | Some concerns | Low risk | No concerns   | Some concerns  | Some concerns  | Some concerns | very low | imprecision, heterogeneity, incoherence |
| <b>LSPOSFAECBUTBMES:SC<br/>HX</b>                         | 0 | Some concerns | Low risk | No concerns   | Some concerns  | Some concerns  | Some concerns | very low | imprecision, heterogeneity, incoherence |
| <b>LSPOSFAECBUTBMES:SL<br/>ACIDLCASBBIFLRHAMLS<br/>AL</b> | 0 | Some concerns | Low risk | No concerns   | Some concerns  | Some concerns  | Some concerns | very low | imprecision, heterogeneity, incoherence |
| <b>LSPOSFAECBUTBMES:SL<br/>ACIDLRHABLONGBSBOUL</b>        | 0 | Some concerns | Low risk | No concerns   | Major concerns | No concerns    | Some concerns | very low | serious imprecision, incoherence        |
| <b>LSPOSFAECBUTBMES:SL<br/>BREVISEPLANT</b>               | 0 | Some concerns | Low risk | Some concerns | No concerns    | No concerns    | Some concerns | very low | study limitations, incoherence          |
| <b>LSPOSFAECBUTBMES:SL<br/>CAS</b>                        | 0 | Some concerns | Low risk | No concerns   | Major concerns | No concerns    | Some concerns | very low | study limitations, incoherence          |
| <b>LSPOSFAECBUTBMES:SL<br/>REUTD</b>                      | 0 | Some concerns | Low risk | No concerns   | Major concerns | No concerns    | Some concerns | very low | serious imprecision, incoherence        |
| <b>LSPOSFAECBUTBMES:SL<br/>REUTDA</b>                     | 0 | Some concerns | Low risk | No concerns   | No concerns    | Some concerns  | Some concerns | very low | study limitations, incoherence          |
| <b>LSPOSFAECBUTBMES:SL<br/>REUTU</b>                      | 0 | Some concerns | Low risk | No concerns   | Major concerns | No concerns    | Some concerns | very low | serious heterogeneity, incoherence      |
| <b>LSPOSFAECBUTBMES:SL<br/>REUTSINGLE</b>                 | 0 | No concerns   | Low risk | No concerns   | Some concerns  | Some concerns  | Some concerns | very low | imprecision, heterogeneity, incoherence |
| <b>LSPOSFAECBUTBMES:SL<br/>RHAM</b>                       | 0 | No concerns   | Low risk | Some concerns | No concerns    | No concerns    | Some concerns | low      | incoherence                             |
| <b>LSPOSFAECBUTBMES:SLS<br/>PPBSPP</b>                    | 0 | Some concerns | Low risk | No concerns   | No concerns    | Major concerns | Some concerns | very low | serious heterogeneity, incoherence      |

|                                           |   |               |          |               |                |               |               |          |                                               |
|-------------------------------------------|---|---------------|----------|---------------|----------------|---------------|---------------|----------|-----------------------------------------------|
| <b>LSPOSFAECBUTBMES:SRP</b>               | 0 | Some concerns | Low risk | No concerns   | No concerns    | Some concerns | Some concerns | very low | study limitations, heterogeneity, incoherence |
| <b>LSPOSFAECBUTBMES:SSORALUBERRAT</b>     | 0 | Some concerns | Low risk | Some concerns | No concerns    | No concerns   | Some concerns | very low | study limitations, incoherence                |
| <b>LSPOSFAECBUTBMES:SB BIF</b>            | 0 | Some concerns | Low risk | No concerns   | Major concerns | No concerns   | Some concerns | very low | serious imprecision, incoherence              |
| <b>LSPOSFAECBUTBMES:SF AECBUTBMESLSPO</b> | 0 | Some concerns | Low risk | No concerns   | Major concerns | No concerns   | Some concerns | very low | serious imprecision, incoherence              |
| <b>LSPOSFAECBUTBMES:SL BREVIS</b>         | 0 | Some concerns | Low risk | No concerns   | No concerns    | No concerns   | Some concerns | low      | study limitations, incoherence                |
| <b>LSPOSFAECBUTBMES:SL REUT</b>           | 0 | Some concerns | Low risk | No concerns   | Major concerns | No concerns   | Some concerns | very low | serious imprecision, incoherence              |
| <b>LSPOSFAECBUTBMES:SL REUTINCREM</b>     | 0 | No concerns   | Low risk | No concerns   | Major concerns | No concerns   | Some concerns | very low | serious imprecision, incoherence              |
| <b>LSPOSFAECBUTBMES:SSB OU</b>            | 0 | No concerns   | Low risk | No concerns   | No concerns    | No concerns   | Some concerns | moderate | incoherence                                   |
| <b>SBIFLACTT:SBLACLACID BBIFLRHAM</b>     | 0 | No concerns   | Low risk | No concerns   | No concerns    | Some concerns | Some concerns | low      | heterogeneity, incoherence                    |
| <b>SBIFLACTT:SBLACTDN</b>                 | 0 | No concerns   | Low risk | No concerns   | No concerns    | No concerns   | Some concerns | moderate | incoherence                                   |
| <b>SBIFLACTT:SBLACTIS</b>                 | 0 | No concerns   | Low risk | No concerns   | No concerns    | No concerns   | Some concerns | moderate | incoherence                                   |
| <b>SBIFLACTT:SLACIDLCAS BBIFLRHAMLSAL</b> | 0 | Some concerns | Low risk | Some concerns | No concerns    | No concerns   | Some concerns | very low | study limitations, incoherence                |
| <b>SBIFLACTT:SLACIDLRHA BLONGSBOUL</b>    | 0 | No concerns   | Low risk | No concerns   | Major concerns | No concerns   | Some concerns | very low | serious imprecision, incoherence              |
| <b>SBIFLACTT:SLBREVISEPL ANT</b>          | 0 | No concerns   | Low risk | Some concerns | No concerns    | No concerns   | Some concerns | low      | incoherence                                   |
| <b>SBIFLACTT:SLCAS</b>                    | 0 | Some concerns | Low risk | Some concerns | Major concerns | No concerns   | Some concerns | very low | serious imprecision, incoherence              |
| <b>SBIFLACTT:SLREUTD</b>                  | 0 | Some concerns | Low risk | Some concerns | Some concerns  | Some concerns | Some concerns | very low | imprecision, heterogeneity, incoherence       |

|                                       |   |               |          |               |                |               |               |          |                                               |
|---------------------------------------|---|---------------|----------|---------------|----------------|---------------|---------------|----------|-----------------------------------------------|
| <b>SBIFLACTT:SLREUTDA</b>             | 0 | Some concerns | Low risk | Some concerns | No concerns    | No concerns   | Some concerns | very low | study limitations, incoherence                |
| <b>SBIFLACTT:SLREUTU</b>              | 0 | Some concerns | Low risk | Some concerns | No concerns    | Some concerns | Some concerns | very low | study limitations, heterogeneity, incoherence |
| <b>SBIFLACTT:SLREUTSINGLE</b>         | 0 | No concerns   | Low risk | No concerns   | No concerns    | No concerns   | Some concerns | moderate | incoherence                                   |
| <b>SBIFLACTT:SLRHAM</b>               | 0 | No concerns   | Low risk | Some concerns | No concerns    | No concerns   | Some concerns | low      | incoherence                                   |
| <b>SBIFLACTT:SLSPBSPP</b>             | 0 | No concerns   | Low risk | No concerns   | No concerns    | No concerns   | Some concerns | moderate | incoherence                                   |
| <b>SBIFLACTT:SRP</b>                  | 0 | Some concerns | Low risk | Some concerns | No concerns    | No concerns   | Some concerns | very low | study limitations, incoherence                |
| <b>SBIFLACTT:SSORALUBERAT</b>         | 0 | No concerns   | Low risk | Some concerns | No concerns    | No concerns   | Some concerns | low      | incoherence                                   |
| <b>SBBIF:SBIFLACTT</b>                | 0 | Some concerns | Low risk | Some concerns | No concerns    | Some concerns | Some concerns | very low | heterogeneity, incoherence                    |
| <b>SBIFLACTT:SFAECBUTBMESLSPO</b>     | 0 | Some concerns | Low risk | Some concerns | No concerns    | Some concerns | Some concerns | very low | heterogeneity, incoherence                    |
| <b>SBIFLACTT:SLBREVIS</b>             | 0 | No concerns   | Low risk | No concerns   | No concerns    | No concerns   | Some concerns | moderate | incoherence                                   |
| <b>SBIFLACTT:SLREUT</b>               | 0 | Some concerns | Low risk | Some concerns | No concerns    | No concerns   | Some concerns | very low | study limitations, incoherence                |
| <b>SBIFLACTT:SLREUTINCREM</b>         | 0 | No concerns   | Low risk | No concerns   | No concerns    | Some concerns | Some concerns | low      | heterogeneity, incoherence                    |
| <b>SBIFLACTT:SPLAC</b>                | 0 | Some concerns | Low risk | Some concerns | No concerns    | No concerns   | Some concerns | very low | study limitations, incoherence                |
| <b>SBIFLACTT:SSBOU</b>                | 0 | Some concerns | Low risk | Some concerns | Major concerns | No concerns   | Some concerns | very low | study limitations, incoherence                |
| <b>SBIFLACTTG:SBLACLACIDBBIFLRHAM</b> | 0 | Some concerns | Low risk | No concerns   | No concerns    | No concerns   | Some concerns | low      | study limitations, incoherence                |
| <b>SBIFLACTTG:SBLACTDN</b>            | 0 | Some concerns | Low risk | No concerns   | No concerns    | No concerns   | Some concerns | low      | study limitations, incoherence                |

|                                               |   |               |          |               |             |             |               |          |                                |
|-----------------------------------------------|---|---------------|----------|---------------|-------------|-------------|---------------|----------|--------------------------------|
| <b>SBIFLACTTG:SBLACTIS</b>                    | 0 | Some concerns | Low risk | No concerns   | No concerns | No concerns | Some concerns | low      | study limitations, incoherence |
| <b>SBIFLACTTG:SLACIDLCA<br/>SBBIFLRHMLSAL</b> | 0 | Some concerns | Low risk | Some concerns | No concerns | No concerns | Some concerns | very low | study limitations, incoherence |
| <b>SBIFLACTTG:SLACIDLRH<br/>ABLONGBOUL</b>    | 0 | Some concerns | Low risk | No concerns   | No concerns | No concerns | Some concerns | low      | study limitations, incoherence |
| <b>SBIFLACTTG:SLBREVISE<br/>PLANT</b>         | 0 | Some concerns | Low risk | Some concerns | No concerns | No concerns | Some concerns | very low | study limitations, incoherence |
| <b>SBIFLACTTG:SLCAS</b>                       | 0 | Some concerns | Low risk | Some concerns | No concerns | No concerns | Some concerns | very low | study limitations, incoherence |
| <b>SBIFLACTTG:SLREUTD</b>                     | 0 | Some concerns | Low risk | Some concerns | No concerns | No concerns | Some concerns | very low | study limitations, incoherence |
| <b>SBIFLACTTG:SLREUTDA</b>                    | 0 | Some concerns | Low risk | Some concerns | No concerns | No concerns | Some concerns | very low | study limitations, incoherence |
| <b>SBIFLACTTG:SLREUTU</b>                     | 0 | Some concerns | Low risk | Some concerns | No concerns | No concerns | Some concerns | very low | study limitations, incoherence |
| <b>SBIFLACTTG:SLREUTSIN<br/>GLE</b>           | 0 | No concerns   | Low risk | No concerns   | No concerns | No concerns | Some concerns | moderate | incoherence                    |
| <b>SBIFLACTTG:SLRHAM</b>                      | 0 | No concerns   | Low risk | Some concerns | No concerns | No concerns | Some concerns | low      | incoherence                    |
| <b>SBIFLACTTG:SLSPPBSPP</b>                   | 0 | Some concerns | Low risk | No concerns   | No concerns | No concerns | Some concerns | low      | study limitations, incoherence |
| <b>SBIFLACTTG:SRP</b>                         | 0 | Some concerns | Low risk | Some concerns | No concerns | No concerns | Some concerns | very low | study limitations, incoherence |
| <b>SBIFLACTTG:SSORALUBE<br/>RRAT</b>          | 0 | Some concerns | Low risk | Some concerns | No concerns | No concerns | Some concerns | very low | study limitations, incoherence |
| <b>SBBIF:SBIFLACTTG</b>                       | 0 | Some concerns | Low risk | Some concerns | No concerns | No concerns | Some concerns | very low | study limitations, incoherence |
| <b>SBIFLACTTG:SFAECBUTB<br/>MESLSPO</b>       | 0 | Some concerns | Low risk | Some concerns | No concerns | No concerns | Some concerns | very low | study limitations, incoherence |
| <b>SBIFLACTTG:SLBREVIS</b>                    | 0 | Some concerns | Low risk | No concerns   | No concerns | No concerns | Some concerns | low      | study limitations, incoherence |

|                                                              |   |               |          |               |                   |                   |               |          |                                            |
|--------------------------------------------------------------|---|---------------|----------|---------------|-------------------|-------------------|---------------|----------|--------------------------------------------|
| <b>SBIFLACTTG:SLREUT</b>                                     | 0 | Some concerns | Low risk | Some concerns | No concerns       | No concerns       | Some concerns | very low | study limitations, incoherence             |
| <b>SBIFLACTTG:SLREUTINC<br/>REM</b>                          | 0 | No concerns   | Low risk | No concerns   | No concerns       | No concerns       | Some concerns | moderate | incoherence                                |
| <b>SBIFLACTTG:SPLAC</b>                                      | 0 | Some concerns | Low risk | Some concerns | No concerns       | No concerns       | Some concerns | very low | study limitations, incoherence             |
| <b>SBIFLACTTG:SSBOU</b>                                      | 0 | Some concerns | Low risk | Some concerns | Some concerns     | Some concerns     | Some concerns | very low | imprecision, heterogeneity,<br>incoherence |
| <b>SBLACLACIDBBIFLRHAM<br/>:SBLACTDN</b>                     | 0 | No concerns   | Low risk | No concerns   | Major<br>concerns | No concerns       | Some concerns | very low | serious imprecision, incoherence           |
| <b>SBLACLACIDBBIFLRHAM<br/>:SBLACTIS</b>                     | 0 | No concerns   | Low risk | No concerns   | Major<br>concerns | No concerns       | Some concerns | very low | serious imprecision, incoherence           |
| <b>SBLACLACIDBBIFLRHAM<br/>:SCHX</b>                         | 0 | Some concerns | Low risk | No concerns   | Major<br>concerns | No concerns       | Some concerns | very low | serious imprecision, incoherence           |
| <b>SBLACLACIDBBIFLRHAM<br/>:SLACIDLCASBBIFLRHAM<br/>LSAL</b> | 0 | No concerns   | Low risk | No concerns   | Major<br>concerns | No concerns       | Some concerns | very low | serious imprecision, incoherence           |
| <b>SBLACLACIDBBIFLRHAM<br/>:SLACIDLRHABLONGSBO<br/>UL</b>    | 0 | No concerns   | Low risk | No concerns   | No concerns       | No concerns       | Some concerns | moderate | incoherence                                |
| <b>SBLACLACIDBBIFLRHAM<br/>:SLBREVISEPLANT</b>               | 0 | No concerns   | Low risk | Some concerns | No concerns       | Major<br>concerns | Some concerns | very low | serious heterogeneity,<br>incoherence      |
| <b>SBLACLACIDBBIFLRHAM<br/>:SLCAS</b>                        | 0 | No concerns   | Low risk | No concerns   | Major<br>concerns | No concerns       | Some concerns | very low | serious imprecision, incoherence           |
| <b>SBLACLACIDBBIFLRHAM<br/>:SLREUTD</b>                      | 0 | No concerns   | Low risk | No concerns   | Major<br>concerns | No concerns       | Some concerns | very low | serious imprecision, incoherence           |
| <b>SBLACLACIDBBIFLRHAM<br/>:SLREUTDA</b>                     | 0 | No concerns   | Low risk | No concerns   | Major<br>concerns | No concerns       | Some concerns | very low | serious imprecision, incoherence           |
| <b>SBLACLACIDBBIFLRHAM<br/>:SLREUTU</b>                      | 0 | No concerns   | Low risk | No concerns   | Major<br>concerns | No concerns       | Some concerns | very low | serious imprecision, incoherence           |
| <b>SBLACLACIDBBIFLRHAM<br/>:SLREUTSINGLE</b>                 | 0 | No concerns   | Low risk | No concerns   | Major<br>concerns | No concerns       | Some concerns | very low | serious imprecision, incoherence           |
| <b>SBLACLACIDBBIFLRHAM<br/>:SLRHAM</b>                       | 0 | No concerns   | Low risk | Some concerns | No concerns       | Some concerns     | Some concerns | very low | heterogeneity, incoherence                 |

|                                             |   |               |          |               |                |                |               |          |                                    |
|---------------------------------------------|---|---------------|----------|---------------|----------------|----------------|---------------|----------|------------------------------------|
| <b>SBLACLACIDBBIFLRHAM:SLSPBSPP</b>         | 0 | No concerns   | Low risk | No concerns   | Major concerns | No concerns    | Some concerns | very low | serious imprecision, incoherence   |
| <b>SBLACLACIDBBIFLRHAM:SRP</b>              | 0 | No concerns   | Low risk | No concerns   | Major concerns | No concerns    | Some concerns | very low | serious imprecision, incoherence   |
| <b>SBLACLACIDBBIFLRHAM:SSORALUBERRAT</b>    | 0 | No concerns   | Low risk | Some concerns | No concerns    | Major concerns | Some concerns | very low | serious heterogeneity, incoherence |
| <b>SBBIF:SBLACLACIDBBIFLRHAM</b>            | 0 | Some concerns | Low risk | No concerns   | Major concerns | No concerns    | Some concerns | very low | serious imprecision, incoherence   |
| <b>SBLACLACIDBBIFLRHAM:SFAECBUTBMESLSPO</b> | 0 | No concerns   | Low risk | No concerns   | Major concerns | No concerns    | Some concerns | very low | serious imprecision, incoherence   |
| <b>SBLACLACIDBBIFLRHAM:SLBREVIS</b>         | 0 | No concerns   | Low risk | No concerns   | No concerns    | No concerns    | Some concerns | moderate | incoherence                        |
| <b>SBLACLACIDBBIFLRHAM:SLREUT</b>           | 0 | No concerns   | Low risk | No concerns   | Major concerns | No concerns    | Some concerns | very low | serious imprecision, incoherence   |
| <b>SBLACLACIDBBIFLRHAM:SLREUTINCREM</b>     | 0 | No concerns   | Low risk | No concerns   | Major concerns | No concerns    | Some concerns | very low | serious imprecision, incoherence   |
| <b>SBLACLACIDBBIFLRHAM:SSBOU</b>            | 0 | No concerns   | Low risk | No concerns   | No concerns    | No concerns    | Some concerns | moderate | incoherence                        |
| <b>SBLACTDN:SBLACTIS</b>                    | 0 | No concerns   | Low risk | No concerns   | Major concerns | No concerns    | Some concerns | very low | serious imprecision, incoherence   |
| <b>SBLACTDN:SCHX</b>                        | 0 | Some concerns | Low risk | No concerns   | Major concerns | No concerns    | Some concerns | very low | serious imprecision, incoherence   |
| <b>SBLACTDN:SLACIDLCASBIFLRHAMLSAL</b>      | 0 | No concerns   | Low risk | No concerns   | Major concerns | No concerns    | Some concerns | very low | serious imprecision, incoherence   |
| <b>SBLACTDN:SLACIDLRHABLONGBOUL</b>         | 0 | No concerns   | Low risk | No concerns   | No concerns    | No concerns    | Some concerns | moderate | incoherence                        |
| <b>SBLACTDN:SLBREVISEPLANT</b>              | 0 | No concerns   | Low risk | Some concerns | Major concerns | No concerns    | Some concerns | very low | serious imprecision, incoherence   |
| <b>SBLACTDN:SLCAS</b>                       | 0 | No concerns   | Low risk | No concerns   | No concerns    | Some concerns  | Some concerns | low      | heterogeneity, incoherence         |
| <b>SBLACTDN:SLREUTD</b>                     | 0 | No concerns   | Low risk | No concerns   | No concerns    | Some concerns  | Some concerns | low      | heterogeneity, incoherence         |



|                                             |   |               |          |               |                |               |               |          |                                            |
|---------------------------------------------|---|---------------|----------|---------------|----------------|---------------|---------------|----------|--------------------------------------------|
| <b>SBLACTDN:SLREUTDA</b>                    | 0 | No concerns   | Low risk | No concerns   | Major concerns | No concerns   | Some concerns | very low | serious imprecision, incoherence           |
| <b>SBLACTDN:SLREUTU</b>                     | 0 | No concerns   | Low risk | No concerns   | Major concerns | No concerns   | Some concerns | very low | serious imprecision, incoherence           |
| <b>SBLACTDN:SLREUTSINGLE</b>                | 0 | No concerns   | Low risk | No concerns   | Major concerns | No concerns   | Some concerns | very low | serious imprecision, incoherence           |
| <b>SBLACTDN:SLRHAM</b>                      | 0 | No concerns   | Low risk | Some concerns | Major concerns | No concerns   | Some concerns | very low | serious imprecision, incoherence           |
| <b>SBLACTDN:SLSPPBSPP</b>                   | 0 | No concerns   | Low risk | No concerns   | Major concerns | No concerns   | Some concerns | very low | serious imprecision, incoherence           |
| <b>SBLACTDN:SRP</b>                         | 0 | No concerns   | Low risk | No concerns   | Major concerns | No concerns   | Some concerns | very low | serious imprecision, incoherence           |
| <b>SBLACTDN:SSORALUBER<br/>RAT</b>          | 0 | No concerns   | Low risk | Some concerns | Major concerns | No concerns   | Some concerns | very low | serious imprecision, incoherence           |
| <b>SBBIF:SBLACTDN</b>                       | 0 | Some concerns | Low risk | No concerns   | Some concerns  | Some concerns | Some concerns | very low | imprecision, heterogeneity,<br>incoherence |
| <b>SBLACTDN:SFAECBUTBM<br/>ESLSPO</b>       | 0 | No concerns   | Low risk | No concerns   | Major concerns | No concerns   | Some concerns | very low | serious imprecision, incoherence           |
| <b>SBLACTDN:SLBREVIS</b>                    | 0 | No concerns   | Low risk | No concerns   | Some concerns  | Some concerns | Some concerns | very low | imprecision, heterogeneity,<br>incoherence |
| <b>SBLACTDN:SLREUT</b>                      | 0 | No concerns   | Low risk | No concerns   | Major concerns | No concerns   | Some concerns | very low | serious imprecision, incoherence           |
| <b>SBLACTDN:SLREUTINCR<br/>EM</b>           | 0 | No concerns   | Low risk | No concerns   | Major concerns | No concerns   | Some concerns | very low | serious imprecision, incoherence           |
| <b>SBLACTDN:SSBOU</b>                       | 0 | No concerns   | Low risk | No concerns   | No concerns    | No concerns   | Some concerns | moderate | incoherence                                |
| <b>SBLACTIS:SCHX</b>                        | 0 | Some concerns | Low risk | No concerns   | Major concerns | No concerns   | Some concerns | very low | serious imprecision, incoherence           |
| <b>SBLACTIS:SLACIDLCASB<br/>BIFLRHAMLAL</b> | 0 | No concerns   | Low risk | No concerns   | Major concerns | No concerns   | Some concerns | very low | serious imprecision, incoherence           |
| <b>SBLACTIS:SLACIDLRHAB<br/>LONGSBOUL</b>   | 0 | No concerns   | Low risk | No concerns   | No concerns    | No concerns   | Some concerns | moderate | incoherence                                |

|                                       |   |               |          |               |                |               |               |          |                                         |
|---------------------------------------|---|---------------|----------|---------------|----------------|---------------|---------------|----------|-----------------------------------------|
| <b>SBLACTIS:SLBREVIPLANT</b>          | 0 | No concerns   | Low risk | Some concerns | Some concerns  | Some concerns | Some concerns | very low | imprecision, heterogeneity, incoherence |
| <b>SBLACTIS:SLCAS</b>                 | 0 | No concerns   | Low risk | No concerns   | Some concerns  | Some concerns | Some concerns | very low | imprecision, heterogeneity, incoherence |
| <b>SBLACTIS:SLREUTD</b>               | 0 | No concerns   | Low risk | No concerns   | Some concerns  | Some concerns | Some concerns | very low | imprecision, heterogeneity, incoherence |
| <b>SBLACTIS:SLREUTDA</b>              | 0 | No concerns   | Low risk | No concerns   | Major concerns | No concerns   | Some concerns | very low | serious imprecision, incoherence        |
| <b>SBLACTIS:SLREUTU</b>               | 0 | No concerns   | Low risk | No concerns   | Major concerns | No concerns   | Some concerns | very low | serious imprecision, incoherence        |
| <b>SBLACTIS:SLREUTSINGLE</b>          | 0 | No concerns   | Low risk | No concerns   | Major concerns | No concerns   | Some concerns | very low | serious imprecision, incoherence        |
| <b>SBLACTIS:SLRHAM</b>                | 0 | No concerns   | Low risk | Some concerns | Some concerns  | Some concerns | Some concerns | very low | imprecision, heterogeneity, incoherence |
| <b>SBLACTIS:SLSPPBSPP</b>             | 0 | No concerns   | Low risk | No concerns   | Major concerns | No concerns   | Some concerns | very low | serious imprecision, incoherence        |
| <b>SBLACTIS:SRP</b>                   | 0 | No concerns   | Low risk | No concerns   | Major concerns | No concerns   | Some concerns | very low | serious imprecision, incoherence        |
| <b>SBLACTIS:SSORALUBERRAT</b>         | 0 | No concerns   | Low risk | Some concerns | Some concerns  | Some concerns | Some concerns | very low | imprecision, heterogeneity, incoherence |
| <b>SBBIF:SBLACTIS</b>                 | 0 | Some concerns | Low risk | No concerns   | Major concerns | No concerns   | Some concerns | very low | serious imprecision, incoherence        |
| <b>SBLACTIS:SFAECBUTBME<br/>SLSPO</b> | 0 | No concerns   | Low risk | No concerns   | Major concerns | No concerns   | Some concerns | very low | serious imprecision, incoherence        |
| <b>SBLACTIS:SLBREVIS</b>              | 0 | No concerns   | Low risk | No concerns   | No concerns    | Some concerns | Some concerns | low      | heterogeneity, incoherence              |
| <b>SBLACTIS:SLREUT</b>                | 0 | No concerns   | Low risk | No concerns   | Major concerns | No concerns   | Some concerns | very low | serious imprecision, incoherence        |
| <b>SBLACTIS:SLREUTINCREM</b>          | 0 | No concerns   | Low risk | No concerns   | Major concerns | No concerns   | Some concerns | very low | serious imprecision, incoherence        |
| <b>SBLACTIS:SSBOU</b>                 | 0 | No concerns   | Low risk | No concerns   | No concerns    | No concerns   | Some concerns | moderate | incoherence                             |

|                                  |   |               |          |               |                |                |               |          |                                         |
|----------------------------------|---|---------------|----------|---------------|----------------|----------------|---------------|----------|-----------------------------------------|
| <b>SCHX:SLACIDLCASBBIFLRHAML</b> | 0 | Some concerns | Low risk | Some concerns | Major concerns | No concerns    | Some concerns | very low | serious imprecision, incoherence        |
| <b>SCHX:SLACIDLRHABLONGSBOUL</b> | 0 | Some concerns | Low risk | No concerns   | No concerns    | No concerns    | Some concerns | low      | study limitations, incoherence          |
| <b>SCHX:SLBREVISEPLANT</b>       | 0 | Some concerns | Low risk | Some concerns | Some concerns  | Some concerns  | Some concerns | very low | imprecision, heterogeneity, incoherence |
| <b>SCHX:SLCAS</b>                | 0 | Some concerns | Low risk | No concerns   | No concerns    | Major concerns | Some concerns | very low | serious heterogeneity, incoherence      |
| <b>SCHX:SLREUTD</b>              | 0 | Some concerns | Low risk | No concerns   | No concerns    | Major concerns | Some concerns | very low | serious heterogeneity, incoherence      |
| <b>SCHX:SLREUTDA</b>             | 0 | Some concerns | Low risk | Some concerns | Major concerns | No concerns    | Some concerns | very low | serious imprecision, incoherence        |
| <b>SCHX:SLREUTU</b>              | 0 | Some concerns | Low risk | No concerns   | Major concerns | No concerns    | Some concerns | very low | serious imprecision, incoherence        |
| <b>SCHX:SLREUTSINGLE</b>         | 0 | Some concerns | Low risk | No concerns   | Major concerns | No concerns    | Some concerns | very low | serious imprecision, incoherence        |
| <b>SCHX:SLRHAM</b>               | 0 | Some concerns | Low risk | Some concerns | Some concerns  | Some concerns  | Some concerns | very low | imprecision, heterogeneity, incoherence |
| <b>SCHX:SLSPPBSPP</b>            | 0 | Some concerns | Low risk | No concerns   | Major concerns | No concerns    | Some concerns | very low | serious imprecision, incoherence        |
| <b>SCHX:SSORALUBERRAT</b>        | 0 | Some concerns | Low risk | Some concerns | Some concerns  | Some concerns  | Some concerns | very low | imprecision, heterogeneity, incoherence |
| <b>SCHX:SFAECBUTBMESLSPO</b>     | 0 | Some concerns | Low risk | Some concerns | Major concerns | No concerns    | Some concerns | very low | serious imprecision, incoherence        |
| <b>SCHX:SLBREVIS</b>             | 0 | Some concerns | Low risk | No concerns   | No concerns    | No concerns    | Some concerns | low      | study limitations, incoherence          |
| <b>SCHX:SLREUT</b>               | 0 | Some concerns | Low risk | Some concerns | Major concerns | No concerns    | Some concerns | very low | serious imprecision, incoherence        |
| <b>SCHX:SLREUTINCREM</b>         | 0 | Some concerns | Low risk | No concerns   | Major concerns | No concerns    | Some concerns | very low | serious imprecision, incoherence        |
| <b>SCHX:SPLAC</b>                | 0 | Some concerns | Low risk | No concerns   | Some concerns  | Some concerns  | Some concerns | very low | imprecision, heterogeneity, incoherence |

|                                                               |   |               |          |               |                |                |               |          |                                         |
|---------------------------------------------------------------|---|---------------|----------|---------------|----------------|----------------|---------------|----------|-----------------------------------------|
| <b>SCHX:SSBOU</b>                                             | 0 | Some concerns | Low risk | No concerns   | No concerns    | No concerns    | Some concerns | low      | study limitations, incoherence          |
| <b>SLACIDLCASBBIFLRHAM<br/>LSAL:SLACIDLRHABLON<br/>GSBOUL</b> | 0 | No concerns   | Low risk | No concerns   | No concerns    | No concerns    | Some concerns | moderate | incoherence                             |
| <b>SLACIDLCASBBIFLRHAM<br/>LSAL:SLBREVISEPLANT</b>            | 0 | No concerns   | Low risk | Some concerns | Major concerns | No concerns    | Some concerns | very low | serious imprecision, incoherence        |
| <b>SLACIDLCASBBIFLRHAM<br/>LSAL:SLCAS</b>                     | 0 | Some concerns | Low risk | Some concerns | Some concerns  | Some concerns  | Some concerns | very low | imprecision, heterogeneity, incoherence |
| <b>SLACIDLCASBBIFLRHAM<br/>LSAL:SLREUTD</b>                   | 0 | Some concerns | Low risk | No concerns   | No concerns    | Major concerns | Some concerns | very low | serious heterogeneity, incoherence      |
| <b>SLACIDLCASBBIFLRHAM<br/>LSAL:SLREUTDA</b>                  | 0 | Some concerns | Low risk | Some concerns | Major concerns | No concerns    | Some concerns | very low | serious imprecision, incoherence        |
| <b>SLACIDLCASBBIFLRHAM<br/>LSAL:SLREUTU</b>                   | 0 | Some concerns | Low risk | Some concerns | Major concerns | No concerns    | Some concerns | very low | serious imprecision, incoherence        |
| <b>SLACIDLCASBBIFLRHAM<br/>LSAL:SLREUTSINGLE</b>              | 0 | No concerns   | Low risk | No concerns   | Major concerns | No concerns    | Some concerns | very low | serious imprecision, incoherence        |
| <b>SLACIDLCASBBIFLRHAM<br/>LSAL:SLRHAM</b>                    | 0 | No concerns   | Low risk | Some concerns | Major concerns | No concerns    | Some concerns | very low | serious imprecision, incoherence        |
| <b>SLACIDLCASBBIFLRHAM<br/>LSAL:SLSPPBSPP</b>                 | 0 | No concerns   | Low risk | No concerns   | Major concerns | No concerns    | Some concerns | very low | serious imprecision, incoherence        |
| <b>SLACIDLCASBBIFLRHAM<br/>LSAL:SSORALUBERRAT</b>             | 0 | No concerns   | Low risk | Some concerns | Major concerns | No concerns    | Some concerns | very low | serious imprecision, incoherence        |
| <b>SBBIF:SLACIDLCASBBIFL<br/>RHAMLSAL</b>                     | 0 | Some concerns | Low risk | Some concerns | Major concerns | No concerns    | Some concerns | very low | serious imprecision, incoherence        |
| <b>SFAECBUTBMESLSPO:SL<br/>ACIDLCASBBIFLRHAMLS<br/>AL</b>     | 0 | Some concerns | Low risk | Some concerns | Major concerns | No concerns    | Some concerns | very low | serious imprecision, incoherence        |
| <b>SLACIDLCASBBIFLRHAM<br/>LSAL:SLBREVIS</b>                  | 0 | No concerns   | Low risk | No concerns   | No concerns    | Major concerns | Some concerns | very low | serious heterogeneity, incoherence      |
| <b>SLACIDLCASBBIFLRHAM<br/>LSAL:SLREUT</b>                    | 0 | Some concerns | Low risk | Some concerns | Major concerns | No concerns    | Some concerns | very low | serious imprecision, incoherence        |
| <b>SLACIDLCASBBIFLRHAM<br/>LSAL:SLREUTINCREM</b>              | 0 | No concerns   | Low risk | No concerns   | Major concerns | No concerns    | Some concerns | very low | serious imprecision, incoherence        |

|                                                  |   |               |          |               |                |                |               |          |                                         |
|--------------------------------------------------|---|---------------|----------|---------------|----------------|----------------|---------------|----------|-----------------------------------------|
| <b>SLACIDLCASBBIFLRHAM<br/>LSAL:SPLAC</b>        | 0 | Some concerns | Low risk | No concerns   | Major concerns | No concerns    | Some concerns | very low | serious imprecision, incoherence        |
| <b>SLACIDLCASBBIFLRHAM<br/>LSAL:SSBOU</b>        | 0 | Some concerns | Low risk | Some concerns | No concerns    | No concerns    | Some concerns | very low | study limitations, incoherence          |
| <b>SLACIDLRHABLONGBSBO<br/>UL:SLBREVISEPLANT</b> | 0 | No concerns   | Low risk | Some concerns | No concerns    | No concerns    | Some concerns | low      | incoherence                             |
| <b>SLACIDLRHABLONGBSBO<br/>UL:SLCAS</b>          | 0 | No concerns   | Low risk | No concerns   | Major concerns | No concerns    | Some concerns | very low | serious imprecision, incoherence        |
| <b>SLACIDLRHABLONGBSBO<br/>UL:SLREUTD</b>        | 0 | No concerns   | Low risk | No concerns   | Some concerns  | Some concerns  | Some concerns | very low | imprecision, heterogeneity, incoherence |
| <b>SLACIDLRHABLONGBSBO<br/>UL:SLREUTDA</b>       | 0 | No concerns   | Low risk | No concerns   | No concerns    | No concerns    | Some concerns | moderate | incoherence                             |
| <b>SLACIDLRHABLONGBSBO<br/>UL:SLREUTU</b>        | 0 | No concerns   | Low risk | No concerns   | No concerns    | Major concerns | Some concerns | very low | serious heterogeneity, incoherence      |
| <b>SLACIDLRHABLONGBSBO<br/>UL:SLREUTSINGLE</b>   | 0 | No concerns   | Low risk | No concerns   | No concerns    | No concerns    | Some concerns | moderate | incoherence                             |
| <b>SLACIDLRHABLONGBSBO<br/>UL:SLRHAM</b>         | 0 | No concerns   | Low risk | Some concerns | No concerns    | No concerns    | Some concerns | low      | incoherence                             |
| <b>SLACIDLRHABLONGBSBO<br/>UL:SLSPPBSPP</b>      | 0 | No concerns   | Low risk | No concerns   | No concerns    | No concerns    | Some concerns | moderate | incoherence                             |
| <b>SLACIDLRHABLONGBSBO<br/>UL:SRP</b>            | 0 | No concerns   | Low risk | No concerns   | No concerns    | No concerns    | Some concerns | moderate | incoherence                             |
| <b>SLACIDLRHABLONGBSBO<br/>UL:SSORALUBERRAT</b>  | 0 | No concerns   | Low risk | Some concerns | No concerns    | No concerns    | Some concerns | low      | incoherence                             |
| <b>SBBIF:SLACIDLRHABLON<br/>GSBOUL</b>           | 0 | Some concerns | Low risk | No concerns   | Some concerns  | Some concerns  | Some concerns | very low | heterogeneity, incoherence              |
| <b>SFAECBUTBMESLSPO:SL<br/>ACIDLRHABLONGBOUL</b> | 0 | No concerns   | Low risk | No concerns   | No concerns    | Major concerns | Some concerns | very low | serious heterogeneity, incoherence      |
| <b>SLACIDLRHABLONGBSBO<br/>UL:SLBREVIS</b>       | 0 | No concerns   | Low risk | No concerns   | No concerns    | No concerns    | Some concerns | moderate | incoherence                             |
| <b>SLACIDLRHABLONGBSBO<br/>UL:SLREUT</b>         | 0 | No concerns   | Low risk | No concerns   | No concerns    | Some concerns  | Some concerns | low      | heterogeneity, incoherence              |

|                                                |   |               |          |               |                |                |               |          |                                            |
|------------------------------------------------|---|---------------|----------|---------------|----------------|----------------|---------------|----------|--------------------------------------------|
| <b>SLACIDLRHABLONGBOSB<br/>UL:SLREUTINCREM</b> | 0 | No concerns   | Low risk | No concerns   | No concerns    | Some concerns  | Some concerns | low      | heterogeneity, incoherence                 |
| <b>SLACIDLRHABLONGBOSB<br/>UL:SSBOU</b>        | 0 | No concerns   | Low risk | No concerns   | Major concerns | No concerns    | Some concerns | very low | serious imprecision, incoherence           |
| <b>SLBREVISEPLANT:SLCAS</b>                    | 0 | No concerns   | Low risk | No concerns   | No concerns    | No concerns    | Some concerns | moderate | incoherence                                |
| <b>SLBREVISEPLANT:SLREU<br/>TD</b>             | 0 | No concerns   | Low risk | No concerns   | No concerns    | No concerns    | Some concerns | moderate | incoherence                                |
| <b>SLBREVISEPLANT:SLREU<br/>TDA</b>            | 0 | No concerns   | Low risk | Some concerns | Some concerns  | Some concerns  | Some concerns | very low | imprecision, heterogeneity,<br>incoherence |
| <b>SLBREVISEPLANT:SLREU<br/>TU</b>             | 0 | No concerns   | Low risk | No concerns   | No concerns    | Some concerns  | Some concerns | low      | incoherence                                |
| <b>SLBREVISEPLANT:SLREU<br/>TSINGLE</b>        | 0 | No concerns   | Low risk | No concerns   | Major concerns | No concerns    | Some concerns | very low | serious imprecision, incoherence           |
| <b>SLBREVISEPLANT:SLRHA<br/>M</b>              | 0 | No concerns   | Low risk | Some concerns | Major concerns | No concerns    | Some concerns | very low | serious imprecision, incoherence           |
| <b>SLBREVISEPLANT:SLSP<br/>BSP</b>             | 0 | No concerns   | Low risk | Some concerns | Some concerns  | Some concerns  | Some concerns | very low | imprecision, heterogeneity,<br>incoherence |
| <b>SLBREVISEPLANT:SRP</b>                      | 0 | No concerns   | Low risk | No concerns   | Major concerns | No concerns    | Some concerns | very low | serious imprecision, incoherence           |
| <b>SLBREVISEPLANT:SSORA<br/>LUBERRAT</b>       | 0 | No concerns   | Low risk | Some concerns | Major concerns | No concerns    | Some concerns | very low | serious imprecision, incoherence           |
| <b>SBBIF:SLBREVISEPLANT</b>                    | 0 | Some concerns | Low risk | No concerns   | No concerns    | Some concerns  | Some concerns | very low | heterogeneity, incoherence                 |
| <b>SFAECBUTBMESLSPO:SL<br/>BREVISEPLANT</b>    | 0 | No concerns   | Low risk | Some concerns | No concerns    | Some concerns  | Some concerns | very low | heterogeneity, incoherence                 |
| <b>SLBREVIS:SLBREVISEPLA<br/>NT</b>            | 0 | No concerns   | Low risk | Some concerns | Major concerns | No concerns    | Some concerns | very low | serious imprecision, incoherence           |
| <b>SLBREVISEPLANT:SLREU<br/>T</b>              | 0 | No concerns   | Low risk | Some concerns | No concerns    | Some concerns  | Some concerns | very low | heterogeneity, incoherence                 |
| <b>SLBREVISEPLANT:SLREU<br/>TINCREM</b>        | 0 | No concerns   | Low risk | No concerns   | No concerns    | Major concerns | Some concerns | very low | serious heterogeneity,<br>incoherence      |

|                               |   |               |          |               |                |                |               |          |                                               |
|-------------------------------|---|---------------|----------|---------------|----------------|----------------|---------------|----------|-----------------------------------------------|
| <b>SLBREVISEPLANT:SSBOU</b>   | 0 | No concerns   | Low risk | No concerns   | No concerns    | No concerns    | Some concerns | moderate | incoherence                                   |
| <b>SLCAS:SLREUTD</b>          | 0 | Some concerns | Low risk | No concerns   | Major concerns | No concerns    | Some concerns | very low | serious imprecision, incoherence              |
| <b>SLCAS:SLREUTDA</b>         | 0 | Some concerns | Low risk | No concerns   | No concerns    | Major concerns | Some concerns | very low | serious heterogeneity, incoherence            |
| <b>SLCAS:SLREUTU</b>          | 0 | Some concerns | Low risk | No concerns   | Major concerns | No concerns    | Some concerns | very low | serious imprecision, incoherence              |
| <b>SLCAS:SLREUTSINGLE</b>     | 0 | No concerns   | Low risk | No concerns   | Major concerns | No concerns    | Some concerns | very low | serious imprecision, incoherence              |
| <b>SLCAS:SLRHAM</b>           | 0 | No concerns   | Low risk | No concerns   | No concerns    | No concerns    | Some concerns | moderate | incoherence                                   |
| <b>SLCAS:SLSPPBSPP</b>        | 0 | No concerns   | Low risk | No concerns   | Some concerns  | Some concerns  | Some concerns | very low | imprecision, heterogeneity, incoherence       |
| <b>SLCAS:SSORALUBERRAT</b>    | 0 | No concerns   | Low risk | No concerns   | No concerns    | No concerns    | Some concerns | moderate | incoherence                                   |
| <b>SBBIF:SLCAS</b>            | 0 | Some concerns | Low risk | No concerns   | Major concerns | No concerns    | Some concerns | very low | serious imprecision, incoherence              |
| <b>SFAECBUTBMESLSPO:SLCAS</b> | 0 | Some concerns | Low risk | Some concerns | Major concerns | No concerns    | Some concerns | very low | serious imprecision, incoherence              |
| <b>SLBREVIS:SLCAS</b>         | 0 | No concerns   | Low risk | No concerns   | No concerns    | No concerns    | Some concerns | moderate | incoherence                                   |
| <b>SLCAS:SLREUT</b>           | 0 | Some concerns | Low risk | No concerns   | Major concerns | No concerns    | Some concerns | very low | serious imprecision, incoherence              |
| <b>SLCAS:SLREUTINCREM</b>     | 0 | No concerns   | Low risk | No concerns   | Major concerns | No concerns    | Some concerns | very low | serious imprecision, incoherence              |
| <b>SLCAS:SPLAC</b>            | 0 | Some concerns | Low risk | No concerns   | No concerns    | No concerns    | Some concerns | low      | study limitations, incoherence                |
| <b>SLCAS:SSBOU</b>            | 0 | Some concerns | Low risk | No concerns   | No concerns    | Some concerns  | Some concerns | very low | study limitations, heterogeneity, incoherence |
| <b>SLREUTD:SLREUTDA</b>       | 0 | Some concerns | Low risk | No concerns   | No concerns    | Some concerns  | Some concerns | very low | study limitations, heterogeneity, incoherence |

|                                 |   |               |          |               |                |                |               |          |                                         |
|---------------------------------|---|---------------|----------|---------------|----------------|----------------|---------------|----------|-----------------------------------------|
| <b>SLREUTD:SLREUTU</b>          | 0 | Some concerns | Low risk | No concerns   | Major concerns | No concerns    | Some concerns | very low | serious imprecision, incoherence        |
| <b>SLREUTD:SLREUTSINGLE</b>     | 0 | No concerns   | Low risk | No concerns   | Some concerns  | Some concerns  | Some concerns | very low | imprecision, heterogeneity, incoherence |
| <b>SLREUTD:SLRHAM</b>           | 0 | No concerns   | Low risk | No concerns   | No concerns    | No concerns    | Some concerns | moderate | incoherence                             |
| <b>SLREUTD:SLSPPBSPP</b>        | 0 | No concerns   | Low risk | No concerns   | No concerns    | Major concerns | Some concerns | very low | serious heterogeneity, incoherence      |
| <b>SLREUTD:SSORALUBERRAT</b>    | 0 | No concerns   | Low risk | No concerns   | No concerns    | No concerns    | Some concerns | moderate | incoherence                             |
| <b>SBBIF:SLREUTD</b>            | 0 | Some concerns | Low risk | No concerns   | Major concerns | No concerns    | Some concerns | very low | serious imprecision, incoherence        |
| <b>SFAECBUTBMESLSPO:SLREUTD</b> | 0 | Some concerns | Low risk | No concerns   | Major concerns | No concerns    | Some concerns | very low | serious imprecision, incoherence        |
| <b>SLBREVIS:SLREUTD</b>         | 0 | No concerns   | Low risk | No concerns   | No concerns    | No concerns    | Some concerns | moderate | incoherence                             |
| <b>SLREUT:SLREUTD</b>           | 0 | No concerns   | Low risk | No concerns   | Major concerns | No concerns    | Some concerns | very low | serious imprecision, incoherence        |
| <b>SLREUTD:SLREUTINCREM</b>     | 0 | No concerns   | Low risk | No concerns   | Major concerns | No concerns    | Some concerns | very low | serious imprecision, incoherence        |
| <b>SLREUTD:SSBOU</b>            | 0 | Some concerns | Low risk | No concerns   | No concerns    | No concerns    | Some concerns | low      | study limitations, incoherence          |
| <b>SLREUTDA:SLREUTU</b>         | 0 | Some concerns | Low risk | No concerns   | Major concerns | No concerns    | Some concerns | very low | serious imprecision, incoherence        |
| <b>SLREUTDA:SLREUTSINGLE</b>    | 0 | No concerns   | Low risk | No concerns   | Major concerns | No concerns    | Some concerns | very low | serious imprecision, incoherence        |
| <b>SLREUTDA:SLRHAM</b>          | 0 | No concerns   | Low risk | Some concerns | No concerns    | Major concerns | Some concerns | very low | serious heterogeneity, incoherence      |
| <b>SLREUTDA:SLSPPBSPP</b>       | 0 | No concerns   | Low risk | No concerns   | Major concerns | No concerns    | Some concerns | very low | serious imprecision, incoherence        |
| <b>SLREUTDA:SSORALUBERRAT</b>   | 0 | No concerns   | Low risk | Some concerns | Some concerns  | Some concerns  | Some concerns | very low | imprecision, heterogeneity, incoherence |



|                                  |   |               |          |               |                |               |               |          |                                         |
|----------------------------------|---|---------------|----------|---------------|----------------|---------------|---------------|----------|-----------------------------------------|
| <b>SBBIF:SLREUTDA</b>            | 0 | Some concerns | Low risk | No concerns   | Some concerns  | Some concerns | Some concerns | very low | imprecision, heterogeneity, incoherence |
| <b>SFAECBUTBMESLSPO:SLREUTDA</b> | 0 | Some concerns | Low risk | Some concerns | Major concerns | No concerns   | Some concerns | very low | serious imprecision, incoherence        |
| <b>SLBREVIS:SLREUTDA</b>         | 0 | No concerns   | Low risk | No concerns   | No concerns    | No concerns   | Some concerns | moderate | incoherence                             |
| <b>SLREUT:SLREUTDA</b>           | 0 | No concerns   | Low risk | No concerns   | Major concerns | No concerns   | Some concerns | very low | serious imprecision, incoherence        |
| <b>SLREUTDA:SLREUTINCREM</b>     | 0 | No concerns   | Low risk | No concerns   | Major concerns | No concerns   | Some concerns | very low | serious imprecision, incoherence        |
| <b>SLREUTDA:SSBOU</b>            | 0 | No concerns   | Low risk | No concerns   | No concerns    | No concerns   | Some concerns | moderate | incoherence                             |
| <b>SLREUTSINGLE:SLREUTU</b>      | 0 | No concerns   | Low risk | No concerns   | Major concerns | No concerns   | Some concerns | very low | serious imprecision, incoherence        |
| <b>SLREUTU:SLRHAM</b>            | 0 | No concerns   | Low risk | No concerns   | No concerns    | Some concerns | Some concerns | low      | incoherence                             |
| <b>SLREUTU:SLSPBSP</b>           | 0 | No concerns   | Low risk | No concerns   | Major concerns | No concerns   | Some concerns | very low | serious imprecision, incoherence        |
| <b>SLREUTU:SSORALUBERRAT</b>     | 0 | No concerns   | Low risk | No concerns   | No concerns    | Some concerns | Some concerns | low      | heterogeneity, incoherence              |
| <b>SBBIF:SLREUTU</b>             | 0 | Some concerns | Low risk | No concerns   | Major concerns | No concerns   | Some concerns | very low | serious imprecision, incoherence        |
| <b>SFAECBUTBMESLSPO:SLREUTU</b>  | 0 | Some concerns | Low risk | Some concerns | Major concerns | No concerns   | Some concerns | very low | serious imprecision, incoherence        |
| <b>SLBREVIS:SLREUTU</b>          | 0 | No concerns   | Low risk | No concerns   | No concerns    | No concerns   | Some concerns | moderate | incoherence                             |
| <b>SLREUT:SLREUTU</b>            | 0 | Some concerns | Low risk | No concerns   | Major concerns | No concerns   | Some concerns | very low | serious imprecision, incoherence        |
| <b>SLREUTINCREM:SLREUTU</b>      | 0 | No concerns   | Low risk | No concerns   | Major concerns | No concerns   | Some concerns | very low | serious imprecision, incoherence        |
| <b>SLREUTU:SPLAC</b>             | 0 | Some concerns | Low risk | No concerns   | No concerns    | Some concerns | Some concerns | very low | serious heterogeneity, incoherence      |

|                                      |   |               |          |               |                |                |               |          |                                         |
|--------------------------------------|---|---------------|----------|---------------|----------------|----------------|---------------|----------|-----------------------------------------|
| <b>SLREUTU:SSBOU</b>                 | 0 | Some concerns | Low risk | No concerns   | No concerns    | No concerns    | Some concerns | low      | study limitations, incoherence          |
| <b>SLREUTSINGLE:SLRHAM</b>           | 0 | No concerns   | Low risk | No concerns   | Some concerns  | Some concerns  | Some concerns | very low | imprecision, heterogeneity, incoherence |
| <b>SLREUTSINGLE:SLSPBPSP</b>         | 0 | No concerns   | Low risk | No concerns   | Major concerns | No concerns    | Some concerns | very low | serious imprecision, incoherence        |
| <b>SLREUTSINGLE:SRP</b>              | 0 | No concerns   | Low risk | No concerns   | Major concerns | No concerns    | Some concerns | very low | serious imprecision, incoherence        |
| <b>SLREUTSINGLE:SSORALUBERRAT</b>    | 0 | No concerns   | Low risk | No concerns   | Major concerns | No concerns    | Some concerns | very low | serious imprecision, incoherence        |
| <b>SBBIF:SLREUTSINGLE</b>            | 0 | Some concerns | Low risk | No concerns   | Major concerns | No concerns    | Some concerns | very low | serious imprecision, incoherence        |
| <b>SFAECBUTBMESLSPO:SLREUTSINGLE</b> | 0 | No concerns   | Low risk | No concerns   | Major concerns | No concerns    | Some concerns | very low | serious imprecision, incoherence        |
| <b>SLBREVIS:SLREUTSINGLE</b>         | 0 | No concerns   | Low risk | No concerns   | No concerns    | Some concerns  | Some concerns | low      | heterogeneity, incoherence              |
| <b>SLREUT:SLREUTSINGLE</b>           | 0 | No concerns   | Low risk | No concerns   | Major concerns | No concerns    | Some concerns | very low | serious imprecision, incoherence        |
| <b>SLREUTSINGLE:SSBOU</b>            | 0 | No concerns   | Low risk | No concerns   | No concerns    | No concerns    | Some concerns | moderate | incoherence                             |
| <b>SLRHAM:SLSPBPSP</b>               | 0 | No concerns   | Low risk | Some concerns | No concerns    | Major concerns | Some concerns | very low | serious heterogeneity, incoherence      |
| <b>SLRHAM:SRP</b>                    | 0 | No concerns   | Low risk | Some concerns | Some concerns  | Some concerns  | Some concerns | very low | imprecision, heterogeneity, incoherence |
| <b>SLRHAM:SSORALUBERRAT</b>          | 0 | No concerns   | Low risk | Some concerns | Major concerns | No concerns    | Some concerns | very low | serious imprecision, incoherence        |
| <b>SBBIF:SLRHAM</b>                  | 0 | Some concerns | Low risk | No concerns   | No concerns    | No concerns    | Some concerns | low      | study limitations, incoherence          |
| <b>SFAECBUTBMESLSPO:SLRHAM</b>       | 0 | No concerns   | Low risk | Some concerns | No concerns    | Some concerns  | Some concerns | very low | heterogeneity, incoherence              |
| <b>SLBREVIS:SLRHAM</b>               | 0 | No concerns   | Low risk | Some concerns | Major concerns | No concerns    | Some concerns | very low | serious imprecision, incoherence        |

|                                   |   |               |          |               |                |                |               |          |                                         |
|-----------------------------------|---|---------------|----------|---------------|----------------|----------------|---------------|----------|-----------------------------------------|
| <b>SLREUT:SLRHAM</b>              | 0 | No concerns   | Low risk | Some concerns | No concerns    | Some concerns  | Some concerns | very low | heterogeneity, incoherence              |
| <b>SLREUTINCREM:SLRHAM</b>        | 0 | No concerns   | Low risk | No concerns   | No concerns    | Major concerns | Some concerns | very low | serious heterogeneity, incoherence      |
| <b>SLRHAM:SSBOU</b>               | 0 | No concerns   | Low risk | No concerns   | No concerns    | No concerns    | Some concerns | moderate | incoherence                             |
| <b>SLSPPBSPP:SRP</b>              | 0 | No concerns   | Low risk | No concerns   | Major concerns | No concerns    | Some concerns | very low | serious imprecision, incoherence        |
| <b>SLSPPBSPP:SSORALUBERRAT</b>    | 0 | No concerns   | Low risk | Some concerns | Some concerns  | Some concerns  | Some concerns | very low | imprecision, heterogeneity, incoherence |
| <b>SBBIF:SLSPPBSPP</b>            | 0 | Some concerns | Low risk | No concerns   | Major concerns | No concerns    | Some concerns | very low | serious imprecision, incoherence        |
| <b>SFAECBUTBMESLSPO:SLSPPBSPP</b> | 0 | No concerns   | Low risk | No concerns   | Major concerns | No concerns    | Some concerns | very low | serious imprecision, incoherence        |
| <b>SLBREVIS:SLSPPBSPP</b>         | 0 | No concerns   | Low risk | No concerns   | No concerns    | No concerns    | Some concerns | moderate | incoherence                             |
| <b>SLREUT:SLSPPBSPP</b>           | 0 | No concerns   | Low risk | No concerns   | Major concerns | No concerns    | Some concerns | very low | serious imprecision, incoherence        |
| <b>SLREUTINCREM:SLSPPBSPP</b>     | 0 | No concerns   | Low risk | No concerns   | Major concerns | No concerns    | Some concerns | very low | serious imprecision, incoherence        |
| <b>SLSPPBSPP:SSBOU</b>            | 0 | No concerns   | Low risk | No concerns   | No concerns    | No concerns    | Some concerns | moderate | incoherence                             |
| <b>SRP:SSORALUBERRAT</b>          | 0 | No concerns   | Low risk | No concerns   | Major concerns | No concerns    | Some concerns | very low | serious imprecision, incoherence        |
| <b>SLBREVIS:SRP</b>               | 0 | No concerns   | Low risk | No concerns   | No concerns    | Some concerns  | Some concerns | low      | heterogeneity, incoherence              |
| <b>SLREUT:SRP</b>                 | 0 | No concerns   | Low risk | Some concerns | Some concerns  | Some concerns  | Some concerns | very low | imprecision, heterogeneity, incoherence |
| <b>SLREUTINCREM:SRP</b>           | 0 | No concerns   | Low risk | No concerns   | Major concerns | No concerns    | Some concerns | very low | serious imprecision, incoherence        |
| <b>SPLAC:SRP</b>                  | 0 | No concerns   | Low risk | No concerns   | Some concerns  | Some concerns  | Some concerns | very low | imprecision, heterogeneity, incoherence |

|                                       |   |               |          |               |                |                |               |          |                                         |
|---------------------------------------|---|---------------|----------|---------------|----------------|----------------|---------------|----------|-----------------------------------------|
| <b>SBBIF:SSORALUBERRAT</b>            | 0 | Some concerns | Low risk | No concerns   | No concerns    | Some concerns  | Some concerns | very low | heterogeneity, incoherence              |
| <b>SFAECBUTBMESLSPO:SSORALUBERRAT</b> | 0 | No concerns   | Low risk | Some concerns | No concerns    | Major concerns | Some concerns | very low | serious heterogeneity, incoherence      |
| <b>SLBREVIS:SSORALUBERRAT</b>         | 0 | No concerns   | Low risk | Some concerns | Major concerns | No concerns    | Some concerns | very low | serious imprecision, incoherence        |
| <b>SLREUT:SSORALUBERRAT</b>           | 0 | No concerns   | Low risk | Some concerns | No concerns    | Some concerns  | Some concerns | very low | imprecision, heterogeneity, incoherence |
| <b>SLREUTINCREM:SSORALUBERRAT</b>     | 0 | No concerns   | Low risk | No concerns   | Some concerns  | Some concerns  | Some concerns | very low | imprecision, heterogeneity, incoherence |
| <b>SSBOU:SSORALUBERRAT</b>            | 0 | No concerns   | Low risk | No concerns   | No concerns    | No concerns    | Some concerns | moderate | incoherence                             |
| <b>SBBIF:SFAECBUTBMESLSPO</b>         | 0 | Some concerns | Low risk | Some concerns | Major concerns | No concerns    | Some concerns | very low | serious imprecision, incoherence        |
| <b>SBBIF:SLBREVIS</b>                 | 0 | Some concerns | Low risk | No concerns   | No concerns    | No concerns    | Some concerns | low      | study limitations, incoherence          |
| <b>SBBIF:SLREUT</b>                   | 0 | Some concerns | Low risk | No concerns   | Major concerns | No concerns    | Some concerns | very low | serious imprecision, incoherence        |
| <b>SBBIF:SLREUTINCREM</b>             | 0 | Some concerns | Low risk | No concerns   | Major concerns | No concerns    | Some concerns | very low | serious imprecision, incoherence        |
| <b>SBBIF:SPLAC</b>                    | 0 | Some concerns | Low risk | No concerns   | No concerns    | No concerns    | Some concerns | low      | study limitations, incoherence          |
| <b>SBBIF:SSBOU</b>                    | 0 | Some concerns | Low risk | No concerns   | No concerns    | No concerns    | Some concerns | low      | study limitations, incoherence          |
| <b>SFAECBUTBMESLSPO:SLBREVIS</b>      | 0 | No concerns   | Low risk | No concerns   | No concerns    | No concerns    | Some concerns | moderate | incoherence                             |
| <b>SFAECBUTBMESLSPO:SLREUT</b>        | 0 | Some concerns | Low risk | Some concerns | Major concerns | No concerns    | Some concerns | very low | serious imprecision, incoherence        |
| <b>SFAECBUTBMESLSPO:SLREUTINCREM</b>  | 0 | No concerns   | Low risk | No concerns   | Major concerns | No concerns    | Some concerns | very low | serious imprecision, incoherence        |
| <b>SFAECBUTBMESLSPO:SPLAC</b>         | 0 | Some concerns | Low risk | No concerns   | No concerns    | Some concerns  | Some concerns | very low | heterogeneity, incoherence              |

|                               |   |               |          |               |                |             |               |          |                                  |
|-------------------------------|---|---------------|----------|---------------|----------------|-------------|---------------|----------|----------------------------------|
| <b>SFAECBUTBMESLSPO:SSBOU</b> | 0 | Some concerns | Low risk | Some concerns | No concerns    | No concerns | Some concerns | very low | study limitations, incoherence   |
| <b>SLBREVIS:SLREUT</b>        | 0 | No concerns   | Low risk | No concerns   | No concerns    | No concerns | Some concerns | moderate | incoherence                      |
| <b>SLBREVIS:SLREUTINCREM</b>  | 0 | No concerns   | Low risk | No concerns   | No concerns    | No concerns | Some concerns | moderate | incoherence                      |
| <b>SLBREVIS:SSBOU</b>         | 0 | No concerns   | Low risk | No concerns   | No concerns    | No concerns | Some concerns | moderate | incoherence                      |
| <b>SLREUT:SLREUTINCREM</b>    | 0 | No concerns   | Low risk | No concerns   | Major concerns | No concerns | Some concerns | very low | serious imprecision, incoherence |
| <b>SLREUT:SSBOU</b>           | 0 | No concerns   | Low risk | No concerns   | No concerns    | No concerns | Some concerns | moderate | incoherence                      |
| <b>SLREUTINCREM:SSBOU</b>     | 0 | No concerns   | Low risk | No concerns   | No concerns    | No concerns | Some concerns | moderate | incoherence                      |
| <b>SPLAC:SSBOU</b>            | 0 | No concerns   | Low risk | No concerns   | No concerns    | No concerns | Some concerns | moderate | incoherence                      |

Only for confidence rating ranging from 'very low' to 'moderate' the reasons for the downgrade were presented, since there were constraints in at least one of the six domains assessed by CINeMA.

Table 12 - CIneMA for the secondary outcome “BOP”

| COMPARISON                          | NUMBER OF STUDIES | WITHIN-STUDY BIAS | REPORTING BIAS | INDIRECTNESS  | IMPRECISION    | HETEROGENEITY  | INCOHERENCE    | CONFIDENCE RATING | REASON(S) FOR DOWNGRADING                   |
|-------------------------------------|-------------------|-------------------|----------------|---------------|----------------|----------------|----------------|-------------------|---------------------------------------------|
| <b>MIXED EVIDENCE</b>               |                   |                   |                |               |                |                |                |                   |                                             |
| <b>SBLACLACIDBBIFLRHAM :SPLAC</b>   | 1                 | No concerns       | Low risk       | No concerns   | Major concerns | No concerns    | Major concerns | very low          | serious imprecision and incoherence         |
| <b>SBLACTDN:SPLAC</b>               | 1                 | No concerns       | Low risk       | No concerns   | No concerns    | Major concerns | Major concerns | very low          | serious heterogeneity and incoherence       |
| <b>SBLACTIS:SPLAC</b>               | 2                 | No concerns       | Low risk       | No concerns   | Major concerns | No concerns    | Major concerns | very low          | serious imprecision and incoherence         |
| <b>SLACIDLCASBBIFLRHAM LSAL:SRP</b> | 1                 | Some concerns     | Low risk       | Some concerns | Major concerns | No concerns    | Major concerns | very low          | serious imprecision and incoherence         |
| <b>SLBREWISEPLANT:SPLAC</b>         | 1                 | No concerns       | Low risk       | Some concerns | Major concerns | No concerns    | Major concerns | very low          | serious imprecision and incoherence         |
| <b>SLREUTAA:SPLAC</b>               | 1                 | No concerns       | Low risk       | No concerns   | No concerns    | No concerns    | Major concerns | low               | serious incoherence                         |
| <b>SLREUTD:SRP</b>                  | 1                 | Some concerns     | Low risk       | No concerns   | No concerns    | Major concerns | No concerns    | very low          | study limitations and serious heterogeneity |
| <b>SLREUTD:SPLAC</b>                | 1                 | No concerns       | Low risk       | No concerns   | Major concerns | No concerns    | No concerns    | low               | serious imprecision                         |
| <b>SLREUTDA:SRP</b>                 | 1                 | Some concerns     | Low risk       | Some concerns | No concerns    | No concerns    | Major concerns | very low          | study limitations, serious incoherence      |
| <b>SLREUTDA:SPLAC</b>               | 3                 | No concerns       | Some concerns  | No concerns   | No concerns    | Major concerns | Some concerns  | very low          | serious heterogeneity                       |
| <b>SLREUTINCREM:SLREUT SINGLE</b>   | 1                 | No concerns       | Low risk       | No concerns   | Major concerns | No concerns    | Major concerns | very low          | serious imprecision and incoherence         |
| <b>SLREUTSINGLE:SPLAC</b>           | 1                 | No concerns       | Low risk       | No concerns   | No concerns    | No concerns    | Major concerns | low               | serious incoherence                         |
| <b>SLRHAM:SPLAC</b>                 | 3                 | No concerns       | Low risk       | Some concerns | Major concerns | No concerns    | Major concerns | very low          | serious imprecision and incoherence         |
| <b>SLSPPBSPP:SPLAC</b>              | 2                 | No concerns       | Some concerns  | No concerns   | Major concerns | No concerns    | Major concerns | very low          | serious imprecision and incoherence         |

|                                                      |   |             |               |               |                |               |                |          |                                                 |
|------------------------------------------------------|---|-------------|---------------|---------------|----------------|---------------|----------------|----------|-------------------------------------------------|
| <b>SPLAC:SSORALUBERRAT</b>                           | 1 | No concerns | Low risk      | Some concerns | Major concerns | No concerns   | Major concerns | very low | serious imprecision and incoherence             |
| <b>SLREUT:SPLAC</b>                                  | 1 | No concerns | Some concerns | No concerns   | No concerns    | No concerns   | Major concerns | very low | serious incoherence                             |
| <b>SLREUTINCREM:SPLAC</b>                            | 1 | No concerns | Low risk      | No concerns   | No concerns    | No concerns   | Major concerns | low      | serious incoherence                             |
| <b>INDIRECT EVIDENCE</b>                             |   |             |               |               |                |               |                |          |                                                 |
| <b>SBLACLACIDBBIFLRHAM :SBLACTDN</b>                 | 0 | No concerns | Low risk      | No concerns   | Major concerns | No concerns   | Major concerns | very low | serious imprecision and incoherence             |
| <b>SBLACLACIDBBIFLRHAM :SBLACTIS</b>                 | 0 | No concerns | Low risk      | No concerns   | Major concerns | No concerns   | Major concerns | very low | serious imprecision and incoherence             |
| <b>SBLACLACIDBBIFLRHAM :SLACIDLCASBBIFLRHAM LSAL</b> | 0 | No concerns | Low risk      | No concerns   | Major concerns | No concerns   | Major concerns | very low | serious imprecision and incoherence             |
| <b>SBLACLACIDBBIFLRHAM :SLBREVISEPLANT</b>           | 0 | No concerns | Low risk      | Some concerns | Major concerns | No concerns   | Major concerns | very low | serious imprecision and incoherence             |
| <b>SBLACLACIDBBIFLRHAM :SLREUTAA</b>                 | 0 | No concerns | Low risk      | No concerns   | No concerns    | No concerns   | Major concerns | low      | serious incoherence                             |
| <b>SBLACLACIDBBIFLRHAM :SLREUTD</b>                  | 0 | No concerns | Low risk      | No concerns   | Major concerns | No concerns   | Major concerns | very low | serious imprecision and incoherence             |
| <b>SBLACLACIDBBIFLRHAM :SLREUTDA</b>                 | 0 | No concerns | Low risk      | No concerns   | Major concerns | No concerns   | Major concerns | very low | serious imprecision and incoherence             |
| <b>SBLACLACIDBBIFLRHAM :SLREUTSINGLE</b>             | 0 | No concerns | Low risk      | No concerns   | Major concerns | No concerns   | Major concerns | very low | serious imprecision and incoherence             |
| <b>SBLACLACIDBBIFLRHAM :SLRHAM</b>                   | 0 | No concerns | Low risk      | Some concerns | Major concerns | No concerns   | Major concerns | very low | serious imprecision and incoherence             |
| <b>SBLACLACIDBBIFLRHAM :SLSPPBSPP</b>                | 0 | No concerns | Low risk      | No concerns   | Major concerns | No concerns   | Major concerns | very low | serious imprecision and incoherence             |
| <b>SBLACLACIDBBIFLRHAM :SRP</b>                      | 0 | No concerns | Low risk      | No concerns   | Some concerns  | Some concerns | Major concerns | very low | imprecision, heterogeneity, serious incoherence |
| <b>SBLACLACIDBBIFLRHAM :SSORALUBERRAT</b>            | 0 | No concerns | Low risk      | Some concerns | Major concerns | No concerns   | Major concerns | very low | serious imprecision and incoherence             |

|                                          |   |             |          |               |                |                |                |          |                                                 |
|------------------------------------------|---|-------------|----------|---------------|----------------|----------------|----------------|----------|-------------------------------------------------|
| <b>SBLACLACIDBBIFLRHAM:SLREUT</b>        | 0 | No concerns | Low risk | No concerns   | No concerns    | No concerns    | Major concerns | low      | serious incoherence                             |
| <b>SBLACLACIDBBIFLRHAM:SLREUTINCREM</b>  | 0 | No concerns | Low risk | No concerns   | No concerns    | Major concerns | Major concerns | very low | serious heterogeneity and incoherence           |
| <b>SBLACTDN:SBLACTIS</b>                 | 0 | No concerns | Low risk | No concerns   | Major concerns | No concerns    | Major concerns | very low | serious imprecision and incoherence             |
| <b>SBLACTDN:SLACIDLCASB BIFLRHAMLSAL</b> | 0 | No concerns | Low risk | No concerns   | No concerns    | Major concerns | Major concerns | very low | serious heterogeneity and incoherence           |
| <b>SBLACTDN:SLBREVISEPLANT</b>           | 0 | No concerns | Low risk | Some concerns | No concerns    | Major concerns | Major concerns | very low | serious heterogeneity and incoherence           |
| <b>SBLACTDN:SLREUTAA</b>                 | 0 | No concerns | Low risk | No concerns   | Some concerns  | Some concerns  | Major concerns | very low | imprecision, heterogeneity, serious incoherence |
| <b>SBLACTDN:SLREUTD</b>                  | 0 | No concerns | Low risk | No concerns   | Major concerns | No concerns    | Major concerns | very low | serious imprecision and incoherence             |
| <b>SBLACTDN:SLREUTDA</b>                 | 0 | No concerns | Low risk | No concerns   | Major concerns | No concerns    | Major concerns | very low | serious imprecision and incoherence             |
| <b>SBLACTDN:SLREUTSINGLE</b>             | 0 | No concerns | Low risk | No concerns   | Major concerns | No concerns    | Major concerns | very low | serious imprecision and incoherence             |
| <b>SBLACTDN:SLRHAM</b>                   | 0 | No concerns | Low risk | Some concerns | No concerns    | Major concerns | Major concerns | very low | serious heterogeneity and incoherence           |
| <b>SBLACTDN:SLSPPBSPP</b>                | 0 | No concerns | Low risk | No concerns   | No concerns    | Major concerns | Major concerns | very low | serious heterogeneity and incoherence           |
| <b>SBLACTDN:SRP</b>                      | 0 | No concerns | Low risk | No concerns   | No concerns    | No concerns    | Major concerns | low      | serious incoherence                             |
| <b>SBLACTDN:SSORALUBERAT</b>             | 0 | No concerns | Low risk | Some concerns | Major concerns | No concerns    | Major concerns | very low | serious imprecision and incoherence             |
| <b>SBLACTDN:SLREUT</b>                   | 0 | No concerns | Low risk | No concerns   | Major concerns | No concerns    | Major concerns | very low | serious imprecision and incoherence             |
| <b>SBLACTDN:SLREUTINCREM</b>             | 0 | No concerns | Low risk | No concerns   | Major concerns | No concerns    | Major concerns | very low | serious imprecision and incoherence             |
| <b>SBLACTIS:SLACIDLCASB BIFLRHAMLSAL</b> | 0 | No concerns | Low risk | No concerns   | Major concerns | No concerns    | Major concerns | very low | serious imprecision and incoherence             |



|                                               |   |               |          |               |                |                |                |          |                                       |
|-----------------------------------------------|---|---------------|----------|---------------|----------------|----------------|----------------|----------|---------------------------------------|
| <b>SBLACTIS:SLBREVISEPLANT</b>                | 0 | No concerns   | Low risk | Some concerns | Major concerns | No concerns    | Major concerns | very low | serious imprecision and incoherence   |
| <b>SBLACTIS:SLREUTAA</b>                      | 0 | No concerns   | Low risk | No concerns   | No concerns    | No concerns    | Major concerns | low      | serious incoherence                   |
| <b>SBLACTIS:SLREUTD</b>                       | 0 | No concerns   | Low risk | No concerns   | Major concerns | No concerns    | Major concerns | very low | serious imprecision and incoherence   |
| <b>SBLACTIS:SLREUTDA</b>                      | 0 | No concerns   | Low risk | No concerns   | Major concerns | No concerns    | Major concerns | very low | serious imprecision and incoherence   |
| <b>SBLACTIS:SLREUTSINGLE</b>                  | 0 | No concerns   | Low risk | No concerns   | No concerns    | Major concerns | Major concerns | very low | serious heterogeneity and incoherence |
| <b>SBLACTIS:SLRHAM</b>                        | 0 | No concerns   | Low risk | Some concerns | Major concerns | No concerns    | Major concerns | very low | serious imprecision and incoherence   |
| <b>SBLACTIS:SLSPPBSPP</b>                     | 0 | No concerns   | Low risk | No concerns   | Major concerns | No concerns    | Major concerns | very low | serious imprecision and incoherence   |
| <b>SBLACTIS:SRP</b>                           | 0 | No concerns   | Low risk | No concerns   | No concerns    | Major concerns | Major concerns | very low | serious heterogeneity and incoherence |
| <b>SBLACTIS:SSORALUBERRAT</b>                 | 0 | No concerns   | Low risk | Some concerns | Major concerns | No concerns    | Major concerns | very low | serious imprecision and incoherence   |
| <b>SBLACTIS:SLREUT</b>                        | 0 | No concerns   | Low risk | No concerns   | No concerns    | No concerns    | Major concerns | low      | serious incoherence                   |
| <b>SBLACTIS:SLREUTINCREM</b>                  | 0 | No concerns   | Low risk | No concerns   | No concerns    | Major concerns | Major concerns | very low | serious heterogeneity and incoherence |
| <b>SLACIDLCASBBIFLRHAMLSAL:SLBREVISEPLANT</b> | 0 | No concerns   | Low risk | Some concerns | Major concerns | No concerns    | Major concerns | very low | serious imprecision and incoherence   |
| <b>SLACIDLCASBBIFLRHAMLSAL:SLREUTAA</b>       | 0 | No concerns   | Low risk | No concerns   | No concerns    | No concerns    | Major concerns | low      | serious incoherence                   |
| <b>SLACIDLCASBBIFLRHAMLSAL:SLREUTD</b>        | 0 | Some concerns | Low risk | No concerns   | No concerns    | Major concerns | Major concerns | very low | serious heterogeneity and incoherence |
| <b>SLACIDLCASBBIFLRHAMLSAL:SLREUTDA</b>       | 0 | Some concerns | Low risk | Some concerns | No concerns    | Major concerns | Major concerns | very low | serious heterogeneity and incoherence |
| <b>SLACIDLCASBBIFLRHAMLSAL:SLREUTSINGLE</b>   | 0 | No concerns   | Low risk | No concerns   | No concerns    | No concerns    | Major concerns | low      | serious incoherence                   |

|                                                   |   |               |          |               |                |                |                |          |                                       |
|---------------------------------------------------|---|---------------|----------|---------------|----------------|----------------|----------------|----------|---------------------------------------|
| <b>SLACIDLCASBBIFLRHAM<br/>LSAL:SLRHAM</b>        | 0 | No concerns   | Low risk | Some concerns | Major concerns | No concerns    | Major concerns | very low | serious imprecision and incoherence   |
| <b>SLACIDLCASBBIFLRHAM<br/>LSAL:SLSPPBSPP</b>     | 0 | No concerns   | Low risk | No concerns   | Major concerns | No concerns    | Major concerns | very low | serious imprecision and incoherence   |
| <b>SLACIDLCASBBIFLRHAM<br/>LSAL:SSORALUBERRAT</b> | 0 | No concerns   | Low risk | Some concerns | Major concerns | No concerns    | Major concerns | very low | serious imprecision and incoherence   |
| <b>SLACIDLCASBBIFLRHAM<br/>LSAL:SLREUT</b>        | 0 | No concerns   | Low risk | No concerns   | No concerns    | No concerns    | Major concerns | low      | serious incoherence                   |
| <b>SLACIDLCASBBIFLRHAM<br/>LSAL:SLREUTINCREM</b>  | 0 | No concerns   | Low risk | No concerns   | No concerns    | No concerns    | Major concerns | low      | serious incoherence                   |
| <b>SLACIDLCASBBIFLRHAM<br/>LSAL:SPLAC</b>         | 0 | Some concerns | Low risk | No concerns   | Major concerns | No concerns    | Major concerns | very low | serious imprecision and incoherence   |
| <b>SLBREVISEPLANT:SLREU<br/>TAA</b>               | 0 | No concerns   | Low risk | Some concerns | No concerns    | No concerns    | Major concerns | very low | serious incoherence                   |
| <b>SLBREVISEPLANT:SLREU<br/>TD</b>                | 0 | No concerns   | Low risk | No concerns   | Major concerns | No concerns    | Major concerns | very low | serious imprecision and incoherence   |
| <b>SLBREVISEPLANT:SLREU<br/>TDA</b>               | 0 | No concerns   | Low risk | Some concerns | Major concerns | No concerns    | Major concerns | very low | serious imprecision and incoherence   |
| <b>SLBREVISEPLANT:SLREU<br/>TSINGLE</b>           | 0 | No concerns   | Low risk | No concerns   | No concerns    | Major concerns | Major concerns | very low | serious heterogeneity and incoherence |
| <b>SLBREVISEPLANT:SLRHA<br/>M</b>                 | 0 | No concerns   | Low risk | Some concerns | Major concerns | No concerns    | Major concerns | very low | serious imprecision and incoherence   |
| <b>SLBREVISEPLANT:SLSP<br/>BSPP</b>               | 0 | No concerns   | Low risk | Some concerns | Major concerns | No concerns    | Major concerns | very low | serious imprecision and incoherence   |
| <b>SLBREVISEPLANT:SRP</b>                         | 0 | No concerns   | Low risk | No concerns   | Major concerns | No concerns    | Major concerns | very low | serious imprecision and incoherence   |
| <b>SLBREVISEPLANT:SSORA<br/>LUBERRAT</b>          | 0 | No concerns   | Low risk | Some concerns | Major concerns | No concerns    | Major concerns | very low | serious imprecision and incoherence   |
| <b>SLBREVISEPLANT:SLREU<br/>T</b>                 | 0 | No concerns   | Low risk | Some concerns | No concerns    | No concerns    | Major concerns | very low | serious incoherence                   |
| <b>SLBREVISEPLANT:SLREU<br/>TINCREM</b>           | 0 | No concerns   | Low risk | No concerns   | No concerns    | No concerns    | Major concerns | low      | serious incoherence                   |

|                               |   |               |          |               |                |                |                |          |                                       |
|-------------------------------|---|---------------|----------|---------------|----------------|----------------|----------------|----------|---------------------------------------|
| <b>SLREUTAA:SLREUTD</b>       | 0 | No concerns   | Low risk | No concerns   | No concerns    | No concerns    | Major concerns | low      | serious incoherence                   |
| <b>SLREUTAA:SLREUTDA</b>      | 0 | No concerns   | Low risk | No concerns   | No concerns    | No concerns    | Major concerns | low      | serious incoherence                   |
| <b>SLREUTAA:SLREUTSINGLE</b>  | 0 | No concerns   | Low risk | No concerns   | Major concerns | No concerns    | Major concerns | very low | serious imprecision and incoherence   |
| <b>SLREUTAA:SLRHAM</b>        | 0 | No concerns   | Low risk | Some concerns | No concerns    | No concerns    | Major concerns | very low | serious incoherence                   |
| <b>SLREUTAA:SLSPPBSPP</b>     | 0 | No concerns   | Low risk | No concerns   | No concerns    | No concerns    | Major concerns | low      | serious incoherence                   |
| <b>SLREUTAA:SRP</b>           | 0 | No concerns   | Low risk | No concerns   | No concerns    | No concerns    | Major concerns | low      | serious incoherence                   |
| <b>SLREUTAA:SSORALUBERRAT</b> | 0 | No concerns   | Low risk | Some concerns | No concerns    | No concerns    | Major concerns | very low | serious incoherence                   |
| <b>SLREUT:SLREUTAA</b>        | 0 | No concerns   | Low risk | No concerns   | Major concerns | No concerns    | Major concerns | very low | serious imprecision and incoherence   |
| <b>SLREUTAA:SLREUTINCREM</b>  | 0 | No concerns   | Low risk | No concerns   | Major concerns | No concerns    | Major concerns | very low | serious imprecision and incoherence   |
| <b>SLREUTD:SLREUTDA</b>       | 0 | Some concerns | Low risk | No concerns   | Major concerns | No concerns    | Major concerns | very low | serious imprecision and incoherence   |
| <b>SLREUTD:SLREUTSINGLE</b>   | 0 | No concerns   | Low risk | No concerns   | Major concerns | No concerns    | Major concerns | very low | serious imprecision and incoherence   |
| <b>SLREUTD:SLRHAM</b>         | 0 | No concerns   | Low risk | No concerns   | Major concerns | No concerns    | Major concerns | very low | serious imprecision and incoherence   |
| <b>SLREUTD:SLSPPBSPP</b>      | 0 | No concerns   | Low risk | No concerns   | Major concerns | No concerns    | Major concerns | very low | serious imprecision and incoherence   |
| <b>SLREUTD:SSORALUBERRAT</b>  | 0 | No concerns   | Low risk | No concerns   | Major concerns | No concerns    | Major concerns | very low | serious imprecision and incoherence   |
| <b>SLREUT:SLREUTD</b>         | 0 | No concerns   | Low risk | No concerns   | No concerns    | No concerns    | Major concerns | low      | serious incoherence                   |
| <b>SLREUTD:SLREUTINCREM</b>   | 0 | No concerns   | Low risk | No concerns   | No concerns    | Major concerns | Major concerns | very low | serious heterogeneity and incoherence |

|                                   |   |             |          |               |                |                |                |          |                                       |
|-----------------------------------|---|-------------|----------|---------------|----------------|----------------|----------------|----------|---------------------------------------|
| <b>SLREUTDA:SLREUTSINGLE</b>      | 0 | No concerns | Low risk | No concerns   | Major concerns | No concerns    | Major concerns | very low | serious imprecision and incoherence   |
| <b>SLREUTDA:SLRHAM</b>            | 0 | No concerns | Low risk | Some concerns | No concerns    | Major concerns | Major concerns | very low | serious heterogeneity and incoherence |
| <b>SLREUTDA:SLSPPBSPP</b>         | 0 | No concerns | Low risk | No concerns   | Major concerns | No concerns    | Major concerns | very low | serious imprecision and incoherence   |
| <b>SLREUTDA:SSORALUBERRAT</b>     | 0 | No concerns | Low risk | Some concerns | Major concerns | No concerns    | Major concerns | very low | serious imprecision and incoherence   |
| <b>SLREUT:SLREUTDA</b>            | 0 | No concerns | Low risk | No concerns   | No concerns    | No concerns    | Major concerns | low      | serious incoherence                   |
| <b>SLREUTDA:SLREUTINCREM</b>      | 0 | No concerns | Low risk | No concerns   | No concerns    | Major concerns | Major concerns | very low | serious heterogeneity and incoherence |
| <b>SLREUTSINGLE:SLRHAM</b>        | 0 | No concerns | Low risk | No concerns   | No concerns    | Some concerns  | Major concerns | very low | heterogeneity and serious incoherence |
| <b>SLREUTSINGLE:SLSPPBSPP</b>     | 0 | No concerns | Low risk | No concerns   | No concerns    | Major concerns | Major concerns | very low | serious heterogeneity and incoherence |
| <b>SLREUTSINGLE:SRP</b>           | 0 | No concerns | Low risk | No concerns   | No concerns    | No concerns    | Major concerns | low      | serious incoherence                   |
| <b>SLREUTSINGLE:SSORALUBERRAT</b> | 0 | No concerns | Low risk | No concerns   | Major concerns | No concerns    | Major concerns | very low | serious imprecision and incoherence   |
| <b>SLREUT:SLREUTSINGLE</b>        | 0 | No concerns | Low risk | No concerns   | Major concerns | No concerns    | Major concerns | very low | serious imprecision and incoherence   |
| <b>SLRHAM:SLSPPBSPP</b>           | 0 | No concerns | Low risk | Some concerns | Major concerns | No concerns    | Major concerns | very low | serious imprecision and incoherence   |
| <b>SLRHAM:SRP</b>                 | 0 | No concerns | Low risk | Some concerns | Major concerns | No concerns    | Major concerns | very low | serious imprecision and incoherence   |
| <b>SLRHAM:SSORALUBERRAT</b>       | 0 | No concerns | Low risk | Some concerns | Major concerns | No concerns    | Major concerns | very low | serious imprecision and incoherence   |
| <b>SLREUT:SLRHAM</b>              | 0 | No concerns | Low risk | Some concerns | No concerns    | No concerns    | Major concerns | very low | serious incoherence                   |
| <b>SLREUTINCREM:SLRHAM</b>        | 0 | No concerns | Low risk | No concerns   | No concerns    | No concerns    | Major concerns | low      | serious incoherence                   |

|                                   |   |             |          |               |                |                |                |          |                                       |
|-----------------------------------|---|-------------|----------|---------------|----------------|----------------|----------------|----------|---------------------------------------|
| <b>SLSPPBSPP:SRP</b>              | 0 | No concerns | Low risk | No concerns   | Major concerns | No concerns    | Major concerns | very low | serious imprecision and incoherence   |
| <b>SLSPPBSPP:SSORALUBERRAT</b>    | 0 | No concerns | Low risk | Some concerns | Major concerns | No concerns    | Major concerns | very low | serious imprecision and incoherence   |
| <b>SLREUT:SLSPPBSPP</b>           | 0 | No concerns | Low risk | No concerns   | No concerns    | No concerns    | Major concerns | low      | serious incoherence                   |
| <b>SLREUTINCREM:SLSPPBSPP</b>     | 0 | No concerns | Low risk | No concerns   | No concerns    | No concerns    | Major concerns | low      | serious incoherence                   |
| <b>SRP:SSORALUBERRAT</b>          | 0 | No concerns | Low risk | No concerns   | Some concerns  | Some concerns  | Major concerns | very low | imprecision, serious incoherence      |
| <b>SLREUT:SRP</b>                 | 0 | No concerns | Low risk | No concerns   | No concerns    | No concerns    | Major concerns | low      | serious incoherence                   |
| <b>SLREUTINCREM:SRP</b>           | 0 | No concerns | Low risk | No concerns   | No concerns    | No concerns    | Major concerns | low      | serious incoherence                   |
| <b>SPLAC:SRP</b>                  | 0 | No concerns | Low risk | No concerns   | No concerns    | Major concerns | Major concerns | very low | serious heterogeneity and incoherence |
| <b>SLREUT:SSORALUBERRAT</b>       | 0 | No concerns | Low risk | Some concerns | No concerns    | No concerns    | Major concerns | very low | serious incoherence                   |
| <b>SLREUTINCREM:SSORALUBERRAT</b> | 0 | No concerns | Low risk | No concerns   | No concerns    | Major concerns | Major concerns | very low | serious heterogeneity and incoherence |
| <b>SLREUT:SLREUTINCREM</b>        | 0 | No concerns | Low risk | No concerns   | Major concerns | No concerns    | Major concerns | very low | serious imprecision and incoherence   |

Only for confidence rating ranging from 'very low' to 'moderate' the reasons for the downgrade were presented, since there were constraints in at least one of the six domains assessed by CINeMA.

## Appendix 7: Flow Diagram summarizing the search strategy and study selection

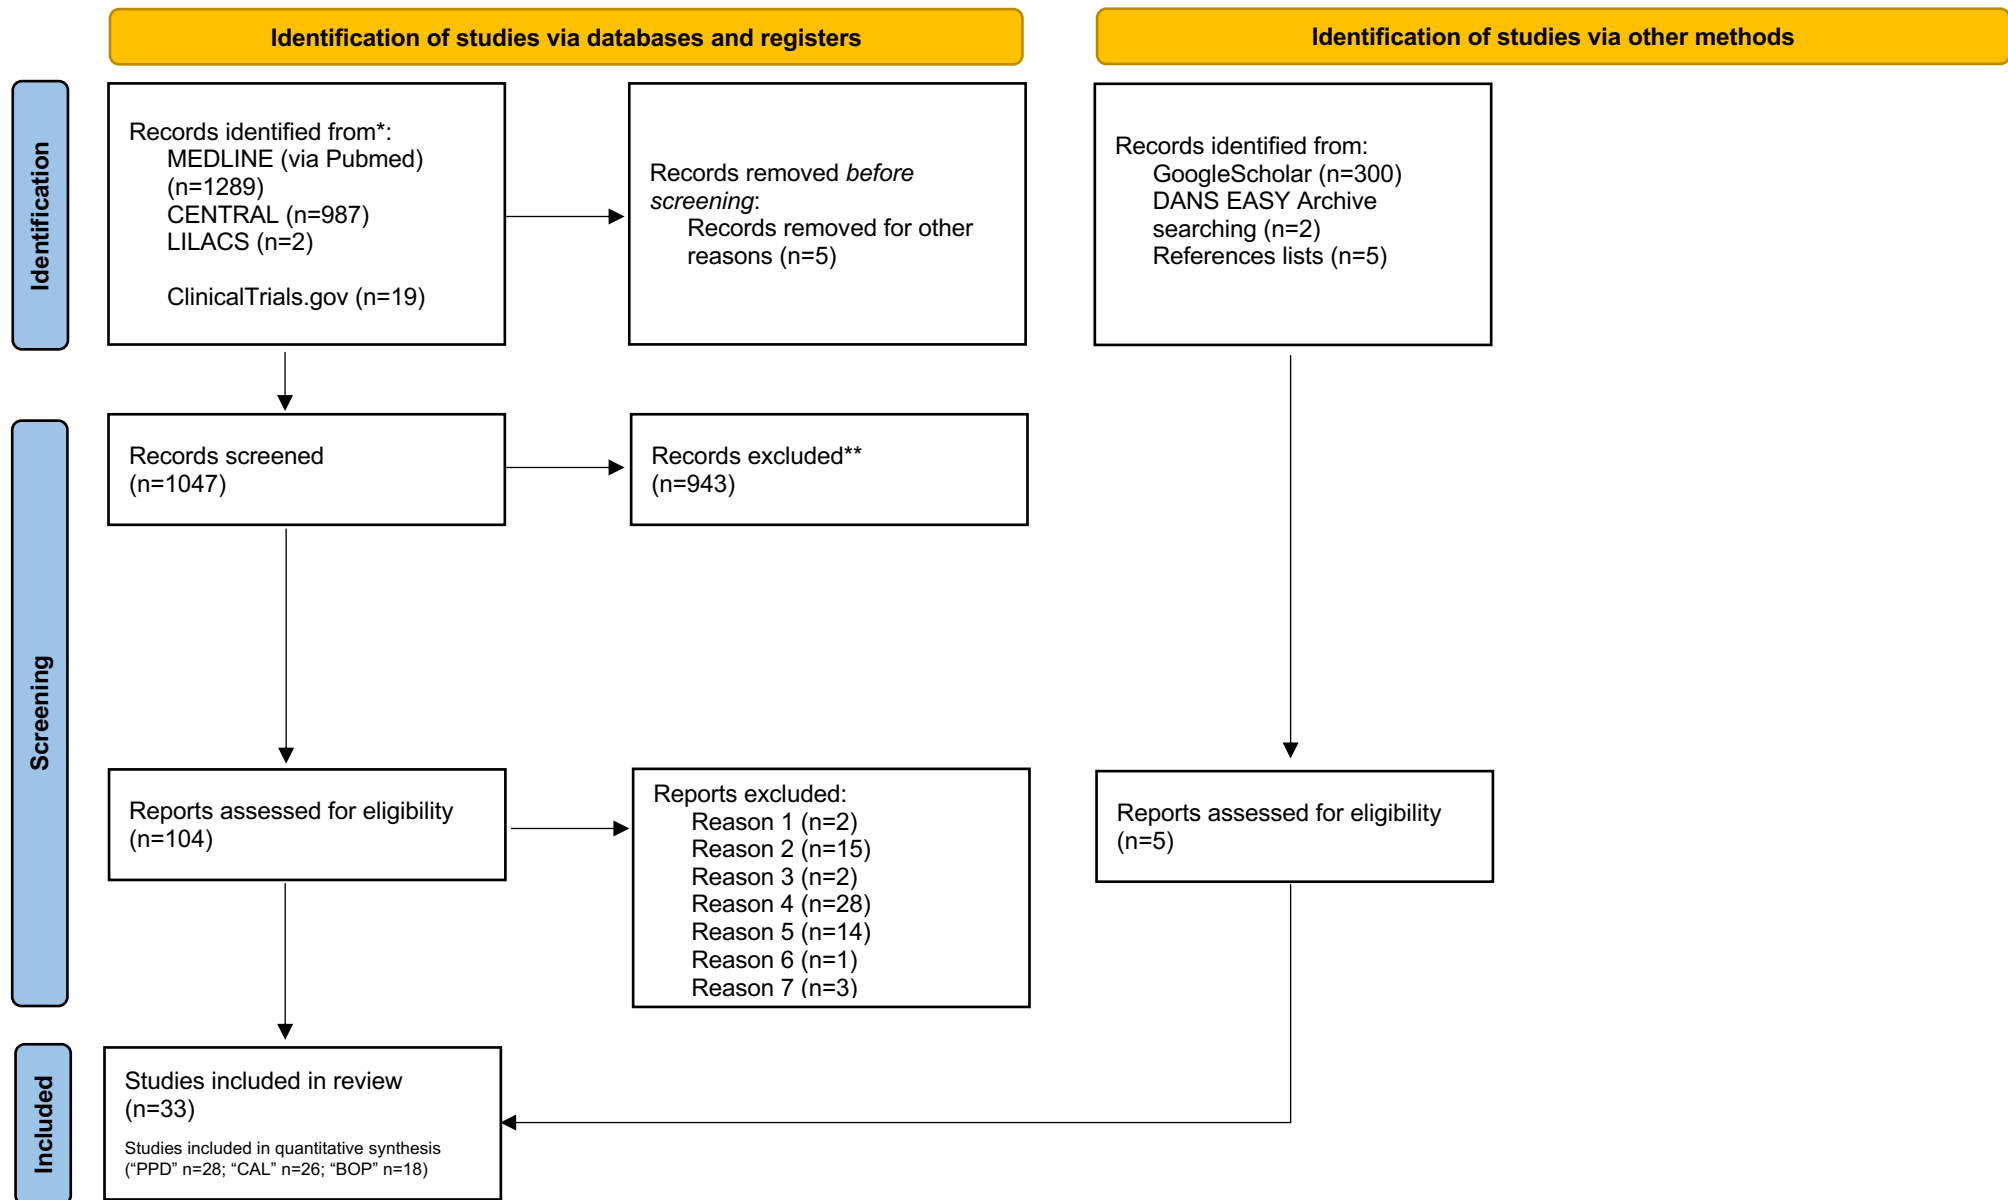

\*Consider, if feasible to do so, reporting the number of records identified from each database or register searched (rather than the total number across all databases/registers).

\*\*If automation tools were used, indicate how many records were excluded by a human and how many were excluded by automation tools.

Source: Page MJ, et al. BMJ 2021;372:n71. doi: 10.1136/bmj.n71.

This work is licensed under CC BY 4.0. To view a copy of this license, visit <https://creativecommons.org/licenses/by/4.0/>





## Appendix 8: Summary of the included RCTs

Table 13 - Main characteristics and results of the included RCTs

| studlab                                | sample size                         | age $\pm$ SD | gender (M/F)         | intervention             | probiotic strain and concentration                                                                                                                          | comparison                                     | CAL (mm)                                                                                                                                                                         | PPD (mm)                                                                                                                                                                         | PI (%)                                                                                                                                                                                  | BOP (%)                                                                                                   | CFU                                                                                                                                                                                                                                                                                                                                                                                                                                                                                                                                                                                                | adverse effects | smoking habits  | follow-up period |
|----------------------------------------|-------------------------------------|--------------|----------------------|--------------------------|-------------------------------------------------------------------------------------------------------------------------------------------------------------|------------------------------------------------|----------------------------------------------------------------------------------------------------------------------------------------------------------------------------------|----------------------------------------------------------------------------------------------------------------------------------------------------------------------------------|-----------------------------------------------------------------------------------------------------------------------------------------------------------------------------------------|-----------------------------------------------------------------------------------------------------------|----------------------------------------------------------------------------------------------------------------------------------------------------------------------------------------------------------------------------------------------------------------------------------------------------------------------------------------------------------------------------------------------------------------------------------------------------------------------------------------------------------------------------------------------------------------------------------------------------|-----------------|-----------------|------------------|
| Abuazab2021 (Abuazab et al., 2021)     | 30 (SRP:10; SRP+CHX:10 SRP+Prob:10) | 30-50        | 12 males; 18 females | Group I: SRP + probiotic | Bifidobacterium bifidum, EMCC #: 1334, Designation: DSM 20082, E 319f, JCM 12, isolated from intestine of adults and supplied as actively growing cultures. | Group II: SRP + CHX gel<br>Group III: SRP only | (SRP) Day 0: 2.78 $\pm$ 0.31;<br>6w: 2.25 $\pm$ 0.35;<br>(SRP+CHX) Day 0: 2.57 $\pm$ 0.34;<br>6w: 1.96 $\pm$ 0.41;<br>(SRP+prob) Day 0: 2.79 $\pm$ 0.34;<br>6w: 1.87 $\pm$ 0.41. | (SRP) Day 0: 3.28 $\pm$ 0.39;<br>6w: 1.92 $\pm$ 0.23;<br>(SRP+CHX) Day 0: 3.06 $\pm$ 0.45;<br>6w: 1.97 $\pm$ 0.32;<br>(SRP+prob) Day 0: 3.29 $\pm$ 0.39;<br>6w: 2.02 $\pm$ 0.42. | (SRP) Day 0: 2.33 $\pm$ 0.21;<br>6w: 0.826 $\pm$ 0.109;<br>(SRP+CHX) Day 0: 2.49 $\pm$ 0.245;<br>6w: 0.889 $\pm$ 0.138;<br>(SRP+prob) Day 0: 2.34 $\pm$ 0.24;<br>6w: 0.766 $\pm$ 0.096. | NR                                                                                                        | (Pg)<br>(SRP) Day 0: 29.0 $\pm$ 10.15;<br>6w: 17.0 $\pm$ 1.9;<br>(SRP+CHX) Day 0: 28.0 $\pm$ 17.52;<br>6w: 9.0 $\pm$ 2.0;<br>(SRP+prob) Day 0: 30.0 $\pm$ 14.43;<br>6w: 7.0 $\pm$ 1.4;<br>(Pi)<br>(SRP) Day 0: 32.0 $\pm$ 8.93;<br>6w: 19.0 $\pm$ 3.1;<br>(SRP+CHX) Day 0: 33.0 $\pm$ 18.7;<br>6w: 12.0 $\pm$ 1.5;<br>(SRP+prob) Day 0: 35.0 $\pm$ 11.28;<br>6w: 11.0 $\pm$ 2.5;<br>(Total load) (SRP) Day 0: 965.0 $\pm$ 166.02;<br>6w: 612.0 $\pm$ 146.35;<br>(SRP+CHX) Day 0: 884.0 $\pm$ 187.39;<br>6w: 581.0 $\pm$ 177.60;<br>(SRP+prob) Day 0: 928.50 $\pm$ 183.88;<br>6w: 505 $\pm$ 174.42. | None            | All non-smokers | 6 weeks          |
| Alshareef2020 (Alshareef et al., 2020) | 25 (SRP: 10; SRP+prob: 15)          | 29 $\pm$ 96  | NR                   | SRP + probiotic          | Each probiotic lozenge contains five bifid bacteria including Lactobacillus acidophilus,                                                                    | SRP alone                                      | (SRP) Day 0: 3.4930 $\pm$ 0.66101;<br>30d: 3.1490 $\pm$ 0.65514; .<br>(SRP+prob) Day 0: 3.5740 $\pm$ 0.58024;                                                                    | (SRP) Day 0: 2.6130 $\pm$ 0.41508;<br>30d: 2.3380 $\pm$ 0.43235; .<br>(SRP+prob) Day 0: 2.5533 $\pm$ 0.23654;                                                                    | (SRP) Day 0: 47.3250 $\pm$ 15.38717;<br>30d: 37.3160 $\pm$ 12.29990; .<br>(SRP+prob) Day 0: 44.0127 $\pm$                                                                               | (SRP) Day 0: 49.7550 $\pm$ 13.93193;<br>30d: 40.8200 $\pm$ 13.21242; .<br>(SRP+prob) Day 0: 40.7533 $\pm$ | NR                                                                                                                                                                                                                                                                                                                                                                                                                                                                                                                                                                                                 | NR              | NR              | 30 days          |

|                                         |                                                                     |                                                               |                                                                      |                                                                   |                                                                                                                                 |                               |                                                                                                                                                                      |                                                                                                                                                                      |                                                                                                                                                                                  |                                                                                                                                                                                  |                                                                                                                                                                                                                                                                                                                                                                                                                                                                                                                                                                                                                  |    |    |          |
|-----------------------------------------|---------------------------------------------------------------------|---------------------------------------------------------------|----------------------------------------------------------------------|-------------------------------------------------------------------|---------------------------------------------------------------------------------------------------------------------------------|-------------------------------|----------------------------------------------------------------------------------------------------------------------------------------------------------------------|----------------------------------------------------------------------------------------------------------------------------------------------------------------------|----------------------------------------------------------------------------------------------------------------------------------------------------------------------------------|----------------------------------------------------------------------------------------------------------------------------------------------------------------------------------|------------------------------------------------------------------------------------------------------------------------------------------------------------------------------------------------------------------------------------------------------------------------------------------------------------------------------------------------------------------------------------------------------------------------------------------------------------------------------------------------------------------------------------------------------------------------------------------------------------------|----|----|----------|
|                                         |                                                                     |                                                               |                                                                      |                                                                   | Lactobacillus casei, Bifidobacterium bifidum, Lactobacillus rhamnosus, and Lactobacillus salivarius.                            |                               | 30d: 3.1487 ± 0.59010.                                                                                                                                               | 30d: 2.1973 ± 0.27830.                                                                                                                                               | 10.06966; 30d: 35.7433 ± 15.18255.                                                                                                                                               | 9.58256; 30d: 32.1533 ± 8.50200.                                                                                                                                                 |                                                                                                                                                                                                                                                                                                                                                                                                                                                                                                                                                                                                                  |    |    |          |
| <b>Butera2020( Butera et al., 2020)</b> | 60 (SRP+CHX: 20; SRP+probToothpaste:20; SRP+probToothpaste&gum: 20) | SRP+CHX: 55 SRP+probToothpaste: 49 SRP+probToothpaste&gum: 55 | SRP+CHX: 9/11 SRP+probToothpaste: 13/7 SRP+probToothpaste&gum: 10/10 | SRP + Probiotic toothpaste SRP + Probiotic toothpaste+chewing gum | Toothpaste: Bifidobacterium*, Lactobacillus*<br>Chewing gum: L. reuteri (SGL 01), L. salivarius (SGL 03), L. plantarum (SGL 07) | SRP + Curasept CHX toothpaste | (CHXtoothpaste) Day 0: 5.83 ± 1.87; 6m: 5.57 ± 1.72; (ProbToothpaste) Day 0: 5.64 ± 2.27; 6m: 4.44 ± 2.14; (ProbToothpaste+gum) Day 0: 5.36 ± 1.46; 6m: 3.46 ± 0.94. | (CHXtoothpaste) Day 0: 5.88 ± 1.26; 6m: 5.80 ± 1.08; (ProbToothpaste) Day 0: 5.67 ± 0.74; 6m: 4.46 ± 0.84; (ProbToothpaste+gum) Day 0: 5.57 ± 0.85; 6m: 3.52 ± 0.53. | (CHXtoothpaste) Day 0: 70.00 ± 26.56; 6m: 67.00 ± 22.33; (ProbToothpaste) Day 0: 68.50 ± 22.48; 6m: 34.15 ± 14.08; (ProbToothpaste+gum) Day 0: 70.50 ± 20.38; 6m: 28.50 ± 17.85. | (CHXtoothpaste) Day 0: 66.25 ± 17.23; 6m: 64.00 ± 14.01; (ProbToothpaste) Day 0: 67.00 ± 24.94; 6m: 33.00 ± 20.39; (ProbToothpaste+gum) Day 0: 66.15 ± 34.89; 6m: 21.50 ± 17.55. | (Aa) (CHXtoothpaste) Day 0: 1247.48 ± 1238.52; 6m: 1030.08 ± 1202.40; (ProbToothpaste) Day 0: 528 ± 1121.42; 6m: 734.5 ± 2076.09; (ProbToothpaste+gum) Day 0: 650.25 ± 1114.43; 6m: 406.2 ± 919.53; (Pg) (CHXtoothpaste) Day 0: 10530.55 ± 18424.41; 6m: 8479 ± 3974.44; (ProbToothpaste) Day 0: 9107.65 ± 21882.53; 6m: 7625.75 ± 22714.00; (ProbToothpaste+gum) Day 0: 11644.1 ± 23306.05; 6m: 7553.641 ± 15781.77; (Tf) (CHXtoothpaste) Day 0: 34012.51 ± 54134.03; 6m: 40990 ± 19938.19; (ProbToothpaste) Day 0: 57690.4 ± 90873.28; 6m: 25656.4 ± 48302.74; (ProbToothpaste+gum) Day 0: 35091.9 ± 40463.06; | NR | NR | 6 months |

|  |  |  |  |  |  |  |  |  |  |  |                                                                                                                                                                                                                                                                                                                                                                                                                                                                                                                                                                                                                                                                                                                                                                                                                                                                                                                                                                                                                   |  |  |  |
|--|--|--|--|--|--|--|--|--|--|--|-------------------------------------------------------------------------------------------------------------------------------------------------------------------------------------------------------------------------------------------------------------------------------------------------------------------------------------------------------------------------------------------------------------------------------------------------------------------------------------------------------------------------------------------------------------------------------------------------------------------------------------------------------------------------------------------------------------------------------------------------------------------------------------------------------------------------------------------------------------------------------------------------------------------------------------------------------------------------------------------------------------------|--|--|--|
|  |  |  |  |  |  |  |  |  |  |  | <p>6m: 3929080<br/>± 66828.91;<br/><i>(Td)</i><br/>(CHXtoothpa<br/>ste) Day 0:<br/>7339.82 ±<br/>19922.95;<br/>6m: 4651 ±<br/>2158.87;<br/>(ProbToothpa<br/>ste) Day 0:<br/>5318 ±<br/>10086.63;<br/>6m: 10244.63<br/>± 15860.15;<br/>(ProbToothpa<br/>ste+gum) Day<br/>0: 5521.75 ±<br/>18720.46;<br/>6m: 6065.13<br/>± 19738.92;<br/><i>(Pi)</i><br/>(CHXtoothpa<br/>ste) Day 0:<br/>11018 ±<br/>10208.32;<br/>6m: 8830 ±<br/>5617.44;<br/>(ProbToothpa<br/>ste) Day 0:<br/>9720.1 ±<br/>2405.66;<br/>6m: 3536 ±<br/>5931.72;<br/>(ProbToothpa<br/>ste+gum) Day<br/>0: 7476.55 ±<br/>4787.82;<br/>6m: 2520.5 ±<br/>2435.87;<br/><i>(Fn)</i><br/>(CHXtoothpa<br/>ste) Day 0:<br/>17607.3 ±<br/>25342.18;<br/>6m: 16298.82<br/>± 17212.96;<br/>(ProbToothpa<br/>ste) Day 0:<br/>19381.2 ±<br/>10360.37;<br/>6m: 7843.6 ±<br/>5509.43;<br/>(ProbToothpa<br/>ste+gum) Day<br/>0: 18053 ±<br/>10931.75;<br/>6m: 7211.78<br/>± 5971.25;<br/><i>(Total<br/>Bacteria<br/>Count)</i><br/>(CHXtoothpa<br/>ste) Day 0:</p> |  |  |  |
|--|--|--|--|--|--|--|--|--|--|--|-------------------------------------------------------------------------------------------------------------------------------------------------------------------------------------------------------------------------------------------------------------------------------------------------------------------------------------------------------------------------------------------------------------------------------------------------------------------------------------------------------------------------------------------------------------------------------------------------------------------------------------------------------------------------------------------------------------------------------------------------------------------------------------------------------------------------------------------------------------------------------------------------------------------------------------------------------------------------------------------------------------------|--|--|--|

|                                                |                                  |                                         |                                             |                 |                                                                                                                                                                                                                                                                                                                                                                                                                                                                                                      |           |                                                                                                     |                                                                                                     |                                                                                                     |                                                                     |                                                                                                                                                                                                               |    |                 |          |
|------------------------------------------------|----------------------------------|-----------------------------------------|---------------------------------------------|-----------------|------------------------------------------------------------------------------------------------------------------------------------------------------------------------------------------------------------------------------------------------------------------------------------------------------------------------------------------------------------------------------------------------------------------------------------------------------------------------------------------------------|-----------|-----------------------------------------------------------------------------------------------------|-----------------------------------------------------------------------------------------------------|-----------------------------------------------------------------------------------------------------|---------------------------------------------------------------------|---------------------------------------------------------------------------------------------------------------------------------------------------------------------------------------------------------------|----|-----------------|----------|
|                                                |                                  |                                         |                                             |                 |                                                                                                                                                                                                                                                                                                                                                                                                                                                                                                      |           |                                                                                                     |                                                                                                     |                                                                                                     |                                                                     | 1648650 ± 2571189.00;<br>6m: 561150 ± 349477.80;<br>(ProbToothpaste) Day 0: 1150665 ± 2270115.00;<br>6m: 535470 ± 306466.90;<br>(ProbToothpaste+gum) Day 0: 808115 ± 1619913.00;<br>6m: 2097731 ± 5655579.00; |    |                 |          |
| <b>Chandra2016(Chandra et al., 2016)</b>       | 30<br>(SRP: 27;<br>SRP+prob:30)  | 25-50                                   | NR                                          | SRP + probiotic | (250 mg; Florafī x®, Unique Biotech, Hyderabad, India) + The probiotic was mixed with a prebiotic (fructooligosaccharide, FOS; Mitushi Pharma, Ahmedabad, India), in the ratio of 4:1 to induce growth and activity in <i>S. boulardii</i> . Briefly, 30 preparations of 1 g <i>S. boulardii</i> -FOS mixture were made by stirring 200 mg of FOS and 800 mg of probiotic with a spatula containing approximately 5 billion colony forming units (CFU) of the yeast <i>Saccharomyces boulardii</i> . | SRP       | (SRP) Day 0: 3.52 ± 0.74;<br>6m: 1.80 ± 0.92;<br>(SRP+prob) Day 0: 3.57 ± 0.74;<br>6m: 0.61 ± 0.58. | (SRP) Day 0: 5.52 ± 0.74;<br>6m: 3.61 ± 0.97;<br>(SRP+prob) Day 0: 5.66 ± 0.73;<br>6m: 2.19 ± 0.51. | (SRP) Day 0: 1.79 ± 0.36;<br>6m: 0.92 ± 0.27;<br>(SRP+prob) Day 0: 1.58 ± 0.34;<br>6m: 0.64 ± 0.28. | NR                                                                  | NR                                                                                                                                                                                                            | NR | All non-smokers | 6 months |
| <b>Costacurta2018(Costacurta et al., 2018)</b> | 40<br>(SRP: 20;<br>SRP+prob: 20) | SRP: 51.8±14.94<br>SRP+prob: 41.3±11.85 | SRP: F:60%, M:40%<br>SRP+prob: F:40%, M:60% | SRP + probiotic | probiotic containing 10 <sup>8</sup> CFU of <i>Lactobacillus reuteri</i> DSM 17938 and 10                                                                                                                                                                                                                                                                                                                                                                                                            | SRP alone | (SRP) Day 0: 4.95 ± 0.56;<br>4w: 4.3 ± 0.52;<br>(SRP+prob) Day 0: 4.56 ±                            | (SRP) Day 0: 4.51 ± 0.54;<br>4w: 3.91 ± 0.50;<br>(SRP+prob) Day 0: 4.12 ±                           | NR                                                                                                  | (SRP) Day 0: 88.45 ± 9.63;<br>4w: 58.15±10.38;<br>(SRP+prob) Day 0: | NR                                                                                                                                                                                                            | NR | NR              | 4 weeks  |

|                                                 |                                 |                                             |                                          |                 |                                                                                                                                                                                                                                                                                                                                                                                    |               |                                                                                                     |                                                                                                     |                                                                                            |                                                                                                                 |                                                                                                                                                                                                                                                                                                             |                                                                                                                                                                                                          |                 |          |
|-------------------------------------------------|---------------------------------|---------------------------------------------|------------------------------------------|-----------------|------------------------------------------------------------------------------------------------------------------------------------------------------------------------------------------------------------------------------------------------------------------------------------------------------------------------------------------------------------------------------------|---------------|-----------------------------------------------------------------------------------------------------|-----------------------------------------------------------------------------------------------------|--------------------------------------------------------------------------------------------|-----------------------------------------------------------------------------------------------------------------|-------------------------------------------------------------------------------------------------------------------------------------------------------------------------------------------------------------------------------------------------------------------------------------------------------------|----------------------------------------------------------------------------------------------------------------------------------------------------------------------------------------------------------|-----------------|----------|
|                                                 |                                 |                                             |                                          |                 | 8 CFU of Lactobacillus reuteri ATCC PTA 5289                                                                                                                                                                                                                                                                                                                                       |               | 0.94; 4w: 3.94 ± 0.85.                                                                              | 0.89; 4w: 3.47 ± 0.65.                                                                              |                                                                                            | 87.5±14.75; 4w: 31.45±15.97.                                                                                    |                                                                                                                                                                                                                                                                                                             |                                                                                                                                                                                                          |                 |          |
| <b>deOliveira2022(de Oliveira et al., 2022)</b> | 48 (SRP+plac: 23; SRP+prob: 19) | NR                                          | NR                                       | SRP + probiotic | Dive strains of Lactobacillus spp. and three of Bifidobacterium spp.                                                                                                                                                                                                                                                                                                               | SRP + placebo | (SRP+plac) Day 0: 3.18 ± 0.785; 2m: 2.89 ± 0.711; (SRP+prob) Day 0: 3.31 ± 0.830; 2m: 2.74 ± 0.844. | (SRP+plac) Day 0: 2.82 ± 0.460; 2m: 2.24 ± 0.207; (SRP+prob) Day 0: 3.00 ± 0.363; 2m: 2.36 ± 0.319. | NR                                                                                         | (SRP+plac) Day 0: 45.10 ± 16.333; 2m: 24.70 ± 14.740; (SRP+prob) Day 0: 53.30 ± 24.148; 2m: 32.20 ± 17.111. (%) | NR                                                                                                                                                                                                                                                                                                          | Most patients reported feeling well during treatments; however, gastrointestinal symptoms were more frequently reported in the probiotic than placebo group, in particular the occurrence of soft stools | All non-smokers | 2 months |
| <b>Dhaliwal2017(Dhaliwal et al., 2017)</b>      | 27 (SRP: 13; SRP+prob: 14)      | SRP: 31 ± 8.07<br>SRP+prob: 33.46 ± 6.63    | 20 males (74.07%) and 7 females (25.93%) | SRP + probiotic | Bifilac lozenges (Tablets India Private Limited, Chennai). It is a commercially available probiotic preparation combined with prebiotics to enhance its action. Each tablet contains Streptococcus faecalis T-110 JPC -30 million CFU, Clostridium butyricum TO-A IHS-2 million CFU, Bacillus mesentericus TO-A JPC-1 million CFU and Lactobacillus sporogenes IHS-50 million CFU. | SRP alone     | (SRP) Day 0: 9.17 ± 0.75; 3m: 8.21 ± 1.08; (SRP+prob) Day 0: 9.45 ± 1.14; 3m: 8.16 ± 1.55.          | (SRP) Day 0: 4.97 ± 0.61; 3m: 4.15 ± 0.73; (SRP+prob) Day 0: 5.54 ± 1.08; 3m: 4.62 ± 1.32.          | (SRP) Day 0: 1.51 ± 0.40; 3m: 1.11 ± 0.15; (SRP+prob) Day 0: 1.59 ± 0.34; 3m: 1.20 ± 0.20. | NR                                                                                                              | (Aa) (SRP) Day 0: 10.57 ± 16.15; 3m: 11.07 ± 24.03; (SRP+prob) Day 0: 5.82 ± 10.60; 3m: 0.00 ± 0.00; (Pg) (SRP) Day 0: 28.29 ± 30.68; 3m: 14.36 ± 21.68; (SRP+prob) Day 0: 21.38 ± 22.51; 3m: 0.00 ± 0.00; (Pi) (SRP) Day 0: 0.71 ± 1.86; 3m: 2.57 ± 8.05; (SRP+prob) Day 0: 2.00 ± 5.54; 3m: 7.69 ± 27.74; | None                                                                                                                                                                                                     | NR              | 3 months |
| <b>El-Bagoory2021 (El-Bagoory et al., 2021)</b> | 12 (SRP: 6; SRP+prob: 6)        | SRP: 39.33 ± 3.20<br>SRP+prob: 39.33 ± 3.20 | SRP: 1/5<br>SRP+prob: 2/4                | SRP + probiotic | L. reuteri DSM 17938 [1 × 10 <sup>8</sup> CFU]                                                                                                                                                                                                                                                                                                                                     | SRP alone     | (SRP) Day 0: 3.30 ± 0.48; 6m: 2.30 ± 0.67; (SRP+prob) Day 0: 3.10 ± 0.32;                           | (SRP) Day 0: 5.30 ± 0.48; 6m: 4.30 ± 0.67; (SRP+prob) Day 0: 5.10 ± 0.32;                           | NR                                                                                         | NR                                                                                                              | (Pg) (SRP) Day 0: 31.01 ± 5.43; 6m: 36.10 ± 2.81; (SRP+prob) Day 0: 34.41 ± 1.13;                                                                                                                                                                                                                           | None                                                                                                                                                                                                     | All non-smokers | 6 months |

|                                          |                                 |                                                    |                                         |                 |                                                                                                                                                                                                                                                                                      |               |                                                                                                        |                                                                                                        |                                                                                                             |                                                                                                             |                                                                                                                                                                                                                                                                                                                                                   |      |                 |          |
|------------------------------------------|---------------------------------|----------------------------------------------------|-----------------------------------------|-----------------|--------------------------------------------------------------------------------------------------------------------------------------------------------------------------------------------------------------------------------------------------------------------------------------|---------------|--------------------------------------------------------------------------------------------------------|--------------------------------------------------------------------------------------------------------|-------------------------------------------------------------------------------------------------------------|-------------------------------------------------------------------------------------------------------------|---------------------------------------------------------------------------------------------------------------------------------------------------------------------------------------------------------------------------------------------------------------------------------------------------------------------------------------------------|------|-----------------|----------|
|                                          |                                 |                                                    |                                         |                 |                                                                                                                                                                                                                                                                                      |               | 6m: 1.30 ± 0.48.                                                                                       | 6m: 3.30 ± 0.48.                                                                                       |                                                                                                             |                                                                                                             | 6m: 24.34 ± 3.30.                                                                                                                                                                                                                                                                                                                                 |      |                 |          |
| <b>Ghasemi2020(Ghasemi et al., 2020)</b> | 36 (SRP+plac:18 ; SRP+prob:18 ) | SRP+plac: 44.35<br>SRP+prob: 44.81                 | SRP+plac: 60%/40%;<br>SRP+prob: 55%/45% | SRP + probiotic | Prokid capsule (15×10 <sup>9</sup> probiotic units per capsule), which contained a combination of bacterial strains, i.e., Bifidobacterium lactis, Lactobacillus acidophilus, Bifidobacterium bifidum, Lactobacillus rhamnosus, which were purchased from Gostaresh Milad Pharmed Co | SRP + placebo | (SRP+plac)<br>Day 0: 5.33±0.69;<br>3m: 4.69±0.69;<br>(SRP+prob)<br>Day 0: 5.31±0.58;<br>3m: 4.25±0.76. | (SRP+plac)<br>Day 0: 5.78±0.57;<br>3m: 4.97±0.68;<br>(SRP+prob)<br>Day 0: 5.65±0.57;<br>3m: 4.29±0.71. | (SRP+plac)<br>Day 0: 48.72±7.71;<br>3m: 20.11±7.54;<br>(SRP+prob)<br>Day 0: 50.76±7.87;<br>3m: 19.59±10.79. | (SRP+plac)<br>Day 0: 47.55±8.14;<br>3m: 23.45±9.17;<br>(SRP+prob)<br>Day 0: 48.95±7.73;<br>3m: 19.46±10.97. | NR                                                                                                                                                                                                                                                                                                                                                | NR   | All non-smokers | 3 months |
| <b>Grover(Grover)</b>                    | 30 (SRP: 15; SRP+prob: 15)      | SRP: 31 ± 8.07 (A)<br>SRP+prob: 33.46 ± 6.63 (B)   | population: 20/7                        | SRP + probiotic | Bifilac lozenges (Streptococcus faecalis T-110 JPC -30 millionCFU; Clostridium butyricum TO-A IHS-2 million CFU; Bacillus mesentericus TO-A JPC-1million CFU;Lactobacillus sporogenes IHS-50 million CFU)                                                                            | SRP alone     | (SRP) Day 0: 9.17 ± 0.75;<br>3m: 8.21 ± 1.08;<br>(SRP+prob)<br>Day 0: 9.45 ± 1.14;<br>3m: 8.16 ± 1.55. | (SRP) Day 0: 4.97 ± 0.61;<br>3m: 4.15 ± 0.73;<br>(SRP+prob)<br>Day 0: 5.54 ± 1.08;<br>3m: 4.62 ± 1.32. | (SRP) Day 0: 1.51 ± 0.40;<br>3m: 1.11 ± 0.15;<br>(SRP+prob)<br>Day 0: 1.59 ± 0.34;<br>3m: 1.20 ± 0.20.      | NR                                                                                                          | (Aa) (SRP)<br>Day 0: 10.57 ± 16.15;<br>3m: 11.07 ± 24.03;<br>(SRP+prob)<br>Day 0: 5.82 ± 10.60;<br>3m: 0 ± 0;<br>(Pg) (SRP)<br>Day 0: 28.29 ± 30.68;<br>3m: 14.36 ± 21.68;<br>(SRP+prob)<br>Day 0: 21.38 ± 22.51;<br>3m: 0 ± 0;<br>(Pi) (SRP)<br>Day 0: 0.71 ± 1.86;<br>3m: 2.57 ± 8.05;<br>(SRP+prob)<br>Day 0: 2.00 ± 5.54;<br>3m: 7.69 ± 27.74 | None | NR              | 3 months |
| <b>Ikram2019(Ikram et al., 2019)</b>     | 67 (SRP+plac: 14; SRP+prob: 14) | SRP+plac: 40.14 ± 2.64;<br>SRP+prob: 41.78 ± 3.58; | SRP+plac: 8/6<br>SRP+prob: 9/5          | SRP + probiotic | L. reuteri (doesn't mention dosage), but protocol has L. reuteri 1.2 billion CFU/g                                                                                                                                                                                                   | SRP + placebo | (SRP+plac)<br>Day 0: 4.12 ± 0.74;<br>84d: 3.86 ± 0.59;<br>(SRP+prob)<br>Day 0: 4.08 ± 0.66;            | (SRP+plac)<br>Day 0: 4.25 ± 1.12;<br>84d: 3.95 ± 0.78;<br>(SRP+prob)<br>Day 0: 4.32 ± 0.91;            | (SRP+plac)<br>Day 0: 84.58 ± 8.06;<br>84d: 33.67 ± 9.47;<br>(SRP+prob)<br>Day 0: 85.23 ± 8.23;              | (SRP+plac)<br>Day 0: 71.94 ± 23.13;<br>84d: 46.24 ± 11.40;<br>(SRP+prob)<br>Day 0: 70.47 ± 11.8;            | NR                                                                                                                                                                                                                                                                                                                                                | NR   | All non-smokers | 84 dias  |

|                                               |                                 |                                                  |                                 |                 |                                                                                                                                                                                       |               |                                                                                                                  |                                                                                                                    |                                                                                                                          |                                                                                                                          |                                                                                                                                                           |                 |                 |         |
|-----------------------------------------------|---------------------------------|--------------------------------------------------|---------------------------------|-----------------|---------------------------------------------------------------------------------------------------------------------------------------------------------------------------------------|---------------|------------------------------------------------------------------------------------------------------------------|--------------------------------------------------------------------------------------------------------------------|--------------------------------------------------------------------------------------------------------------------------|--------------------------------------------------------------------------------------------------------------------------|-----------------------------------------------------------------------------------------------------------------------------------------------------------|-----------------|-----------------|---------|
|                                               |                                 |                                                  |                                 |                 |                                                                                                                                                                                       |               | 84d: 3.24 ± 0.47.                                                                                                | 84d: 2.54 ± 0.52.                                                                                                  | 84d: 26.28 ± 4.12.                                                                                                       | 84d: 13.89 ± 3.25.                                                                                                       |                                                                                                                                                           |                 |                 |         |
| <b>Ince2015(Ince et al., 2015)</b>            | 30 (SRP+plac: 15; SRP+prob: 15) | SRP+plac: 42.20 ± 2.78<br>SRP+prob: 41 ± 3.17    | SRP+plac: 8/7<br>SRP+prob: 9/6  | SRP + probiotic | L. reuteri DSM17938 and L. reuteri ATCC PTA5289 with 10 <sup>8</sup> CFU for each strain (Prodentis, Biogaia, Sweden).                                                                | SRP + placebo | NR                                                                                                               | (SRP+plac)<br>Day 0: 5.57 ± 0.39;<br>360d: 5.01 ± 0.40;<br>(SRP+prob)<br>Day 0: 5.85 ± 0.54;<br>360d: 4.15 ± 0.44. | (SRP+plac)<br>Day 0: 2.23 ± 0.24;<br>360d: 1.43 ± 0.26;<br>(SRP+prob)<br>Day 0: 2.25 ± 0.25;<br>360d: 0.76 ± 0.24.       | (SRP+plac)<br>Day 0: 88.65 ± 4.11;<br>360d: 19.00 ± 5.42;<br>(SRP+prob)<br>Day 0: 88.90 ± 7.66;<br>360d: 11.60 ± 4.35.   | NR                                                                                                                                                        | None            | All non-smokers | 1 year  |
| <b>Invernici2018(Invernici et al., 2018)</b>  | 41 (SRP+plac: 21; SRP+prob: 20) | NR                                               | NR                              | SRP + probiotic | Bifidobacterium animalis subsp. lactis (B. lactis) HN019 (HOWARU® Bifido LYO 40 DCUS, DuPont™ Danisco® Sweeteners Oy, Kantvik, Finland) (10 <sup>9</sup> colony-forming units (CFUs)) | SRP + placebo | (SRP+plac)<br>Day 0: 3.42 ± 0.54;<br>90d: 3.24 ± 0.51;<br>(SRP+prob)<br>Day 0: 3.26 ± 0.39;<br>90d: 2.77 ± 0.38. | (SRP+plac)<br>Day 0: 3.10 ± 0.43;<br>90d: 2.85 ± 0.34;<br>(SRP+prob)<br>Day 0: 3.01 ± 0.27;<br>90d: 2.49 ± 0.27.   | (SRP+plac)<br>Day 0: 26.71 ± 16.60;<br>90d: 27.14 ± 18.64;<br>(SRP+prob)<br>Day 0: 23.85 ± 15.33;<br>90d: 21.65 ± 13.13. | (SRP+plac)<br>Day 0: 35.00 ± 25.84;<br>90d: 30.71 ± 27.86;<br>(SRP+prob)<br>Day 0: 30.80 ± 22.07;<br>90d: 18.80 ± 16.14. | NR                                                                                                                                                        | None            | All non-smokers | 90 days |
| <b>Invernici2020(Invernici et al., 2020)</b>  | 30 (SRP+plac: 15; SRP+prob: 15) | SRP+plac: 47.67 ± 9.49<br>SRP+prob: 47.60 ± 9.97 | SRP+plac: 8/7<br>SRP+prob: 5/10 | SRP + probiotic | 10 <sup>9</sup> colony-forming units (CFUs) of B. lactis HN019 (HOWARU1 Bifido LYO 40 DCU-S, DuPont™ Danisco1 Sweeteners Oy, Kantvik, Finland)                                        | SRP + placebo | NR                                                                                                               | NR                                                                                                                 | (SRP+plac)<br>Day 0: 22.50 ± 8.54;<br>90d: 22.66 ± 9.99;<br>(SRP+prob)<br>Day 0: 18.71 ± 12.14;<br>90d: 18.27 ± 17.11.   | (SRP+plac)<br>Day 0: 14.07 ± 7.99;<br>90d: 12.10 ± 8.19;<br>(SRP+prob)<br>Day 0: 9.17 ± 7.71;<br>90d: 5.92 ± 6.12.       | NR                                                                                                                                                        | None            | All non-smokers | 90 days |
| <b>Jebin2021(Jebin et al., 2021)</b>          | 27 (SRP:13; SRP+prob:14)        | SRP: 37.8 ± 7.90<br>SRP+prob: 37.5 ± 7.12        | SRP: 10/3<br>SRP+prob:11/3      | SRP + probiotic | L. reuteri UBLRu-87, 0.5 billion CFU, Unique Biotech Ltd, Hyderabad, India                                                                                                            | SRP alone     | (SRP) Day 0: 4.17 ± 0.20;<br>3m: 3.50 ± 0.21;<br>(SRP+prob)<br>Day 0: 3.99 ± 0.56;<br>3m: 2.97 ± 0.35.           | (SRP) Day 0: 5.20 ± 0.40;<br>3m: 4.35 ± 0.38;<br>(SRP+prob)<br>Day 0: 5.27 ± 0.49;<br>3m: 3.6 ± 0.56.              | (SRP) Day 0: 1.80 ± 0.32;<br>3m: 1.28 ± 0.23;<br>(SRP+prob)<br>Day 0: 1.69 ± 0.36;<br>3m: 0.95 ± 0.19.                   | NR                                                                                                                       | None                                                                                                                                                      | All non-smokers | 3 months        |         |
| <b>Kanagaraj2019(Kanagara j et al., 2019)</b> | 60 (SRP+plac: 30; SRP+prob: 30) | 25-50                                            | NR                              | SRP + probiotic | BIFILAC-lozenges) contains Lactobacillus sporogenes 100 million, Streptococcus faecalis T-110 JPC 60 million, Clostridium butyrium TO-A 4 million                                     | SRP + placebo | (SRP+plac)<br>Day 0: 3.09 ± 0.21;<br>6w: 1.27 ± 0.38;<br>(SRP+prob)<br>Day 0: 3.05 ± 0.13;<br>6w: 0.50 ± 0.47.   | (SRP+plac)<br>Day 0: 5.13 ± 0.10;<br>6w: 2.50 ± 0.54;<br>(SRP+prob)<br>Day 0: 5.19 ± 0.14;<br>6w: 1.69 ± 0.57.     | (SRP+plac)<br>Day 0: 2.12 ± 0.51;<br>6w: 1.92 ± 0.43;<br>(SRP+prob)<br>Day 0: 2.15 ± 0.48;<br>6w: 1.04 ± 0.51.           | (SRP+plac)<br>Day 0: 2.30 ± 0.47;<br>6w: 1.96 ± 0.43;<br>(SRP+prob)<br>Day 0: 2.24 ± 0.42;<br>6w: 1.13 ± 0.49.           | In evaluating the presence of Porphyromon as gingivalis, more positive bands of P gingivalis was seen in both Group I and Group II at Day 0 and there was | None            | All non-smokers | 6 weeks |

|                                                      |                                                |                                                                             |                                                  |                                                                                         |                                                                                                                                                                                                            |                  |                                                                                                                                                                             |                                                                                                                                                                             |                                                                                                                                                                             |                                                                                                                                                                                         |                                                                                                     |      |                 |                 |         |
|------------------------------------------------------|------------------------------------------------|-----------------------------------------------------------------------------|--------------------------------------------------|-----------------------------------------------------------------------------------------|------------------------------------------------------------------------------------------------------------------------------------------------------------------------------------------------------------|------------------|-----------------------------------------------------------------------------------------------------------------------------------------------------------------------------|-----------------------------------------------------------------------------------------------------------------------------------------------------------------------------|-----------------------------------------------------------------------------------------------------------------------------------------------------------------------------|-----------------------------------------------------------------------------------------------------------------------------------------------------------------------------------------|-----------------------------------------------------------------------------------------------------|------|-----------------|-----------------|---------|
|                                                      |                                                |                                                                             |                                                  |                                                                                         | and <i>Bacillus mesentericus</i> TO-A JPC 2 million.                                                                                                                                                       |                  |                                                                                                                                                                             |                                                                                                                                                                             |                                                                                                                                                                             |                                                                                                                                                                                         | much reduction after 3 weeks in Group II after post therapy compared to Group I as shown in Fig. 3. |      |                 |                 |         |
| <b>Kumar2021(Kumar et al., 2021)</b>                 | 48 (SRP+plac: 15; SRP+prob: 15; SRP+pprob: 15) | SRP+plac: 42.87 ± 3.42<br>SRP+prob: 41.79 ± 2.37<br>SRP+pprob: 39.74 ± 2.97 | SRP+plac: 7/8<br>SRP+prob: 6/9<br>SRP+pprob: 8/7 | SRP+single application of probiotic (G2); SRP+incremental application of probiotic (G3) | 5.9 billion CFU of <i>L. reuteri</i> per gram and maltodextrin as a carrier (batch No. LR 12, Meteoric Lifesciences, Ahmedabad, India)                                                                     | SRP+placebo (G1) | (SRP+plac)<br>Day 0: 5.92 ± 0.65;<br>24w: 4.79 ± 0.90;<br>(SRP+prob)<br>Day 0: 6.27 ± 0.75;<br>24w: 4.82 ± 0.60;<br>(SRP+pprob)<br>Day 0: 6.44 ± 0.79;<br>24w: 4.88 ± 0.58. | (SRP+plac)<br>Day 0: 6.72 ± 0.63;<br>24w: 5.08 ± 0.50;<br>(SRP+prob)<br>Day 0: 6.78 ± 0.72;<br>24w: 4.92 ± 0.58;<br>(SRP+pprob)<br>Day 0: 6.63 ± 0.75;<br>24w: 4.91 ± 0.73. | (SRP+plac)<br>Day 0: 2.08 ± 0.18;<br>24w: 0.70 ± 0.40;<br>(SRP+prob)<br>Day 0: 2.10 ± 0.23;<br>24w: 0.73 ± 0.24;<br>(SRP+pprob)<br>Day 0: 2.20 ± 0.43;<br>24w: 0.46 ± 0.19. | (SRP+plac)<br>Day 0: 81.67 ± 19.97;<br>24w: 43.33 ± 22.09;<br>(SRP+prob)<br>Day 0: 93.33 ± 11.44;<br>24w: 35.00 ± 22.76;<br>(SRP+pprob)<br>Day 0: 92.86 ± 15.28;<br>24w: 31.21 ± 15.39. | NR                                                                                                  | None | All non-smokers | 24 weeks        |         |
| <b>Laleman2015(Laleman et al., 2015)</b>             | 48 (SRP+plac: 24; SRP+prob: 24)                | SRP+plac: 46.0 ± 5.0<br>SRP+prob: 47.0 ± 5.0                                | SRP+plac: 14/10<br>SRP+prob: 12/12               | SRP + probiotic                                                                         | <i>S. oralis</i> KJ3, <i>S. uberis</i> KJ2 and <i>S. rattus</i> JH145 (Probiora3,;O ragenics, Alachua, FL, USA) were added (at least 108 CFU of each strain/tablet)                                        | SRP + placebo    | (SRP+plac)<br>Day 0: 5.36 ± 0.45;<br>24w: 4.60 ± 0.48;<br>(SRP+prob)<br>Day 0: 5.22 ± 0.41;<br>24w: 4.51 ± 0.41.                                                            | (SRP+plac)<br>Day 0: 4.59 ± 0.52;<br>24w: 2.98 ± 0.47;<br>(SRP+prob)<br>Day 0: 4.50 ± 0.51;<br>24w: 2.99 ± 0.47.                                                            | NR                                                                                                                                                                          | (SRP+plac)<br>Day 0: 85.55 ± 7.29<br>24w: 30.11 ± 10.36;<br>(SRP+prob)<br>Day 0: 87.44 ± 6.03;<br>24w: 26.98 ± 9.34.                                                                    | NR                                                                                                  | None | NR              | 24 weeks        |         |
| <b>Meenakshi2020(Meenakshi &amp; Varghese, 2018)</b> | 20 (SRP:10; SRP+prob:10)                       | NR                                                                          | NR                                               | SRP + probiotic                                                                         | Yakult containing <i>Lactobacillus casei</i> strain Shirota                                                                                                                                                | SRP alone        | (SRP) Day 0: 4.89±0.55;<br>1m: 4.54±0.53;<br>(SRP+prob)<br>Day 0: 4.95±0.40;<br>1m: 4.01±0.53.                                                                              | (SRP) Day 0: 4.46±0.75;<br>1m: 4.14±0.66;<br>(SRP+prob)<br>Day 0: 4.57±0.51;<br>1m: 3.43±0.39.                                                                              | (SRP) Day 0: 1.76±0.41;<br>1m: 1.40±0.35;<br>(SRP+prob)<br>Day 0: 1.93±0.40;<br>1m: 0.80±0.35.                                                                              | NR                                                                                                                                                                                      | (SRP) Day 0: 163.9±37.6;<br>1m: 122.5±28.6;<br>(SRP+prob)<br>Day 0: 169.4±34.7;<br>1m: 98.9±16.2.   | NR   | NR              | All non-smokers | 1 month |
| <b>Minic2020(Minic et al., 2022)</b>                 | 80 (SRP: 40; SRP+prob: 40)                     | 35-55                                                                       | NR                                               | SRP + probiotic                                                                         | 6.5 billion live <i>Lactobacillus acidophilus</i> , concentration of 10 <sup>7</sup> CFU, at least 107 CFU <i>Bifidobacterium infantis</i> and at least 106 CFU <i>Enterococcus faecium</i> colony-forming | SRP alone        | NR                                                                                                                                                                          | (SRP) Day 0: 5.22 ± 0.56;<br>30d: 4.72 ± 0.36;<br>(SRP+prob)<br>Day 0: 5.30 ± 0.46;<br>30d: 4.08 ± 0.22.                                                                    | (SRP) Day 0: 1.92 ± 0.53;<br>30d: 0.61 ± 0.03;<br>(SRP+prob)<br>Day 0: 2.00 ± 0.56;<br>30d: 0.10 ± 0.04.                                                                    | (SRP) Day 0: 1.87 ± 0.38;<br>30d: 0.82 ± 0.13;<br>(SRP+prob)<br>Day 0: 1.80 ± 0.35;<br>30d: 0.18 ± 0.06.                                                                                | NR                                                                                                  | None | NR              | 30 days         |         |



|                                             |                                 |                                                |                                  |                 |                                                                                                  |               |                                                                                                                      |                                                                                                                   |                                                                                                                     |                                                                                                                        |                                                                                                                                        |                                                                                                                                                                                                                                                                                                                                                                          |                 |           |
|---------------------------------------------|---------------------------------|------------------------------------------------|----------------------------------|-----------------|--------------------------------------------------------------------------------------------------|---------------|----------------------------------------------------------------------------------------------------------------------|-------------------------------------------------------------------------------------------------------------------|---------------------------------------------------------------------------------------------------------------------|------------------------------------------------------------------------------------------------------------------------|----------------------------------------------------------------------------------------------------------------------------------------|--------------------------------------------------------------------------------------------------------------------------------------------------------------------------------------------------------------------------------------------------------------------------------------------------------------------------------------------------------------------------|-----------------|-----------|
|                                             |                                 |                                                |                                  |                 | units per capsule                                                                                |               |                                                                                                                      |                                                                                                                   |                                                                                                                     |                                                                                                                        |                                                                                                                                        |                                                                                                                                                                                                                                                                                                                                                                          |                 |           |
| <b>Morales2016 (Morales et al., 2016)</b>   | 28 (SRP+plac: 14; SRP+prob:14)  | SRP+plac: 46.9 ± 10.3<br>SRP+prob: 52.7 ± 7.3  | SRP+plac: 7/7<br>SRP+prob: 7/7   | SRP + probiotic | L. rhamanosus SP1 (2 × 10 <sup>7</sup> CFU/day) (Macrofood SA, Santiago, Chile)                  | SRP + placebo | (SRP+plac)<br>Day 0: 4.9 ± 1.3;<br>12m: 4.8 ± 1.3;<br>(SRP+prob)<br>Day 0: 4.2 ± 0.9;<br>12m: 4.1 ± 1.0.             | (SRP+plac)<br>Day 0: 2.5 ± 0.3;<br>12m: 2.0 ± 0.2;<br>(SRP+prob)<br>Day 0: 2.7 ± 0.6;<br>12m: 2.1 ± 0.5.          | (SRP+plac)<br>Day 0: 52.1 ± 20.7;<br>12m: 35.5 ± 11.4;<br>(SRP+prob)<br>Day 0: 63.1 ± 18.59.<br>12m: 33.1 ± 21.3.   | (SRP+plac)<br>Day 0: 33.8 ± 16.1;<br>12m: 25.4 ± 10.3;<br>(SRP+prob)<br>Day 0: 41.1 ± 16.3;<br>12m: 29.3 ± 12.7.       | NR                                                                                                                                     | None                                                                                                                                                                                                                                                                                                                                                                     | NR              | 12 months |
| <b>Oliveira2021 (Oliveira et al., 2021)</b> | 48 (SRP+plac: 23; SRP+prob: 19) | SRP+plac: 53.0 (12.0)<br>SRP+prob: 49.0 (10.0) | SRP+plac: 9/14<br>SRP+prob: 10/9 | SRP + probiotic | The probiotic selected * contained 5 strains of Lactobacillus spp. and 3 of Bifidobacterium spp. | SRP + placebo | (SRP+plac)<br>Day 0: 3.18 (1.06);<br>2m: 2.89 (0.96);<br>(SRP+prob)<br>Day 0: 3.31 (1.12);<br>2m: 2.74 (1.14).       | (SRP+plac)<br>Day 0: 2.82 (0.62);<br>2m: 2.24 (0.28);<br>(SRP+prob)<br>Day 0: 3.00 (0.49);<br>2m: 2.36 (0.43).    | (SRP+plac)<br>Day 0: 62.10 (20);<br>2m: 44.90 (19.10);<br>(SRP+prob)<br>Day 0: 61.30 (22.10);<br>2m: 47.90 (22.40). | (SRP+plac)<br>Day 0: 45.10 (22.05);<br>2m: 24.70 (19.90);<br>(SRP+prob)<br>Day 0: 53.30 (32.60);<br>2m: 32.20 (23.10). | Change in mean counts, but only in graphics<br>Not reported on other way                                                               | The 42 individuals who finished the study reported full adherence to the prescribed products, but 3 did not fill the side effects form correctly. Most patients reported feeling well during treatments; however, gastrointestinal symptoms were more frequently reported in the probiotic than placebo group, in particular the occurrence of soft stools. Median (IQR) | NR              | 2 months  |
| <b>Özener2023( Ozener et al., 2023)</b>     | 30 (SRP+plac: 15; SRP+prob: 15) | SRP+plac: 42.27±8.8;<br>SRP+prob: 41.40±6.8    | SRP+plac:7/8<br>SRP+prob:8/7     | SRP + probiotic | B. lactis DN-173010, ≥10 <sup>8</sup> CFU                                                        | SRP + placebo | (SRP+plac)<br>Day 0: 2.67±0.46;<br>3m: 2.16±0.43;<br>(SRP+prob)<br>Day 0: 2.93±0.37;<br>3m: 2.26±0.45.               | (SRP+plac)<br>Day 0: 2.59±0.43;<br>3m: 2.06±0.35c;<br>(SRP+prob)<br>Day 0: 2.76±0.38;<br>3m: 2.05±0.36.           | (SRP+plac)<br>Day 0: 1.79±0.36 ;<br>3m: 0.35±0.22 ;<br>(SRP+prob)<br>Day 0: 1.81±0.23;<br>3m: 0.18±0.08.            | (SRP+plac)<br>Day 0: 49.16±15.09;<br>3m: 22.34±5.23;<br>(SRP+prob)<br>Day 0: 52.70±21.98;<br>3m: 10.58±3.16.           | (SRP+plac)<br>Day 0: 75.64±42.72;<br>3m: 24.90±28.31;<br>(SRP+prob)<br>Day 0: 93.95±76.18;<br>3m: 31.95±39.62.                         | None                                                                                                                                                                                                                                                                                                                                                                     | All non-smokers | 3 months  |
| <b>Paul2019(Paul et al., 2019)</b>          | 30 (SRP+plac: 13; SRP+prob:14)  | 38.1                                           | 13/17                            | SRP + probiotic | Lactobacillus brevis (dosage not reported)                                                       | SRP + placebo | (SRP+plac)<br>Day 0: 3.584 ± 0.73;<br>12w: 2.776 ± 0.71;<br>(SRP+prob)<br>Day 0: 3.580 ± 1.00;<br>12w: 3.133 ± 1.15. | (SRP+plac)<br>Day 0: 3.420 ± 0.77;<br>12w: 2.617 ± 0.97;<br>(SRP+prob)<br>Day 0: 3.280 ± 0.83; 12w: 2.573 ± 0.60. | (SRP+plac)<br>Day 0: 1.138 ± 0.78;<br>12w: 0.604 ± 0.38;<br>(SRP+prob)<br>Day 0: 1.274 ± 0.63; 12w: 0.636 ± 0.32.   | (SRP+plac)<br>Day 0: 0.902 ± 0.17;<br>12w: 0.540 ± 0.24;<br>(SRP+prob)<br>Day 0: 0.871 ± 0.30; 12w: 0.714 ± 0.22.      | (Aa)<br>(SRP+plac)<br>Day 0: 10500 ± 14740;<br>12w: 0 ± 0;<br>(SRP+prob)<br>Day 0: 19000 ± 41160;<br>12w: 0 ± 0;<br>(Pg)<br>(SRP+plac) | None                                                                                                                                                                                                                                                                                                                                                                     | All non-smokers | 12 weeks  |

|                                           |                                 |                                                  |                                    |                 |                                                                                                                                                                                                                                                              |               |                                                                                                                            |                                                                                                                            |                                                                                                                                    |                                                                                                                                       |                                                                                                                                                                                                                 |                                                |                         |          |
|-------------------------------------------|---------------------------------|--------------------------------------------------|------------------------------------|-----------------|--------------------------------------------------------------------------------------------------------------------------------------------------------------------------------------------------------------------------------------------------------------|---------------|----------------------------------------------------------------------------------------------------------------------------|----------------------------------------------------------------------------------------------------------------------------|------------------------------------------------------------------------------------------------------------------------------------|---------------------------------------------------------------------------------------------------------------------------------------|-----------------------------------------------------------------------------------------------------------------------------------------------------------------------------------------------------------------|------------------------------------------------|-------------------------|----------|
|                                           |                                 |                                                  |                                    |                 |                                                                                                                                                                                                                                                              |               |                                                                                                                            |                                                                                                                            |                                                                                                                                    |                                                                                                                                       | Day 0: 12400 ± 10400;<br>12w: 0 ± 0;<br>(SRP+prob)<br>Day 0: 18400 ± 23000;<br>12w: 538 ± 1050;<br>(Pi)<br>(SRP+plac)<br>Day 0: 4181 ± 8931;<br>12w: 0 ± 0;<br>(SRP+prob)<br>Day 0: 1846 ± 3105;<br>12w: 0 ± 0; |                                                |                         |          |
| <b>Pelekos2020( Pelekos et al., 2020)</b> | 59 (SRP+plac: 20; SRP+prob: 20) | SRP+plac: 52.76<br>SRP+prob: 51.14               | SRP+plac: 10/10<br>SRP+prob: 4/16  | SRP + probiotic | L. reuteri DSM17938 and L. reuteri ATCC PTA5289 with 10 <sup>8</sup> CFU for each strain (Prodentis, Biogaia, Sweden).                                                                                                                                       | SRP + placebo | (SRP+plac)<br>Day 0: 8.02 ± 2.32;<br>180d: 7.50 ± 2.58;<br>(SRP+prob)<br>Day 0: 7.61 ± 1.99;<br>180d: 7.07 ± 2.20.         | (SRP+plac)<br>Day 0: 6.38 ± 1.68;<br>180d: 4.97 ± 1.91;<br>(SRP+prob)<br>Day 0: 5.95 ± 1.19;<br>180d: 4.55 ± 1.37.         | NR                                                                                                                                 | (SRP+plac)<br>Day 0: 221(93.2%);<br>180d: 145 (61.2%);<br>(SRP+prob)<br>Day 0: 184 (87.6%);<br>180d: 110 (52.4%).                     | NR                                                                                                                                                                                                              | NR                                             | All non-smokers         | 180 days |
| <b>Penala2016( Penala et al., 2016)</b>   | 29 (SRP+plac: 14; SRP+prob: 15) | SRP+plac: 35.5 ± 9.17<br>SRP+prob: 37.2 ± 9.79   | NR                                 | SRP + probiotic | Lactobacillus salivarius (2 × 10 <sup>9</sup> CFU) and Lactobacillus reuteri (2 × 10 <sup>9</sup> CFU) per capsule                                                                                                                                           | SRP + placebo | (SRP+plac)<br>Day 0: 2.88 ± 0.40;<br>3m: gráfico;<br>(SRP+prob)<br>Day 0: 2.98 ± 0.78;<br>3m: gráfico.                     | (SRP+plac)<br>Day 0: 3.19 ± 0.44;<br>3m: gráfico;<br>(SRP+prob)<br>Day 0: 3.12 ± 0.71;<br>3m: gráfico.                     | (SRP+plac)<br>Day 0: 2.16 ± 0.35;<br>3m: 0.72 ± 0.39;<br>(SRP+prob)<br>Day 0: 1.81 ± 0.47;<br>3m: 0.35 ± 0.18.                     | (SRP+plac)<br>Day 0: 1.79 ± 0.11;<br>3m: 0-71 ± 0.43.<br>(SRP+prob)<br>Day 0: 1.65 ± 0.38;<br>3m: 0.31 ± 0.14.                        | NR                                                                                                                                                                                                              | None                                           | All non-smokers         | 3 months |
| <b>Pudgar2021( Pudgar et al., 2021)</b>   | 40 (SRP+plac: 20; SRP+prob: 20) | SRP+plac: 46.7 (11.0)<br>SRP+prob: 45.9 (8.0)    | SRP+plac: 11/9<br>SRP+prob: 7/13   | SRP + probiotic | 6.0 × 10 <sup>9</sup> CFU/ml of L. brevis (CECT7480) [8] and 6.0 × 10 <sup>9</sup> CFU/ml of L. plantarum (CECT7481) [8], while the probiotic lozenges contained 1.2 × 10 <sup>9</sup> CFU/ml of each bacterium (ProlacSan, CMS Dental, Copenhagen, Denmark) | SRP + placebo | (SRP+plac)<br>Day 0: 4.5 (4.0; 5.9);<br>3m: 3.7 (3.3; 4.9);<br>(SRP+prob)<br>Day 0: 4.3 (3.8; 4.9);<br>3m: 3.6 (3.1; 4.2). | (SRP+plac)<br>Day 0: 4.0 (3.6; 4.3);<br>3m: 3.1 (2.8; 3.3);<br>(SRP+prob)<br>Day 0: 3.9 (3.7; 4.2);<br>3m: 3.0 (2.9; 3.2). | (SRP+plac)<br>Day 0: 23.5 (14.0; 36.5)<br>3m: 12.5 (5.5; 23.5);<br>(SRP+prob)<br>Day 0: 24.5 (17.5; 38.0);<br>3m: 9.0 (6.0; 13.5). | (SRP+plac)<br>Day 0: 63.0 (44.0; 74.5)<br>3m: 24.5 (15.5; 30.0);<br>(SRP+prob)<br>Day 0: 63.0 (45.0; 77.5);<br>3m: 27.0 (18.5; 31.0). | NR                                                                                                                                                                                                              | None                                           | Smokers and non-smokers | 3 months |
| <b>Ranjith2021( Ranjith et al., 2022)</b> | 60 (SRP+plac: 27;               | SRP+plac: 37.95 ± 6.94<br>SRP+prob: 39.48 ± 7.65 | SRP+plac: 16/14<br>SRP+prob: 17/13 | SRP + probiotic | Darolac, Aristo pharmaceuticals, India                                                                                                                                                                                                                       | SRP + placebo | (SRP+plac)<br>Day 0: 2.9 ± 0.16;<br>90d: 2.72 ±                                                                            | (SRP+plac)<br>Day 0: 3.0 ± 0.16;<br>90d: 2.74 ±                                                                            | (SRP+plac)<br>Day 0: 1.57 ± 0.87;<br>90d: 1.06 ±                                                                                   | NR                                                                                                                                    | NR                                                                                                                                                                                                              | No adverse events were reported and compliance | All non-smokers         | 90 days  |

|                                            |                                 |                                            |                                |                 |                                                                                                                                          |               |                                                                                                   |                                                                                                     |                                                                                                       |                                                                                                               |                                                                                                                                                                                                                                                                                                                                                                                                          |                                  |                 |          |
|--------------------------------------------|---------------------------------|--------------------------------------------|--------------------------------|-----------------|------------------------------------------------------------------------------------------------------------------------------------------|---------------|---------------------------------------------------------------------------------------------------|-----------------------------------------------------------------------------------------------------|-------------------------------------------------------------------------------------------------------|---------------------------------------------------------------------------------------------------------------|----------------------------------------------------------------------------------------------------------------------------------------------------------------------------------------------------------------------------------------------------------------------------------------------------------------------------------------------------------------------------------------------------------|----------------------------------|-----------------|----------|
|                                            | SRP+prob: 28)                   |                                            |                                |                 | containing 1 g powder of 1.25 billion freeze-dried combination of a mixture of L. acidophilus, L. rhamnosus, B. longum and S. boulardii. |               | 0.10; (SRP+prob) Day 0: 3.48 ± 0.2; 90d: 2.25 ± 0.11.                                             | 0.15; (SRP+prob) Day 0: 3.4 ± 0.28; 90d: 2.65 ± 0.11.                                               | 0.06; (SRP+prob) Day 0: 1.7 ± 0.87; 90d: 1.09 ± 0.07. (Silness & Loe)                                 |                                                                                                               |                                                                                                                                                                                                                                                                                                                                                                                                          | was satisfactory in both groups. |                 |          |
| <b>Tekce2015(Tekce et al., 2015)</b>       | 40 (SRP+plac: 20; SRP+prob: 20) | SRP+plac: 41.40 ± 8.86 SRP+prob: 43 ± 5.01 | SRP+plac: 10/10 SRP+prob: 8/12 | SRP + probiotic | L. reuteri (1x10 <sup>8</sup> CFU) for DSM17938 and ATCC PTA5289 (Prodentis; BioGaia, Lund, Sweden)                                      | SRP + placebo | NR                                                                                                | (SRP+plac) Day 0: 5.36 ± 0.72; 360d: 4.80 ± 0.70; (SRP+prob) Day 0: 5.23 ± 0.68; 360d: 3.49 ± 0.87. | (SRP+plac) Day 0: 2.30 ± 0.41; 360d: 1.39 ± 0.28; (SRP+prob) Day 0: 2.29 ± 0.28; 360d: 0.73 ± 0.24.   | (SRP+plac) Day 0: 88.65 ± 4.11; 360d: 19.05 ± 4.84; (SRP+prob) Day 0: 88.90 ± 7.66; 360d: 11.05 ± 3.99.       | (SRP+plac) Day 0: 41.5 (14–81); 360d: 40.5 (12–78); (SRP+prob) Day 0: 35.5 (26–43); 360d: 35 (25–42).                                                                                                                                                                                                                                                                                                    | None                             | All non-smokers | 360 dyas |
| <b>Teughels2013(Teughels et al., 2013)</b> | 30 (SRP+plac: 15; SRP+prob: 15) | SRP+plac: 45.7 ± 6.2 SRP+prob: 46.6 ± 4.5  | SRP+plac: 8/7 SRP+prob: 7/8    | SRP + probiotic | L. reuteri (1x10 <sup>8</sup> CFU) for DSM17938 and ATCC PTA5289 (Prodentis; BioGaia, Lund, Sweden)                                      | SRP + placebo | (SRP+plac) Day 0: 4.97 ± 0.61; 12w: 4.21 ± 0.67; (SRP+prob) Day 0: 4.97 ± 1.01; 12w: 3.97 ± 0.97. | (SRP+plac) Day 0: 4.32 ± 0.50; 12w: 2.93 ± 0.40; (SRP+prob) Day 0: 4.15 ± 0.71; 12w: 2.73 ± 0.57.   | (SRP+plac) Day 0: 99.66 ± 0.99; 12w: 24.88 ± 33.26; (SRP+prob) Day 0: 95 ± 10.27; 12w: 16.34 ± 19.19. | (SRP+plac) Day 0: 67.53% ± 11.37; 12w: 16.58% ± 10.54; (SRP+prob) Day 0: 70.70% ± 14.53; 12w: 15.51% ± 11.92. | (Aa) (SRP+plac) Day 0: 3.57 ± 1.97; 12w: 1.86 ± 2.12; (SRP+prob) Day 0: 3.84 ± 2.70; 12w: 1.98 ± 2.38; (Fn) (SRP+plac) Day 0: 7.40 ± 1.16; 12w: 5.87 ± 1.08; (SRP+prob) Day 0: 7.70 ± 1.11; 12w: 5.45 ± 2.05; (Pg) (SRP+plac) Day 0: 6.37 ± 1.7; 12w: 5.43 ± 1.73; (SRP+prob) Day 0: 6.67 ± 1.5; 12w: 4.87 ± 1.21; (Pi) (SRP+plac) Day 0: 6.17 ± 2.73; 12w: 4.81 ± 2.44; (SRP+prob) Day 0: 6.345 ± 2.14; | None                             | All non-smokers | 12 weeks |

|                                            |                                             |                                                                        |                                       |                                                                                               |                                                                                                                                                  |                                                                                                                |                                                                                                                  |                                                                                                                                                                                                                                          |                                                                                                                      |                                                                                                                          |                                                                                                                                                                                                                                                                                  |      |                     |         |  |
|--------------------------------------------|---------------------------------------------|------------------------------------------------------------------------|---------------------------------------|-----------------------------------------------------------------------------------------------|--------------------------------------------------------------------------------------------------------------------------------------------------|----------------------------------------------------------------------------------------------------------------|------------------------------------------------------------------------------------------------------------------|------------------------------------------------------------------------------------------------------------------------------------------------------------------------------------------------------------------------------------------|----------------------------------------------------------------------------------------------------------------------|--------------------------------------------------------------------------------------------------------------------------|----------------------------------------------------------------------------------------------------------------------------------------------------------------------------------------------------------------------------------------------------------------------------------|------|---------------------|---------|--|
|                                            |                                             |                                                                        |                                       |                                                                                               |                                                                                                                                                  |                                                                                                                |                                                                                                                  |                                                                                                                                                                                                                                          |                                                                                                                      |                                                                                                                          | 12w: 4.22 ± 2.07;<br>(Tf)<br>(SRP+plac)<br>Day 0: 6.56 ± 0.89;<br>12w: 5.24 ± 1.17;<br>(SRP+prob)<br>Day 0: 5.95 ± 1.82<br>12w: 8.49 ± 0.82;<br>(Total load)<br>(SRP+plac)<br>Day 0: 10.11 ± 0.86;<br>12w: 8.99 ± 0.99;<br>(SRP+prob)<br>Day 0: 9.9 ± 0.52;<br>12w: 8.49 ± 0.82; |      |                     |         |  |
| <b>Theodoro2019(Theodoro et al., 2019)</b> | 34<br>(SRP+plac: 14;<br>SRP+prob: 14)       | SRP+plac:<br>45.07 ± 6.31<br>SRP+prob:<br>47.25 ± 7.10                 | SRP+plac:<br>10/4<br>SRP+prob:<br>5/9 | SRP +<br>probiotic                                                                            | L. reuteri<br>DSM 17938,<br>with 1×10 <sup>8</sup><br>cfu<br>(BioGaia™,<br>450 mg,<br>Laboratórios<br>Ferring Ltda,<br>São Paulo,<br>SP, Brazil) | SRP +<br>placebo                                                                                               | (SRP+plac)<br>Day 0: 4.23 ± 0.56;<br>90d: 4.17 ± 0.42;<br>(SRP+prob)<br>Day 0: 4.39 ± 0.86;<br>90d: 3.96 ± 0.89. | (SRP+plac)<br>Day 0: 3.81 ± 0.44;<br>90d: 3.66 ± 0.36;<br>(SRP+prob)<br>Day 0: 3.23 ± 0.44;<br>90d: 2.98 ± 0.54.                                                                                                                         | NR                                                                                                                   | (SRP+plac)<br>Day 0: 74.10 ± 22.08;<br>90d: 65.13 ± 20.65;<br>(SRP+prob)<br>Day 0: 45.74 ± 20.65;<br>90d: 23.51 ± 14.15. | NR                                                                                                                                                                                                                                                                               | None | All smokers         | 90 days |  |
| <b>Tsubura2009 (Tsubura et al., 2009)</b>  | 54<br>(SRP+cont:27<br>;<br>SRP+prob:<br>27) | 53.4 (44-62)                                                           | 21/33                                 | SRP +<br>probiotic<br>(Extraction<br>300E<br>(containing<br>Bacillus<br>subtilis: E-<br>300 ) | Bacillus<br>subtilis                                                                                                                             | SRP + control<br>(NG -<br>Neosteline<br>Green (NG),<br>containing<br>benzethonium<br>chloride 0.2<br>g/100 ml) | NR                                                                                                               | (SRP+cont)<br>Day 0:<br>4.7±0.72;<br>30d:<br>3.5±0.51;<br>(SRP+prob)<br>Day 0:<br>4.8±0.75;<br>30d:<br>4.2±0.60.                                                                                                                         | NR                                                                                                                   | (SRP+cont)<br>Day 0:<br>1.6±0.50;<br>30d:<br>0.8±0.62;<br>(SRP+prob)<br>Day 0:<br>1.6±0.51;<br>30d:<br>0.5±0.51.         | NR                                                                                                                                                                                                                                                                               | NR   | All non-<br>smokers | 30 days |  |
| <b>Vicario2013( Vicario et al., 2013)</b>  | 19<br>(SRP+plac: 9;<br>SRP+prob:<br>10)     | SRP+plac:<br>53.8 (44.3–<br>63.1)<br>SRP+prob:<br>58.0 (51.4–<br>64.7) | SRP+plac:<br>4/5<br>SRP+prob:<br>8/2  | SRP +<br>probiotic                                                                            | Lactobacillus<br>reuteri<br>(ATCC 55730<br>and<br>ATCCPTA<br>5289)<br>(2X10 <sup>8</sup><br>living cells of<br>L.reuteri<br>Prodentis)           | SRP +<br>placebo                                                                                               | NR                                                                                                               | % sites with<br>pocket<br>probing<br>depths 4–5<br>mm.<br>(SRP+plac)<br>Day 0: 38.1 ± 16.37;<br>30d: 45.3 ± 10.38;<br>(SRP+prob)<br>Day 0: 50.1 ± 17.92;<br>30d: 40.4 ± 17.76.<br>% sites with<br>pocket<br>probing<br>depths ≥ 6<br>mm. | (SRP+plac)<br>Day 0: 62.9 ± 24.21;<br>30d: 67.4 ± 16.57;<br>(SRP+prob)<br>Day 0: 69.5 ± 16.95;<br>30d: 52.5 ± 14.25. | (SRP+plac)<br>Day 0: 40.0 ± 23.36;<br>30d: 47.0 ± 17.43;<br>(SRP+prob)<br>Day 0: 55.3 ± 16.39;<br>30d: 29.3 ± 15.04.     | NR                                                                                                                                                                                                                                                                               | None | All non-<br>smokers | 30 days |  |

|  |  |  |  |  |  |  |  |  |                                                                                                                                 |  |  |  |  |  |  |  |  |  |  |
|--|--|--|--|--|--|--|--|--|---------------------------------------------------------------------------------------------------------------------------------|--|--|--|--|--|--|--|--|--|--|
|  |  |  |  |  |  |  |  |  | (SRP+plac)<br>Day 0: 13.7 ±<br>16.42;<br>30d: 13.4 ±<br>13.31;<br>(SRP+prob)<br>Day 0: 12.3 ±<br>16.13;<br>30d: 7.5 ±<br>11.40. |  |  |  |  |  |  |  |  |  |  |
|--|--|--|--|--|--|--|--|--|---------------------------------------------------------------------------------------------------------------------------------|--|--|--|--|--|--|--|--|--|--|

%: percentage; *Aa*: *Aggregatibacter actinomycetemcomitans*; atb: antibiotic; BOP: bleeding on probing; CAL: clinical attachment level; CFU: colony forming units; CHX: chlorhexidine; d: day; F: female; *Fn*: *Fusobacterium nucleatum*; GCF: gingival crevicular fluid; GI: gingival index; m: months; M: male; mm: millimeter; NR: not reported; *Pg*: *Porphyromonas gingivalis*; *Pi*: *Prevotella intermedia*; PI: plaque index; plac: placebo; PPD: periodontal probing depth; prob: probiotic; SD: standard deviation; SRP: scaling and root planning; tetra: tetracycline fibers; *Tn*: *Tannerella forsythia*; *Td*: *Treponema denticola*; w: week.

## Appendix 9: Risk of bias within individual studies

### 9.1. Risk of bias in individual studies

#### *Abuazab 2021* (Abuazab et al., 2021) (*Mansoura Journal of Dentistry*)

| Bias                                                      | Author's Judgement   | Support for judgement                                                                                          |
|-----------------------------------------------------------|----------------------|----------------------------------------------------------------------------------------------------------------|
| Random sequence generation (selection bias)               | Unclear risk of bias | Insufficient information to permit judgement of 'Low risk' or 'High risk'.                                     |
| Allocation concealment (selection bias)                   | Unclear risk of bias | Insufficient information to permit judgement of 'Low risk' or 'High risk'.                                     |
| Blinding of participants and personnel (performance bias) | Unclear risk of bias | The study did not address this outcome                                                                         |
| Blinding of outcome assessment (detection bias)           | Unclear risk of bias | The study did not address this outcome                                                                         |
| Incomplete outcome data (attrition bias)                  | Low risk of bias     | Table 1 shows <i>n</i> , and analyzed data (coincident with <i>n</i> in the recruitment phase)                 |
| Selective reporting (reporting bias)                      | Low risk of bias     | The study protocol is not available. The findings of all parameters were evaluated and statistically analyzed. |
| Other sources of bias (other bias)                        | Low risk of bias     | The study appears to be free of other sources of bias.                                                         |

#### *Alshareef 2020* (Alshareef et al., 2020) (*European Journal of Dentistry*)

| Bias                                                      | Author's Judgement   | Support for judgement                                                                                          |
|-----------------------------------------------------------|----------------------|----------------------------------------------------------------------------------------------------------------|
| Random sequence generation (selection bias)               | Unclear risk of bias | Insufficient information to permit judgement of 'Low risk' or 'High risk'.                                     |
| Allocation concealment (selection bias)                   | Unclear risk of bias | Insufficient information to permit judgement of 'Low risk' or 'High risk'.                                     |
| Blinding of participants and personnel (performance bias) | Unclear risk of bias | The study did not address this outcome                                                                         |
| Blinding of outcome assessment (detection bias)           | Unclear risk of bias | The study did not address this outcome                                                                         |
| Incomplete outcome data (attrition bias)                  | Unclear risk of bias | Insufficient information to permit judgement of 'Low risk' or 'High risk'.                                     |
| Selective reporting (reporting bias)                      | Low risk of bias     | The study protocol is not available. The findings of all parameters were evaluated and statistically analyzed. |
| Other sources of bias (other bias)                        | Unclear risk of bias | Publication bias?                                                                                              |

#### *Butera 2020* (Butera et al., 2020) (*Microorganisms*)

| Bias                                                      | Author's Judgement | Support for judgement                                                                                                                                                                                                                        |
|-----------------------------------------------------------|--------------------|----------------------------------------------------------------------------------------------------------------------------------------------------------------------------------------------------------------------------------------------|
| Random sequence generation (selection bias)               | Low risk of bias   | By means of a block randomization table, the data analyst provided a randomization sequence, considering a permuted block of 20 participants.                                                                                                |
| Allocation concealment (selection bias)                   | Low risk of bias   | The operator who enrolled participants also assigned them to the respective domiciliary treatment using sequentially numbered and sealed envelopes with the allocation cards previously prepared; blinding him was not technically possible. |
| Blinding of participants and personnel (performance bias) | Low risk of bias   | Patients were not blinded but personnel was blinded.                                                                                                                                                                                         |
| Blinding of outcome assessment (detection bias)           | Low risk of bias   | Professional oral procedures and outcomes assessment were executed by another operator. Microbiological tests were conducted by a microbiologist in an external laboratory. Operator/data assessor, microbiologist and data analyst were     |

|                                          |                  |                                                                                                                |
|------------------------------------------|------------------|----------------------------------------------------------------------------------------------------------------|
|                                          |                  | always blinded during the study since none of them knew the treatment administered to each participant.        |
| Incomplete outcome data (attrition bias) | Low risk of bias | Data presented and analyzed are coincident with n in the recruitment phase.                                    |
| Selective reporting (reporting bias)     | Low risk of bias | The study protocol is not available. The findings of all parameters were evaluated and statistically analyzed. |
| Other sources of bias (other bias)       | Low risk of bias | The study appears to be free of other sources of bias.                                                         |

**Chandra 2016**(Chandra et al., 2016) (*Journal of the International Academy of Periodontology*)

| Bias                                                      | Author's Judgement   | Support for judgement                                                                                                                                                                                                                                                          |
|-----------------------------------------------------------|----------------------|--------------------------------------------------------------------------------------------------------------------------------------------------------------------------------------------------------------------------------------------------------------------------------|
| Random sequence generation (selection bias)               | Low risk of bias     | Randomization included computerized generation of the allocation sequence in random permuted blocks. Allocation was performed by assigning the block of sites to study and control sites according to the specified sequence.                                                  |
| Allocation concealment (selection bias)                   | Unclear risk of bias | Insufficient information to permit judgement of 'Low risk' or 'High risk'.                                                                                                                                                                                                     |
| Blinding of participants and personnel (performance bias) | Unclear risk of bias | The study did not address this outcome                                                                                                                                                                                                                                         |
| Blinding of outcome assessment (detection bias)           | Low risk of bias     | All the therapies were performed by a designated operator (TS) for the sake of uniformity, whereas the relevant readings were recorded by another operator (YSHSC) who was blinded to the nature of the site. The blind was not broken until this clinical trial was finished. |
| Incomplete outcome data (attrition bias)                  | Low risk of bias     | Figure 1 shows n, lost in follow-up, complete data, analyzed data (coincident)-reason for loss of follow up also presented                                                                                                                                                     |
| Selective reporting (reporting bias)                      | Low risk of bias     | Data coincident with was defined in the protocol (NCT02645669)                                                                                                                                                                                                                 |
| Other sources of bias (other bias)                        | Low risk of bias     | The study appears to be free of other sources of bias.                                                                                                                                                                                                                         |

**Costacurta 2018**(Costacurta et al., 2018) (*ORAL & Implantology*)

| Bias                                                      | Author's Judgement   | Support for judgement                                                                                          |
|-----------------------------------------------------------|----------------------|----------------------------------------------------------------------------------------------------------------|
| Random sequence generation (selection bias)               | Unclear risk of bias | Insufficient information to permit judgement of 'Low risk' or 'High risk'.                                     |
| Allocation concealment (selection bias)                   | Low risk of bias     | A person not involved in the clinical trial carried out the randomization                                      |
| Blinding of participants and personnel (performance bias) | Unclear risk of bias | The study did not address this outcome                                                                         |
| Blinding of outcome assessment (detection bias)           | Unclear risk of bias | The study did not address this outcome                                                                         |
| Incomplete outcome data (attrition bias)                  | Low risk of bias     | Table 1 and 2                                                                                                  |
| Selective reporting (reporting bias)                      | Low risk of bias     | The study protocol is not available. The findings of all parameters were evaluated and statistically analyzed. |
| Other sources of bias (other bias)                        | Unclear risk of bias | Publication bias?                                                                                              |

**Dhaliwal 2017**(Dhaliwal et al., 2017) (*Journal of the International Academy of Periodontology*)

| Bias                                        | Author's Judgement | Support for judgement                                                               |
|---------------------------------------------|--------------------|-------------------------------------------------------------------------------------|
| Random sequence generation (selection bias) | Low risk of bias   | Patients were randomly assigned (coin-toss method) to 2 groups of 15 patients each. |

|                                                           |                      |                                                                                                                                                                                                                                                                          |
|-----------------------------------------------------------|----------------------|--------------------------------------------------------------------------------------------------------------------------------------------------------------------------------------------------------------------------------------------------------------------------|
| Allocation concealment (selection bias)                   | Unclear risk of bias | Insufficient information to permit judgement of 'Low risk' or 'High risk'.                                                                                                                                                                                               |
| Blinding of participants and personnel (performance bias) | Unclear risk of bias | The study did not address this outcome                                                                                                                                                                                                                                   |
| Blinding of outcome assessment (detection bias)           | Unclear risk of bias | The study did not address this outcome                                                                                                                                                                                                                                   |
| Incomplete outcome data (attrition bias)                  | Low risk of bias     | Of 30 patients enrolled in the study, 27 patients (20 males and 7 females) completed the study. Two patients from the test group and one patient from the control group failed to attend the subsequent recall examinations and their data were excluded from the study. |
| Selective reporting (reporting bias)                      | Unclear risk of bias | The study protocol is not available. All the outcomes are not analyzed and discussed in the respective section for that.                                                                                                                                                 |
| Other sources of bias (other bias)                        | Low risk of bias     | The study appears to be free of other sources of bias.                                                                                                                                                                                                                   |

***El-bagoory 2021*** (El-Bagoory et al., 2021) (*J Indian Soc Periodontol*)

| <b>Bias</b>                                               | <b>Author's Judgement</b> | <b>Support for judgement</b>                                                                                                                               |
|-----------------------------------------------------------|---------------------------|------------------------------------------------------------------------------------------------------------------------------------------------------------|
| Random sequence generation (selection bias)               | Unclear risk of bias      | Investigator GH K screened the patients and randomly assigned them to test and control groups and performed the treatment procedures for all participants. |
| Allocation concealment (selection bias)                   | Unclear risk of bias      | "Investigator M.Sh recorded the clinical                                                                                                                   |
| Blinding of participants and personnel (performance bias) | Low risk of bias          | Investigator M. Sh recorded the clinical parameters, and she was masked to the randomization for the extent of the study.                                  |
| Blinding of outcome assessment (detection bias)           | Low risk of bias          | Investigator M. Sh recorded the clinical parameters, and she was masked to the randomization for the extent of the study.                                  |
| Incomplete outcome data (attrition bias)                  | Low risk of bias          | Figure 1 shows n, lost in follow-up, complete data, analyzed data (coincident)                                                                             |
| Selective reporting (reporting bias)                      | Low risk of bias          | The study protocol is not available. The findings of all parameters were evaluated and statistically analyzed.                                             |
| Other sources of bias (other bias)                        | Low risk of bias          | The study appears to be free of other sources of bias.                                                                                                     |

***Ghasemi 2020*** (Ghasemi et al., 2020) (*J Adv Periodontol Implant Dent*)

| <b>Bias</b>                                               | <b>Author's Judgement</b> | <b>Support for judgement</b>                                                                             |
|-----------------------------------------------------------|---------------------------|----------------------------------------------------------------------------------------------------------|
| Random sequence generation (selection bias)               | Low risk of bias          | Computer-generated random numbers were used to assign the patients to the test and control groups (n=18) |
| Allocation concealment (selection bias)                   | Low risk of bias          | To ensure allocation, the patients codes were preserved by a researcher based on the serial number       |
| Blinding of participants and personnel (performance bias) | Low risk of bias          | Placebo and probiotic capsules were labeled in the same containers                                       |
| Blinding of outcome assessment (detection bias)           | Unclear risk of bias      | The study did not address this outcome                                                                   |
| Incomplete outcome data (attrition bias)                  | Low risk of bias          | Table 1. First sentence of results                                                                       |
| Selective reporting (reporting bias)                      | Low risk of bias          | Data coincident with was defined in the protocol (IRCT20180630040290N2)                                  |
| Other sources of bias (other bias)                        | Low risk of bias          | The study appears to be free of other sources of bias.                                                   |



**Grover (Grover) (Thesis File)**

| Bias                                                      | Author's Judgement   | Support for judgement                                                                                                                                                                                                                                |
|-----------------------------------------------------------|----------------------|------------------------------------------------------------------------------------------------------------------------------------------------------------------------------------------------------------------------------------------------------|
| Random sequence generation (selection bias)               | Unclear risk of bias | Insufficient information to permit judgement of 'Low risk' or 'High risk'. - For this study, qualified patients were randomly categorized into 2 groups as follows:                                                                                  |
| Allocation concealment (selection bias)                   | Unclear risk of bias | Insufficient information to permit judgement of 'Low risk' or 'High risk'.                                                                                                                                                                           |
| Blinding of participants and personnel (performance bias) | Unclear risk of bias | The study did not address this outcome                                                                                                                                                                                                               |
| Blinding of outcome assessment (detection bias)           | Unclear risk of bias | The study did not address this outcome                                                                                                                                                                                                               |
| Incomplete outcome data (attrition bias)                  | Low risk of bias     | Out of 30 patients enrolled in the study 27 patients (20 males and 7 females) completed the study. Two patients from group B and one patient from group A failed to attend the subsequent recall examination whose data was excluded from the study. |
| Selective reporting (reporting bias)                      | Low risk of bias     | The findings of all parameters were evaluated and put to statistical analysis.                                                                                                                                                                       |
| Other sources of bias (other bias)                        | Low risk of bias     | The study appears to be free of other sources of bias.                                                                                                                                                                                               |

**Ikram 2019 (Ikram et al., 2019) (Annals Abbasi Shaheed Hospital & Karachi Medical & Dental College)**

| Bias                                                      | Author's Judgement   | Support for judgement                                                                                                                                                                                                                                                                                                                                                                                                                                                                                                                                                   |
|-----------------------------------------------------------|----------------------|-------------------------------------------------------------------------------------------------------------------------------------------------------------------------------------------------------------------------------------------------------------------------------------------------------------------------------------------------------------------------------------------------------------------------------------------------------------------------------------------------------------------------------------------------------------------------|
| Random sequence generation (selection bias)               | Low risk of bias     | Participants were asked by the appointed research assistant to pick one envelope containing the name of the therapy which was provided to them after the baseline periodontal examination and recording the clinical periodontal parameters.                                                                                                                                                                                                                                                                                                                            |
| Allocation concealment (selection bias)                   | Low risk of bias     | To randomization sealed opaque envelopes were used.                                                                                                                                                                                                                                                                                                                                                                                                                                                                                                                     |
| Blinding of participants and personnel (performance bias) | Low risk of bias     | Participants were asked by the appointed research assistant to pick one envelope containing the name of the therapy which was provided to them after the baseline periodontal examination and recording the clinical periodontal parameters. Throughout the study period full blinding was maintained with the help of research assistant who held all the details related to the study groups and treatment strategy till the completion of the trial and complete analysis of the research data. Both probiotic and placebo powder were similar in color and texture. |
| Blinding of outcome assessment (detection bias)           | Low risk of bias     | Throughout the study period full blinding was maintained with the help of research assistant who held all the details related to the study groups and treatment strategy till the completion of the trial and complete analysis of the research data.                                                                                                                                                                                                                                                                                                                   |
| Incomplete outcome data (attrition bias)                  | Low risk of bias     | Data presented and analyzed are coincident with n in the recruitment phase.                                                                                                                                                                                                                                                                                                                                                                                                                                                                                             |
| Selective reporting (reporting bias)                      | Unclear risk of bias | Data from the study protocol not coincident with the study. Data from Change in bacterial load of Porphyromonas gingivalis was not analyzed or presented (primary outcome) (NCT03499184).                                                                                                                                                                                                                                                                                                                                                                               |

|                                    |                  |                                                        |
|------------------------------------|------------------|--------------------------------------------------------|
| Other sources of bias (other bias) | Low risk of bias | The study appears to be free of other sources of bias. |
|------------------------------------|------------------|--------------------------------------------------------|

***Ince 2015***(Ince et al., 2015) (***J Periodontology***)

| <b>Bias</b>                                               | <b>Author's Judgement</b> | <b>Support for judgement</b>                                                                                                                                                                  |
|-----------------------------------------------------------|---------------------------|-----------------------------------------------------------------------------------------------------------------------------------------------------------------------------------------------|
| Random sequence generation (selection bias)               | Low risk of bias          | Patients who were eligible for the study were randomly assigned into 2 treatment groups according to a computer-based randomization program.                                                  |
| Allocation concealment (selection bias)                   | Unclear risk of bias      | Insufficient information to permit judgement of 'Low risk' or 'High risk'.                                                                                                                    |
| Blinding of participants and personnel (performance bias) | Low risk of bias          | Identical bottles were presented to the researcher who performed the SRP procedure (GIN) by the study leader (SY). All researchers involved in this study were blind to the treatment groups. |
| Blinding of outcome assessment (detection bias)           | Low risk of bias          | See justification above                                                                                                                                                                       |
| Incomplete outcome data (attrition bias)                  | Low risk of bias          | Figure 1 shows n, lost in follow-up, complete data, analyzed data (coincident)                                                                                                                |
| Selective reporting (reporting bias)                      | Low risk of bias          | The study protocol is not available. Presented primary outcomes are all measured and analyzed.                                                                                                |
| Other sources of bias (other bias)                        | Low risk of bias          | The study appears to be free of other sources of bias.                                                                                                                                        |

***Invernici 2018***(Invernici et al., 2018) (***J Clin Periodontol***)

| <b>Bias</b>                                               | <b>Author's Judgement</b> | <b>Support for judgement</b>                                                                                                                                                                                                                                                                 |
|-----------------------------------------------------------|---------------------------|----------------------------------------------------------------------------------------------------------------------------------------------------------------------------------------------------------------------------------------------------------------------------------------------|
| Random sequence generation (selection bias)               | Low risk of bias          | According to a random numeric table generated by computer software, the study coordinator (M.R.M.) allocated each patient to one of the following groups: Control (SRP+Placebo; 21 patients) or Test (SRP+Probiotic therapy, 20 patients).                                                   |
| Allocation concealment (selection bias)                   | Low risk of bias          | Before the study began, the selected individuals were identified by a numeric code that designated the experimental group to which they belonged. The study coordinator (M.R.M.) revealed the meaning of each code only after conducting the statistical analysis of the experimental data.  |
| Blinding of participants and personnel (performance bias) | Low risk of bias          | The coded bottles were given to the examiner (M.S.M.S.), who distributed them to the patients and did not have any access to information about the content of the lozenges. In addition, the patients were blinded to the content of the lozenges and treatment assignment during the study. |
| Blinding of outcome assessment (detection bias)           | Low risk of bias          | The study coordinator (M.R.M.) revealed the meaning of each code only after conducting the statistical analysis of the experimental data.                                                                                                                                                    |
| Incomplete outcome data (attrition bias)                  | Low risk of bias          | Figure 1 shows n, lost in follow-up, complete data, analyzed data (coincident)                                                                                                                                                                                                               |
| Selective reporting (reporting bias)                      | Low risk of bias          | There is no information about data for changes in the levels of immunoglobulin A in saliva and Changes in the expression of beta-defensin-3, toll like receptor-4, cluster of differentiation (CD)-4 and CD-8, pre-defined in protocol (NCT03408548) -                                       |

|                                    |                  |                                                        |
|------------------------------------|------------------|--------------------------------------------------------|
|                                    |                  | secondary outcome (reported on the RCT of 2020)        |
| Other sources of bias (other bias) | Low risk of bias | The study appears to be free of other sources of bias. |

***Invernici 2020***(Invernici et al., 2020) (***PLOS ONE***)

| Bias                                                      | Author's Judgement | Support for judgement                                                                                                                                                                                                                                                                                                                                                                                                                                                                                                                                                                                       |
|-----------------------------------------------------------|--------------------|-------------------------------------------------------------------------------------------------------------------------------------------------------------------------------------------------------------------------------------------------------------------------------------------------------------------------------------------------------------------------------------------------------------------------------------------------------------------------------------------------------------------------------------------------------------------------------------------------------------|
| Random sequence generation (selection bias)               | Low risk of bias   | According to a random numeric table generated by a computer software, the study coordinator (M.R.M.) allocated each patient to one of the following groups: Control (Scaling and root planing–SRP + placebo; 15 patients) or Test (SRP + probiotic therapy, 15 patients).                                                                                                                                                                                                                                                                                                                                   |
| Allocation concealment (selection bias)                   | Low risk of bias   | Before the study began, the selected individuals were identified by a numeric code that designated the experimental group to which they belonged. The study coordinator (M.R.M.) broke the code only after conducting the statistical analysis of the experimental data.                                                                                                                                                                                                                                                                                                                                    |
| Blinding of participants and personnel (performance bias) | Low risk of bias   | The same pharmacy prepared identical probiotic and placebo lozenges (i.e., same appearance, taste, and color). Identical plastic bottles containing the probiotic/placebos were sent to the study coordinator (M.R.M.), who wrote the number code of each patient on each bottle, according to the therapy to which they were assigned. The coded bottles were given to the examiner (M.S.M.S.), who was blinded to the content of the lozenges and distributed them to the patients. In addition, the patients were also blinded to the content of the lozenges and treatment assignment during the study. |
| Blinding of outcome assessment (detection bias)           | Low risk of bias   | All patients received immunological and clinical monitoring at baseline, at 30 days, and at 90 days. The evaluations (pre- and post-intervention) were conducted by a single trained and calibrated examiner (M.S.M.S.), who was blinded to the experimental groups.                                                                                                                                                                                                                                                                                                                                        |
| Incomplete outcome data (attrition bias)                  | Low risk of bias   | Figure 1 shows n, lost in follow-up, complete data, analyzed data (coincident)                                                                                                                                                                                                                                                                                                                                                                                                                                                                                                                              |
| Selective reporting (reporting bias)                      | Low risk of bias   | There is no information about data for changes PPD, levels of IL and CL, pre-defined in protocol (NCT03408548) - secondary outcome (reported on the RCT of 2018)                                                                                                                                                                                                                                                                                                                                                                                                                                            |
| Other sources of bias (other bias)                        | Low risk of bias   | The study appears to be free of other sources of bias.                                                                                                                                                                                                                                                                                                                                                                                                                                                                                                                                                      |

***Jebin 2021***(Jebin et al., 2021) (***Contemp Clin Dent.***)

| Bias                                        | Author's Judgement | Support for judgement                                                                                                                                               |
|---------------------------------------------|--------------------|---------------------------------------------------------------------------------------------------------------------------------------------------------------------|
| Random sequence generation (selection bias) | High risk of bias  | (...) following which patients were allocated randomly into both treatment groups, based on their sequence of reporting to the department by the study coordinator. |

|                                                           |                      |                                                                                                                                                                                                                                                                                                                                                                                                                                                                                                                                              |
|-----------------------------------------------------------|----------------------|----------------------------------------------------------------------------------------------------------------------------------------------------------------------------------------------------------------------------------------------------------------------------------------------------------------------------------------------------------------------------------------------------------------------------------------------------------------------------------------------------------------------------------------------|
| Allocation concealment (selection bias)                   | Unclear risk of bias | Insufficient information to permit judgement of 'Low risk' or 'High risk'.                                                                                                                                                                                                                                                                                                                                                                                                                                                                   |
| Blinding of participants and personnel (performance bias) | Unclear risk of bias | Insufficient information to permit judgement of 'Low risk' or 'High risk'. Besides classification of double-blind. Not sure about patients; The primary investigator performed SRP in all the patients using ultrasonic scaler (DTE D1 Ultrasonic scaler, Guilin woodpecker) and in deeper areas using hand instruments (Gracey curettes, Hu Friedy Mfg.) in a single session, following which patients were allocated randomly into both treatment groups, based on their sequence of reporting to the department by the study coordinator. |
| Blinding of outcome assessment (detection bias)           | Unclear risk of bias | Insufficient information to permit judgement of 'Low risk' or 'High risk'.                                                                                                                                                                                                                                                                                                                                                                                                                                                                   |
| Incomplete outcome data (attrition bias)                  | Low risk of bias     | Thirty, systemically healthy, mild-to-moderate CP patients (with age between 20 and 60 years, including 24 males and 6 females) were included in the study of which three patients were dropped out of the study due to personal reasons. Hence, the final statistical analysis was performed using 14 test group patients and 13 control group patients. The baseline clinical parameters and the Pg levels for the patients were comparable for both treatment groups ( $P > 0.05$ ).                                                      |
| Selective reporting (reporting bias)                      | Low risk of bias     | The study protocol is not available. The findings of all parameters were evaluated and statistically analyzed.                                                                                                                                                                                                                                                                                                                                                                                                                               |
| Other sources of bias (other bias)                        | Low risk of bias     | The study appears to be free of other sources of bias.                                                                                                                                                                                                                                                                                                                                                                                                                                                                                       |

**Kanagaraj 2019**(Kanagaraj et al., 2019) (*International Journal of Oral Health Dentistry*)

| Bias                                                      | Author's Judgement   | Support for judgement                                                                                                                  |
|-----------------------------------------------------------|----------------------|----------------------------------------------------------------------------------------------------------------------------------------|
| Random sequence generation (selection bias)               | Low risk of bias     | (...) 60 participants assigned to test and control group using lottery method.                                                         |
| Allocation concealment (selection bias)                   | Unclear risk of bias | Insufficient information to permit judgement of 'Low risk' or 'High risk'.                                                             |
| Blinding of participants and personnel (performance bias) | Unclear risk of bias | The study did not address this outcome (only said single blind, but it isn't clear in the text)                                        |
| Blinding of outcome assessment (detection bias)           | Unclear risk of bias | The study did not address this outcome                                                                                                 |
| Incomplete outcome data (attrition bias)                  | Unclear risk of bias | Insufficient reporting of attrition/exclusions to permit judgement of 'Low risk' or 'High risk' (no reasons for missing data provided) |
| Selective reporting (reporting bias)                      | Low risk of bias     | The study protocol is not available. The findings of all parameters were evaluated and statistically analyzed.                         |
| Other sources of bias (other bias)                        | Low risk of bias     | The study appears to be free of other sources of bias.                                                                                 |

**Kumar 2021**(Kumar et al., 2021) (*Journal of Periodontal & Implant Science*)

| Bias                                        | Author's Judgement | Support for judgement                                                                                                                                                                                                                              |
|---------------------------------------------|--------------------|----------------------------------------------------------------------------------------------------------------------------------------------------------------------------------------------------------------------------------------------------|
| Random sequence generation (selection bias) | Low risk of bias   | Random assignment was performed by the study coordinator (RS) in ascending order at the enrollment visit. A biostatistician provided codes through a computer-generated randomization table for 1 of the 3 treatment protocols. A balanced random- |

|                                                           |                  |                                                                                                                                                                                                                                                                                                                                                                                                                                                                                                                                                                                |
|-----------------------------------------------------------|------------------|--------------------------------------------------------------------------------------------------------------------------------------------------------------------------------------------------------------------------------------------------------------------------------------------------------------------------------------------------------------------------------------------------------------------------------------------------------------------------------------------------------------------------------------------------------------------------------|
|                                                           |                  | permuted block approach (9-unit block size) was used to prepare the randomization table.                                                                                                                                                                                                                                                                                                                                                                                                                                                                                       |
| Allocation concealment (selection bias)                   | Low risk of bias | The study coordinator (RS) allocated randomization codes to patients and was kept completely masked from any other details of the study. At treatment visits, an investigator (VJ) unaware of the code that had been assigned to a particular subject was provided with the sequential probiotic/placebo-containing tube by RS to be locally applied in subjects.                                                                                                                                                                                                              |
| Blinding of participants and personnel (performance bias) | Low risk of bias | Three identical, sterile, dry Eppendorf tubes numbered 1, 2, and 3 (representing the treatment sequence) were prepared to contain color- and texture-matched placebo or probiotic powder in equal volumes. A biochemical technician who was blinded to the study protocol prepared these tubes. The tubes were placed in coded, sealed, non-labeled envelopes following randomization charts and codes. The non-labeled coded envelopes were dispensed to the study coordinator (RS). Disclosure of the assigned groups was done after completion of the statistical analysis. |
| Blinding of outcome assessment (detection bias)           | Low risk of bias | See justification above                                                                                                                                                                                                                                                                                                                                                                                                                                                                                                                                                        |
| Incomplete outcome data (attrition bias)                  | Low risk of bias | The study flow chart is depicted in Figure 1. Forty-five of the 48 subjects were evaluated for clinical parameters and biochemical analysis. The dropouts did not affect the power of the study, as we recruited beyond the minimum sample size to counter study attrition. Demographic characteristics were analyzed after study completion, and the groups were found to be matched for non-modifiable characteristics at baseline ( $P>0.05$ ) (Table 1).                                                                                                                   |
| Selective reporting (reporting bias)                      | Low risk of bias | The study protocol is not available. All the outcomes are not analyzed and discussed in the respective section for that.                                                                                                                                                                                                                                                                                                                                                                                                                                                       |
| Other sources of bias (other bias)                        | Low risk of bias | The study appears to be free of other sources of bias.                                                                                                                                                                                                                                                                                                                                                                                                                                                                                                                         |

**Laleman 2015**(Laleman et al., 2015) (*J Clin Periodontol*)

| <b>Bias</b>                                               | <b>Author's Judgement</b> | <b>Support for judgement</b>                                                                                              |
|-----------------------------------------------------------|---------------------------|---------------------------------------------------------------------------------------------------------------------------|
| Random sequence generation (selection bias)               | Low risk of bias          | Randomization of the patients was done by block randomization (version 2.7.3; StatsDirect).                               |
| Allocation concealment (selection bias)                   | Unclear risk of bias      | Except for the study coordinator, all patients and study personnel were blinded to the study group allocation.            |
| Blinding of participants and personnel (performance bias) | Low risk of bias          | See justification above and - The probiotic and placebo tablets were identical in shape, texture, taste, and composition. |
| Blinding of outcome assessment (detection bias)           | Unclear risk of bias      | Insufficient information to permit judgement of 'Low risk' or 'High risk'.                                                |
| Incomplete outcome data (attrition bias)                  | Low risk of bias          | Table 1                                                                                                                   |

|                                      |                  |                                                                |
|--------------------------------------|------------------|----------------------------------------------------------------|
| Selective reporting (reporting bias) | Low risk of bias | Data coincident with was defined in the protocol (NCT02403960) |
| Other sources of bias (other bias)   | Low risk of bias | The study appears to be free of other sources of bias.         |

**Meenakshi 2020**(Meenakshi & Varghese, 2018) (*Drug Invention Today*)

| Bias                                                      | Author's Judgement   | Support for judgement                                                                                                 |
|-----------------------------------------------------------|----------------------|-----------------------------------------------------------------------------------------------------------------------|
| Random sequence generation (selection bias)               | Low risk of bias     | Patients who were eligible for participation were randomly assigned by the flip of a coin into one of the two groups. |
| Allocation concealment (selection bias)                   | Unclear risk of bias | Insufficient information to permit judgement of 'Low risk' or 'High risk'.                                            |
| Blinding of participants and personnel (performance bias) | Unclear risk of bias | The study did not address this outcome                                                                                |
| Blinding of outcome assessment (detection bias)           | Unclear risk of bias | The study did not address this outcome                                                                                |
| Incomplete outcome data (attrition bias)                  | Unclear risk of bias | Insufficient information to permit judgement of 'Low risk' or 'High risk'.                                            |
| Selective reporting (reporting bias)                      | Unclear risk of bias | Insufficient information to permit judgement of 'Low risk' or 'High risk'.                                            |
| Other sources of bias (other bias)                        | Unclear risk of bias | Insufficient information to assess whether an important risk of bias exists                                           |

**Minić 2020**(Minic et al., 2022) (*Int J Dent Hygiene*)

| Bias                                                      | Author's Judgement   | Support for judgement                                                                                          |
|-----------------------------------------------------------|----------------------|----------------------------------------------------------------------------------------------------------------|
| Random sequence generation (selection bias)               | Unclear risk of bias | Insufficient information to permit judgement of 'Low risk' or 'High risk'.                                     |
| Allocation concealment (selection bias)                   | Unclear risk of bias | Insufficient information to permit judgement of 'Low risk' or 'High risk'.                                     |
| Blinding of participants and personnel (performance bias) | Unclear risk of bias | The study did not address this outcome                                                                         |
| Blinding of outcome assessment (detection bias)           | Unclear risk of bias | The study did not address this outcome                                                                         |
| Incomplete outcome data (attrition bias)                  | Low risk of bias     | Table 1 and table 2                                                                                            |
| Selective reporting (reporting bias)                      | Low risk of bias     | The study protocol is not available. The findings of all parameters were evaluated and statistically analyzed. |
| Other sources of bias (other bias)                        | Unclear risk of bias | Due to study methodology                                                                                       |

**Morales 2016**(Morales et al., 2016) (*Journal of Periodontology*)

| Bias                                                      | Author's Judgement | Support for judgement                                                                                                                                                                                                                                                                                                                                                                                               |
|-----------------------------------------------------------|--------------------|---------------------------------------------------------------------------------------------------------------------------------------------------------------------------------------------------------------------------------------------------------------------------------------------------------------------------------------------------------------------------------------------------------------------|
| Random sequence generation (selection bias)               | Low risk of bias   | Participants with chronic periodontitis were randomized by the study coordinator over the two treatment groups: control [C] (SRP + placebo) or test [T] (SRP + probiotic). Randomization was computer-generated. Eligible individuals were allocated randomly to the test and control groups according to gender, age, and smoking status after the basal examination, using a randomization table (Jorge Gamonal). |
| Allocation concealment (selection bias)                   | Low risk of bias   | Randomization was computer-generated, with allocation concealment by opaque sequentially numbered sealed envelopes. Study coordinator was responsible for allocation concealment.                                                                                                                                                                                                                                   |
| Blinding of participants and personnel (performance bias) | Low risk of bias   | Except for the study coordinator (Jorge Gamonal), all study personnel and patients were blinded to the study group assignment. Only after study completion,                                                                                                                                                                                                                                                         |

|                                                 |                  |                                                                                                                                                                                                                   |
|-------------------------------------------------|------------------|-------------------------------------------------------------------------------------------------------------------------------------------------------------------------------------------------------------------|
|                                                 |                  | the designation of the different groups was revealed.                                                                                                                                                             |
| Blinding of outcome assessment (detection bias) | Low risk of bias | Except for the study coordinator (Jorge Gamonal), all study personnel and patients were blinded to the study group assignment. Only after study completion, the designation of the different groups was revealed. |
| Incomplete outcome data (attrition bias)        | Low risk of bias | Figure 1 shows n, lost in follow-up, complete data, analyzed data (coincident)                                                                                                                                    |
| Selective reporting (reporting bias)            | Low risk of bias | There is no information about data for levels of Interleukin and levels of periodontal pathogens changes, pre-defined in protocol (NCT02283736) - secondary outcome                                               |
| Other sources of bias (other bias)              | Low risk of bias | The study appears to be free of other sources of bias.                                                                                                                                                            |

***Oliveira 2021*** (Oliveira et al., 2021) (*J Periodontol*)

| Bias                                                      | Author's Judgement   | Support for judgement                                                                                                                                                                                     |
|-----------------------------------------------------------|----------------------|-----------------------------------------------------------------------------------------------------------------------------------------------------------------------------------------------------------|
| Random sequence generation (selection bias)               | Low risk of bias     | Eligible individuals were randomly allocated into the SI+probiotic or SI+placebo group per a computer-generated list using sequentially numbered sealed envelopes by an independent researcher (L.C.P.E). |
| Allocation concealment (selection bias)                   | Low risk of bias     | Eligible individuals were randomly allocated into the SI+probiotic or SI+placebo group per a computer-generated list using sequentially numbered sealed envelopes by an independent researcher (L.C.P.E). |
| Blinding of participants and personnel (performance bias) | Low risk of bias     | Participants and professional (A.M.O.) were blind to group assignment. Identical probiotics * and placebo † capsules were prepacked in the same opaque vials, containing 30 capsules each.                |
| Blinding of outcome assessment (detection bias)           | Low risk of bias     | The codes of the groups were revealed only after completion of all clinical and laboratory proceedings.                                                                                                   |
| Incomplete outcome data (attrition bias)                  | Low risk of bias     | 2 months after allocation, 6 individuals on placebo and 5 in probiotic were excluded due to antibiotic use                                                                                                |
| Selective reporting (reporting bias)                      | Unclear risk of bias | The study protocol is not available. Presented primary outcomes are all measured and analyzed, but not mention on the discussion phase.                                                                   |
| Other sources of bias (other bias)                        | Low risk of bias     | The study appears to be free of other sources of bias.                                                                                                                                                    |

***Oliveira 2022*** (de Oliveira et al., 2022) (*J Periodontol.*)

| Bias                                        | Author's Judgement | Support for judgement                                                                                                                                                                                  |
|---------------------------------------------|--------------------|--------------------------------------------------------------------------------------------------------------------------------------------------------------------------------------------------------|
| Random sequence generation (selection bias) | Low risk of bias   | Eligible individuals were randomly allocated into the SI+probiotic or SI+placebo group per a computer-generated list using sequentially numbered sealed envelopes by an independent researcher (LCPE). |
| Allocation concealment (selection bias)     | Low risk of bias   | (...) using sequentially numbered sealed envelopes by an independent researcher (LCPE). The codes of the groups were                                                                                   |

|                                                           |                  |                                                                                                                                                                                                                         |
|-----------------------------------------------------------|------------------|-------------------------------------------------------------------------------------------------------------------------------------------------------------------------------------------------------------------------|
|                                                           |                  | revealed only after completion of all clinical and laboratory proceedings. Participants and professional (AMO) were blind to group assignment.                                                                          |
| Blinding of participants and personnel (performance bias) | Low risk of bias | Identical probiotics and placebo capsules were prepacked in the same opaque vials, containing 30 capsules each. The codes of the groups were revealed only after completion of all clinical and laboratory proceedings. |
| Blinding of outcome assessment (detection bias)           | Low risk of bias | Participants and professional (AMO) were blind to group assignment. AMO performed the statistical analysis                                                                                                              |
| Incomplete outcome data (attrition bias)                  | Low risk of bias | After the initial contact and clinical screening, 48 periodontitis individuals were eligible, six were excluded during the therapeutic phase due to antibiotic use, and 42 completed the study                          |
| Selective reporting (reporting bias)                      | Low risk of bias | The study protocol is not available. The findings of all parameters were evaluated and statistically analyzed.                                                                                                          |
| Other sources of bias (other bias)                        | Low risk of bias | The study appears to be free of other sources of bias.                                                                                                                                                                  |

***Ozener 2022*** (Ozener et al., 2023) (*J Clin Oral Investig*)

| Bias                                                      | Author's Judgement | Support for judgement                                                                                                                                                                                                 |
|-----------------------------------------------------------|--------------------|-----------------------------------------------------------------------------------------------------------------------------------------------------------------------------------------------------------------------|
| Random sequence generation (selection bias)               | Low risk of bias   | Thirty participants were randomly assigned in two treatment groups by a computer-assisted randomization program. Each patient was assigned a number (1–30) and a code.                                                |
| Allocation concealment (selection bias)                   | Low risk of bias   | The coordinator of the study (BEK) distributed the coded yogurt container to the patients at baseline. Prior to statistical analysis, the coordinator cracked the code to allocate the patients to the proper groups. |
| Blinding of participants and personnel (performance bias) | Low risk of bias   | The study personnel and participants were unaware of the study group assignment, except for the study coordinator.                                                                                                    |
| Blinding of outcome assessment (detection bias)           | Low risk of bias   | Prior to statistical analysis, the coordinator cracked the code to allocate the patients to the proper groups.                                                                                                        |
| Incomplete outcome data (attrition bias)                  | Low risk of bias   | Table 1                                                                                                                                                                                                               |
| Selective reporting (reporting bias)                      | Low risk of bias   | The findings of all parameters were evaluated and statistically analyzed.                                                                                                                                             |
| Other sources of bias (other bias)                        | Low risk of bias   | The study appears to be free of other sources of bias.                                                                                                                                                                |

***Paul 2019*** (Paul et al., 2019) (*Journal of Health and Research*)

| Bias                                        | Author's Judgement | Support for judgement                                                                                                                                                                                          |
|---------------------------------------------|--------------------|----------------------------------------------------------------------------------------------------------------------------------------------------------------------------------------------------------------|
| Random sequence generation (selection bias) | Low risk of bias   | The random numbers were generated by computerized random number, in permuted blocks of 6. The randomization list and numbered packing of the intervention were prepared by a person not involved in the study. |
| Allocation concealment (selection bias)     | Low risk of bias   | All the randomization numbers were concealed in separate envelopes and                                                                                                                                         |



|                                                           |                      |                                                                                                                                                                           |
|-----------------------------------------------------------|----------------------|---------------------------------------------------------------------------------------------------------------------------------------------------------------------------|
|                                                           |                      | marked by patient number on the outer envelope. The individually sealed envelope method was used to maintain blinding of the investigators and study participants.        |
| Blinding of participants and personnel (performance bias) | Low risk of bias     | The individually sealed envelope method was used to maintain blinding of the investigators and study participants.                                                        |
| Blinding of outcome assessment (detection bias)           | Low risk of bias     | See justification above                                                                                                                                                   |
| Incomplete outcome data (attrition bias)                  | Unclear risk of bias | Insufficient reporting of attrition/exclusions to permit judgement of 'Low risk' or 'High risk' (e.g. number randomized not stated, no reasons for missing data provided) |
| Selective reporting (reporting bias)                      | Low risk of bias     | The study protocol is not available. The findings of all parameters were evaluated and statistically analyzed.                                                            |
| Other sources of bias (other bias)                        | Unclear risk of bias | Publication bias - they don't specify the number of sample size needed to have power on statistical analysis.                                                             |

***Pelekos 2020***(Pelekos et al., 2020) (***Journal of Clinical Periodontology***)

| <b>Bias</b>                                               | <b>Author's Judgement</b> | <b>Support for judgement</b>                                                                                                                  |
|-----------------------------------------------------------|---------------------------|-----------------------------------------------------------------------------------------------------------------------------------------------|
| Random sequence generation (selection bias)               | Low risk of bias          | Insufficient information to permit judgement of 'Low risk' or 'High risk', but we presume that the methodology was equal to Pelekos G., 2019. |
| Allocation concealment (selection bias)                   | Low risk of bias          | Insufficient information to permit judgement of 'Low risk' or 'High risk'.                                                                    |
| Blinding of participants and personnel (performance bias) | Low risk of bias          | The study did not address this outcome (only said single blind, but it isn't clear in the text), although is classified as double blind       |
| Blinding of outcome assessment (detection bias)           | Low risk of bias          | The study did not address this outcome                                                                                                        |
| Incomplete outcome data (attrition bias)                  | High risk of bias         | Recruitment involved 59 participants, and then data is analyzed only in 40 patients.                                                          |
| Selective reporting (reporting bias)                      | Low risk of bias          | The study protocol is not available. The findings of secondary outcome 'visible plaque' are not presented.                                    |
| Other sources of bias (other bias)                        | Low risk of bias          | The study appears to be free of other sources of bias.                                                                                        |

***Penala 2016***(Penala et al., 2016) (***Journal of Research in Pharmacy Practice***)

| <b>Bias</b>                                               | <b>Author's Judgement</b> | <b>Support for judgement</b>                                                                                                                                                                                                                             |
|-----------------------------------------------------------|---------------------------|----------------------------------------------------------------------------------------------------------------------------------------------------------------------------------------------------------------------------------------------------------|
| Random sequence generation (selection bias)               | Low risk of bias          | Randomization was done based on computer generated random numbers by a biostatistician to allocate patients to one of the treatment groups.                                                                                                              |
| Allocation concealment (selection bias)                   | Low risk of bias          | To ensure allocation concealment, the codes for the patients based on the serial number were maintained by one of the investigators. The same investigator dispensed the probiotic and placebo capsules to the investigator doing all the interventions. |
| Blinding of participants and personnel (performance bias) | Low risk of bias          | Probiotic and placebo capsules were provided in identically labeled containers and were given code as A and B.                                                                                                                                           |

|                                                 |                      |                                                                                                                                                                                                                                                                       |
|-------------------------------------------------|----------------------|-----------------------------------------------------------------------------------------------------------------------------------------------------------------------------------------------------------------------------------------------------------------------|
| Blinding of outcome assessment (detection bias) | Low risk of bias     | The same investigator dispensed the probiotic and placebo capsules to the investigator doing all the interventions.                                                                                                                                                   |
| Incomplete outcome data (attrition bias)        | Low risk of bias     | Three patients were lost to follow-up, one in the test group and the rest in the control group as one of the patients did not turn up for further appointments due to time constraints, and others migrated to some other place as mentioned in the study flow chart. |
| Selective reporting (reporting bias)            | Low risk of bias     | The study protocol is not available. Presented primary outcomes are all measured and analyzed.                                                                                                                                                                        |
| Other sources of bias (other bias)              | Unclear risk of bias | Publication bias??                                                                                                                                                                                                                                                    |

***Pudgar 2020***(Pudgar et al., 2021) (***Clinical Oral Investigations***)

| <b>Bias</b>                                               | <b>Author's Judgement</b> | <b>Support for judgement</b>                                                                                                                                                                                                                                                                                                                                                                                                 |
|-----------------------------------------------------------|---------------------------|------------------------------------------------------------------------------------------------------------------------------------------------------------------------------------------------------------------------------------------------------------------------------------------------------------------------------------------------------------------------------------------------------------------------------|
| Random sequence generation (selection bias)               | Low risk of bias          | Whether a subject received test medication or placebo was determined using a computer generated randomization table provided by the company and disclosed to the examiner and operator upon the last follow-up visit of the last patient. Simple randomization procedure based on a single sequence of random assignments was utilized.                                                                                      |
| Allocation concealment (selection bias)                   | Low risk of bias          | Allocation concealment was insured by CMS Dental, Copenhagen, Denmark. The company marked the boxes containing probiotic/placebo vials and lozenges with sequential numbers and insured that all were identical in appearance. The allocation of subjects into treatment groups was revealed to the therapist (P. P.) and evaluator (R. G.) by uncovering a randomization code after the last patient had been re-evaluated. |
| Blinding of participants and personnel (performance bias) | Low risk of bias          | The company marked the boxes containing probiotic/placebo vials and lozenges with sequential numbers and insured that all were identical in appearance.                                                                                                                                                                                                                                                                      |
| Blinding of outcome assessment (detection bias)           | Low risk of bias          | See justification above                                                                                                                                                                                                                                                                                                                                                                                                      |
| Incomplete outcome data (attrition bias)                  | Low risk of bias          | Figure 1 and table 1                                                                                                                                                                                                                                                                                                                                                                                                         |
| Selective reporting (reporting bias)                      | Low risk of bias          | Data coincident with was defined in the protocol (NCT04137419)                                                                                                                                                                                                                                                                                                                                                               |
| Other sources of bias (other bias)                        | Low risk of bias          | The study appears to be free of other sources of bias.                                                                                                                                                                                                                                                                                                                                                                       |

***Ranjith 2021***(Ranjith et al., 2022) (***Int J Dent Hygiene***)

| <b>Bias</b>                                               | <b>Author's Judgement</b> | <b>Support for judgement</b>                                                                                                                                                               |
|-----------------------------------------------------------|---------------------------|--------------------------------------------------------------------------------------------------------------------------------------------------------------------------------------------|
| Random sequence generation (selection bias)               | Low risk of bias          | Selected subjects were randomly allotted into test group and control group (1:1 ratio) using block randomization method.                                                                   |
| Allocation concealment (selection bias)                   | Low risk of bias          | Allocations were prepared by the statistician, which were kept in sealed opaque envelopes, which was opened at the time of procedure by the clinical assistant who distributed the sachet. |
| Blinding of participants and personnel (performance bias) | Low risk of bias          | Triple blind                                                                                                                                                                               |

|                                                 |                      |                                                                                                                                                                                                                               |
|-------------------------------------------------|----------------------|-------------------------------------------------------------------------------------------------------------------------------------------------------------------------------------------------------------------------------|
| Blinding of outcome assessment (detection bias) | Unclear risk of bias | Although they say it is a triple blind RCT, the allocation was prepared by the statistician.                                                                                                                                  |
| Incomplete outcome data (attrition bias)        | Low risk of bias     | 2 patients from test group and 1 patient from control group were excluded from the study due to the use of anti-inflammatory drugs during the study period. 2 patients in control group could not be contacted for follow up. |
| Selective reporting (reporting bias)            | Low risk of bias     | Data reported according pre-established protocol (CTRI/2019/10/021630)                                                                                                                                                        |
| Other sources of bias (other bias)              | Low risk of bias     |                                                                                                                                                                                                                               |

**Tekce 2015**(Tekce et al., 2015) (*J Clin Periodontol*)

| Bias                                                      | Author's Judgement   | Support for judgement                                                                                                                                                                                                                                                                                                                                                                                                                   |
|-----------------------------------------------------------|----------------------|-----------------------------------------------------------------------------------------------------------------------------------------------------------------------------------------------------------------------------------------------------------------------------------------------------------------------------------------------------------------------------------------------------------------------------------------|
| Random sequence generation (selection bias)               | Low risk of bias     | Patients who were eligible for study participation were randomly assigned to one of the two treatment groups according to a computer-based randomization program (www.randomizer.org/Copyright ©1997–2011 by Geoffrey C. Urbaniak and Scott Plous).                                                                                                                                                                                     |
| Allocation concealment (selection bias)                   | High risk of bias    | Probably not done                                                                                                                                                                                                                                                                                                                                                                                                                       |
| Blinding of participants and personnel (performance bias) | Low risk of bias     | The study leader (SY)presented identical bottles to the researcher, who performed the SRP procedure (GIN).                                                                                                                                                                                                                                                                                                                              |
| Blinding of outcome assessment (detection bias)           | Low risk of bias     | The study leader (SY)presented identical bottles to the researcher, who performed the SRP procedure (GIN).                                                                                                                                                                                                                                                                                                                              |
| Incomplete outcome data (attrition bias)                  | Low risk of bias     | The remaining 40 systemically healthy patients with chronic periodontitis included 18 males and 22 females between 35 and 50 years of age. The baseline clinical and microbiological parameters for these patients were similar for both groups ( $p > 0.05$ ) (Table 1). No adverse effects were observed throughout the study period. All subjects completed the 360-day study period and were compliant with the study requirements. |
| Selective reporting (reporting bias)                      | Unclear risk of bias | The study protocol is not available. Presented primary outcomes are all measured but not analyzed and discussed in the respective section for that.                                                                                                                                                                                                                                                                                     |
| Other sources of bias (other bias)                        | Low risk of bias     | The study appears to be free of other sources of bias.                                                                                                                                                                                                                                                                                                                                                                                  |

**Teughels 2013**(Teughels et al., 2013) (*J Clin Periodontol*)

| Bias                                        | Author's Judgement | Support for judgement                                                                                                                                                                                                          |
|---------------------------------------------|--------------------|--------------------------------------------------------------------------------------------------------------------------------------------------------------------------------------------------------------------------------|
| Random sequence generation (selection bias) | Low risk of bias   | Randomization of the 30 patients, fulfilling the inclusion/exclusion criteria and willing to participate in this study, over the two different treatment groups was done by block randomization (version 2.7.3; Stats-Direct). |
| Allocation concealment (selection bias)     | Low risk of bias   | Insufficient information to permit judgement of 'Low risk' or 'High risk' - "Coded bottles were given by the study coordinator (MCH) to the                                                                                    |

|                                                           |                  |                                                                                                                                                                                                                                            |
|-----------------------------------------------------------|------------------|--------------------------------------------------------------------------------------------------------------------------------------------------------------------------------------------------------------------------------------------|
|                                                           |                  | examiner (OO) at the patient's first initial treatment, 3, 6 and 9 week visit."                                                                                                                                                            |
| Blinding of participants and personnel (performance bias) | Low risk of bias | Except for the study coordinator, all study personnel and patients were blinded to the study group assignment.                                                                                                                             |
| Blinding of outcome assessment (detection bias)           | Low risk of bias | Prior to sending the data to the biostatistician, the code was partially broken by MCH to group the different patients over the two treatments. Only after the statistical analysis, the designation of the different groups was revealed. |
| Incomplete outcome data (attrition bias)                  | Low risk of bias | Figure 1 shows n, lost in follow-up, complete data, analyzed data (coincident)                                                                                                                                                             |
| Selective reporting (reporting bias)                      | Low risk of bias | The study protocol is not available. Presented primary outcomes are all measured and analyzed.                                                                                                                                             |
| Other sources of bias (other bias)                        | Low risk of bias | The study appears to be free of other sources of bias.                                                                                                                                                                                     |

***Theodoro 2019*** (Theodoro et al., 2019) (***Beneficial Microbes***)

| <b>Bias</b>                                               | <b>Author's Judgement</b> | <b>Support for judgement</b>                                                                                                                                                                                                                                                                                                                                                                                                                                                                                                                                                                                         |
|-----------------------------------------------------------|---------------------------|----------------------------------------------------------------------------------------------------------------------------------------------------------------------------------------------------------------------------------------------------------------------------------------------------------------------------------------------------------------------------------------------------------------------------------------------------------------------------------------------------------------------------------------------------------------------------------------------------------------------|
| Random sequence generation (selection bias)               | Low risk of bias          | After inclusion in the present study, patients underwent the randomization process, in which patients were randomly divided into two groups using an online randomization system ( <a href="http://www.sealedenvelope.com">www.sealedenvelope.com</a> ).                                                                                                                                                                                                                                                                                                                                                             |
| Allocation concealment (selection bias)                   | Unclear risk of bias      | After randomization, envelopes were created regarding the treatment of each patient by a professional who did not perform the evaluation of the patients nor the treatments (LHT), which were opened only after treatment. They do not specify if the envelopes are époque and correctly sealed.                                                                                                                                                                                                                                                                                                                     |
| Blinding of participants and personnel (performance bias) | Low risk of bias          | All probiotic tablets were removed from their packaging and placed in vials identified with the same pattern as the placebo group. Although the vials containing probiotics and placebos were identical, they had different descriptions on the packaging label, for the professional to differentiate them. <sup>[1]</sup> The SRP procedures were performed under anesthesia using the regional block technique by two specialists (MAAN, DMJM), different from the professional who performed the clinical examinations and who were unaware of the results of the randomization until the scaling was completed. |
| Blinding of outcome assessment (detection bias)           | Low risk of bias          | See justification above                                                                                                                                                                                                                                                                                                                                                                                                                                                                                                                                                                                              |
| Incomplete outcome data (attrition bias)                  | Low risk of bias          | Figure 1 shows n, lost in follow-up, complete data, analyzed data (missing data were considered and the groups are balanced)                                                                                                                                                                                                                                                                                                                                                                                                                                                                                         |
| Selective reporting (reporting bias)                      | Low risk of bias          | The study protocol is not available. Presented primary outcomes are all measured and analyzed.                                                                                                                                                                                                                                                                                                                                                                                                                                                                                                                       |

|                                    |                  |                                                        |
|------------------------------------|------------------|--------------------------------------------------------|
| Other sources of bias (other bias) | Low risk of bias | The study appears to be free of other sources of bias. |
|------------------------------------|------------------|--------------------------------------------------------|

**Tsubura 2009**(Tsubura et al., 2009) (*Eur J Clin Microbiol Infect Dis*)

| Bias                                                      | Author's Judgement   | Support for judgement                                                                                                    |
|-----------------------------------------------------------|----------------------|--------------------------------------------------------------------------------------------------------------------------|
| Random sequence generation (selection bias)               | Unclear risk of bias | Insufficient information to permit judgement of 'Low risk' or 'High risk'.                                               |
| Allocation concealment (selection bias)                   | Unclear risk of bias | Insufficient information to permit judgement of 'Low risk' or 'High risk'.                                               |
| Blinding of participants and personnel (performance bias) | Unclear risk of bias | The study did not address this outcome                                                                                   |
| Blinding of outcome assessment (detection bias)           | Unclear risk of bias | The study did not address this outcome                                                                                   |
| Incomplete outcome data (attrition bias)                  | Low risk of bias     | Fifty-four participants were examined according to the protocol and all of them completed the study.                     |
| Selective reporting (reporting bias)                      | Unclear risk of bias | The study protocol is not available. All the outcomes are not analyzed and discussed in the respective section for that. |
| Other sources of bias (other bias)                        | Unclear risk of bias | Due to study methodology and publication bias?                                                                           |

**Vicario 2013**(Vicario et al., 2013) (*Acta Odontologica Scandinavica*,)

| Bias                                                      | Author's Judgement    | Support for judgement                                                                                                                                                                                                                                                                                                                |
|-----------------------------------------------------------|-----------------------|--------------------------------------------------------------------------------------------------------------------------------------------------------------------------------------------------------------------------------------------------------------------------------------------------------------------------------------|
| Random sequence generation (selection bias)               | Low risk of bias      | Subjects were assigned in ascending order at the enrolment visit and were randomly assigned by a computer-generated table to receive one of the two treatments. A balanced random permuted block approach (5-unit block size) was used to prepare randomization tables in order to avoid unequal balance between the two treatments. |
| Allocation concealment (selection bias)                   | Low risk of bias      | The randomization code was not open until all data had been collected and analyzed.                                                                                                                                                                                                                                                  |
| Blinding of participants and personnel (performance bias) | Low risk of bias      | The randomization table was sent to the manufacturer (GUM, Sunstar) in Switzerland, which prepared the tablets containing Lactobacillus reuteri Prodentis and the placebo tablets with the same appearance color and shape.                                                                                                          |
| Blinding of outcome assessment (detection bias)           | Low risk of bias      | The randomization code was not open until all data had been collected and analyzed.                                                                                                                                                                                                                                                  |
| Incomplete outcome data (attrition bias)                  | Low risk of bias      | Table 1 and 20 patients participated in the study. One patient from the placebo group was withdrawn because she had to take antibiotics during the study period.                                                                                                                                                                     |
| Selective reporting (reporting bias)                      | Low risk of bias      | The study protocol is not available. Presented primary outcomes are all measured and analyzed.                                                                                                                                                                                                                                       |
| Other sources of bias (other bias)                        | Unclear risk of bias* | Publication bias?? - they don't refer how to calculate the sample size                                                                                                                                                                                                                                                               |

## 9.2. Overall appraisal of included studies

| <b>Author_year</b>   | <b>“Low risk of bias”<br/>answer (%)</b> | <b>Final classification</b> |
|----------------------|------------------------------------------|-----------------------------|
| Abuazab_2021         | 42.86                                    | High                        |
| Alshareef_2020       | 14.29                                    | High                        |
| Butera_2020          | 100                                      | Low                         |
| Chandra_2016         | 71.43                                    | Low                         |
| Costacurta_2018      | 42.86                                    | High                        |
| Dhaliwal_2017        | 42.86                                    | High                        |
| El-bagoory_2021      | 71.43                                    | Low                         |
| Ghasemi_2020         | 85.71                                    | Low                         |
| Grover [thesis file] | 42.86                                    | High                        |
| Ikram_2019           | 85.71                                    | Low                         |
| Ince_2015            | 85.71                                    | Low                         |
| Invernici_2018       | 100                                      | Low                         |
| Invernici_2020       | 100                                      | Low                         |
| Jebin_2021           | 42.86                                    | High                        |
| Kanagaraj_2019       | 42.86                                    | High                        |
| Kumar_2021           | 100                                      | Low                         |
| Laleman_2015         | 71.43                                    | Low                         |
| Meenakshi_2020       | 14.29                                    | High                        |
| Minić_2020           | 28.57                                    | High                        |
| Morales_2016         | 100                                      | Low                         |
| Oliveira_2021        | 85.71                                    | Low                         |
| Oliveira_2022        | 100                                      | Low                         |
| Ozener_2023          | 100                                      | Low                         |
| Paul_2019            | 71.43                                    | Low                         |
| Pelekos_2020         | 85.71                                    | Low                         |
| Penala_2016          | 85.71                                    | Low                         |
| Pudgar_2021          | 100                                      | Low                         |
| Ranjith_2021         | 85.71                                    | Low                         |
| Tekce_2015           | 71.43                                    | Low                         |
| Teughels_2013        | 100                                      | Low                         |
| Theodoro_2019        | 85.71                                    | Low                         |
| Tsubura_2009         | 14.29                                    | High                        |
| Vicario_2013         | 85.71                                    | Low                         |

# Appendix 10: SIDE analysis

PPD (short-term studies)

Separate indirect from direct evidence (SIDE) using back-calculation method

Random effects model:

| comparison                                 | k | prop | nma     | direct  | indir. | Diff | z | p-value |
|--------------------------------------------|---|------|---------|---------|--------|------|---|---------|
| LspoSfaeCbutBmes:Sbbif                     | 0 | 0    | 0.9800  | 0.9800  |        |      |   |         |
| LspoSfaeCbutBmes:SBlaLacidBbifLrham        | 0 | 0    | 0.3200  | 0.3200  |        |      |   |         |
| LspoSfaeCbutBmes:SBlaLactDN                | 0 | 0    | 0.6900  | 0.6900  |        |      |   |         |
| LspoSfaeCbutBmes:SBlaLactis                | 0 | 0    | 0.6000  | 0.6000  |        |      |   |         |
| LspoSfaeCbutBmes:SChx                      | 0 | 0    | 1.1600  | 1.1600  |        |      |   |         |
| LspoSfaeCbutBmes:SfaeCbutBmesLspo          | 0 | 0    | 0.7900  | 0.7900  |        |      |   |         |
| LspoSfaeCbutBmes:SLacidLcasBbifLrhamLsal   | 0 | 0    | 0.8090  | 0.8090  |        |      |   |         |
| LspoSfaeCbutBmes:SLacidLrhaBlongSboul      | 0 | 0    | 0.3800  | 0.3800  |        |      |   |         |
| LspoSfaeCbutBmes:SLbrevis                  | 0 | 0    | 0.9660  | 0.9660  |        |      |   |         |
| LspoSfaeCbutBmes:SLbrevisplant             | 0 | 0    | 0.8700  | 0.8700  |        |      |   |         |
| LspoSfaeCbutBmes:SLcas                     | 0 | 0    | 0.0700  | 0.0700  |        |      |   |         |
| LspoSfaeCbutBmes:SLreut                    | 0 | 0    | -0.6100 | -0.6100 |        |      |   |         |
| LspoSfaeCbutBmes:SLreutD                   | 0 | 0    | 0.7700  | 0.7700  |        |      |   |         |
| LspoSfaeCbutBmes:SLreutDA                  | 0 | 0    | 0.8400  | 0.8400  |        |      |   |         |
| LspoSfaeCbutBmes:SLreutU                   | 0 | 0    | 3.4100  | 3.4100  |        |      |   |         |
| LspoSfaeCbutBmes:SLsppBsp                  | 0 | 0    | 0.8100  | 0.8100  |        |      |   |         |
| LspoSfaeCbutBmes:SpLac                     | 1 | 1.00 | 0.8700  | 0.8700  |        |      |   |         |
| LspoSfaeCbutBmes:SRP                       | 0 | 0    | 0.8900  | 0.8900  |        |      |   |         |
| LspoSfaeCbutBmes:SRPLacidBinFEfae          | 0 | 0    | 0.1700  | 0.1700  |        |      |   |         |
| Sbbif:SBlaLacidBbifLrham                   | 0 | 0    | -0.6600 | -0.6600 |        |      |   |         |
| Sbbif:SBlaLactDN                           | 0 | 0    | -0.2900 | -0.2900 |        |      |   |         |
| Sbbif:SBlaLactis                           | 0 | 0    | -0.3800 | -0.3800 |        |      |   |         |
| Sbbif:SChx                                 | 1 | 1.00 | 0.1800  | 0.1800  |        |      |   |         |
| Sbbif:SfaeCbutBmesLspo                     | 0 | 0    | -0.1900 | -0.1900 |        |      |   |         |
| Sbbif:SLacidLcasBbifLrhamLsal              | 0 | 0    | -0.1710 | -0.1710 |        |      |   |         |
| Sbbif:SLacidLrhaBlongSboul                 | 0 | 0    | -0.6000 | -0.6000 |        |      |   |         |
| Sbbif:SLbrevis                             | 0 | 0    | -0.0140 | -0.0140 |        |      |   |         |
| Sbbif:SLbrevisplant                        | 0 | 0    | -0.1100 | -0.1100 |        |      |   |         |
| Sbbif:SLcas                                | 0 | 0    | -0.9100 | -0.9100 |        |      |   |         |
| Sbbif:SLreut                               | 0 | 0    | -1.5900 | -1.5900 |        |      |   |         |
| Sbbif:SLreutD                              | 0 | 0    | -0.2100 | -0.2100 |        |      |   |         |
| Sbbif:SLreutDA                             | 0 | 0    | -0.1400 | -0.1400 |        |      |   |         |
| Sbbif:SLreutU                              | 0 | 0    | 2.4300  | 2.4300  |        |      |   |         |
| Sbbif:SLsppBsp                             | 0 | 0    | -0.1700 | -0.1700 |        |      |   |         |
| Sbbif:SpLac                                | 0 | 0    | -0.1100 | -0.1100 |        |      |   |         |
| Sbbif:SRP                                  | 1 | 1.00 | -0.0900 | -0.0900 |        |      |   |         |
| Sbbif:SRPLacidBinFEfae                     | 0 | 0    | -0.8100 | -0.8100 |        |      |   |         |
| SBlaLacidBbifLrham:SBlaLactDN              | 0 | 0    | 0.3700  | 0.3700  |        |      |   |         |
| SBlaLacidBbifLrham:SBlaLactis              | 0 | 0    | 0.2800  | 0.2800  |        |      |   |         |
| SBlaLacidBbifLrham:SChx                    | 0 | 0    | 0.8400  | 0.8400  |        |      |   |         |
| SBlaLacidBbifLrham:SfaeCbutBmesLspo        | 0 | 0    | 0.4700  | 0.4700  |        |      |   |         |
| SBlaLacidBbifLrham:SLacidLcasBbifLrhamLsal | 0 | 0    | 0.4890  | 0.4890  |        |      |   |         |
| SBlaLacidBbifLrham:SLacidLrhaBlongSboul    | 0 | 0    | 0.0600  | 0.0600  |        |      |   |         |
| SBlaLacidBbifLrham:SLbrevis                | 0 | 0    | 0.6460  | 0.6460  |        |      |   |         |
| SBlaLacidBbifLrham:SLbrevisplant           | 0 | 0    | 0.5500  | 0.5500  |        |      |   |         |
| SBlaLacidBbifLrham:SLcas                   | 0 | 0    | -0.2500 | -0.2500 |        |      |   |         |
| SBlaLacidBbifLrham:SLreut                  | 0 | 0    | -0.9300 | -0.9300 |        |      |   |         |
| SBlaLacidBbifLrham:SLreutD                 | 0 | 0    | 0.4500  | 0.4500  |        |      |   |         |
| SBlaLacidBbifLrham:SLreutDA                | 0 | 0    | 0.5200  | 0.5200  |        |      |   |         |
| SBlaLacidBbifLrham:SLreutU                 | 0 | 0    | 3.0900  | 3.0900  |        |      |   |         |
| SBlaLacidBbifLrham:SLsppBsp                | 0 | 0    | 0.4900  | 0.4900  |        |      |   |         |
| SBlaLacidBbifLrham:SpLac                   | 1 | 1.00 | 0.5500  | 0.5500  |        |      |   |         |
| SBlaLacidBbifLrham:SRP                     | 0 | 0    | 0.5700  | 0.5700  |        |      |   |         |
| SBlaLacidBbifLrham:SRPLacidBinFEfae        | 0 | 0    | -0.1500 | -0.1500 |        |      |   |         |
| SBlaLactDN:SBlaLactis                      | 0 | 0    | -0.0900 | -0.0900 |        |      |   |         |
| SBlaLactDN:SChx                            | 0 | 0    | 0.4700  | 0.4700  |        |      |   |         |
| SBlaLactDN:SfaeCbutBmesLspo                | 0 | 0    | 0.1000  | 0.1000  |        |      |   |         |
| SBlaLactDN:SLacidLcasBbifLrhamLsal         | 0 | 0    | 0.1190  | 0.1190  |        |      |   |         |
| SBlaLactDN:SLacidLrhaBlongSboul            | 0 | 0    | -0.3100 | -0.3100 |        |      |   |         |
| SBlaLactDN:SLbrevis                        | 0 | 0    | 0.2760  | 0.2760  |        |      |   |         |
| SBlaLactDN:SLbrevisplant                   | 0 | 0    | 0.1800  | 0.1800  |        |      |   |         |
| SBlaLactDN:SLcas                           | 0 | 0    | -0.6200 | -0.6200 |        |      |   |         |
| SBlaLactDN:SLreut                          | 0 | 0    | -1.3000 | -1.3000 |        |      |   |         |
| SBlaLactDN:SLreutD                         | 0 | 0    | 0.0800  | 0.0800  |        |      |   |         |
| SBlaLactDN:SLreutDA                        | 0 | 0    | 0.1500  | 0.1500  |        |      |   |         |
| SBlaLactDN:SLreutU                         | 0 | 0    | 2.7200  | 2.7200  |        |      |   |         |
| SBlaLactDN:SLsppBsp                        | 0 | 0    | 0.1200  | 0.1200  |        |      |   |         |
| SBlaLactDN:SpLac                           | 1 | 1.00 | 0.1800  | 0.1800  |        |      |   |         |
| SBlaLactDN:SRP                             | 0 | 0    | 0.2000  | 0.2000  |        |      |   |         |
| SBlaLactDN:SRPLacidBinFEfae                | 0 | 0    | -0.5200 | -0.5200 |        |      |   |         |
| SBlaLactis:SChx                            | 0 | 0    | 0.5600  | 0.5600  |        |      |   |         |
| SBlaLactis:SfaeCbutBmesLspo                | 0 | 0    | 0.1900  | 0.1900  |        |      |   |         |
| SBlaLactis:SLacidLcasBbifLrhamLsal         | 0 | 0    | 0.2090  | 0.2090  |        |      |   |         |
| SBlaLactis:SLacidLrhaBlongSboul            | 0 | 0    | -0.2200 | -0.2200 |        |      |   |         |
| SBlaLactis:SLbrevis                        | 0 | 0    | 0.3660  | 0.3660  |        |      |   |         |
| SBlaLactis:SLbrevisplant                   | 0 | 0    | 0.2700  | 0.2700  |        |      |   |         |
| SBlaLactis:SLcas                           | 0 | 0    | -0.5300 | -0.5300 |        |      |   |         |
| SBlaLactis:SLreut                          | 0 | 0    | -1.2100 | -1.2100 |        |      |   |         |
| SBlaLactis:SLreutD                         | 0 | 0    | 0.1700  | 0.1700  |        |      |   |         |
| SBlaLactis:SLreutDA                        | 0 | 0    | 0.2400  | 0.2400  |        |      |   |         |
| SBlaLactis:SLreutU                         | 0 | 0    | 2.8100  | 2.8100  |        |      |   |         |
| SBlaLactis:SLsppBsp                        | 0 | 0    | 0.2100  | 0.2100  |        |      |   |         |
| SBlaLactis:SpLac                           | 1 | 1.00 | 0.2700  | 0.2700  |        |      |   |         |
| SBlaLactis:SRP                             | 0 | 0    | 0.2900  | 0.2900  |        |      |   |         |
| SBlaLactis:SRPLacidBinFEfae                | 0 | 0    | -0.4300 | -0.4300 |        |      |   |         |
| SChx:SfaeCbutBmesLspo                      | 0 | 0    | -0.3700 | -0.3700 |        |      |   |         |
| SChx:SLacidLcasBbifLrhamLsal               | 0 | 0    | -0.3510 | -0.3510 |        |      |   |         |
| SChx:SLacidLrhaBlongSboul                  | 0 | 0    | -0.7800 | -0.7800 |        |      |   |         |

|  |                                              |   |      |         |         |  |  |  |  |
|--|----------------------------------------------|---|------|---------|---------|--|--|--|--|
|  | SChx:SLbrevis                                | 0 | 0    | -0.1940 | -0.1940 |  |  |  |  |
|  | SChx:SLbreviselant                           | 0 | 0    | -0.2900 | -0.2900 |  |  |  |  |
|  | SChx:SLcas                                   | 0 | 0    | -1.0900 | -1.0900 |  |  |  |  |
|  | SChx:SLreut                                  | 0 | 0    | -1.7700 | -1.7700 |  |  |  |  |
|  | SChx:SLreutD                                 | 0 | 0    | -0.3900 | -0.3900 |  |  |  |  |
|  | SChx:SLreutDA                                | 0 | 0    | -0.3200 | -0.3200 |  |  |  |  |
|  | SChx:SLreutU                                 | 0 | 0    | 2.2500  | 2.2500  |  |  |  |  |
|  | SChx:SLsppBsp                                | 0 | 0    | -0.3500 | -0.3500 |  |  |  |  |
|  | SChx:SpIac                                   | 0 | 0    | -0.2900 | -0.2900 |  |  |  |  |
|  | SChx:SRP                                     | 1 | 1.00 | -0.2700 | -0.2700 |  |  |  |  |
|  | SChx:SRPLacidBinEfae                         | 0 | 0    | -0.9900 | -0.9900 |  |  |  |  |
|  | SfaeCbutBmesLspo:SLacidLcasBbiFLrhamLsal     | 0 | 0    | 0.0190  | 0.0190  |  |  |  |  |
|  | SfaeCbutBmesLspo:SLacidLrhaBlongSboul        | 0 | 0    | -0.4100 | -0.4100 |  |  |  |  |
|  | SfaeCbutBmesLspo:SLbrevis                    | 0 | 0    | 0.1760  | 0.1760  |  |  |  |  |
|  | SfaeCbutBmesLspo:SLbreviselant               | 0 | 0    | 0.0800  | 0.0800  |  |  |  |  |
|  | SfaeCbutBmesLspo:SLcas                       | 0 | 0    | -0.7200 | -0.7200 |  |  |  |  |
|  | SfaeCbutBmesLspo:SLreut                      | 0 | 0    | -1.4000 | -1.4000 |  |  |  |  |
|  | SfaeCbutBmesLspo:SLreutD                     | 0 | 0    | -0.0200 | -0.0200 |  |  |  |  |
|  | SfaeCbutBmesLspo:SLreutDA                    | 0 | 0    | 0.0500  | 0.0500  |  |  |  |  |
|  | SfaeCbutBmesLspo:SLreutU                     | 0 | 0    | 2.6200  | 2.6200  |  |  |  |  |
|  | SfaeCbutBmesLspo:SLsppBsp                    | 0 | 0    | 0.0200  | 0.0200  |  |  |  |  |
|  | SfaeCbutBmesLspo:SpIac                       | 0 | 0    | 0.0800  | 0.0800  |  |  |  |  |
|  | SfaeCbutBmesLspo:SRP                         | 2 | 1.00 | 0.1000  | 0.1000  |  |  |  |  |
|  | SfaeCbutBmesLspo:SRPLacidBinEfae             | 0 | 0    | -0.6200 | -0.6200 |  |  |  |  |
|  | SLacidLcasBbiFLrhamLsal:SLacidLrhaBlongSboul | 0 | 0    | -0.4290 | -0.4290 |  |  |  |  |
|  | SLacidLcasBbiFLrhamLsal:SLbrevis             | 0 | 0    | 0.1570  | 0.1570  |  |  |  |  |
|  | SLacidLcasBbiFLrhamLsal:SLbreviselant        | 0 | 0    | 0.0610  | 0.0610  |  |  |  |  |
|  | SLacidLcasBbiFLrhamLsal:SLcas                | 0 | 0    | -0.7390 | -0.7390 |  |  |  |  |
|  | SLacidLcasBbiFLrhamLsal:SLreut               | 0 | 0    | -1.4190 | -1.4190 |  |  |  |  |
|  | SLacidLcasBbiFLrhamLsal:SLreutD              | 0 | 0    | -0.0390 | -0.0390 |  |  |  |  |
|  | SLacidLcasBbiFLrhamLsal:SLreutDA             | 0 | 0    | 0.0310  | 0.0310  |  |  |  |  |
|  | SLacidLcasBbiFLrhamLsal:SLreutU              | 0 | 0    | 2.6010  | 2.6010  |  |  |  |  |
|  | SLacidLcasBbiFLrhamLsal:SLsppBsp             | 0 | 0    | 0.0010  | 0.0010  |  |  |  |  |
|  | SLacidLcasBbiFLrhamLsal:SpIac                | 0 | 0    | 0.0610  | 0.0610  |  |  |  |  |
|  | SLacidLcasBbiFLrhamLsal:SRP                  | 1 | 1.00 | 0.0810  | 0.0810  |  |  |  |  |
|  | SLacidLcasBbiFLrhamLsal:SRPLacidBinEfae      | 0 | 0    | -0.6390 | -0.6390 |  |  |  |  |
|  | SLacidLrhaBlongSboul:SLbrevis                | 0 | 0    | 0.5860  | 0.5860  |  |  |  |  |
|  | SLacidLrhaBlongSboul:SLbreviselant           | 0 | 0    | 0.4900  | 0.4900  |  |  |  |  |
|  | SLacidLrhaBlongSboul:SLcas                   | 0 | 0    | -0.3100 | -0.3100 |  |  |  |  |
|  | SLacidLrhaBlongSboul:SLreut                  | 0 | 0    | -0.9900 | -0.9900 |  |  |  |  |
|  | SLacidLrhaBlongSboul:SLreutD                 | 0 | 0    | 0.3900  | 0.3900  |  |  |  |  |
|  | SLacidLrhaBlongSboul:SLreutDA                | 0 | 0    | 0.4600  | 0.4600  |  |  |  |  |
|  | SLacidLrhaBlongSboul:SLreutU                 | 0 | 0    | 3.0300  | 3.0300  |  |  |  |  |
|  | SLacidLrhaBlongSboul:SLsppBsp                | 0 | 0    | 0.4300  | 0.4300  |  |  |  |  |
|  | SLacidLrhaBlongSboul:SpIac                   | 1 | 1.00 | 0.4900  | 0.4900  |  |  |  |  |
|  | SLacidLrhaBlongSboul:SRP                     | 0 | 0    | 0.5100  | 0.5100  |  |  |  |  |
|  | SLacidLrhaBlongSboul:SRPLacidBinEfae         | 0 | 0    | -0.2100 | -0.2100 |  |  |  |  |
|  | SLbrevis:SLbreviselant                       | 0 | 0    | -0.0960 | -0.0960 |  |  |  |  |
|  | SLbrevis:SLcas                               | 0 | 0    | -0.8960 | -0.8960 |  |  |  |  |
|  | SLbrevis:SLreut                              | 0 | 0    | -1.5760 | -1.5760 |  |  |  |  |
|  | SLbrevis:SLreutD                             | 0 | 0    | -0.1960 | -0.1960 |  |  |  |  |
|  | SLbrevis:SLreutDA                            | 0 | 0    | -0.1260 | -0.1260 |  |  |  |  |
|  | SLbrevis:SLreutU                             | 0 | 0    | 2.4440  | 2.4440  |  |  |  |  |
|  | SLbrevis:SLsppBsp                            | 0 | 0    | -0.1560 | -0.1560 |  |  |  |  |
|  | SLbrevis:SpIac                               | 1 | 1.00 | -0.0960 | -0.0960 |  |  |  |  |
|  | SLbrevis:SRP                                 | 0 | 0    | -0.0760 | -0.0760 |  |  |  |  |
|  | SLbrevis:SRPLacidBinEfae                     | 0 | 0    | -0.7960 | -0.7960 |  |  |  |  |
|  | SLbreviselant:SLcas                          | 0 | 0    | -0.8000 | -0.8000 |  |  |  |  |
|  | SLbreviselant:SLreut                         | 0 | 0    | -1.4800 | -1.4800 |  |  |  |  |
|  | SLbreviselant:SLreutD                        | 0 | 0    | -0.1000 | -0.1000 |  |  |  |  |
|  | SLbreviselant:SLreutDA                       | 0 | 0    | -0.0300 | -0.0300 |  |  |  |  |
|  | SLbreviselant:SLreutU                        | 0 | 0    | 2.5400  | 2.5400  |  |  |  |  |
|  | SLbreviselant:SLsppBsp                       | 0 | 0    | -0.0600 | -0.0600 |  |  |  |  |
|  | SLbreviselant:SpIac                          | 1 | 1.00 | -0.0000 | 0.0000  |  |  |  |  |
|  | SLbreviselant:SRP                            | 0 | 0    | 0.0200  | 0.0200  |  |  |  |  |
|  | SLbreviselant:SRPLacidBinEfae                | 0 | 0    | -0.7000 | -0.7000 |  |  |  |  |
|  | SLcas:SLreut                                 | 0 | 0    | -0.6800 | -0.6800 |  |  |  |  |
|  | SLcas:SLreutD                                | 0 | 0    | 0.7000  | 0.7000  |  |  |  |  |
|  | SLcas:SLreutDA                               | 0 | 0    | 0.7700  | 0.7700  |  |  |  |  |
|  | SLcas:SLreutU                                | 0 | 0    | 3.3400  | 3.3400  |  |  |  |  |
|  | SLcas:SLsppBsp                               | 0 | 0    | 0.7400  | 0.7400  |  |  |  |  |
|  | SLcas:SpIac                                  | 0 | 0    | 0.8000  | 0.8000  |  |  |  |  |
|  | SLcas:SRP                                    | 1 | 1.00 | 0.8200  | 0.8200  |  |  |  |  |
|  | SLcas:SRPLacidBinEfae                        | 0 | 0    | 0.1000  | 0.1000  |  |  |  |  |
|  | SLreut:SLreutD                               | 0 | 0    | 1.3800  | 1.3800  |  |  |  |  |
|  | SLreut:SLreutDA                              | 0 | 0    | 1.4500  | 1.4500  |  |  |  |  |
|  | SLreut:SLreutU                               | 0 | 0    | 4.0200  | 4.0200  |  |  |  |  |
|  | SLreut:SLsppBsp                              | 0 | 0    | 1.4200  | 1.4200  |  |  |  |  |
|  | SLreut:SpIac                                 | 1 | 1.00 | 1.4800  | 1.4800  |  |  |  |  |
|  | SLreut:SRP                                   | 0 | 0    | 1.5000  | 1.5000  |  |  |  |  |
|  | SLreut:SRPLacidBinEfae                       | 0 | 0    | 0.7800  | 0.7800  |  |  |  |  |
|  | SLreutD:SLreutDA                             | 0 | 0    | 0.0700  | 0.0700  |  |  |  |  |
|  | SLreutD:SLreutU                              | 0 | 0    | 2.6400  | 2.6400  |  |  |  |  |
|  | SLreutD:SLsppBsp                             | 0 | 0    | 0.0400  | 0.0400  |  |  |  |  |
|  | SLreutD:SpIac                                | 1 | 1.00 | 0.1000  | 0.1000  |  |  |  |  |
|  | SLreutD:SRP                                  | 0 | 0    | 0.1200  | 0.1200  |  |  |  |  |
|  | SLreutD:SRPLacidBinEfae                      | 0 | 0    | -0.6000 | -0.6000 |  |  |  |  |
|  | SLreutDA:SLreutU                             | 0 | 0    | 2.5700  | 2.5700  |  |  |  |  |
|  | SLreutDA:SLsppBsp                            | 0 | 0    | -0.0300 | -0.0300 |  |  |  |  |
|  | SLreutDA:SpIac                               | 1 | 1.00 | 0.0300  | 0.0300  |  |  |  |  |
|  | SLreutDA:SRP                                 | 1 | 1.00 | 0.0500  | 0.0500  |  |  |  |  |
|  | SLreutDA:SRPLacidBinEfae                     | 0 | 0    | -0.6700 | -0.6700 |  |  |  |  |
|  | SLreutU:SLsppBsp                             | 0 | 0    | -2.6000 | -2.6000 |  |  |  |  |
|  | SLreutU:SpIac                                | 0 | 0    | -2.5400 | -2.5400 |  |  |  |  |
|  | SLreutU:SRP                                  | 1 | 1.00 | -2.5200 | -2.5200 |  |  |  |  |
|  | SLreutU:SRPLacidBinEfae                      | 0 | 0    | -3.2400 | -3.2400 |  |  |  |  |
|  | SLsppBsp:SpIac                               | 2 | 1.00 | 0.0600  | 0.0600  |  |  |  |  |
|  | SLsppBsp:SRP                                 | 0 | 0    | 0.0800  | 0.0800  |  |  |  |  |
|  | SLsppBsp:SRPLacidBinEfae                     | 0 | 0    | -0.6400 | -0.6400 |  |  |  |  |
|  | SRP:SpIac                                    | 0 | 0    | -0.0200 | -0.0200 |  |  |  |  |
|  | SRPLacidBinEfae:SpIac                        | 0 | 0    | 0.7000  | 0.7000  |  |  |  |  |
|  | SRP:SRPLacidBinEfae                          | 1 | 1.00 | -0.7200 | -0.7200 |  |  |  |  |

Legend:

- comparison - Treatment comparison
- k - Number of studies providing direct evidence
- prop - Direct evidence proportion
- rma - Estimated treatment effect (MD) in network meta-analysis
- direct - Estimated treatment effect (MD) derived from direct evidence
- indir. - Estimated treatment effect (MD) derived from indirect evidence
- Diff - Difference between direct and indirect treatment estimates
- z - z-value of test for disagreement (direct versus indirect)
- p-value - p-value of test for disagreement (direct versus indirect)



## PPD (long-term studies)

### Separate indirect from direct evidence (SIDE) using back-calculation method

Random effects model:

| comparison                 | k | prop | nma     | direct  | indir.  | Diff | z | p-value |
|----------------------------|---|------|---------|---------|---------|------|---|---------|
| SLreutDA:SLreutinrem       | 0 | 0    | 0.7159  | .       | 0.7159  | .    | . | .       |
| SLreutDA:SLreutsingle      | 0 | 0    | 0.5759  | .       | 0.5759  | .    | . | .       |
| SLreutDA:SLrham            | 0 | 0    | 0.6959  | .       | 0.6959  | .    | . | .       |
| SLreutDA:Splac             | 3 | 1.00 | 0.7959  | 0.7959  | .       | .    | . | .       |
| SLreutDA:SSoraluberrat     | 0 | 0    | 0.8959  | .       | 0.8959  | .    | . | .       |
| SLreutinrem:SLreutsingle   | 1 | 1.00 | -0.1400 | -0.1400 | .       | .    | . | .       |
| SLreutinrem:SLrham         | 0 | 0    | -0.0200 | .       | -0.0200 | .    | . | .       |
| SLreutinrem:Splac          | 1 | 1.00 | 0.0800  | 0.0800  | .       | .    | . | .       |
| SLreutinrem:SSoraluberrat  | 0 | 0    | 0.1800  | .       | 0.1800  | .    | . | .       |
| SLreutsingle:SLrham        | 0 | 0    | 0.1200  | .       | 0.1200  | .    | . | .       |
| SLreutsingle:Splac         | 1 | 1.00 | 0.2200  | 0.2200  | .       | .    | . | .       |
| SLreutsingle:SSoraluberrat | 0 | 0    | 0.3200  | .       | 0.3200  | .    | . | .       |
| SLrham:Splac               | 1 | 1.00 | 0.1000  | 0.1000  | .       | .    | . | .       |
| SLrham:SSoraluberrat       | 0 | 0    | 0.2000  | .       | 0.2000  | .    | . | .       |
| SSoraluberrat:Splac        | 1 | 1.00 | -0.1000 | -0.1000 | .       | .    | . | .       |

Legend:

- comparison - Treatment comparison
- k - Number of studies providing direct evidence
- prop - Direct evidence proportion
- nma - Estimated treatment effect (MD) in network meta-analysis
- direct - Estimated treatment effect (MD) derived from direct evidence
- indir. - Estimated treatment effect (MD) derived from indirect evidence
- Diff - Difference between direct and indirect treatment estimates
- z - z-value of test for disagreement (direct versus indirect)
- p-value - p-value of test for disagreement (direct versus indirect)

5

## CAL (short-term studies)

Separate indirect from direct evidence (SIDE) using back-calculation method

Random effects model:

| comparison                                  | k | prop | rma     | direct | indir.  | Diff | z | p-value |
|---------------------------------------------|---|------|---------|--------|---------|------|---|---------|
| LspoSfaeCbutBmes:Sbbif                      | 0 | 0    | 0.0700  |        | 0.0700  |      |   |         |
| LspoSfaeCbutBmes:SBlaclacidBbiflrham        | 0 | 0    | 0.3100  |        | 0.3100  |      |   |         |
| LspoSfaeCbutBmes:SBlaclactDN                | 0 | 0    | 0.5700  |        | 0.5700  |      |   |         |
| LspoSfaeCbutBmes:SBlaclactis                | 0 | 0    | 0.4200  |        | 0.4200  |      |   |         |
| LspoSfaeCbutBmes:Schx                       | 0 | 0    | 0.3800  |        | 0.3800  |      |   |         |
| LspoSfaeCbutBmes:SfaeCbutBmesLspo           | 0 | 0    | 0.1300  |        | 0.1300  |      |   |         |
| LspoSfaeCbutBmes:SLacidLcasBbiflrhamLsal    | 0 | 0    | 0.3790  |        | 0.3790  |      |   |         |
| LspoSfaeCbutBmes:SLacidLrhaBlongSboul       | 0 | 0    | -0.3200 |        | -0.3200 |      |   |         |
| LspoSfaeCbutBmes:SLbrevis                   | 0 | 0    | 1.0910  |        | 1.0910  |      |   |         |
| LspoSfaeCbutBmes:SLbrevisplant              | 0 | 0    | 0.8300  |        | 0.8300  |      |   |         |
| LspoSfaeCbutBmes:SLcas                      | 0 | 0    | -0.1300 |        | -0.1300 |      |   |         |
| LspoSfaeCbutBmes:SLreut                     | 0 | 0    | 0.1500  |        | 0.1500  |      |   |         |
| LspoSfaeCbutBmes:SLreutD                    | 0 | 0    | 0.3600  |        | 0.3600  |      |   |         |
| LspoSfaeCbutBmes:SLreutDA                   | 0 | 0    | 0.4900  |        | 0.4900  |      |   |         |
| LspoSfaeCbutBmes:SLreutU                    | 0 | 0    | 0.1100  |        | 0.1100  |      |   |         |
| LspoSfaeCbutBmes:SLsppBsp                   | 0 | 0    | 0.4500  |        | 0.4500  |      |   |         |
| LspoSfaeCbutBmes:SpLac                      | 1 | 1.00 | 0.7300  | 0.7300 |         |      |   |         |
| LspoSfaeCbutBmes:SRP                        | 0 | 0    | 0.4600  |        | 0.4600  |      |   |         |
| Sbbif:SBlaclacidBbiflrham                   | 0 | 0    | 0.2400  |        | 0.2400  |      |   |         |
| Sbbif:SBlaclactDN                           | 0 | 0    | 0.5000  |        | 0.5000  |      |   |         |
| Sbbif:SBlaclactis                           | 0 | 0    | 0.3500  |        | 0.3500  |      |   |         |
| Sbbif:Schx                                  | 1 | 1.00 | 0.3100  | 0.3100 |         |      |   |         |
| Sbbif:SfaeCbutBmesLspo                      | 0 | 0    | 0.0600  |        | 0.0600  |      |   |         |
| Sbbif:SLacidLcasBbiflrhamLsal               | 0 | 0    | 0.3090  |        | 0.3090  |      |   |         |
| Sbbif:SLacidLrhaBlongSboul                  | 0 | 0    | -0.3900 |        | -0.3900 |      |   |         |
| Sbbif:SLbrevis                              | 0 | 0    | 1.0210  |        | 1.0210  |      |   |         |
| Sbbif:SLbrevisplant                         | 0 | 0    | 0.7600  |        | 0.7600  |      |   |         |
| Sbbif:SLcas                                 | 0 | 0    | -0.2000 |        | -0.2000 |      |   |         |
| Sbbif:SLreut                                | 0 | 0    | 0.0800  |        | 0.0800  |      |   |         |
| Sbbif:SLreutD                               | 0 | 0    | 0.2900  |        | 0.2900  |      |   |         |
| Sbbif:SLreutDA                              | 0 | 0    | 0.4200  |        | 0.4200  |      |   |         |
| Sbbif:SLreutU                               | 0 | 0    | 0.0400  |        | 0.0400  |      |   |         |
| Sbbif:SLsppBsp                              | 0 | 0    | 0.3800  |        | 0.3800  |      |   |         |
| Sbbif:SpLac                                 | 0 | 0    | 0.6600  |        | 0.6600  |      |   |         |
| Sbbif:SRP                                   | 1 | 1.00 | 0.3900  | 0.3900 |         |      |   |         |
| SBlaclacidBbiflrham:SBlaclactDN             | 0 | 0    | 0.2600  |        | 0.2600  |      |   |         |
| SBlaclacidBbiflrham:SBlaclactis             | 0 | 0    | 0.1100  |        | 0.1100  |      |   |         |
| SBlaclacidBbiflrham:Schx                    | 0 | 0    | 0.0700  |        | 0.0700  |      |   |         |
| SBlaclacidBbiflrham:SfaeCbutBmesLspo        | 0 | 0    | -0.1800 |        | -0.1800 |      |   |         |
| SBlaclacidBbiflrham:SLacidLcasBbiflrhamLsal | 0 | 0    | 0.0690  |        | 0.0690  |      |   |         |
| SBlaclacidBbiflrham:SLacidLrhaBlongSboul    | 0 | 0    | -0.6300 |        | -0.6300 |      |   |         |
| SBlaclacidBbiflrham:SLbrevis                | 0 | 0    | 0.7810  |        | 0.7810  |      |   |         |
| SBlaclacidBbiflrham:SLbrevisplant           | 0 | 0    | 0.5200  |        | 0.5200  |      |   |         |
| SBlaclacidBbiflrham:SLcas                   | 0 | 0    | -0.4400 |        | -0.4400 |      |   |         |
| SBlaclacidBbiflrham:SLreut                  | 0 | 0    | -0.1600 |        | -0.1600 |      |   |         |
| SBlaclacidBbiflrham:SLreutD                 | 0 | 0    | 0.0500  |        | 0.0500  |      |   |         |
| SBlaclacidBbiflrham:SLreutDA                | 0 | 0    | 0.1800  |        | 0.1800  |      |   |         |
| SBlaclacidBbiflrham:SLreutU                 | 0 | 0    | -0.2000 |        | -0.2000 |      |   |         |
| SBlaclacidBbiflrham:SLsppBsp                | 0 | 0    | 0.1400  |        | 0.1400  |      |   |         |
| SBlaclacidBbiflrham:SpLac                   | 1 | 1.00 | 0.4200  | 0.4200 |         |      |   |         |
| SBlaclacidBbiflrham:SRP                     | 0 | 0    | 0.1500  |        | 0.1500  |      |   |         |
| SBlaclactDN:SBlaclactis                     | 0 | 0    | -0.1500 |        | -0.1500 |      |   |         |
| SBlaclactDN:Schx                            | 0 | 0    | -0.1900 |        | -0.1900 |      |   |         |
| SBlaclactDN:SfaeCbutBmesLspo                | 0 | 0    | -0.4400 |        | -0.4400 |      |   |         |
| SBlaclactDN:SLacidLcasBbiflrhamLsal         | 0 | 0    | -0.1910 |        | -0.1910 |      |   |         |
| SBlaclactDN:SLacidLrhaBlongSboul            | 0 | 0    | -0.8900 |        | -0.8900 |      |   |         |
| SBlaclactDN:SLbrevis                        | 0 | 0    | 0.5210  |        | 0.5210  |      |   |         |
| SBlaclactDN:SLbrevisplant                   | 0 | 0    | 0.2600  |        | 0.2600  |      |   |         |
| SBlaclactDN:SLcas                           | 0 | 0    | -0.7000 |        | -0.7000 |      |   |         |
| SBlaclactDN:SLreut                          | 0 | 0    | -0.4200 |        | -0.4200 |      |   |         |
| SBlaclactDN:SLreutD                         | 0 | 0    | -0.2100 |        | -0.2100 |      |   |         |
| SBlaclactDN:SLreutDA                        | 0 | 0    | -0.0800 |        | -0.0800 |      |   |         |
| SBlaclactDN:SLreutU                         | 0 | 0    | -0.4600 |        | -0.4600 |      |   |         |
| SBlaclactDN:SLsppBsp                        | 0 | 0    | -0.1200 |        | -0.1200 |      |   |         |
| SBlaclactDN:SpLac                           | 1 | 1.00 | 0.1600  | 0.1600 |         |      |   |         |
| SBlaclactDN:SRP                             | 0 | 0    | -0.1100 |        | -0.1100 |      |   |         |
| SBlaclactis:Schx                            | 0 | 0    | -0.0400 |        | -0.0400 |      |   |         |
| SBlaclactis:SfaeCbutBmesLspo                | 0 | 0    | -0.2900 |        | -0.2900 |      |   |         |
| SBlaclactis:SLacidLcasBbiflrhamLsal         | 0 | 0    | -0.0410 |        | -0.0410 |      |   |         |
| SBlaclactis:SLacidLrhaBlongSboul            | 0 | 0    | -0.7400 |        | -0.7400 |      |   |         |
| SBlaclactis:SLbrevis                        | 0 | 0    | 0.6710  |        | 0.6710  |      |   |         |
| SBlaclactis:SLbrevisplant                   | 0 | 0    | 0.4100  |        | 0.4100  |      |   |         |
| SBlaclactis:SLcas                           | 0 | 0    | -0.5500 |        | -0.5500 |      |   |         |
| SBlaclactis:SLreut                          | 0 | 0    | -0.2700 |        | -0.2700 |      |   |         |
| SBlaclactis:SLreutD                         | 0 | 0    | -0.0600 |        | -0.0600 |      |   |         |
| SBlaclactis:SLreutDA                        | 0 | 0    | 0.0700  |        | 0.0700  |      |   |         |
| SBlaclactis:SLreutU                         | 0 | 0    | -0.3100 |        | -0.3100 |      |   |         |
| SBlaclactis:SLsppBsp                        | 0 | 0    | 0.0300  |        | 0.0300  |      |   |         |
| SBlaclactis:SpLac                           | 1 | 1.00 | 0.3100  | 0.3100 |         |      |   |         |
| SBlaclactis:SRP                             | 0 | 0    | 0.0400  |        | 0.0400  |      |   |         |
| SChx:SfaeCbutBmesLspo                       | 0 | 0    | -0.2500 |        | -0.2500 |      |   |         |
| SChx:SLacidLcasBbiflrhamLsal                | 0 | 0    | -0.0010 |        | -0.0010 |      |   |         |
| SChx:SLacidLrhaBlongSboul                   | 0 | 0    | -0.7000 |        | -0.7000 |      |   |         |
| SChx:SLbrevis                               | 0 | 0    | 0.7110  |        | 0.7110  |      |   |         |
| SChx:SLbrevisplant                          | 0 | 0    | 0.4500  |        | 0.4500  |      |   |         |
| SChx:SLcas                                  | 0 | 0    | -0.5100 |        | -0.5100 |      |   |         |
| SChx:SLreut                                 | 0 | 0    | -0.2300 |        | -0.2300 |      |   |         |
| SChx:SLreutD                                | 0 | 0    | -0.0200 |        | -0.0200 |      |   |         |

|                                              |   |      |         |         |  |  |  |  |
|----------------------------------------------|---|------|---------|---------|--|--|--|--|
| SChx:SLreutDA                                | 0 | 0    | 0.1100  | 0.1100  |  |  |  |  |
| SChx:SLreutU                                 | 0 | 0    | -0.2700 | -0.2700 |  |  |  |  |
| SChx:SLsppBsp                                | 0 | 0    | 0.0700  | 0.0700  |  |  |  |  |
| SChx:SpIac                                   | 0 | 0    | 0.3500  | 0.3500  |  |  |  |  |
| SChx:SRP                                     | 1 | 1.00 | 0.0800  | 0.0800  |  |  |  |  |
| SfaeCbutBmesLspo:SLacidLcasBbiFLrhamLsal     | 0 | 0    | 0.2490  | 0.2490  |  |  |  |  |
| SfaeCbutBmesLspo:SLacidLrhaBlongSboul        | 0 | 0    | -0.4500 | -0.4500 |  |  |  |  |
| SfaeCbutBmesLspo:SLbrevis                    | 0 | 0    | 0.9610  | 0.9610  |  |  |  |  |
| SfaeCbutBmesLspo:SLbrevisPlant               | 0 | 0    | 0.7000  | 0.7000  |  |  |  |  |
| SfaeCbutBmesLspo:SLcas                       | 0 | 0    | -0.2600 | -0.2600 |  |  |  |  |
| SfaeCbutBmesLspo:SLreut                      | 0 | 0    | 0.0200  | 0.0200  |  |  |  |  |
| SfaeCbutBmesLspo:SLreutD                     | 0 | 0    | 0.2300  | 0.2300  |  |  |  |  |
| SfaeCbutBmesLspo:SLreutDA                    | 0 | 0    | 0.3600  | 0.3600  |  |  |  |  |
| SfaeCbutBmesLspo:SLreutU                     | 0 | 0    | -0.0200 | -0.0200 |  |  |  |  |
| SfaeCbutBmesLspo:SLsppBsp                    | 0 | 0    | 0.3200  | 0.3200  |  |  |  |  |
| SfaeCbutBmesLspo:SpIac                       | 0 | 0    | 0.6000  | 0.6000  |  |  |  |  |
| SfaeCbutBmesLspo:SRP                         | 2 | 1.00 | 0.3300  | 0.3300  |  |  |  |  |
| SLacidLcasBbiFLrhamLsal:SLacidLrhaBlongSboul | 0 | 0    | -0.6990 | -0.6990 |  |  |  |  |
| SLacidLcasBbiFLrhamLsal:SLbrevis             | 0 | 0    | 0.7120  | 0.7120  |  |  |  |  |
| SLacidLcasBbiFLrhamLsal:SLbrevisPlant        | 0 | 0    | 0.4510  | 0.4510  |  |  |  |  |
| SLacidLcasBbiFLrhamLsal:SLcas                | 0 | 0    | -0.5090 | -0.5090 |  |  |  |  |
| SLacidLcasBbiFLrhamLsal:SLreut               | 0 | 0    | -0.2290 | -0.2290 |  |  |  |  |
| SLacidLcasBbiFLrhamLsal:SLreutD              | 0 | 0    | -0.0190 | -0.0190 |  |  |  |  |
| SLacidLcasBbiFLrhamLsal:SLreutDA             | 0 | 0    | 0.1110  | 0.1110  |  |  |  |  |
| SLacidLcasBbiFLrhamLsal:SLreutU              | 0 | 0    | -0.2690 | -0.2690 |  |  |  |  |
| SLacidLcasBbiFLrhamLsal:SLsppBsp             | 0 | 0    | 0.0710  | 0.0710  |  |  |  |  |
| SLacidLcasBbiFLrhamLsal:SpIac                | 0 | 0    | 0.3510  | 0.3510  |  |  |  |  |
| SLacidLcasBbiFLrhamLsal:SRP                  | 1 | 1.00 | 0.0810  | 0.0810  |  |  |  |  |
| SLacidLrhaBlongSboul:SLbrevis                | 0 | 0    | 1.4110  | 1.4110  |  |  |  |  |
| SLacidLrhaBlongSboul:SLbrevisPlant           | 0 | 0    | 1.1500  | 1.1500  |  |  |  |  |
| SLacidLrhaBlongSboul:SLcas                   | 0 | 0    | 0.1900  | 0.1900  |  |  |  |  |
| SLacidLrhaBlongSboul:SLreut                  | 0 | 0    | 0.4700  | 0.4700  |  |  |  |  |
| SLacidLrhaBlongSboul:SLreutD                 | 0 | 0    | 0.6800  | 0.6800  |  |  |  |  |
| SLacidLrhaBlongSboul:SLreutDA                | 0 | 0    | 0.8100  | 0.8100  |  |  |  |  |
| SLacidLrhaBlongSboul:SLreutU                 | 0 | 0    | 0.4300  | 0.4300  |  |  |  |  |
| SLacidLrhaBlongSboul:SLsppBsp                | 0 | 0    | 0.7700  | 0.7700  |  |  |  |  |
| SLacidLrhaBlongSboul:SpIac                   | 1 | 1.00 | 1.0500  | 1.0500  |  |  |  |  |
| SLacidLrhaBlongSboul:SRP                     | 0 | 0    | 0.7800  | 0.7800  |  |  |  |  |
| SLbrevis:SLbrevisPlant                       | 0 | 0    | -0.2610 | -0.2610 |  |  |  |  |
| SLbrevis:SLcas                               | 0 | 0    | -1.2210 | -1.2210 |  |  |  |  |
| SLbrevis:SLreut                              | 0 | 0    | -0.9410 | -0.9410 |  |  |  |  |
| SLbrevis:SLreutD                             | 0 | 0    | -0.7310 | -0.7310 |  |  |  |  |
| SLbrevis:SLreutDA                            | 0 | 0    | -0.6010 | -0.6010 |  |  |  |  |
| SLbrevis:SLreutU                             | 0 | 0    | -0.9810 | -0.9810 |  |  |  |  |
| SLbrevis:SLsppBsp                            | 0 | 0    | -0.6410 | -0.6410 |  |  |  |  |
| SLbrevis:SpIac                               | 1 | 1.00 | -0.3610 | -0.3610 |  |  |  |  |
| SLbrevis:SRP                                 | 0 | 0    | -0.6310 | -0.6310 |  |  |  |  |
| SLbrevisPlant:SLcas                          | 0 | 0    | -0.9600 | -0.9600 |  |  |  |  |
| SLbrevisPlant:SLreut                         | 0 | 0    | -0.6800 | -0.6800 |  |  |  |  |
| SLbrevisPlant:SLreutD                        | 0 | 0    | -0.4700 | -0.4700 |  |  |  |  |
| SLbrevisPlant:SLreutDA                       | 0 | 0    | -0.3400 | -0.3400 |  |  |  |  |
| SLbrevisPlant:SLreutU                        | 0 | 0    | -0.7200 | -0.7200 |  |  |  |  |
| SLbrevisPlant:SLsppBsp                       | 0 | 0    | -0.3800 | -0.3800 |  |  |  |  |
| SLbrevisPlant:SpIac                          | 1 | 1.00 | -0.1000 | -0.1000 |  |  |  |  |
| SLbrevisPlant:SRP                            | 0 | 0    | -0.3700 | -0.3700 |  |  |  |  |
| SLcas:SLreut                                 | 0 | 0    | 0.2800  | 0.2800  |  |  |  |  |
| SLcas:SLreutD                                | 0 | 0    | 0.4900  | 0.4900  |  |  |  |  |
| SLcas:SLreutDA                               | 0 | 0    | 0.6200  | 0.6200  |  |  |  |  |
| SLcas:SLreutU                                | 0 | 0    | 0.2400  | 0.2400  |  |  |  |  |
| SLcas:SLsppBsp                               | 0 | 0    | 0.5800  | 0.5800  |  |  |  |  |
| SLcas:SpIac                                  | 0 | 0    | 0.8600  | 0.8600  |  |  |  |  |
| SLcas:SRP                                    | 1 | 1.00 | 0.5900  | 0.5900  |  |  |  |  |
| SLreut:SLreutD                               | 0 | 0    | 0.2100  | 0.2100  |  |  |  |  |
| SLreut:SLreutDA                              | 0 | 0    | 0.3400  | 0.3400  |  |  |  |  |
| SLreut:SLreutU                               | 0 | 0    | -0.0400 | -0.0400 |  |  |  |  |
| SLreut:SLsppBsp                              | 0 | 0    | 0.3000  | 0.3000  |  |  |  |  |
| SLreut:SpIac                                 | 1 | 1.00 | 0.5800  | 0.5800  |  |  |  |  |
| SLreut:SRP                                   | 0 | 0    | 0.3100  | 0.3100  |  |  |  |  |
| SLreutD:SLreutDA                             | 0 | 0    | 0.1300  | 0.1300  |  |  |  |  |
| SLreutD:SLreutU                              | 0 | 0    | -0.2500 | -0.2500 |  |  |  |  |
| SLreutD:SLsppBsp                             | 0 | 0    | 0.0900  | 0.0900  |  |  |  |  |
| SLreutD:SpIac                                | 1 | 1.00 | 0.3700  | 0.3700  |  |  |  |  |
| SLreutD:SRP                                  | 0 | 0    | 0.1000  | 0.1000  |  |  |  |  |
| SLreutDA:SLreutU                             | 0 | 0    | -0.3800 | -0.3800 |  |  |  |  |
| SLreutDA:SLsppBsp                            | 0 | 0    | -0.0400 | -0.0400 |  |  |  |  |
| SLreutDA:SpIac                               | 1 | 1.00 | 0.2400  | 0.2400  |  |  |  |  |
| SLreutDA:SRP                                 | 1 | 1.00 | -0.0300 | -0.0300 |  |  |  |  |
| SLreutU:SLsppBsp                             | 0 | 0    | 0.3400  | 0.3400  |  |  |  |  |
| SLreutU:SpIac                                | 0 | 0    | 0.6200  | 0.6200  |  |  |  |  |
| SLreutU:SRP                                  | 1 | 1.00 | 0.3500  | 0.3500  |  |  |  |  |
| SLsppBsp:SpIac                               | 2 | 1.00 | 0.2800  | 0.2800  |  |  |  |  |
| SLsppBsp:SRP                                 | 0 | 0    | 0.0100  | 0.0100  |  |  |  |  |
| SRP:SpIac                                    | 0 | 0    | 0.2700  | 0.2700  |  |  |  |  |

Legend:

- comparison - Treatment comparison
- k - Number of studies providing direct evidence
- prop - Direct evidence proportion
- nma - Estimated treatment effect (MD) in network meta-analysis
- direct - Estimated treatment effect (MD) derived from direct evidence
- indir. - Estimated treatment effect (MD) derived from indirect evidence
- Diff - Difference between direct and indirect treatment estimates
- z - z-value of test for disagreement (direct versus indirect)
- p-value - p-value of test for disagreement (direct versus indirect)

## CAL (long-term studies)

Separate indirect from direct evidence (SIDE) using back-calculation method

Random effects model:

| comparison                 | k | prop | nma     | direct  | indir.  | Diff | z | p-value |
|----------------------------|---|------|---------|---------|---------|------|---|---------|
| SLreutDA:SLreutinrem       | 0 | 0    | -0.4100 | .       | -0.4100 | .    | . | .       |
| SLreutDA:SLreutsingle      | 0 | 0    | -0.3000 | .       | -0.3000 | .    | . | .       |
| SLreutDA:SLrham            | 0 | 0    | 0.0200  | .       | 0.0200  | .    | . | .       |
| SLreutDA:Splac             | 1 | 1.00 | 0.0200  | 0.0200  | .       | .    | . | .       |
| SLreutDA:SSoraluberrat     | 0 | 0    | 0.0700  | .       | 0.0700  | .    | . | .       |
| SLreutinrem:SLreutsingle   | 1 | 1.00 | 0.1100  | 0.1100  | .       | .    | . | .       |
| SLreutinrem:SLrham         | 0 | 0    | 0.4300  | .       | 0.4300  | .    | . | .       |
| SLreutinrem:Splac          | 1 | 1.00 | 0.4300  | 0.4300  | .       | .    | . | .       |
| SLreutinrem:SSoraluberrat  | 0 | 0    | 0.4800  | .       | 0.4800  | .    | . | .       |
| SLreutsingle:SLrham        | 0 | 0    | 0.3200  | .       | 0.3200  | .    | . | .       |
| SLreutsingle:Splac         | 1 | 1.00 | 0.3200  | 0.3200  | .       | .    | . | .       |
| SLreutsingle:SSoraluberrat | 0 | 0    | 0.3700  | .       | 0.3700  | .    | . | .       |
| SLrham:Splac               | 1 | 1.00 | 0.0000  | 0.0000  | .       | .    | . | .       |
| SSoraluberrat:Splac        | 1 | 1.00 | 0.0500  | -0.0500 | .       | .    | . | .       |

Legend:

- comparison - Treatment comparison
- k - Number of studies providing direct evidence
- prop - Direct evidence proportion
- nma - Estimated treatment effect (MD) in network meta-analysis
- direct - Estimated treatment effect (MD) derived from direct evidence
- indir. - Estimated treatment effect (MD) derived from indirect evidence
- Diff - Difference between direct and indirect treatment estimates
- z - z-value of test for disagreement (direct versus indirect)
- p-value - p-value of test for disagreement (direct versus indirect)

## BOP (short-term studies)

### Separate indirect from direct evidence (SIDE) using back-calculation method

Random effects model:

| comparison                                  | k | prop | nma      | direct  | indir.   | Diff | z | p-value |
|---------------------------------------------|---|------|----------|---------|----------|------|---|---------|
| SBlacLacdBbifLrham:SB lactDN                | 0 | 0    | -9.9100  | .       | -9.9100  | .    | . | .       |
| SBlacLacdBbifLrham:SB lactis                | 0 | 0    | 1.5029   | .       | 1.5029   | .    | . | .       |
| SBlacLacdBbifLrham:SLacidl casBbifLrhamLsal | 0 | 0    | 27.2350  | .       | 27.2350  | .    | . | .       |
| SBlacLacdBbifLrham:SLbrevisseptant          | 0 | 0    | 7.8900   | .       | 7.8900   | .    | . | .       |
| SBlacLacdBbifLrham:SLreut                   | 0 | 0    | -25.4900 | .       | -25.4900 | .    | . | .       |
| SBlacLacdBbifLrham:SLreutAA                 | 0 | 0    | -27.6100 | .       | -27.6100 | .    | . | .       |
| SBlacLacdBbifLrham:SLreutD                  | 0 | 0    | -7.8700  | .       | -7.8700  | .    | . | .       |
| SBlacLacdBbifLrham:SLreutDA                 | 0 | 0    | 1.1500   | .       | 1.1500   | .    | . | .       |
| SBlacLacdBbifLrham:SLsppBspp                | 0 | 0    | 5.0203   | .       | 5.0203   | .    | . | .       |
| SBlacLacdBbifLrham:Sp lac                   | 1 | 1.00 | 5.3900   | 5.3900  | .        | .    | . | .       |
| SBlacLacdBbifLrham:SRP                      | 0 | 0    | 26.9000  | .       | 26.9000  | .    | . | .       |
| SB lactDN:SB lactis                         | 0 | 0    | 11.4129  | .       | 11.4129  | .    | . | .       |
| SB lactDN:SLacidl casBbifLrhamLsal          | 0 | 0    | 37.1450  | .       | 37.1450  | .    | . | .       |
| SB lactDN:SLbrevisseptant                   | 0 | 0    | 17.8000  | .       | 17.8000  | .    | . | .       |
| SB lactDN:SLreut                            | 0 | 0    | -15.5800 | .       | -15.5800 | .    | . | .       |
| SB lactDN:SLreutAA                          | 0 | 0    | -17.7000 | .       | -17.7000 | .    | . | .       |
| SB lactDN:SLreutD                           | 0 | 0    | 2.0400   | .       | 2.0400   | .    | . | .       |
| SB lactDN:SLreutDA                          | 0 | 0    | 11.0600  | .       | 11.0600  | .    | . | .       |
| SB lactDN:SLsppBspp                         | 0 | 0    | 14.9303  | .       | 14.9303  | .    | . | .       |
| SB lactDN:Sp lac                            | 1 | 1.00 | 15.3000  | 15.3000 | .        | .    | . | .       |
| SB lactDN:SRP                               | 0 | 0    | 36.8100  | .       | 36.8100  | .    | . | .       |
| SB lactis:SLacidl casBbifLrhamLsal          | 0 | 0    | 25.7321  | .       | 25.7321  | .    | . | .       |
| SB lactis:SLbrevisseptant                   | 0 | 0    | 6.3871   | .       | 6.3871   | .    | . | .       |
| SB lactis:SLreut                            | 0 | 0    | -26.9929 | .       | -26.9929 | .    | . | .       |
| SB lactis:SLreutAA                          | 0 | 0    | -29.1129 | .       | -29.1129 | .    | . | .       |
| SB lactis:SLreutD                           | 0 | 0    | -9.3729  | .       | -9.3729  | .    | . | .       |
| SB lactis:SLreutDA                          | 0 | 0    | -0.3529  | .       | -0.3529  | .    | . | .       |
| SB lactis:SLsppBspp                         | 0 | 0    | 3.5174   | .       | 3.5174   | .    | . | .       |
| SB lactis:Sp lac                            | 2 | 1.00 | 3.8871   | 3.8871  | .        | .    | . | .       |
| SB lactis:SRP                               | 0 | 0    | 25.3971  | .       | 25.3971  | .    | . | .       |
| SLacidl casBbifLrhamLsal:SLbrevisseptant    | 0 | 0    | -19.3450 | .       | -19.3450 | .    | . | .       |
| SLacidl casBbifLrhamLsal:SLreut             | 0 | 0    | -52.7250 | .       | -52.7250 | .    | . | .       |
| SLacidl casBbifLrhamLsal:SLreutAA           | 0 | 0    | -54.8450 | .       | -54.8450 | .    | . | .       |
| SLacidl casBbifLrhamLsal:SLreutD            | 0 | 0    | -35.1050 | .       | -35.1050 | .    | . | .       |
| SLacidl casBbifLrhamLsal:SLreutDA           | 0 | 0    | -26.0850 | .       | -26.0850 | .    | . | .       |
| SLacidl casBbifLrhamLsal:SLsppBspp          | 0 | 0    | -22.2147 | .       | -22.2147 | .    | . | .       |
| SLacidl casBbifLrhamLsal:Sp lac             | 0 | 0    | -21.8450 | .       | -21.8450 | .    | . | .       |
| SLacidl casBbifLrhamLsal:SRP                | 1 | 1.00 | -0.3350  | -0.3350 | .        | .    | . | .       |
| SLbrevisseptant:SLreut                      | 0 | 0    | -33.3800 | .       | -33.3800 | .    | . | .       |
| SLbrevisseptant:SLreutAA                    | 0 | 0    | -35.5000 | .       | -35.5000 | .    | . | .       |
| SLbrevisseptant:SLreutD                     | 0 | 0    | -15.7600 | .       | -15.7600 | .    | . | .       |
| SLbrevisseptant:SLreutDA                    | 0 | 0    | -6.7400  | .       | -6.7400  | .    | . | .       |
| SLbrevisseptant:SLsppBspp                   | 0 | 0    | -2.8697  | .       | -2.8697  | .    | . | .       |
| SLbrevisseptant:Sp lac                      | 1 | 1.00 | -2.5000  | -2.5000 | .        | .    | . | .       |
| SLbrevisseptant:SRP                         | 0 | 0    | 19.0100  | .       | 19.0100  | .    | . | .       |
| SLreut:SLreutAA                             | 0 | 0    | -2.1200  | .       | -2.1200  | .    | . | .       |
| SLreut:SLreutD                              | 0 | 0    | 17.6200  | .       | 17.6200  | .    | . | .       |
| SLreut:SLreutDA                             | 0 | 0    | 26.6400  | .       | 26.6400  | .    | . | .       |
| SLreut:SLsppBspp                            | 0 | 0    | 30.5103  | .       | 30.5103  | .    | . | .       |
| SLreut:Sp lac                               | 1 | 1.00 | 30.8800  | 30.8800 | .        | .    | . | .       |
| SLreut:SRP                                  | 0 | 0    | 52.3900  | .       | 52.3900  | .    | . | .       |
| SLreutAA:SLreutD                            | 0 | 0    | 19.7400  | .       | 19.7400  | .    | . | .       |
| SLreutAA:SLreutDA                           | 0 | 0    | 28.7600  | .       | 28.7600  | .    | . | .       |
| SLreutAA:SLsppBspp                          | 0 | 0    | 32.6303  | .       | 32.6303  | .    | . | .       |
| SLreutAA:Sp lac                             | 1 | 1.00 | 33.0000  | 33.0000 | .        | .    | . | .       |
| SLreutAA:SRP                                | 0 | 0    | 54.5100  | .       | 54.5100  | .    | . | .       |
| SLreutD:SLreutDA                            | 0 | 0    | 9.0200   | .       | 9.0200   | .    | . | .       |
| SLreutD:SLsppBspp                           | 0 | 0    | 12.8903  | .       | 12.8903  | .    | . | .       |
| SLreutD:Sp lac                              | 1 | 1.00 | 13.2600  | 13.2600 | .        | .    | . | .       |
| SLreutD:SRP                                 | 0 | 0    | 34.7700  | .       | 34.7700  | .    | . | .       |
| SLreutDA:SLsppBspp                          | 0 | 0    | 3.8703   | .       | 3.8703   | .    | . | .       |
| SLreutDA:Sp lac                             | 1 | 1.00 | 4.2400   | 4.2400  | .        | .    | . | .       |
| SLreutDA:SRP                                | 1 | 1.00 | 25.7500  | 25.7500 | .        | .    | . | .       |
| SLsppBspp:Sp lac                            | 2 | 1.00 | 0.3697   | 0.3697  | .        | .    | . | .       |
| SLsppBspp:SRP                               | 0 | 0    | 21.8797  | .       | 21.8797  | .    | . | .       |
| SRP:Sp lac                                  | 0 | 0    | -21.5100 | .       | -21.5100 | .    | . | .       |

Legend:

- comparison - Treatment comparison
- k - Number of studies providing direct evidence
- prop - Direct evidence proportion
- nma - Estimated treatment effect (MD) in network meta-analysis
- direct - Estimated treatment effect (MD) derived from direct evidence
- indir. - Estimated treatment effect (MD) derived from indirect evidence
- Diff - Difference between direct and indirect treatment estimates
- z - z-value of test for disagreement (direct versus indirect)
- p-value - p-value of test for disagreement (direct versus indirect)

## BOP (long-term studies)

### Separate indirect from direct evidence (SIDE) using back-calculation method

Random effects model:

| comparison                 | k | prop | nma      | direct  | indir.   | Diff | z | p-value |
|----------------------------|---|------|----------|---------|----------|------|---|---------|
| SLreutDA:SLreutinrem       | 0 | 0    | -15.2657 | .       | -15.2657 | .    | . | .       |
| SLreutDA:SLreutsingle      | 0 | 0    | -11.9457 | .       | -11.9457 | .    | . | .       |
| SLreutDA:SLrham            | 0 | 0    | 4.6443   | .       | 4.6443   | .    | . | .       |
| SLreutDA:Splac             | 2 | 1.00 | 8.0443   | 8.0443  | .        | .    | . | .       |
| SLreutDA:SSoraluberrat     | 0 | 0    | 3.0243   | .       | 3.0243   | .    | . | .       |
| SLreutinrem:SLreutsingle   | 1 | 1.00 | 3.3200   | 3.3200  | .        | .    | . | .       |
| SLreutinrem:SLrham         | 0 | 0    | 19.9100  | .       | 19.9100  | .    | . | .       |
| SLreutinrem:Splac          | 1 | 1.00 | 23.3100  | 23.3100 | .        | .    | . | .       |
| SLreutinrem:SSoraluberrat  | 0 | 0    | 18.2900  | .       | 18.2900  | .    | . | .       |
| SLreutsingle:SLrham        | 0 | 0    | 16.5900  | .       | 16.5900  | .    | . | .       |
| SLreutsingle:Splac         | 1 | 1.00 | 19.9900  | 19.9900 | .        | .    | . | .       |
| SLreutsingle:SSoraluberrat | 0 | 0    | 14.9700  | .       | 14.9700  | .    | . | .       |
| SLrham:Splac               | 1 | 1.00 | 3.4000   | 3.4000  | .        | .    | . | .       |
| SLrham:SSoraluberrat       | 0 | 0    | -1.6200  | .       | -1.6200  | .    | . | .       |
| SSoraluberrat:Splac        | 1 | 1.00 | 5.0200   | 5.0200  | .        | .    | . | .       |

Legend:

- comparison - Treatment comparison
- k - Number of studies providing direct evidence
- prop - Direct evidence proportion
- nma - Estimated treatment effect (MD) in network meta-analysis
- direct - Estimated treatment effect (MD) derived from direct evidence
- indir. - Estimated treatment effect (MD) derived from indirect evidence
- Diff - Difference between direct and indirect treatment estimates
- z - z-value of test for disagreement (direct versus indirect)
- p-value - p-value of test for disagreement (direct versus indirect)

## References

- Abuazab, D. R., El-Shinnawi, U. M., & El-Daker, M. A. (2021). Efficacy of Locally Delivered Bifidobacterium Probiotic Gel as an Adjunctive Therapy in Periodontitis Patients (Clinical and Microbiological Study). *Mansoura Journal of Dentistry*, 8(3), 1-11. doi:10.21608/mjd.2021.200160
- Alshareef, A., Attia, A., Almalki, M., Alsharif, F., Melibari, A., Mirdad, B., . . . Dardir, A. (2020). Effectiveness of Probiotic Lozenges in Periodontal Management of Chronic Periodontitis Patients: Clinical and Immunological Study. *Eur J Dent*, 14(2), 281-287. doi:10.1055/s-0040-1709924
- Butera, A., Gallo, S., Maiorani, C., Molino, D., Chiesa, A., Preda, C., . . . Scribante, A. (2020). Probiotic Alternative to Chlorhexidine in Periodontal Therapy: Evaluation of Clinical and Microbiological Parameters. *Microorganisms*, 9(1). doi:10.3390/microorganisms9010069
- Chandra, R. V., Swathi, T., Reddy, A., Chakravarthy, Y., Nagarajan, S., & Naveen, A. (2016). Effect of a Locally Delivered Probiotic/Prebiotic Mixture as an Adjunct to Scaling and Root Planing in the Management of Chronic Periodontitis. *Journal of the International Academy of Periodontology*, 18(3), 67-75.
- Costacurta, M., Sicuro, L., Margiotta, S., Ingrassiotta, I., & Docimo, R. (2018). Clinical effects of lactobacillus reuteri probiotic in treatment of chronic periodontitis. A randomized, controlled trial. *ORAL & Implantology*, 4, 191-198.
- de Oliveira, A. M., Lourenco, T. G. B., & Colombo, A. P. V. (2022). Impact of systemic probiotics as adjuncts to subgingival instrumentation on the oral-gut microbiota associated with periodontitis: A randomized controlled clinical trial. *J Periodontol*, 93(1), 31-44. doi:10.1002/JPER.21-0078
- Dhaliwal, P. K., Grover, V., Malhotra, R., & Kapoor, A. (2017). Clinical and Microbiological Investigation of the Effects of Probiotics Combined with Scaling and Root Planing in the Management of Chronic Periodontitis: A Randomized, Controlled Study. *J Int Acad Periodontol*, 19(3), 101-108. Retrieved from <https://www.ncbi.nlm.nih.gov/pubmed/31473697>
- El-Bagoory, G. K. M., El-Guindy, H. M., Shoukheba, M. Y. M., & El-Zamarany, E. A. (2021). The adjunctive effect of probiotics to nonsurgical treatment of chronic periodontitis: A randomized controlled clinical trial. *J Indian Soc Periodontol*, 25(6), 525-531. doi:10.4103/jisp.jisp\_114\_21
- Ghasemi, S., Babaloo, A. R., Mohammadi, B., & Esmailzadeh, M. (2020). Evaluating the effect of probiotic supplementation in the form of mouthwash along with scaling and root planing on periodontal indices in patients with stage III and grade A generalized periodontitis: A randomized clinical trial. *Journal of Advanced Periodontology & Implant Dentistry*, 12(2), 73-78. doi:10.34172/japid.2020.013
- Grover, V. Thesis - handsearch.
- Ikram, S., Raffat, M. A., Baig, S., Ansari, S. A., Borges, K. J. J., & Hassan, N. (2019). Clinical Efficacy of Probiotics as An Adjunct to Scaling and Root Planning in The Treatment Of Chronic Periodontitis. *Annals Abbasi Shaheed Hospital & Karachi Medical & Dental College*, 24(1), 31-37.
- Ince, G., Gursoy, H., Ipci, S. D., Cakar, G., Emekli-Alturfan, E., & Yilmaz, S. (2015). Clinical and Biochemical Evaluation of Lozenges Containing Lactobacillus reuteri as an Adjunct to Non-Surgical Periodontal Therapy in Chronic Periodontitis. *J Periodontol*, 86(6), 746-754. doi:10.1902/jop.2015.140612
- Invernici, M. M., Furlaneto, F. A. C., Salvador, S. L., Ouwehand, A. C., Salminen, S., Mantziari, A., . . . Messori, M. R. (2020). Bifidobacterium animalis subsp lactis

- HN019 presents antimicrobial potential against periodontopathogens and modulates the immunological response of oral mucosa in periodontitis patients. *PLoS One*, 15(9), e0238425. doi:10.1371/journal.pone.0238425
- Invernici, M. M., Salvador, S. L., Silva, P. H. F., Soares, M. S. M., Casarin, R., Palioto, D. B., . . . Messoria, M. R. (2018). Effects of Bifidobacterium probiotic on the treatment of chronic periodontitis: A randomized clinical trial. *J Clin Periodontol*, 45(10), 1198-1210. doi:10.1111/jcpe.12995
- Jebin, A. A., Nisha, K. J., & Padmanabhan, S. (2021). Oral Microbial Shift Following 1-Month Supplementation of Probiotic Chewable Tablets Containing Lactobacillus reuteri UBLRu-87 as an Adjunct to Phase 1 Periodontal Therapy in Chronic Periodontitis Patients: A Randomized Controlled Clinical Trial. *Contemp Clin Dent*, 12(2), 121-127. doi:10.4103/ccd.ccd\_135\_20
- Kanagaraj, S. S., Elavarasu, S., Thangavelu, A., Subaramoniam, M. K., & Dutta, T. (2019). The evaluation of probiotic as an adjunct to scaling and root planing in chronic periodontitis patients - A clinical, microbiological and biochemical study. *International Journal of Oral Health Dentistry*, 5(1), 32-36. doi:10.18231/j.ijohd.2019.008
- Kumar, V., Singhal, R., Rastogi, P., Lal, N., Pandey, S., & Mahdi, A. A. (2021). Localized probiotic-guided pocket recolonization in the treatment of chronic periodontitis: a randomized controlled clinical trial. *J Periodontal Implant Sci*, 51(3), 199-212. doi:10.5051/jpis.2004140207
- Laleman, I., Yilmaz, E., Ozcelik, O., Haytac, C., Pauwels, M., Herrero, E. R., . . . Teughels, W. (2015). The effect of a streptococci containing probiotic in periodontal therapy: a randomized controlled trial. *J Clin Periodontol*, 42(11), 1032-1041. doi:10.1111/jcpe.12464
- Meenakshi, S. S., & Varghese, S. (2018). Adjunctive effect of probiotic (Lactobacillus casei Shirota) to scaling and root planing in the management of chronic periodontitis. *Drug Invention Today*, 10(8), 1381-1386.
- Minic, I., Pejčić, A., & Bradic-Vasic, M. (2022). Effect of the local probiotics in the therapy of periodontitis A randomized prospective study. *Int J Dent Hyg*, 20(2), 401-407. doi:10.1111/idh.12509
- Morales, A., Carvajal, P., Silva, N., Hernandez, M., Godoy, C., Rodriguez, G., . . . Gamonal, J. (2016). Clinical Effects of Lactobacillus rhamnosus in Non-Surgical Treatment of Chronic Periodontitis: A Randomized Placebo-Controlled Trial With 1-Year Follow-Up. *J Periodontol*, 87(8), 944-952. doi:10.1902/jop.2016.150665
- Oliveira, A. M. d., Lourenço, T. G. B., & Colombo, A. P. V. (2021). Impact of systemic probiotics as adjuncts to subgingival instrumentation on the oral-gut microbiota associated to periodontitis: a randomized controlled clinical trial. *peer review*. doi:10.1111/jper.10797
- Ozener, H. O., Kuru, L., Kadir, T., & Kuru, B. (2023). Bifidobacterium animalis subsp. lactis as adjunct to non-surgical periodontal treatment in periodontitis: a randomized controlled clinical trial. *Clin Oral Investig*, 27(5), 1965-1972. doi:10.1007/s00784-023-04870-1
- Paul, G. T., Gandhimadhi, D., & Babu, S. P. K. K. (2019). A Double-blind, Placebo Controlled Study to Assess the Clinical and Microbiological Effects of a Probiotic Lozenge as an Adjunctive Therapy in the Management of Chronic Periodontitis. *Journal of Health and Research*, 6(1), 57-63. doi:10.4103/cjhr.cjhr\_71\_18



- Pelekos, G., Acharya, A., Eiji, N., Hong, G., Leung, W. K., & McGrath, C. (2020). Effects of adjunctive probiotic *L. reuteri* lozenges on S/RSD outcomes at molar sites with deep pockets. *J Clin Periodontol*, *47*(9), 1098-1107. doi:10.1111/jcpe.13329
- Penala, S., Kalakonda, B., Pathakota, K. R., Jayakumar, A., Koppolu, P., Lakshmi, B. V., . . . Mishra, A. (2016). Efficacy of local use of probiotics as an adjunct to scaling and root planing in chronic periodontitis and halitosis: A randomized controlled trial. *J Res Pharm Pract*, *5*(2), 86-93. doi:10.4103/2279-042x.179568
- Pudgar, P., Povsic, K., Cuk, K., Seme, K., Petelin, M., & Gaspersic, R. (2021). Probiotic strains of *Lactobacillus brevis* and *Lactobacillus plantarum* as adjunct to non-surgical periodontal therapy: 3-month results of a randomized controlled clinical trial. *Clin Oral Investig*, *25*(3), 1411-1422. doi:10.1007/s00784-020-03449-4
- Ranjith, A., Nazimudeen, N. B., & Baiju, K. V. (2022). Probiotic mouthwash as an adjunct to mechanical therapy in the treatment of stage II periodontitis: A randomized controlled clinical trial. *Int J Dent Hyg*, *20*(2), 415-421. doi:10.1111/idh.12589
- Tekce, M., Ince, G., Gursoy, H., Dirikan Ipci, S., Cakar, G., Kadir, T., & Yilmaz, S. (2015). Clinical and microbiological effects of probiotic lozenges in the treatment of chronic periodontitis: a 1-year follow-up study. *J Clin Periodontol*, *42*(4), 363-372. doi:10.1111/jcpe.12387
- Teughels, W., Durukan, A., Ozcelik, O., Pauwels, M., Quirynen, M., & Haytac, M. C. (2013). Clinical and microbiological effects of *Lactobacillus reuteri* probiotics in the treatment of chronic periodontitis: a randomized placebo-controlled study. *J Clin Periodontol*, *40*(11), 1025-1035. doi:10.1111/jcpe.12155
- Theodoro, L. H., Claudio, M. M., Nuernberg, M. A. A., Miessi, D. M. J., Batista, J. A., Duque, C., & Garcia, V. G. (2019). Effects of *Lactobacillus reuteri* as an adjunct to the treatment of periodontitis in smokers: randomised clinical trial. *Benef Microbes*, *10*(4), 375-384. doi:10.3920/BM2018.0150
- Tsubura, S., Mizunuma, H., Ishikawa, S., Oyake, I., Okabayashi, M., Katoh, K., . . . Toda, T. (2009). The effect of *Bacillus subtilis* mouth rinsing in patients with periodontitis. *Eur J Clin Microbiol Infect Dis*, *28*(11), 1353-1356. doi:10.1007/s10096-009-0790-9
- Vicario, M., Santos, A., Violant, D., Nart, J., & Giner, L. (2013). Clinical changes in periodontal subjects with the probiotic *Lactobacillus reuteri* Prodentis: a preliminary randomized clinical trial. *Acta Odontol Scand*, *71*(3-4), 813-819. doi:10.3109/00016357.2012.734404
